# Supplementary material for: Guanidine-centred reactivity of CNN Pd(ii) pincer complexes including carboxylate-assisted N–H activation and –CH2– → –C(O)– oxygenation
Source: Royal Society of Chemistry journal article supplement (doi:10.1039/d3nj05516g), 2024-01-01
Supplement: d3nj05516g2.pdf [file d3nj05516g2.pdf]

## Electronic supplementary information

# Guanidine centered reactivity of CNN Pd(II) pincer complexes including carboxylate assisted N–H activation and –CH<sub>2</sub>– → –C(O)– oxygenation

Nitish Kumar Sinha,<sup>a</sup> Hilal Ahmad Khan,<sup>b</sup> Chinnappan Sivasankar<sup>b</sup> and Natesan Thirupathi<sup>\*a</sup>

<sup>a</sup>*Department of Chemistry, University of Delhi, Delhi 110 007, India*

<sup>b</sup>*Catalysis and Energy Laboratory, Department of Chemistry, Pondicherry University (A Central University), Puducherry 605 014, India*

\*Corresponding author: Email: tnat@chemistry.du.ac.in, thirupathi\_n@yahoo.com.

### Table of contents

|                                                                                                              |           |
|--------------------------------------------------------------------------------------------------------------|-----------|
| 1. General consideration                                                                                     | S2        |
| 2. X-ray crystallography                                                                                     | S2        |
| 3. Experimental section                                                                                      | S3–S13    |
| 4. Crystallographic data                                                                                     | S14–S16   |
| 5. Electronic energies determined by DFT                                                                     | S17       |
| 6. Molecular structures of <b>3</b> ·½ toluene, <b>5</b> ·½ toluene·½ pivalic acid, <b>6</b> , and <b>15</b> | S18–S20   |
| 7. Non-covalent interactions                                                                                 | S21–S28   |
| 8. NMR spectra of pincer complexes                                                                           | S29–S115  |
| 9. Optimization of time for cycloisomerization reaction                                                      | S116      |
| 10. ESI-MS and elemental analyses data of complexes                                                          | S117–S135 |
| 11. References                                                                                               | S136–S137 |

**General considerations** All chemicals were purchased from commercial vendors and used as received. Pd(OC(O)<sup>t</sup>Bu)<sub>2</sub> was prepared from Pd(OAc)<sub>2</sub> and pivalic acid as reported in the literature.<sup>1</sup> Guanidines **1** and **2** were prepared following the literature procedures.<sup>2</sup> The IR spectral data were obtained through ATR method from powdered samples on an IRAffinity-1 Shimadzu FTIR spectrometer in the frequency range 400–4000 cm<sup>-1</sup>. Elemental analyses were performed on an Elementar Analysensysteme GmbH VarioEL V3.00. <sup>1</sup>H, <sup>13</sup>C{<sup>1</sup>H}, <sup>19</sup>F NMR and <sup>31</sup>P{<sup>1</sup>H} NMR spectra were recorded on a JEOL ECX 400 NMR and Bruker AV-400 NMR spectrometers operating at 400, 100.5, 376.5 MHz and 161.8 MHz, respectively. All NMR measurements were made at room temperature unless mentioned otherwise. The δ (<sup>1</sup>H) and δ (<sup>13</sup>C{<sup>1</sup>H}) are reported in ppm relative to tetramethylsilane or residual solvent signal. Melting points were recorded on a Buchi melting point apparatus (Model: M-560) and the reported values are uncorrected.

**X-Ray crystallography** Details of data collection, structure solution and refinement for structurally characterized compounds are presented in Tables S1–S3. X-ray crystallographic diffraction data were collected on Oxford Xcalibur S diffractometer (4-circle kappa goniometer, Sapphire-3 CCD detector, omega scans, graphite monochromator and a single wavelength Enhance X-ray source with MoKα radiation) or Rigaku XtaLAB Synergy (4-circle goniometer, Hybrid Pixel Array Detector, omega scans, graphite monochromator and PhotonJet (Mo) X-ray source type with micro-focus sealed X-ray tube).<sup>3</sup> Pre-experiment, data collection, data reduction and absorption corrections were performed with the CrysAlisPro software suite.<sup>4</sup> The structures were solved and refined using the SHELX-2017 program package<sup>5</sup> and SHELXL-2017/1 (within the Olex2 1.2 program package).<sup>6</sup> Non-hydrogen atoms were refined anisotropically. C–H/N–H hydrogen atoms were placed in geometrically calculated positions by using a riding model. The molecular structures were created using Olex2 1.2 program package<sup>6</sup> and Diamond software.<sup>7</sup>

**DFT calculations** The proposed pathway in Scheme 6 was evaluated computationally by using the B3LYP/6-31G\*/LANL2DZ level of theory<sup>8-15</sup> and simulating the complexes by substituting hydrogen in place of -CF<sub>3</sub> and CH<sub>3</sub>NC in place of XylNC. Using the Gaussian 09 software,<sup>16</sup> DFT calculations were performed on **G**, **H**, **H'**, **H'**, **I**, **TS**, **J**, **K** and **K'** and all the molecules were successfully optimized without any imaginary frequency except **TS**. Solvent correction for toluene was performed using the polarizable continuum model on all the optimized systems.<sup>17-19</sup> The energies of DFT modelled species are listed in Table S4.

**Experimental section** Some complexes were not characterized by <sup>13</sup>C{<sup>1</sup>H} NMR spectroscopy due to their poor solubility in CDCl<sub>3</sub> and DMSO-*d*<sub>6</sub>.

**Complexes 3·½ toluene, 4·¼ toluene and 5·½ toluene·½ pivalic acid** A 25 mL Round Bottom (RB) was charged with the guanidine **1** (100 mg, 0.303 mmol) and Pd(OC(O)R')<sub>2</sub> (R' = CF<sub>3</sub> (101 mg, 0.304 mmol), Me (68.0 mg, 0.303 mmol) and <sup>t</sup>Bu (93.5 mg, 0.303 mmol)) separately and the resulting heterogeneous mixture dispersed in a freshly distilled toluene (10 mL). The contents in the RB flask were stirred and heated at 65 °C for 6 h. The complete consumption of the guanidine was verified by TLC in each case using MeOH/ethyl acetate (1/4, v/v) mixture as the eluent. The reaction mixture was filtered while hot through a Whatman filter paper and the filtrate stored at RT for one week to afford **3·½ toluene** as brown solid, **4·¼ toluene** as colourless crystals and **5·½ toluene·½ pivalic acid** as pale yellow crystals suitable for SCXRD.

**Data for 3·½ toluene** Yield = 78% (130 mg, 0.237 mmol). M.p. 226.4 °C (decomp.). <sup>1</sup>H NMR (CDCl<sub>3</sub>, 400 MHz): δ 8.48 (s, 1 H, *NH*), 8.12 (d, *J*<sub>HH</sub> = 4.8 Hz, 1 H, *ArH*), 7.42–7.36 (m, 2 H, *ArH*), 7.14–7.09 (m, 2 H, *ArH*), 7.05 (t, *J*<sub>HH</sub> = 7.6 Hz, 1 H, *ArH*), 6.89 (d, *J*<sub>HH</sub> = 8.0 Hz, 1 H, *ArH*), 6.83–6.80 (m, 3 H, *ArH*), 6.23 (s, 1 H, *NH*), 5.82 (d, *J*<sub>HH</sub> = 7.6 Hz, 1 H, *ArH*), 5.76 (br, 2 H, *CH*<sub>2</sub>), 1.96, 1.40 (each s, 2 × 3 H, *CH*<sub>3</sub>). <sup>19</sup>F NMR (CDCl<sub>3</sub>, 376.5 MHz): δ –74.44. Anal. Calcd for

$C_{23}H_{21}F_3N_4O_2Pd$  (MW = 548.862 g/mol): C, 50.33; H, 3.86; N, 10.21; Found: C, 50.18; H, 3.70; N, 10.19. IR (KBr,  $cm^{-1}$ ):  $\nu(NH)$  3420 (w), 3215 (br);  $\nu_a(OCO)$  1674 (s);  $\nu(C=N)$  1636 (s);  $\nu_s(OCO)$  1354 (m). ESI-MS ( $m/z$ ): calcd for  $[M - OC(O)CF_3 + MeCN]^+$  476.1067, found 476.1072, calcd for  $[M - OC(O)CF_3]^+$  435.0801, found 435.0812.

**Data for 4·¼ toluene** Yield = 81% (121 mg, 0.244 mmol). M.p. 238.0 °C (decomp.).  $^1H$  NMR ( $CDCl_3$ , 400 MHz):  $\delta$  9.24 (s, 1 H, *NH*), 8.28 (d,  $J_{HH} = 4.8$  Hz, 1 H, *ArH*), 7.55 (d,  $J_{HH} = 7.2$  Hz, 1 H, *ArH*), 7.34 (t,  $J_{HH} = 7.6$  Hz, 1 H, *ArH*), 7.27–7.23 (m, 2 H, *ArH*, toluene), 7.18–7.16 (m, 3 H, *ArH*, toluene), 7.11 (t,  $J_{HH} = 6.6$  Hz, 1 H, *ArH*), 7.06 (d,  $J_{HH} = 7.6$  Hz, 1 H, *ArH*), 7.00 (t,  $J_{HH} = 7.4$  Hz, 1 H, *ArH*), 6.85–6.75 (m, 4 H, *ArH*), 6.18 (s, 1 H, *NH*), 6.08 (d,  $J_{HH} = 7.2$  Hz, 1 H, *ArH*), 5.69 (br, 2 H, *CH*<sub>2</sub>), 2.35 (s, 3 H, *CH*<sub>3</sub>, toluene), 2.28, 1.95, 1.36 (each s, 3 × 3 H, *CH*<sub>3</sub>). Anal. Calcd for  $C_{23}H_{24}N_4O_2Pd \cdot \frac{1}{4} C_7H_8$  (MW = 494.891 + 23.035 g/mol): C, 57.40; H, 5.06; N, 10.82; Found: C, 57.06; H, 5.01; N, 11.09. IR (KBr,  $cm^{-1}$ ):  $\nu(NH)$  3421 (m);  $\nu_a(OCO)$  1641 (s);  $\nu(C=N)$  1589 (s);  $\nu_s(OCO)$  1381 (m). ESI-MS ( $m/z$ ): calcd for  $[M - OC(O)Me + MeCN]^+$  476.1067, found 476.1074, calcd for  $[M - OC(O)Me]^+$  435.0801, found 435.0808.

**Data for 5·½ toluene·½ pivalic acid** Yield = 69% (112 mg, 0.209 mmol). M.p. 260.1 °C (decomp.).  $^1H$  NMR ( $CDCl_3$ , 400 MHz):  $\delta$  9.47 (s, 1 H, *NH*), 8.24 (d,  $J_{HH} = 5.2$  Hz, 1 H, *ArH*), 7.56 (br d,  $J_{HH} = 5.6$  Hz, 1 H, *ArH*), 7.28 (t,  $J_{HH} = 7.6$  Hz, 1 H, *ArH*), 7.10 (t,  $J_{HH} = 6.4$  Hz, 1 H, *ArH*), 7.07–7.00 (m, 3 H, *ArH*), 6.96 (br t,  $J_{HH} = 6.8$  Hz, 1 H, *ArH*), 6.74–6.64 (m, 5 H, *ArH* + *CH*<sub>2</sub>), 6.01 (s, 1 H, *NH*), 1.92 (s, 3 H, *CH*<sub>3</sub>), 1.33 (s, 9 H, *C(CH*<sub>3</sub>)<sub>3</sub>), 1.29 (s, 3 H, *CH*<sub>3</sub>).  $^{13}C\{^1H\}$  NMR ( $CDCl_3$ , 100.5 MHz):  $\delta$  185.9, 161.5, 146.8, 146.3, 137.1, 136.7, 134.7, 134.4, 133.9, 130.9, 126.8, 126.6, 126.5, 126.3, 125.3, 121.7, 120.3, 120.1, 120.0, 60.4, 40.0, 38.7, 28.8, 27.5, 17.8, 16.8. Anal. Calcd for  $C_{26}H_{30}N_4O_2Pd \cdot \frac{1}{2} C_7H_8$  (MW = 536.972 + 46.070 g/mol): C, 60.77; H, 5.88; N, 9.61; Found: C, 61.12; H, 5.57; N, 9.73. IR (KBr,  $cm^{-1}$ ):  $\nu(NH)$  3420 (w);  $\nu_a(OCO)$  1707 (s);

$\nu(\text{C}=\text{N})$  1640 (m);  $\nu_s(\text{OCO})$  1354 (m). ESI-MS ( $m/z$ ): calcd for  $[\text{M} - \text{OC}(\text{O})\text{'Bu} + \text{MeCN}]^+$  476.1067, found 476.1084; calcd for  $[\text{M} - \text{OC}(\text{O})\text{'Bu}]^+$  435.0801, found 435.0818.

**Complexes 6–9** A 25 mL RB was charged with the guanidine, **2** (100 mg, 0.228 mmol) and  $\text{Pd}(\text{OC}(\text{O})\text{R}')_2$  ( $\text{R}' = \text{CF}_3$  (75.8 mg, 0.228 mmol), Me (51.2 mg, 0.228 mmol) and 'Bu (70.4 mg, 0.228 mmol)) separately and the resulting heterogeneous mixture dispersed in a freshly distilled toluene (10 mL). The contents in the RB flask were stirred and heated at 65 °C for 6 h. The complete consumption of the guanidine was verified by TLC in each case using ethyl acetate/*n*-hexane (1/1, v/v) mixture as the eluent. The reaction mixture was filtered while hot through a Whatman filter paper and the filtrate stored at RT for one week to afford **6**, an admixture of **7** + **9** and **8** as white, light brown and pale yellow solids, respectively. Complexes **6** and **7** were obtained as colorless crystals suitable for SCXRD in toluene at RT over the period of five days.

**Data for 6** Yield = 66% (99.0 mg, 0.151 mmol). M.p. 255.0 °C (decomp.).  $^1\text{H}$  NMR ( $\text{CDCl}_3$ , 400 MHz):  $\delta$  8.75 (s, 1 H, *NH*), 8.12 (d,  $J_{\text{HH}} = 5.6$  Hz, 1 H, *ArH*), 7.71–7.68 (m, 2 H, *ArH*), 7.48 (dt,  $J_{\text{HH}} = 7.6$  Hz,  $J_{\text{HH}} = 1.6$  Hz, 1 H, *ArH*), 7.41 (t,  $J_{\text{HH}} = 7.6$  Hz, 1 H, *ArH*), 7.36 (d,  $J_{\text{HH}} = 7.6$  Hz, 1 H, *ArH*), 7.20–7.13 (m, 2 H, *ArH*), 6.98–6.95 (m, 2 H, *NH* + *ArH*), 6.64 (d,  $J_{\text{HH}} = 2.4$  Hz, 1 H, *ArH*), 5.97 (d,  $J_{\text{HH}} = 8.0$  Hz, 1 H, *ArH*), 5.69 (br, 2 H, *CH}\_2*).  $^{19}\text{F}$  NMR ( $\text{CDCl}_3$ , 376.5 MHz):  $\delta$  -61.28, -61.38 and -74.50. Anal. Calcd for  $\text{C}_{23}\text{H}_{15}\text{N}_4\text{F}_9\text{O}_2\text{Pd}$  (MW = 656.805 g/mol): C, 42.06; H, 2.30; N, 8.53. Found: C, 42.33; H, 2.01; N, 8.76. IR (KBr,  $\text{cm}^{-1}$ ):  $\nu(\text{NH})$  3433 (w), 3231 (br w);  $\nu_a(\text{OCO})$  1672 (s);  $\nu(\text{C}=\text{N})$  1647 (m);  $\nu_s(\text{OCO})$  1308 (m). ESI-MS ( $m/z$ ): calcd for  $[\text{M} - \text{OC}(\text{O})\text{CF}_3 + \text{MeCN}]^+$  584.0501, found 584.0514.

**Data for 7 + 9** Yield = 82% (113 mg, 0.187 mmol). M.p. 248.0 °C (decomp.). The  $^1\text{H}$  NMR spectrum indicated the presence of two species in about 1.00:0.12 ratio as estimated from the integrals of aromatic and *NH* protons.  $^1\text{H}$  NMR ( $\text{CDCl}_3$ , 400 MHz):  $\delta$  9.74 (s, 1 H, *NH*, **7**),

9.35 (s, 1 H, NH, **9**), 8.23 (d,  $J_{\text{HH}} = 5.2$  Hz, 1 H, ArH, **7**), 8.12 (d,  $J_{\text{HH}} = 5.2$  Hz, 1 H, ArH, **9**), 7.90 (d,  $J_{\text{HH}} = 7.6$  Hz, 1 H, ArH, **7**), 7.72 (d,  $J_{\text{HH}} = 7.6$  Hz, 1 H, ArH, **9**), 7.68 (d,  $J_{\text{HH}} = 8.8$  Hz, 1 H, ArH, **9**), 7.64 (d,  $J_{\text{HH}} = 7.2$  Hz, 1 H, ArH, **7**), 7.50 (t,  $J_{\text{HH}} = 8.0$  Hz, 1 H, ArH, **9**), 7.41–7.30 (m, 5 H, ArH, **7** (3 H) and **9** (2 H)), 7.21 (t,  $J_{\text{HH}} = 8.0$  Hz, 1 H, ArH, **9**), 7.13–7.05 (m, 4 H, ArH, **7** (2 H) + **9** (2 H)), 6.96 (t,  $J_{\text{HH}} = 7.6$  Hz, 1 H, **7**), 6.92 (t,  $J_{\text{HH}} = 8.0$  Hz, 1 H, ArH, **9**), 6.85 (d,  $J_{\text{HH}} = 8.0$  Hz, 1 H, ArH, **7**), 6.55 (s, 1 H, NH, **9**), 6.48 (s, 1 H, NH, **7**), 6.30 (d,  $J_{\text{HH}} = 5.2$  Hz, 1 H, ArH, **9**), 6.01 (d,  $J_{\text{HH}} = 7.6$  Hz, 1 H, ArH, **7**), 5.64 (br, 2 H, CH<sub>2</sub>, **7**), 5.57 (br, 2 H, CH<sub>2</sub>, **9**), 2.20 (s, 6 H, CH<sub>3</sub>, **7** (3 H) and **9** (3 H)). <sup>19</sup>F NMR (CDCl<sub>3</sub>, 376.5 MHz):  $\delta$  –61.37 (**7**), –61.40 (**9**), –61.47 (**9**), –61.54 (**7**). Anal. Calcd for C<sub>23</sub>H<sub>18</sub>F<sub>6</sub>N<sub>4</sub>O<sub>2</sub>Pd (MW = 602.833 g/mol): C, 45.83; H, 3.01; N, 9.29. Found: C, 45.88; H, 2.63; N, 9.64. IR (KBr, cm<sup>-1</sup>):  $\nu$ (NH) 3434 (w);  $\nu_{\text{a}}(\text{OCO})$  1652 (s);  $\nu(\text{C}=\text{N})$  1607 (m);  $\nu_{\text{s}}(\text{OCO})$  1311 (m). ESI-MS ( $m/z$ ): calcd for C<sub>21</sub>H<sub>15</sub>F<sub>6</sub>N<sub>4</sub>Pd [M – OC(O)Me + MeCN]<sup>+</sup> 584.0501, found 584.0512; calcd for C<sub>21</sub>H<sub>15</sub>F<sub>6</sub>N<sub>4</sub>Pd [M – OC(O)Me]<sup>+</sup> 543.0236, found 543.0244.

**Data for 8** Yield = 88% (129 mg, 0.200 mmol). M.p. 240.0 °C (decomp.). <sup>1</sup>H NMR (CDCl<sub>3</sub>, 400 MHz):  $\delta$  10.03 (s, 1 H, NH), 8.19 (d,  $J_{\text{HH}} = 5.2$  Hz, 1 H, ArH), 8.02 (d,  $J_{\text{HH}} = 7.6$  Hz, 1 H, ArH), 7.63 (d,  $J_{\text{HH}} = 7.6$  Hz, 1 H, ArH), 7.38–7.32 (m, 2 H, ArH), 7.27 (m, 2 H, ArH), 7.16–7.11 (m, 2 H, ArH), 6.93 (t,  $J_{\text{HH}} = 7.8$  Hz, 1 H, ArH), 6.81 (d,  $J_{\text{HH}} = 7.6$  Hz, 1 H, ArH), 6.44 (s, 1 H, NH), 6.38 (br, 2 H, CH<sub>2</sub>), 1.14 (s, 9 H, C(CH<sub>3</sub>)<sub>3</sub>). <sup>13</sup>C{<sup>1</sup>H} NMR (CDCl<sub>3</sub>, 100.5 MHz):  $\delta$  186.3, 161.2, 147.1, 146.8, 140.1, 137.3, 135.0, 133.6, 133.0, 131.5, 129.5 (q,  $^2J_{\text{CF}} = 29.8$  Hz), 129.2, 128.3, 127.4 (q,  $^3J_{\text{CF}} = 4.8$  Hz), 124.1, 123.3 (each q,  $^1J_{\text{CF}} = 273.6$  Hz), 122.8 (q,  $^3J_{\text{CF}} = 3.8$  Hz), 122.1, 120.2, 119.6, 114.0 (q,  $^2J_{\text{CF}} = 28.8$  Hz), 60.2, 39.8, 28.5. <sup>19</sup>F NMR (CDCl<sub>3</sub>, 376.5 MHz):  $\delta$  –61.33, –61.52. Anal. Calcd for C<sub>26</sub>H<sub>24</sub>N<sub>4</sub>F<sub>6</sub>O<sub>2</sub>Pd (MW = 644.914 g/mol): C, 48.42; H, 3.75; N, 8.69. Found: C, 48.72; H, 3.60; N, 8.73. IR (KBr, cm<sup>-1</sup>):  $\nu$ (NH) 3438 (w);  $\nu_{\text{a}}(\text{OCO})$  1653 (s);  $\nu(\text{C}=\text{N})$  1605 (m);  $\nu_{\text{s}}(\text{OCO})$  1311 (m). ESI-MS ( $m/z$ ): calcd for C<sub>21</sub>H<sub>15</sub>F<sub>6</sub>N<sub>4</sub>Pd [M – OC(O)<sup>t</sup>Bu +

MeCN ]<sup>+</sup> 584.0501, found 584.0523; calcd for C<sub>21</sub>H<sub>15</sub>F<sub>6</sub>N<sub>4</sub>Pd [M – OC(O)<sup>t</sup>Bu]<sup>+</sup> 543.0236, found 543.0254.

### Procedure for pure **7**

A 25 mL RB was charged with the guanidine, **2** (100 mg, 0.228 mmol) and Pd(OAc)<sub>2</sub> (51.2, 0.228 mmol) and the resulting heterogeneous mixture dispersed in a freshly distilled toluene (10 mL). The contents in the RB flask were stirred at RT for 6 h. The complete consumption of the guanidine was verified by TLC using ethyl acetate/*n*-hexane (1/1, v/v) mixture as the eluent. The reaction mixture was filtered through a Whatman filter paper and stored at RT for one week to afford **7** as white solid in 86% (118 mg, 0.195 mmol) yield.

**Data for 7** Yield = 86% (118 mg, 0.196 mmol). M.p. 249.0 °C (decomp.). <sup>1</sup>H NMR (CDCl<sub>3</sub>, 400 MHz): δ 9.80 (s, 1 H, NH), 8.23 (d, *J*<sub>HH</sub> = 5.6 Hz, 1 H, ArH), 7.90 (d, *J*<sub>HH</sub> = 7.2 Hz, 1 H, ArH), 7.64 (d, *J*<sub>HH</sub> = 7.2 Hz, 1 H, ArH), 7.39–7.30 (m, 3 H, ArH), 7.14–7.08 (m, 2 H, ArH), 6.95 (t, *J*<sub>HH</sub> = 7.6 Hz, 1 H, ArH), 6.85 (d, *J*<sub>HH</sub> = 8.0 Hz, 1 H, ArH), 6.47 (s, 1 H, NH), 6.01 (d, *J*<sub>HH</sub> = 7.6 Hz, 1 H, ArH), 5.63 (br, 2 H, CH<sub>2</sub>), 2.20 (s, 3 H, CH<sub>3</sub>). <sup>19</sup>F NMR (CDCl<sub>3</sub>, 376.5 MHz): δ –61.28, –61.45. Anal. Calcd for C<sub>23</sub>H<sub>18</sub>F<sub>6</sub>N<sub>4</sub>O<sub>2</sub>Pd (MW = 602.833 g/mol): C, 45.83; H, 3.01; N, 9.29. Found: C, 45.88; H, 2.63; N, 9.64. IR (KBr, cm<sup>-1</sup>): ν(NH) 3434 (w); ν<sub>a</sub>(OCO) 1654 (s); ν(C=N) 1617 (m); ν<sub>s</sub>(OCO) 1314 (m).

**Complexes 10 and 11** A 25 mL RB was charged with **3** (104 mg, 0.190 mmol) or **6** (125 mg, 0.190 mmol) and PPh<sub>3</sub> (50.0 mg, 0.190 mmol) separately, dissolved the mixture in CH<sub>2</sub>Cl<sub>2</sub> (10 mL) and set to stir for 24 h at RT. The reaction mixture was filtered through a Whatman filter paper, the filtrate layered with toluene and stored at RT for one week to afford **10** and **11** as colorless crystals.

**Data of 10** Yield = 82% (126 mg, 0.155 mmol). M.p. 203.9 °C (decomp.). <sup>1</sup>H NMR (CDCl<sub>3</sub>, 400 MHz): δ 10.15 (s, 1 H, NH), 7.67–7.61 (m, 8 H, ArH), 7.46 (dt,  $J_{\text{HH}} = 7.6$  Hz,  $J_{\text{HH}} = 1.6$  Hz, 3 H, ArH), 7.39–7.35 (m, 7 H, ArH), 7.32–7.30 (m, 1 H, ArH), 7.23–7.19 (m, 3 H, ArH), 6.95 (s, 1 H, NH), 6.72–6.69 (m, 1 H, ArH), 6.58–6.54 (m, 2 H, ArH), 6.03 (t,  $J_{\text{HH}} = 7.8$  Hz, 1 H, ArH), 5.61 (d,  $J_{\text{HH}} = 2.0$  Hz, 2 H, CH<sub>2</sub>), 2.36, 1.75 (each s, 2 × 3 H, CH<sub>3</sub>). <sup>13</sup>C{<sup>1</sup>H} NMR (CDCl<sub>3</sub>, 100.5 MHz): δ 164.2, 161.6 (q,  $^2J_{\text{CF}} = 32.7$  Hz), 149.5, 149.0, 138.8, 138.6, 138.4, 136.5, 136.1, 135.4, 135.0, 134.9, 131.6, 131.4, 130.4, 129.9, 129.0, 128.9, 128.0, 127.6, 127.3, 127.0, 123.6, 122.5, 122.3, 121.8, 117.3 (q,  $^1J_{\text{CF}} = 295.4$  Hz), 58.5, 18.2, 17.9. <sup>19</sup>F NMR (CDCl<sub>3</sub>, 376.5 MHz): δ -74.99. <sup>31</sup>P{<sup>1</sup>H} NMR (CDCl<sub>3</sub>, 161.8 MHz): δ 35.91. Anal. Calcd for C<sub>41</sub>H<sub>36</sub>N<sub>4</sub>F<sub>3</sub>O<sub>2</sub>PPd (MW = 811.154 g/mol): C, 60.71; H, 4.47; N, 6.91. Found: C, 60.72; H, 4.39; N, 6.88. IR (KBr, cm<sup>-1</sup>): ν(NH) 3412 (w); ν<sub>a</sub>(OCO) 1685 (s); ν(C=N) 1620 (m); ν<sub>s</sub>(OCO) 1436 (m). Λ<sub>M</sub> (Ω<sup>-1</sup> cm<sup>2</sup> mol<sup>-1</sup>, MeCN) = 72.36 (10<sup>-3</sup> M).

**Data of 11** Yield = 85% (148 mg, 0.161 mmol). M.p. 184.7 °C (decomp.). <sup>1</sup>H NMR (CDCl<sub>3</sub>, 400 MHz): δ 10.81 (s, 1 H, NH), 7.82–7.79 (m, 2 H, ArH), 7.74–7.62 (m, 9 H, ArH), 7.57–7.53 (m, 1 H, ArH), 7.50–7.47 (m, 3 H, ArH), 7.39 (dt,  $J_{\text{HH}} = 7.4$  Hz,  $J_{\text{HH}} = 2.0$  Hz, 6 H, ArH), 7.24 (d,  $J_{\text{HH}} = 5.6$  Hz, 1 H, ArH), 6.94–6.88 (m, 2 H, ArH (1 H), NH (1 H)), 6.78 (d,  $J_{\text{HH}} = 2.4$  Hz, 1 H, ArH), 6.73 (t,  $J_{\text{HH}} = 6.6$  Hz, 1 H, ArH), 6.13 (t,  $J_{\text{HH}} = 7.6$  Hz, 1 H, ArH), 5.75 (br, 2 H, CH<sub>2</sub>). <sup>19</sup>F NMR (CDCl<sub>3</sub>, 376.5 MHz): δ -60.73, -61.14, -75.04. <sup>31</sup>P{<sup>1</sup>H} NMR (CDCl<sub>3</sub>, 161.8 MHz): δ 36.34. Anal. Calcd for C<sub>41</sub>H<sub>30</sub>N<sub>4</sub>F<sub>9</sub>O<sub>2</sub>PPd (MW = 919.096 g/mol): C, 53.58; H, 3.29; N, 6.10; Found: C, 53.81; H, 3.05; N, 6.19. IR (KBr, cm<sup>-1</sup>): ν(NH) 3437 (w); ν<sub>a</sub>(OCO) 1683 (s); ν(C=N) 1598 (m); ν<sub>s</sub>(OCO) 1420 (m). Λ<sub>M</sub> (Ω<sup>-1</sup> cm<sup>2</sup> mol<sup>-1</sup>, MeCN) = 75.84 (10<sup>-3</sup> M).

**Complex 12** In a 5 mm Wilmad NMR tube fitted with a w/J Young valve, complex **7** (22.9 mg, 0.038 mmol) and PPh<sub>3</sub> (10.0 mg, 0.038 mmol) were added and dissolved in CDCl<sub>3</sub> (0.6 mL). The



contents in the NMR tube was shaken well for about 5 min and  $^1\text{H}$ ,  $^{19}\text{F}$  and  $^{31}\text{P}\{^1\text{H}\}$  NMR spectra were recorded. Complex **12** could not be isolated in solid form as it reverts back to the respective starting materials during crystallization. Hence, **12** was characterized only by  $^1\text{H}$ ,  $^{19}\text{F}$  and  $^{31}\text{P}\{^1\text{H}\}$  NMR spectroscopies.

**Data of 12**  $^1\text{H}$  NMR ( $\text{CDCl}_3$ , 400 MHz):  $\delta$  7.74–7.65 (m, 3 H, ArH), 7.61–7.50 (m, 9 H, ArH (8 H) + NH (1 H)), 7.44–7.41 (m, 3 H, ArH), 7.37–7.34 (m, 8 H, ArH (7 H) + NH (1 H)), 7.25 (d,  $J_{\text{HH}} = 5.2$  Hz, 1 H, ArH), 6.91 (d,  $J_{\text{HH}} = 7.6$  Hz, 1 H, ArH), 6.88 (d,  $J_{\text{HH}} = 8.0$  Hz, 1 H, ArH), 6.70 (t,  $J_{\text{HH}} = 6.0$  Hz, 1 H, ArH), 6.08 (t,  $J_{\text{HH}} = 7.6$  Hz, 1 H, ArH), 5.76 (s, 2 H,  $\text{CH}_2$ ), 1.89 (s, 3 H,  $\text{CH}_3$ ).  $^{19}\text{F}$  NMR ( $\text{CDCl}_3$ , 376.5 MHz):  $\delta$  -60.72, -61.40.  $^{31}\text{P}\{^1\text{H}\}$  NMR ( $\text{CDCl}_3$ , 161.8 MHz):  $\delta$  34.71.

**Complex 13** A 25 mL RB was charged with 2,6-xylylisocyanide (20.0 mg, 0.152 mmol) and **3** (83.4 mg, 0.152 mmol) the resulting mixture dissolved in  $\text{CH}_2\text{Cl}_2$  (10 mL) and set to stir at RT for 24 h. The reaction mixture was filtered through a Whatman filter paper, the filtrate layered with toluene and stored at RT for one week to afford **13** as light pink crystals, respectively.

**Data of 13** Yield = 80% (82.7 mg, 0.122 mmol). M.p. 126.6 °C (decomp.).  $^1\text{H}$  NMR ( $\text{CDCl}_3$ , 400 MHz):  $\delta$  10.37 (s, 1 H, NH), 8.51 (d,  $J_{\text{HH}} = 5.6$  Hz, 1 H, ArH), 7.98–7.90 (m, 2 H, ArH), 7.56 (d,  $J_{\text{HH}} = 7.6$  Hz, 1 H, ArH), 7.39–7.34 (m, 4 H, ArH), 7.31–7.29 (m, 2 H, ArH), 7.24 (br s, 1 H, ArH), 7.17 (d,  $J_{\text{HH}} = 7.6$  Hz, 1 H, ArH), 6.90 (d,  $J_{\text{HH}} = 6.8$  Hz, 1 H, ArH), 6.78 (s, 1 H, NH), 6.66 (t,  $J_{\text{HH}} = 7.6$  Hz, 1 H, ArH), 5.82 (s, 2 H,  $\text{CH}_2$ ), 2.56 (s,  $2 \times 3$  H,  $\text{CH}_3$ ), 2.36, 1.69 (each s,  $2 \times 3$  H,  $\text{CH}_3$ ).  $^{13}\text{C}\{^1\text{H}\}$  NMR ( $\text{CDCl}_3$ , 100.5 MHz):  $\delta$  163.4, 161.6 (q,  $^2J_{\text{CF}} = 33.4$  Hz), 148.3, 147.4, 141.3, 139.2, 137.0, 135.9, 135.3, 135.0, 131.8, 130.7, 129.1, 128.8, 128.6, 128.4, 127.9, 125.6, 123.5, 123.4, 123.3, 121.8, 117.4 (q,  $^1J_{\text{CF}} = 296.1$  Hz), 60.5, 19.1, 18.0, 17.8.  $^{19}\text{F}$  NMR ( $\text{CDCl}_3$ , 376.5 MHz):  $\delta$  -75.08. Anal. Calcd for  $\text{C}_{32}\text{H}_{30}\text{N}_5\text{F}_3\text{O}_2\text{Pd}$  (MW = 680.040 g/mol): C,

56.52; H, 4.45; N, 10.30. Found: C, 56.76; H, 4.51; N, 10.37. IR (KBr,  $\text{cm}^{-1}$ ):  $\nu(\text{NH})$  3411 (w);  $\nu(\text{C}\equiv\text{N})$  2175 (s);  $\nu_a(\text{OCO})$  1674 (s);  $\nu(\text{C}=\text{N})$  1633 (m);  $\nu_s(\text{OCO})$  1445 (m).  $\Lambda_M$  ( $\Omega^{-1} \text{cm}^2 \text{mol}^{-1}$ , MeCN) = 59.29 ( $10^{-3} \text{M}$ ).

**Complexes 14** A 25 mL RB was charged with 2,6-xylylisocyanide (20.0 mg, 0.152 mmol) and **6** (99.8 mg, 0.152 mmol), the resulting mixture dissolved in  $\text{CH}_2\text{Cl}_2$  (10 mL) and set to stir at RT for 24 h. The reaction mixture was filtered through a Whatman filter paper, layered with toluene and stored at RT for one week to afford **14** as light pink crystals.

**Data of 14** Yield = 81% (97.0 mg, 0.123 mmol). M.p. 179.8 °C (decomp.).  $^1\text{H}$  NMR ( $\text{CDCl}_3$ , 400 MHz):  $\delta$  10.83 (s, 1 H, *NH*), 8.51 (d,  $J_{\text{HH}} = 4.4$  Hz, 1 H, *ArH*), 7.95 (br, 2 H, *ArH*), 7.89 (d,  $J_{\text{HH}} = 7.2$  Hz, 1 H, *ArH*), 7.81 (d,  $J_{\text{HH}} = 7.2$  Hz, 1 H, *ArH*), 7.71 (t,  $J_{\text{HH}} = 6.8$  Hz, 1 H, *ArH*), 7.64 (d,  $J_{\text{HH}} = 7.2$  Hz, 1 H, *ArH*), 7.58 (t,  $J_{\text{HH}} = 7.0$  Hz, 1 H, *ArH*), 7.39–7.33 (m, 3 H, *ArH*), 7.27–7.25 (m, 2 H, *ArH*), 6.92 (s, 1 H, *NH*), 6.82 (t,  $J_{\text{HH}} = 7.2$  Hz, 1 H, *ArH*), 5.83 (br, 2 H, *CH*<sub>2</sub>), 2.56 (s, 2  $\times$  3 H, *CH*<sub>3</sub>).  $^{13}\text{C}\{^1\text{H}\}$  NMR ( $\text{CDCl}_3$ , 100.5 MHz):  $\delta$  163.0, 161.6 (q,  $^2J_{\text{CF}} = 32.7$  Hz), 148.5, 147.7, 147.2, 139.5, 135.9, 134.1, 133.9, 133.7, 132.3, 131.0, 130.0 (q,  $^2J_{\text{CF}} = 30.4$  Hz), 129.4, 128.8, 128.6, 127.8 (q,  $^3J_{\text{CF}} = 4.3$  Hz), 125.6 (br), 124.3 (q,  $^3J_{\text{CF}} = 5.1$  Hz), 124.0 (q,  $^1J_{\text{CF}} = 274.3$  Hz), 123.8, 123.2 (q,  $^1J_{\text{CF}} = 272.9$  Hz), 123.1, 121.4, 118.7, 116.1 (q,  $^2J_{\text{CF}} = 29.0$  Hz), 60.7, 19.1.  $^{19}\text{F}$  NMR ( $\text{CDCl}_3$ , 376.5 MHz):  $\delta$  -61.16, -61.58, -75.18. Anal. Calcd for  $\text{C}_{32}\text{H}_{24}\text{N}_5\text{F}_9\text{O}_2\text{Pd}$  (MW = 787.983 g/mol): C, 48.78; H, 3.07; N, 8.89. Found: C, 48.84; H, 3.05; N, 9.20. IR (KBr,  $\text{cm}^{-1}$ ):  $\nu(\text{NH})$  3447 (w),  $\nu(\text{C}\equiv\text{N})$  2188 (m),  $\nu_a(\text{OCO})$  1680 (s);  $\nu(\text{C}=\text{N})$  1604 (m);  $\nu_s(\text{OCO})$  1455 (m).  $\Lambda_M$  ( $\Omega^{-1} \text{cm}^2 \text{mol}^{-1}$ , MeCN) = 57.17 ( $10^{-3} \text{M}$ ).

**Complexes 15** A 25 mL RB was charged with 2,6-xylylisocyanide (20.0 mg, 0.152 mmol), **4** (78.7 mg, 0.152 mmol) or **5** (88.6 mg, 0.152 mmol) separately, the resulting mixture dissolved in  $\text{CH}_2\text{Cl}_2$  (10 mL) and set to stir at RT for 24 h. The reaction mixture was filtered through a Whatman filter

paper, the filtrate layered with toluene and stored at RT for three weeks to afford **15** as dark red crystals suitable for SCXRD. Yields = 77% (68.8 mg, 0.118 mmol) from **4** and 81% (72.3 mg, 0.124 mmol) from **5**.

#### ***Alternate Method for 15***

A 25 mL RB was charged with **4** (50.0 mg, 0.096 mmol) and <sup>t</sup>BuOK (43.0 mg, 0.384 mmol) in CHCl<sub>3</sub> (10 mL) and the resulting mixture stirred at RT for 5 min. To this solution 2,6-xylylisocyanide (15.1 mg 0.115 mmol) was added and stirred for 24 h. During the course of the reaction, color of the solution changed from yellow to dark red indicating the formation of oxygenated product, **15**. The reaction mixture was filtered through a Whatman filter paper and the filtrate evaporated under vacuum to afford **15** in 82% (46.1 mg, 0.079 mmol) yield.

**Data of 15** M.p. 226.4 °C (decomp.). <sup>1</sup>H NMR (CDCl<sub>3</sub>, 400 MHz): δ 10.69 (s, 1 H, NH), 8.54 (d, *J*<sub>HH</sub> = 8.0 Hz, 1 H, ArH), 8.45 (d, *J*<sub>HH</sub> = 7.2 Hz, 1 H, ArH), 8.31 (d, *J*<sub>HH</sub> = 7.6 Hz, 1 H, ArH), 8.04 (dt, *J*<sub>HH</sub> = 7.6 Hz; 1.2 Hz, 1 H, ArH), 7.53 (t, *J*<sub>HH</sub> = 6.0 Hz, 1 H, ArH), 7.42 (d, *J*<sub>HH</sub> = 7.2 Hz, 1 H, ArH), 7.35 (t, *J*<sub>HH</sub> = 7.6 Hz, 1 H, ArH), 7.24–7.16 (m, 4 H, ArH), 6.98 (d, *J*<sub>HH</sub> = 7.2 Hz, 1 H, ArH), 6.92 (t, *J*<sub>HH</sub> = 7.2 Hz, 1 H, ArH), 6.53 (t, *J*<sub>HH</sub> = 7.4 Hz, 1 H, ArH), 2.57 (s, 2 × 3 H, CH<sub>3</sub>), 2.43, 2.38 (each s, 2 × 3 H, CH<sub>3</sub>). <sup>13</sup>C{<sup>1</sup>H} NMR (CDCl<sub>3</sub>, 100.5 MHz): δ 172.6, 154.8, 148.3, 143.7, 141.4, 140.2, 140.1, 139.7, 135.9, 134.7, 133.2, 130.3, 129.8, 128.6, 128.5, 128.1, 127.8, 126.9, 125.8, 122.8, 121.5, 120.9, 21.9, 19.2, 18.9. Anal. Calcd for C<sub>30</sub>H<sub>27</sub>N<sub>5</sub>OPd·¼ H<sub>2</sub>O (MW = 580.000 + 4.504 g/mol): C, 61.65; H, 4.74; N, 11.98. Found: C, 61.70; H, 4.72; N, 12.17. IR (KBr, cm<sup>-1</sup>): ν(NH) 3425 (w); ν(C≡N) 2160 (s); ν(C=O) 1639 (s); ν(C=N) 1530 (s).

**Complexes 16** A 25 mL RB was charged with 2,6-xylylisocyanide (20.0 mg, 0.152 mmol) and **7** (91.6 mg, 0.152 mmol), the resulting mixture dissolved in CH<sub>2</sub>Cl<sub>2</sub> (10 mL) and set to stir at RT

for 24 h. The reaction mixture was filtered through a Whatman filter paper, layered with toluene and stored at RT for three weeks to afford **16** as red crystals suitable for SCXRD.

**Data of 16** Yield = 78% (81.6 mg, 0.119 mmol). M.p. 242.3 °C (decomp.). <sup>1</sup>H NMR (CDCl<sub>3</sub>, 400 MHz): δ 11.10 (s, 1 H, NH), 8.41 (d, *J*<sub>HH</sub> = 4.4 Hz, 1 H, ArH), 8.29 (d, *J*<sub>HH</sub> = 7.6 Hz, 1 H, ArH), 8.18 (d, *J*<sub>HH</sub> = 8.4 Hz, 1 H, ArH), 7.90 (t, *J*<sub>HH</sub> = 7.6 Hz, 1 H, ArH), 7.71 (d, *J*<sub>HH</sub> = 7.6 Hz, 1 H, ArH), 7.56 (d, *J*<sub>HH</sub> = 8.0 Hz, 1 H, ArH), 7.49 (t, *J*<sub>HH</sub> = 7.0 Hz, 2 H, ArH), 7.39–7.35 (m, 2 H, ArH), 7.24 (d, *J*<sub>HH</sub> = 7.6 Hz, 2 H, ArH), 7.10 (t, *J*<sub>HH</sub> = 7.6 Hz, 1 H, ArH), 6.62 (t, *J*<sub>HH</sub> = 7.4 Hz, 1 H, ArH), 2.57 (s, 2 × 3 H, CH<sub>3</sub>). <sup>19</sup>F NMR (CDCl<sub>3</sub>, 376.5 MHz): δ –59.98, –61.34. Anal. Calcd for C<sub>30</sub>H<sub>21</sub>N<sub>5</sub>F<sub>6</sub>OPd (MW = 687.942 g/mol): C, 52.38; H, 3.08; N, 10.18. Found: C, 52.55; H, 3.23; N, 10.47. IR (KBr, cm<sup>-1</sup>): ν(NH) 3010 (br w), ν(C≡N) 2174 (m), ν(C=O) 1643 (m), ν(C=N) 1517 (s).

**Complexes 17** A 25 mL RB was charged with 2,6-xylylisocyanide (20.0 mg, 0.152 mmol) and **8** (98.0 mg, 0.152 mmol), the resulting mixture dissolved in CH<sub>2</sub>Cl<sub>2</sub> (10 mL) and set to stir at RT for 24 h. The reaction mixture was filtered through a Whatman filter paper, layered with toluene and stored at RT for three days to afford **17** as orange crystals suitable for SCXRD.

**Data of 17:** Yield = 76% (77.9 mg, 0.116 mmol). M.p. 198.5 °C (decomp.). <sup>1</sup>H NMR (CDCl<sub>3</sub>, 400 MHz): δ 8.52 (d, *J*<sub>HH</sub> = 5.6 Hz, 1 H, ArH), 7.83 (t, *J*<sub>HH</sub> = 8.4 Hz, 2 H, ArH), 7.60 (d, *J*<sub>HH</sub> = 7.6 Hz, 2 H, ArH), 7.43 (t, *J*<sub>HH</sub> = 7.6 Hz, 1 H, ArH), 7.33 (t, *J*<sub>HH</sub> = 7.6 Hz, 1 H, ArH), 7.28–7.23 (m, 2 H, ArH), 7.20 (d, *J*<sub>HH</sub> = 7.6 Hz, 2 H, ArH), 7.04 (d, *J*<sub>HH</sub> = 8.0 Hz, 1 H, ArH), 7.00 (t, *J*<sub>HH</sub> = 7.6 Hz, 1 H, ArH), 6.86 (br, 1 H, NH), 6.59 (t, *J*<sub>HH</sub> = 7.6 Hz, 1 H, ArH), 5.55 (s, 2 H, CH<sub>2</sub>), 2.53 (s, 6 H, 2 × CH<sub>3</sub>). <sup>13</sup>C{<sup>1</sup>H} NMR (CDCl<sub>3</sub>, 100.5 MHz): δ 165.9, 149.6 (br), 148.6, 147.2, 146.5, 138.3, 138.0, 135.7, 132.6, 130.3, 129.1, 128.6, 128.3, 127.6, 126.9, 126.7 (q, <sup>3</sup>*J*<sub>CF</sub> = 5.8 Hz), 126.3, 125.4, 124.9 (q, <sup>2</sup>*J*<sub>CF</sub> = 28.3 Hz), 124.8, 124.7 (each q, <sup>1</sup>*J*<sub>CF</sub> = 273.6 Hz), 123.7 (q, <sup>3</sup>*J*<sub>CF</sub>

= 5.8 Hz), 122.7, 121.9, 121.0, 118.4, 113.8 (q,  $^2J_{CF} = 29.0$  Hz), 62.1, 19.1.  $^{19}\text{F}$  NMR ( $\text{CDCl}_3$ , 376.5 MHz):  $\delta$  -61.47, -61.84. Anal. Calcd for  $\text{C}_{30}\text{H}_{23}\text{N}_5\text{F}_6\text{Pd}$  (MW = 673.959 g/mol): C, 53.46; H, 3.44; N, 10.39. Found: C, 53.19; H, 3.16; N, 10.63. IR (KBr,  $\text{cm}^{-1}$ ):  $\nu(\text{NH})$  3425 (w);  $\nu(\text{C}\equiv\text{N})$  2175 (m);  $\nu(\text{C}=\text{N})$  1523 (m).

#### **General procedure for cycloisomerization of 4-pentynoic acid**

In a 5 mm Wilmad NMR tube fitted with a w/J Young valve, 4-pentynoic acid (6 mg, 0.061 mmol) was dissolved in 0.6 mL  $\text{CDCl}_3$ . To this solution, 1 mol% catalyst solution of **3–8** prepared in  $\text{CDCl}_3$  was added and the NMR tube was shaken briefly. The progress of the reaction involving 4-pentynoic acid (7.00 mg, 0.071 mmol) and **8** (0.46 mg, 1 mol%) in  $\text{CDCl}_3$  was monitored by  $^1\text{H}$  NMR spectroscopy at regular time interval. The signals of  $\text{CH}_2$  protons of the product slowly emerged while corresponding signals of 4-pentynoic acid disappeared completely after 12 h.

**Table S1** Crystallographic data for **3**·½ toluene, **5**·½ toluene·½ pivalic acid and **6**.

|                                                                  | <b>3</b> ·½ toluene                                                               | <b>5</b> ·½ toluene·½ pivalic acid                                 | <b>6</b>                                                                        |
|------------------------------------------------------------------|-----------------------------------------------------------------------------------|--------------------------------------------------------------------|---------------------------------------------------------------------------------|
| Formula                                                          | C <sub>26.5</sub> H <sub>25</sub> F <sub>3</sub> N <sub>4</sub> O <sub>2</sub> Pd | C <sub>32</sub> H <sub>38.5</sub> N <sub>4</sub> O <sub>3</sub> Pd | C <sub>23</sub> H <sub>15</sub> F <sub>9</sub> N <sub>4</sub> O <sub>2</sub> Pd |
| Fw                                                               | 594.90                                                                            | 633.57                                                             | 656.79                                                                          |
| Temperature (K)                                                  | 293(2)                                                                            | 293(2)                                                             | 293(2)                                                                          |
| Wavelength (Å)                                                   | 0.71073                                                                           | 0.71073                                                            | 0.71073                                                                         |
| Crystal system                                                   | triclinic                                                                         | monoclinic                                                         | monoclinic                                                                      |
| Space group                                                      | P-1                                                                               | P2 <sub>1</sub> /c                                                 | P2 <sub>1</sub> /c                                                              |
| <i>a</i> (Å)                                                     | 11.2472(5)                                                                        | 11.8433(3)                                                         | 13.8775(5)                                                                      |
| <i>b</i> (Å)                                                     | 11.6670(6)                                                                        | 18.0831(5)                                                         | 22.4973(9)                                                                      |
| <i>c</i> (Å)                                                     | 20.8033(6)                                                                        | 29.6288(9)                                                         | 16.1759(6)                                                                      |
| $\alpha$ (deg)                                                   | 99.053(3)                                                                         | 90                                                                 | 90                                                                              |
| $\beta$ (deg)                                                    | 99.487(3)                                                                         | 90.847(2)                                                          | 96.334(4)                                                                       |
| $\gamma$ (deg)                                                   | 97.943(4)                                                                         | 90                                                                 | 90                                                                              |
| Volume (Å <sup>3</sup> )                                         | 2620.9(2)                                                                         | 6344.7(3)                                                          | 5019.4(3)                                                                       |
| <i>Z</i>                                                         | 4                                                                                 | 8                                                                  | 8                                                                               |
| $\rho_{\text{calcd}}$ (Mg/m <sup>3</sup> )                       | 1.508                                                                             | 1.327                                                              | 1.738                                                                           |
| $\mu$ (Mo K $\alpha$ ) (mm <sup>-1</sup> )                       | 0.760                                                                             | 0.621                                                              | 0.835                                                                           |
| <i>F</i> (000)                                                   | 1204.0                                                                            | 2628.0                                                             | 2592.0                                                                          |
| 2 $\theta$ range (deg)                                           | 7.088 to 52.742                                                                   | 6.828 to 49.998                                                    | 6.806 to 52.744                                                                 |
| No. of reflns collected                                          | 10696                                                                             | 81137                                                              | 69215                                                                           |
| No. of reflns used                                               | 10696                                                                             | 11155                                                              | 12245                                                                           |
| Parameters                                                       | 657                                                                               | 673                                                                | 758                                                                             |
| R <sub>1</sub> [ <i>I</i> >2 $\sigma$ ( <i>I</i> )] <sup>a</sup> | 0.0782                                                                            | 0.0555                                                             | 0.0501                                                                          |
| wR <sub>2</sub> (all reflns) <sup>b</sup>                        | 0.2199                                                                            | 0.1204                                                             | 0.1126                                                                          |
| GooF on <i>F</i> <sup>2 c</sup>                                  | 1.053                                                                             | 1.0318                                                             | 1.036                                                                           |
| Largest diff. peak and hole, (e·Å <sup>-3</sup> )                | 1.91/-1.07                                                                        | 0.50/-0.48                                                         | 0.56/-0.64                                                                      |

$$^a R_1 = \frac{\sum ||F_o| - |F_c||}{\sum |F_o|}; ^b wR_2 = \left\{ \frac{\sum [w(F_o^2 - F_c^2)^2]}{\sum [w(F_o^2)^2]} \right\}^{1/2};$$

$$^c S = \left\{ \frac{\sum [w(F_o^2 - F_c^2)^2]}{(n-p)} \right\}^{1/2}$$

**Table S2** Crystallographic data for **7**, **10** and **14**.

|                                                                  | <b>7</b>                                                                                      | <b>10</b>                                                                        | <b>14</b>                                                                       |
|------------------------------------------------------------------|-----------------------------------------------------------------------------------------------|----------------------------------------------------------------------------------|---------------------------------------------------------------------------------|
| Formula                                                          | C <sub>46</sub> H <sub>36</sub> F <sub>12</sub> N <sub>8</sub> O <sub>4</sub> Pd <sub>2</sub> | C <sub>48</sub> H <sub>44</sub> F <sub>3</sub> N <sub>4</sub> O <sub>2</sub> PPd | C <sub>32</sub> H <sub>24</sub> F <sub>9</sub> N <sub>5</sub> O <sub>2</sub> Pd |
| Fw                                                               | 1205.63                                                                                       | 903.24                                                                           | 787.96                                                                          |
| Temperature (K)                                                  | 293(2)                                                                                        | 293(2)                                                                           | 293(2)                                                                          |
| Wavelength (Å)                                                   | 0.71073                                                                                       | 0.71073                                                                          | 0.71073                                                                         |
| Crystal system                                                   | monoclinic                                                                                    | triclinic                                                                        | monoclinic                                                                      |
| Space group                                                      | P2 <sub>1</sub> /c                                                                            | P-1                                                                              | P2 <sub>1</sub> /c                                                              |
| <i>a</i> (Å)                                                     | 14.2253(3)                                                                                    | 10.8143(3)                                                                       | 8.2270(3)                                                                       |
| <i>b</i> (Å)                                                     | 19.3693(3)                                                                                    | 14.5146(3)                                                                       | 26.1341(7)                                                                      |
| <i>c</i> (Å)                                                     | 17.4110(3)                                                                                    | 14.5400(4)                                                                       | 15.2245(4)                                                                      |
| <i>α</i> (deg)                                                   | 90                                                                                            | 94.143(2)                                                                        | 90                                                                              |
| <i>β</i> (deg)                                                   | 93.317(2)                                                                                     | 109.681(2)                                                                       | 98.085(3)                                                                       |
| <i>γ</i> (deg)                                                   | 90                                                                                            | 90.228(2)                                                                        | 90                                                                              |
| Volume (Å <sup>3</sup> )                                         | 4789.29(15)                                                                                   | 2142.36(10)                                                                      | 3240.81(17)                                                                     |
| <i>Z</i>                                                         | 4                                                                                             | 2                                                                                | 4                                                                               |
| $\rho_{\text{calcd}}$ (Mg/m <sup>3</sup> )                       | 1.672                                                                                         | 1.400                                                                            | 1.615                                                                           |
| $\mu$ (Mo K $\alpha$ ) (mm <sup>-1</sup> )                       | 0.850                                                                                         | 0.527                                                                            | 0.663                                                                           |
| <i>F</i> (000)                                                   | 2400.0                                                                                        | 928.0                                                                            | 1576.0                                                                          |
| 2 $\theta$ range (deg)                                           | 6.664 to 52.744                                                                               | 6.24 to 52.742                                                                   | 4.126 to 54.388                                                                 |
| No. of reflns collected                                          | 67124                                                                                         | 31624                                                                            | 8299                                                                            |
| No. of reflns used                                               | 9772                                                                                          | 8745                                                                             | 8299                                                                            |
| Parameters                                                       | 651                                                                                           | 476                                                                              | 473                                                                             |
| R <sub>1</sub> [ <i>I</i> >2 $\sigma$ ( <i>I</i> )] <sup>a</sup> | 0.0492                                                                                        | 0.0502                                                                           | 0.1133                                                                          |
| wR <sub>2</sub> (all reflns) <sup>b</sup>                        | 0.1146                                                                                        | 0.1481                                                                           | 0.3366                                                                          |
| GooF on <i>F</i> <sup>2c</sup>                                   | 1.022                                                                                         | 1.067                                                                            | 1.369                                                                           |
| Largest diff. peak and hole, (e·Å <sup>-3</sup> )                | 0.59/-0.82                                                                                    | 0.73/-0.61                                                                       | 1.53/-0.95                                                                      |

$$^a R_1 = \frac{\sum ||F_o| - |F_c||}{\sum |F_o|}; ^b wR_2 = \left\{ \frac{\sum [w(F_o^2 - F_c^2)^2]}{\sum [w(F_o^2)^2]} \right\}^{1/2};$$

$$^c S = \left\{ \frac{\sum [w(F_o^2 - F_c^2)^2]}{(n-p)} \right\}^{1/2}$$

**Table S3** Crystallographic data for **15**, **16** and **17**·toluene.

|                                                                  | <b>15</b>                                          | <b>16</b>                                                         | <b>17</b> ·toluene                                                 |
|------------------------------------------------------------------|----------------------------------------------------|-------------------------------------------------------------------|--------------------------------------------------------------------|
| Formula                                                          | C <sub>30</sub> H <sub>27</sub> N <sub>5</sub> OPd | C <sub>30</sub> H <sub>21</sub> F <sub>6</sub> N <sub>5</sub> OPd | C <sub>33.5</sub> H <sub>27</sub> F <sub>6</sub> N <sub>5</sub> Pd |
| Fw                                                               | 579.96                                             | 687.92                                                            | 720.027                                                            |
| Temperature (K)                                                  | 293(2)                                             | 204.15                                                            | 293(2)                                                             |
| Wavelength (Å)                                                   | 0.71073                                            | 0.71073                                                           | 0.71073                                                            |
| Crystal system                                                   | triclinic                                          | triclinic                                                         | triclinic                                                          |
| Space group                                                      | P-1                                                | P-1                                                               | P-1                                                                |
| <i>a</i> (Å)                                                     | 7.3937(3)                                          | 8.4101(5)                                                         | 8.7513(2)                                                          |
| <i>b</i> (Å)                                                     | 13.2167(4)                                         | 11.9592(3)                                                        | 12.4438(3)                                                         |
| <i>c</i> (Å)                                                     | 13.2300(5)                                         | 14.4653(3)                                                        | 14.6041(4)                                                         |
| $\alpha$ (deg)                                                   | 89.666(3)                                          | 82.430(2)                                                         | 92.799(2)                                                          |
| $\beta$ (deg)                                                    | 78.792(3)                                          | 74.423(4)                                                         | 96.175(2)                                                          |
| $\gamma$ (deg)                                                   | 87.117(3)                                          | 72.257(4)                                                         | 100.159(2)                                                         |
| Volume (Å <sup>3</sup> )                                         | 1266.57(8)                                         | 1332.82(10)                                                       | 1552.62(7)                                                         |
| <i>Z</i>                                                         | 2                                                  | 2                                                                 | 2                                                                  |
| $\rho_{\text{calcd}}$ (Mg/m <sup>3</sup> )                       | 1.521                                              | 1.714                                                             | 1.540                                                              |
| $\mu$ (Mo K $\alpha$ ) (mm <sup>-1</sup> )                       | 0.766                                              | 0.774                                                             | 0.666                                                              |
| <i>F</i> (000)                                                   | 592.0                                              | 688.0                                                             | 724.6                                                              |
| 2 $\theta$ range (deg)                                           | 5.616 to 52.742                                    | 6.594 to 52.744                                                   | 6.3 to 52.74                                                       |
| No. of reflns collected                                          | 10384                                              | 16195                                                             | 31500                                                              |
| No. of reflns used                                               | 10384                                              | 5443                                                              | 6336                                                               |
| Parameters                                                       | 339                                                | 390                                                               | 434                                                                |
| R <sub>1</sub> [ <i>I</i> >2 $\sigma$ ( <i>I</i> )] <sup>a</sup> | 0.0508                                             | 0.0417                                                            | 0.0294                                                             |
| wR <sub>2</sub> (all reflns) <sup>b</sup>                        | 0.1589                                             | 0.0995                                                            | 0.0744                                                             |
| GooF on <i>F</i> <sup>2</sup> <sup>c</sup>                       | 1.069                                              | 0.991                                                             | 1.039                                                              |
| Largest diff. peak and hole, (e·Å <sup>-3</sup> )                | 0.69/-0.76                                         | 0.96/-0.81                                                        | 0.41/-0.53                                                         |

$$^a R_1 = \frac{\sum ||F_o| - |F_c||}{\sum |F_o|}; \quad ^b wR_2 = \left\{ \frac{\sum [w(F_o^2 - F_c^2)^2]}{\sum [w(F_o^2)^2]} \right\}^{1/2};$$

$$^c S = \left\{ \frac{\sum [w(F_o^2 - F_c^2)^2]}{(n-p)} \right\}^{1/2}$$



**Table S4** List of electronic energies of **G, H, H<sup>•</sup>, H', I, TS, K** and **K'** at the B3LYP/6-31G\*/LANL2DZ level of theory and basis sets.

| <b>Systems</b>       | <b>E<br/>(Hartree)</b> | <b>ZPE<br/>(Hartree)</b> | <b>Thermal<br/>correction<br/>to energy<br/>(Hartree)</b> | <b>Thermal<br/>correction to<br/>Gibbs<br/>free energy<br/>(Hartree)</b> | <b>Solvation<br/>(Toluene)<br/>kcal/mol</b> | <b>Total energy including<br/>solvent,<br/>ZPE and thermal<br/>Corrections<br/>(Hartree)</b> |
|----------------------|------------------------|--------------------------|-----------------------------------------------------------|--------------------------------------------------------------------------|---------------------------------------------|----------------------------------------------------------------------------------------------|
| <b>G</b>             | -1212.1564521          | 0.361729                 | 0.386142                                                  | 0.304495                                                                 | -6.83                                       | -1211.114967                                                                                 |
| <b>H</b>             | -1211.585352           | 0.346434                 | 0.371052                                                  | 0.287614                                                                 | -27.03                                      | -1210.623335                                                                                 |
| <b>H<sup>•</sup></b> | -1211.549814           | 0.349679                 | 0.37389                                                   | 0.291716                                                                 | -5.50                                       | -1210.54329                                                                                  |
| <b>I</b>             | -1361.902723           | 0.355147                 | 0.381579                                                  | 0.295761                                                                 | -33.09                                      | -1360.922961                                                                                 |
| <b>TS</b>            | -1361.871823           | 0.34949                  | 0.375878                                                  | 0.289782                                                                 | -32.369                                     | -1360.908247                                                                                 |
| <b>K</b>             | -1286.192894           | 0.343056                 | 0.368031                                                  | 0.285312                                                                 | -8.04                                       | -1285.209303                                                                                 |
| <b>K'</b>            | -1286.194096           | 0.342997                 | 0.36803                                                   | 0.283201                                                                 | -7.75                                       | -1285.212211                                                                                 |
| <b>H'</b>            | -1211.585305           | 0.346289                 | 0.370843                                                  | 0.288111                                                                 | -26.97                                      | -1210.623049                                                                                 |

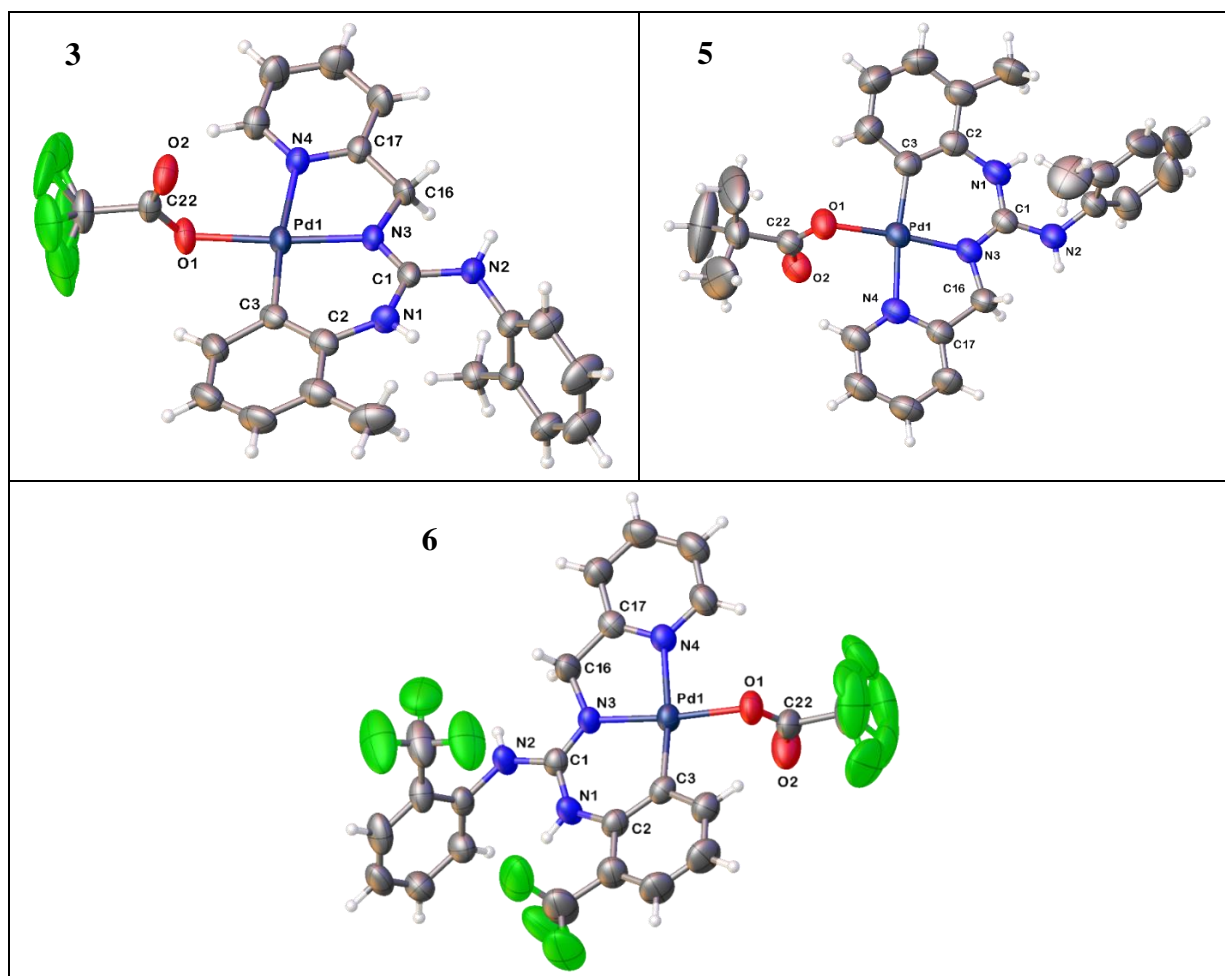

**Fig. S1** Molecular structures of  $3 \cdot \frac{1}{2}$  toluene,  $5 \cdot \frac{1}{2}$  toluene  $\cdot \frac{1}{2}$  pivalic acid, **6** at the 50% probability level. Number of molecules in an asymmetric unit,  $Z' = 2$ . Only molecule 1 is shown for clarity.  $\text{CF}_3$  unit of the carboxylate ligand revealed a rotational disorder.

**Table S5** Selected bond parameters of **3**, **6**, **III** and **IV** around the CN<sub>3</sub> core of guanidines.

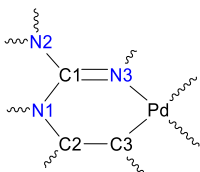

| Bond     | <b>3</b> ·½ toluene    | <b>6</b>              | <b>IV</b> <sup>a</sup> | <b>V</b> <sup>a</sup> |
|----------|------------------------|-----------------------|------------------------|-----------------------|
| C1–N1, Å | 1.342(10) <sup>b</sup> | 1.351(4) <sup>b</sup> | 1.331(7) <sup>b</sup>  | 1.327(7)              |
|          | 1.362(10) <sup>c</sup> | 1.349(5) <sup>c</sup> | 1.331(8) <sup>c</sup>  |                       |
| C1–N2, Å | 1.367(9) <sup>b</sup>  | 1.354(4) <sup>b</sup> | 1.342(8) <sup>b</sup>  | 1.334(7)              |
|          | 1.373(9) <sup>c</sup>  | 1.356(5) <sup>c</sup> | 1.347(8) <sup>c</sup>  |                       |
| C1–N3, Å | 1.304(10) <sup>b</sup> | 1.288(4) <sup>b</sup> | 1.340(8) <sup>b</sup>  | 1.357(7)              |
|          | 1.291(10) <sup>c</sup> | 1.291(5) <sup>c</sup> | 1.334(8) <sup>c</sup>  |                       |

<sup>a</sup> Ref. 20

<sup>b</sup> molecule 1

<sup>c</sup> molecule 2

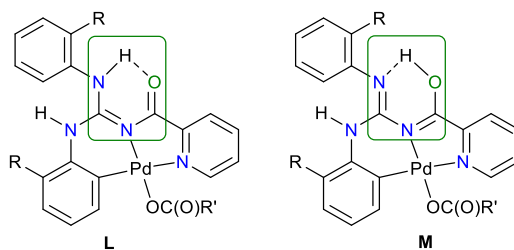

**Fig. S2** Two types of resonance assisted hydrogen bond present in **IV** and **V**.<sup>20</sup>

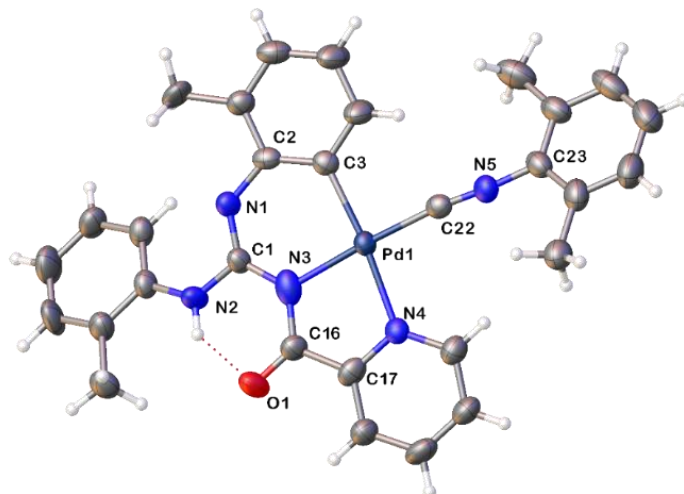

**Fig. S3** Molecular structure of **15** at the 50% probability level. Hydrogen bond parameters ( $\text{\AA}$  and deg):  $\text{O1}\cdots\text{H2} = 1.861$ ;  $\text{O1}\cdots\text{N2} = 2.575$ ;  $\text{N2-H2}\cdots\text{O1} = 139.334$ .

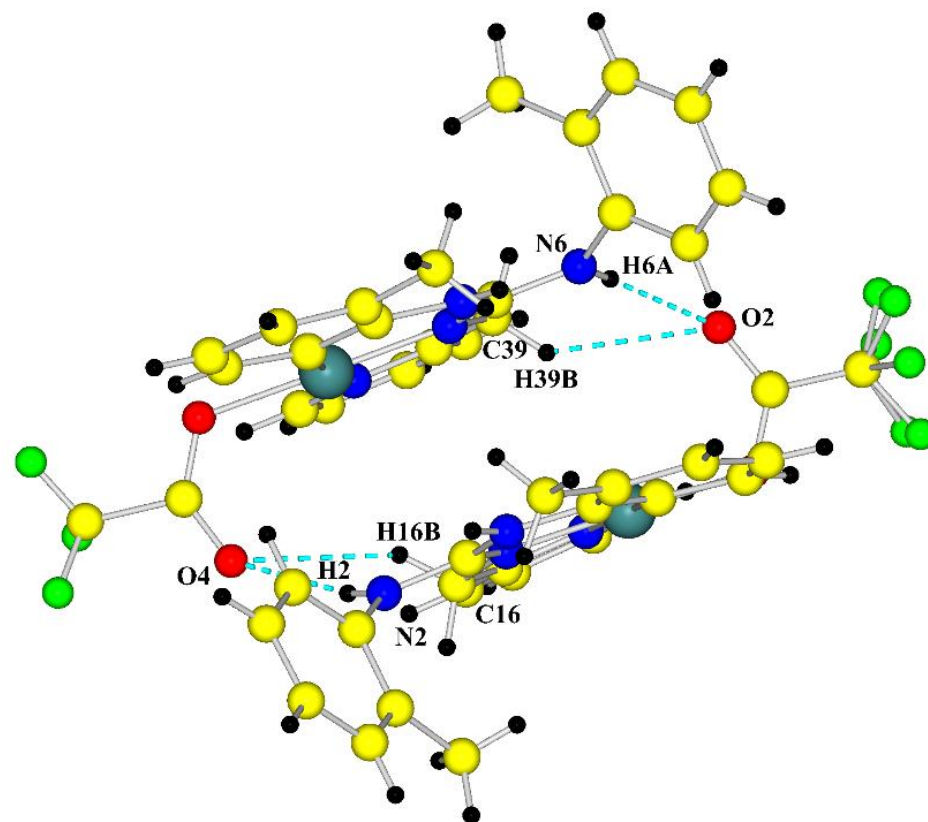

**Fig. S4** Intermolecular hydrogen bond interactions in the crystal structure of  $3 \cdot \frac{1}{2}$  toluene. Hydrogen bond parameters ( $\text{\AA}$  and deg):

$\text{O2} \cdots \text{H6A} = 2.066$ ;  $\text{O2} \cdots \text{N6} = 2.870$ ;  $\text{N6-H6A} \cdots \text{O2} = 155.45$ ;  $\text{O2} \cdots \text{H39B} = 2.671$ ;  $\text{O2} \cdots \text{C39} = 3.450$ ;  $\text{C39-H39B} \cdots \text{O2} = 137.68$ ;

$\text{O4} \cdots \text{H2} = 2.061$ ;  $\text{O4} \cdots \text{N2} = 2.859$ ;  $\text{N2-H2} \cdots \text{O4} = 153.95$ ;  $\text{O4} \cdots \text{H16B} = 2.677$ ;  $\text{O4} \cdots \text{C16} = 3.516$ ;  $\text{C16-H36B} \cdots \text{O4} = 145.09$ .

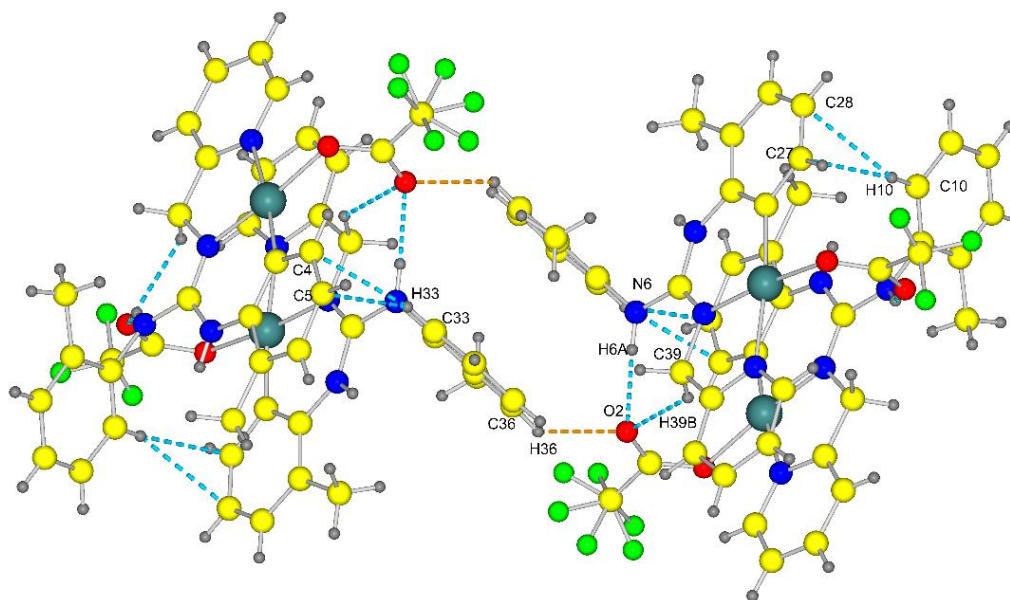

**Fig. S5** Intermolecular hydrogen bond interactions in the crystal structure of  $3 \cdot \frac{1}{2}$  toluene. Hydrogen bond parameters ( $\text{\AA}$  and deg):  
 $\text{O2} \cdots \text{H6A} = 2.060$ ;  $\text{O2} \cdots \text{N6} = 2.864$ ;  $\text{N6-H6A} \cdots \text{O2} = 155.18$ ;  $\text{O2} \cdots \text{H39B} = 2.672$ ;  $\text{O2} \cdots \text{C39} = 3.448$ ;  $\text{C39-H39B} \cdots \text{O2} = 137.35$ ;  
 $\text{O2} \cdots \text{H36} = 2.787$ ;  $\text{O2} \cdots \text{C36} = 3.540$ ;  $\text{C39-H39B} \cdots \text{O2} = 142.35$ ;  $\text{C27} \cdots \text{H10} = 2.745$ ;  $\text{C27} \cdots \text{C10} = 3.662$ ;  $\text{C10-H10} \cdots \text{C27} = 169.31$ ;  
 $\text{C28} \cdots \text{H10} = 2.861$ ;  $\text{C28} \cdots \text{C10} = 3.701$ ;  $\text{C10-H10} \cdots \text{C28} = 150.91$ ;  $\text{H33} \cdots \text{C4} = 2.726$ ;  $\text{H33} \cdots \text{C5} = 2.766$ ;  $\text{C33-H33} \cdots \text{C4} = 167.86$ ;  
 $\text{C33-H33} \cdots \text{C5} = 148.02$ ;  $\text{O4} \cdots \text{H16B} = 3.575$ ;  $\text{O4} \cdots \text{C16} = 3.518$ ;  $\text{C16-H36B} \cdots \text{O4} = 144.82$ . In crystal structure of  $3 \cdot \frac{1}{2}$  toluene, there are two molecules in an asymmetric unit arranged in a head to tail fashion and linked with each other through  $\text{N-H} \cdots \text{O}$  and  $\text{C-H} \cdots \text{O}$  interactions, both interactions within the dimer and a  $\text{C-H} \cdots \text{O}$  interaction with the adjacent dimer. Thus, the carbonyl O atom of trifluoroacetate acts as a trifurcated H bond acceptor. The head to tail dimer is also stabilized by a pair of  $\text{C-H} \cdots \pi$  interactions.

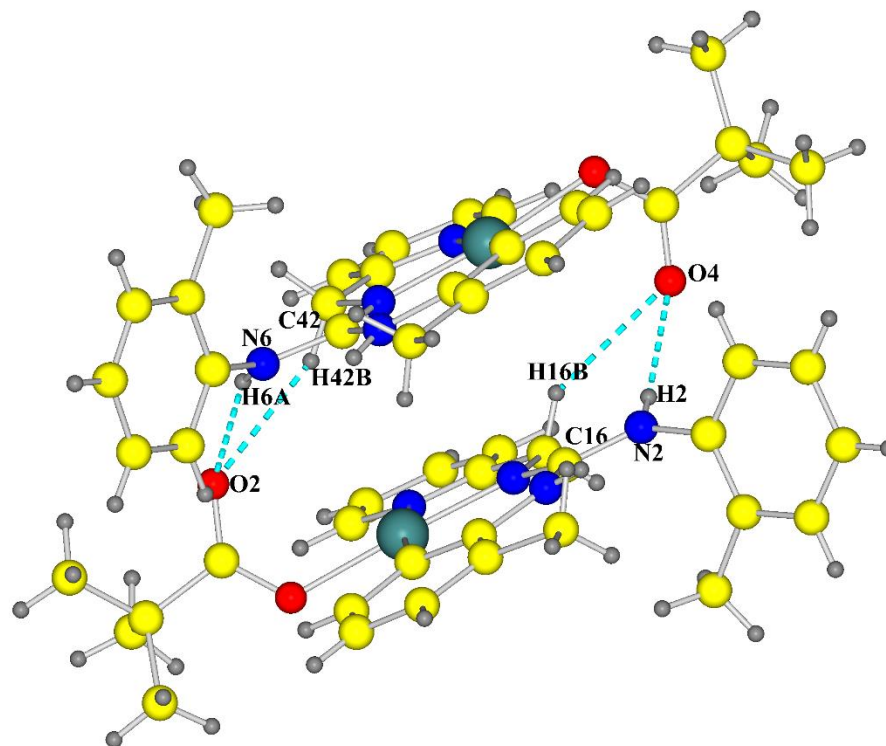

**Fig. S6** Intermolecular hydrogen bond interactions in the crystal structure of  $5 \cdot \frac{1}{2}$  toluene  $\cdot \frac{1}{2}$  pivalic acid. Hydrogen bond parameters ( $\text{\AA}$  and deg):  $\text{O2} \cdots \text{H6A} = 2.017$ ;  $\text{O2} \cdots \text{N6} = 2.780$ ;  $\text{N6-H6A} \cdots \text{O2} = 147.38$ ;  $\text{O2} \cdots \text{H42B} = 2.568$ ;  $\text{O2} \cdots \text{C42} = 3.434$ ;  $\text{C42-H42B} \cdots \text{O2} = 148.77$ ;  $\text{O4} \cdots \text{H2} = 2.080$ ;  $\text{O4} \cdots \text{N2} = 2.864$ ;  $\text{N2-H2} \cdots \text{O4} = 151.17$ ;  $\text{O4} \cdots \text{H16B} = 2.591$ ;  $\text{O4} \cdots \text{C16} = 3.427$ ;  $\text{C16-H36B} \cdots \text{O4} = 144.34$ .

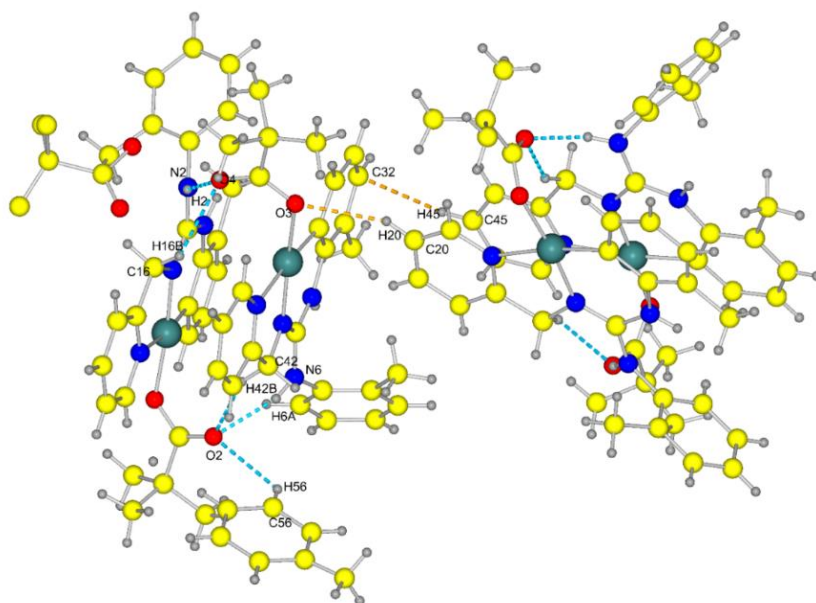

**Fig. S7** Intermolecular hydrogen bond interactions in the crystal structure of  $5 \cdot \frac{1}{2}$  toluene  $\cdot \frac{1}{2}$  pivalic acid. Hydrogen bond parameters ( $\text{\AA}$  and deg):  $\text{O2} \cdots \text{H6A} = 2.027$ ;  $\text{O2} \cdots \text{N6} = 2.782$ ;  $\text{N6-H6A} \cdots \text{O2} = 145.98$ ;  $\text{O2} \cdots \text{H42B} = 2.564$ ;  $\text{O2} \cdots \text{C42} = 3.448$ ;  $\text{C42-H42B} \cdots \text{O2} = 148.63$ ;  $\text{O2} \cdots \text{H56} = 2.695$ ;  $\text{O2} \cdots \text{C56} = 3.367$ ;  $\text{C56-H56} \cdots \text{O2} = 129.81$ ;  $\text{O4} \cdots \text{H2} = 2.084$ ;  $\text{O4} \cdots \text{N2} = 2.867$ ;  $\text{N2-H2} \cdots \text{O4} = 150.89$ ;  $\text{O2} \cdots \text{H16B} = 2.589$ ;  $\text{O2} \cdots \text{C16} = 3.423$ ;  $\text{C16-H16B} \cdots \text{O2} = 144.23$ ;  $\text{O3} \cdots \text{H20} = 2.578$ ;  $\text{O3} \cdots \text{C20} = 3.451$ ;  $\text{C20-H20} \cdots \text{O3} = 156.34$ ;  $\text{C32} \cdots \text{H45} = 3.104$ ;  $\text{C32} \cdots \text{C45} = 3.688$ ;  $\text{C45-H45} \cdots \text{C32} = 169.62$ . The head to tail dimer (dimer 1) is interlinked through a pair of  $\text{N-H} \cdots \text{O}$  and  $\text{C-H} \cdots \text{O}$  interactions wherein the carbonyl O atom of the pivalate is acceptor bifurcating. In another head to tail dimer (dimer 2) the molecule involved are linked with each other through  $\text{N-H} \cdots \text{O}$ ,  $\text{C-H} \cdots \text{O}$  and  $\text{C-H} \cdots \text{O}$  (toluene) interactions and the O atom of the pivalate is acceptor trifurcating. The dimer 1 and the dimer 2 are linked through one  $\text{C-H} \cdots \text{O}$  and  $\text{C-H} \cdots \pi$  interactions.



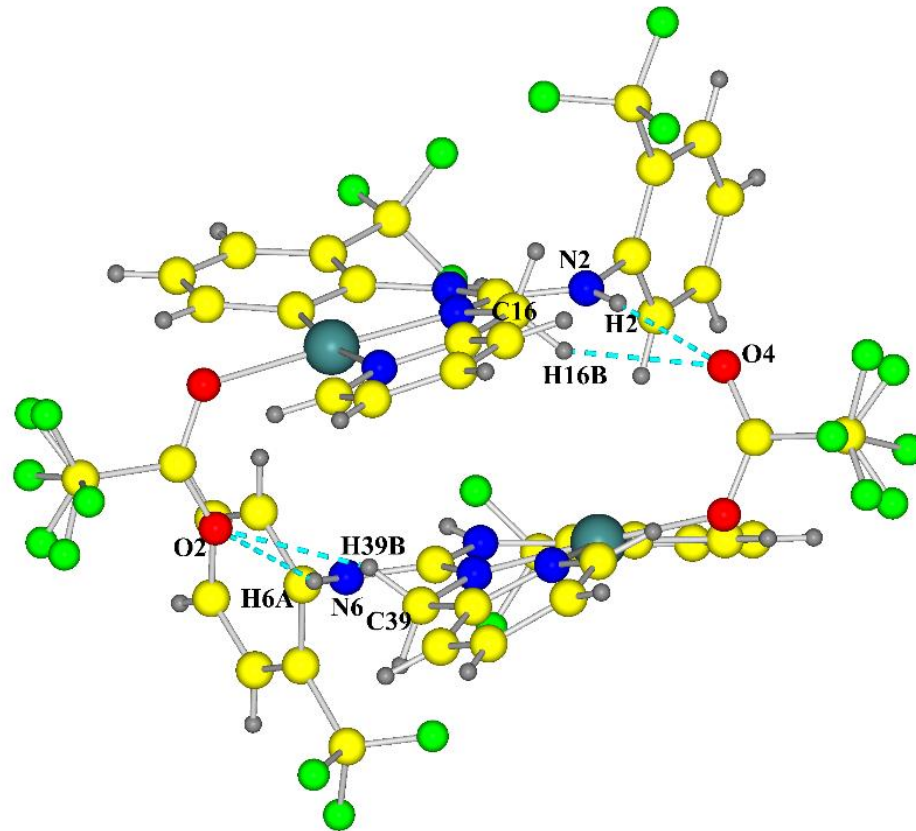

**Fig. S8** Intermolecular hydrogen bond interactions in the crystal structure of **6**. Hydrogen bond parameters (Å and deg): O2...H6A = 2.084; O2...N6 = 2.860; N6-H6A...O2 = 149.87; O2...H39B = 2.437; O2...C39 = 3.316; C39-H39B...O2 = 150.60; O4...H2 = 2.099; O4...N2 = 2.902; N2-H2...O4 = 155.54; O4...H16B = 2.480; O4...C16 = 3.342; C16-H36B...O4 = 147.92.

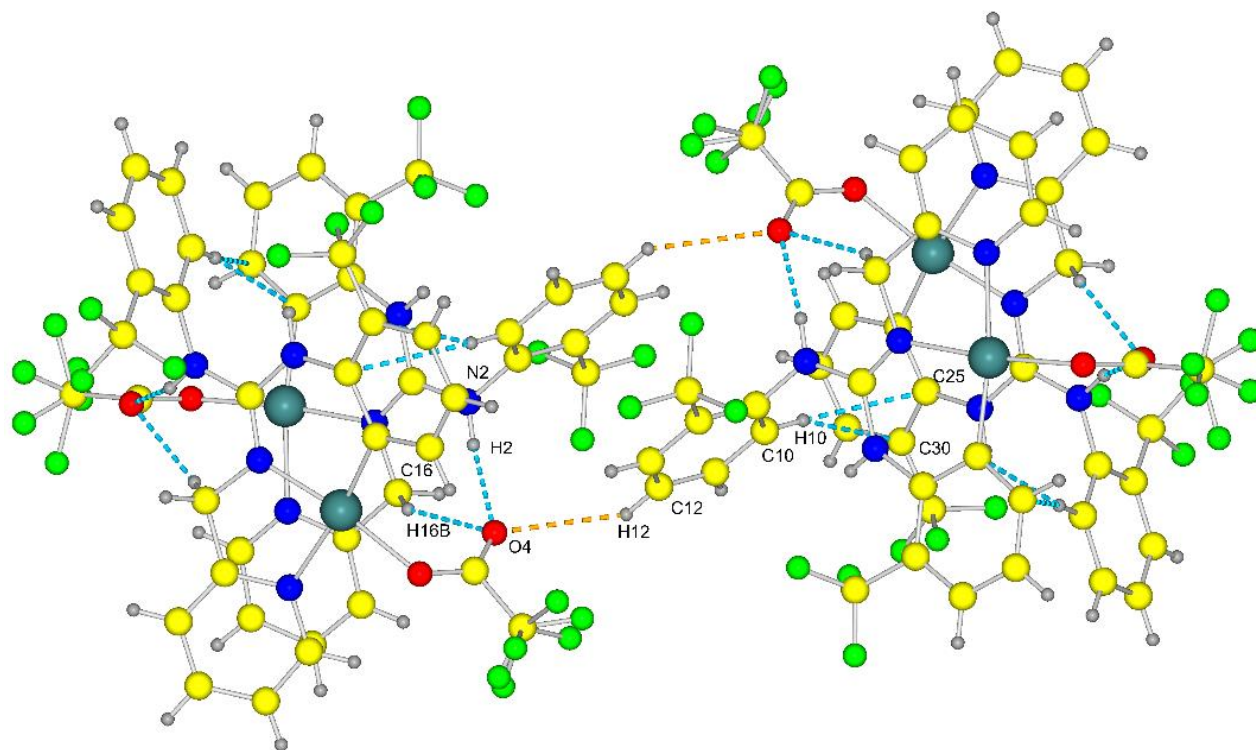

**Fig. S9** Intermolecular hydrogen bond interactions in the crystal structure of **6**. Hydrogen bond parameters (Å and deg): O4...H2 = 2.099; O4...N2 = 2.904; N2-H2...O4 = 155.54; O4...H16B = 2.480; O4...C16 = 3.342; C16-H16B...O4 = 147.92; O4...H12 = 2.675; O4...C12 = 3.392; C12-H12...O4 = 134.49; C25...H10 = 2.733; C25...C10 = 3.654; C10-H10...C25 = 170.88; C30...H10 = 2.776; C30...C10 = 3.643; C10-H10...C30 = 155.51. The non-covalent interactions within and between the head to tail dimer in **6** are identical to those analogous interactions observed in the crystal structure of **3**·½ toluene.

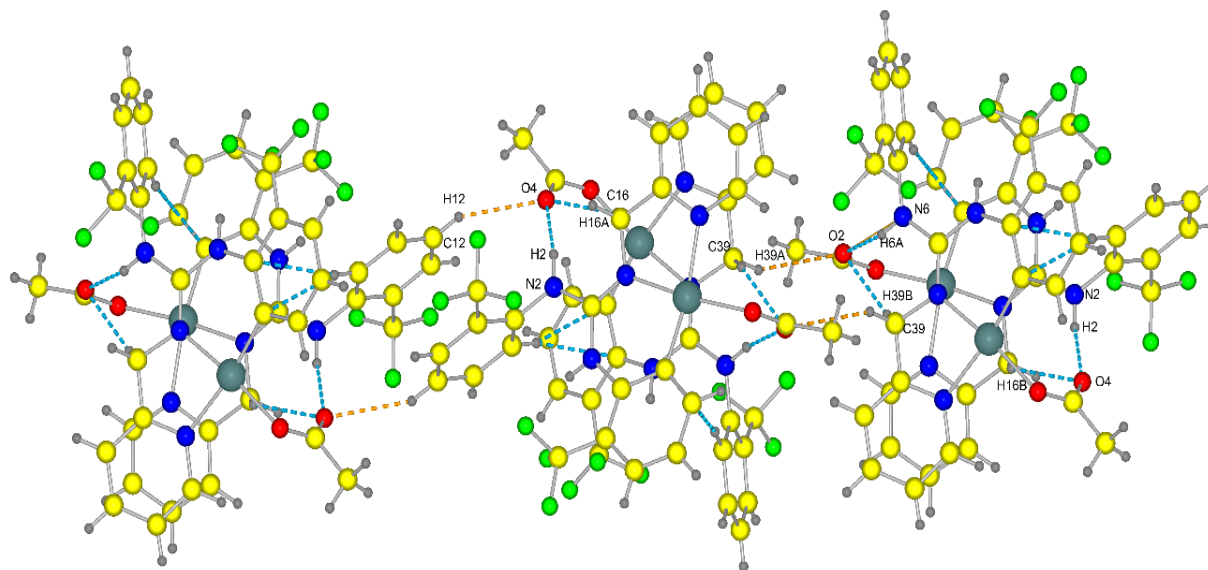

**Fig S10** Intermolecular hydrogen bond interactions in the crystal structure of **7**. Hydrogen bond parameters (Å and deg):  $O4 \cdots H12 = 2.557$ ;  $O4 \cdots C12 = 3.412$ ;  $C12-H12 \cdots O4 = 152.92$ ;  $O2 \cdots H39A = 2.700$ ;  $O2 \cdots C39 = 3.575$ ;  $C39-H39A \cdots O2 = 150.23$ . The dimer 1 illustrated in Fig. S9 is linked to two adjacent dimers (dimers 2 and 3) in two different ways. The dimer 1 is linked to the dimer 2 by a pair of intermolecular  $C-H \cdots O$  interactions while dimers 1 and 3 are linked through a pair of  $C-H \cdots O$  interactions involving  $CH_2$  protons and carbonyl O atom of the acetate ligand.

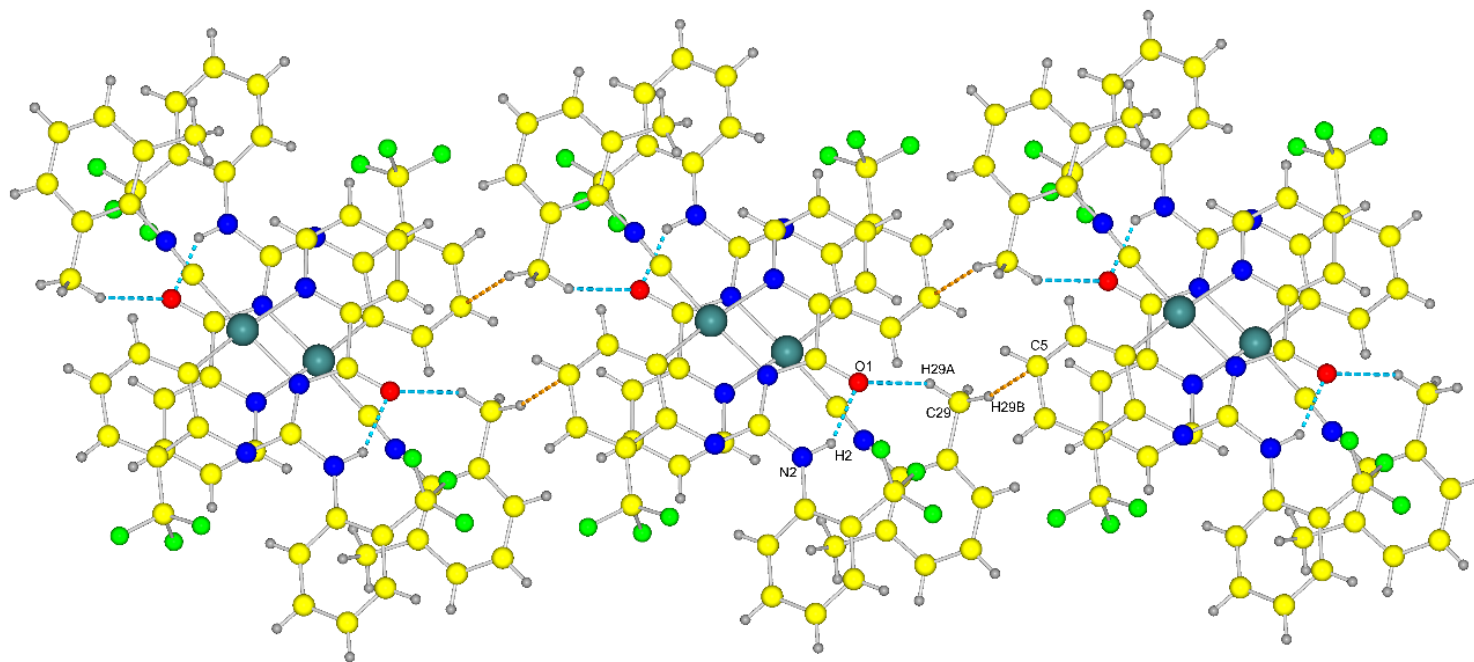

**Fig. S11** Intermolecular hydrogen bond interactions in the crystal structure of **16**. Hydrogen bond parameters (Å and deg): O1...H2 = 1.785; O1...N2 = 2.515; N2-H2...O1 = 141.55; O1...H29A = 2.563; O1...C29 = 3.393; C29-H29A...O1 = 144.90; C5...H29B = 2.775; C5...C29B = 3.668; C29-H29B...C5 = 154.98. In crystal structure of **16**, the head to tail dimer is linked through a pair of intramolecular N-H...O and intermolecular C-H...O interactions. This dimer is linked to adjacent identical dimer through two pairs of C-H... $\pi$  interaction.

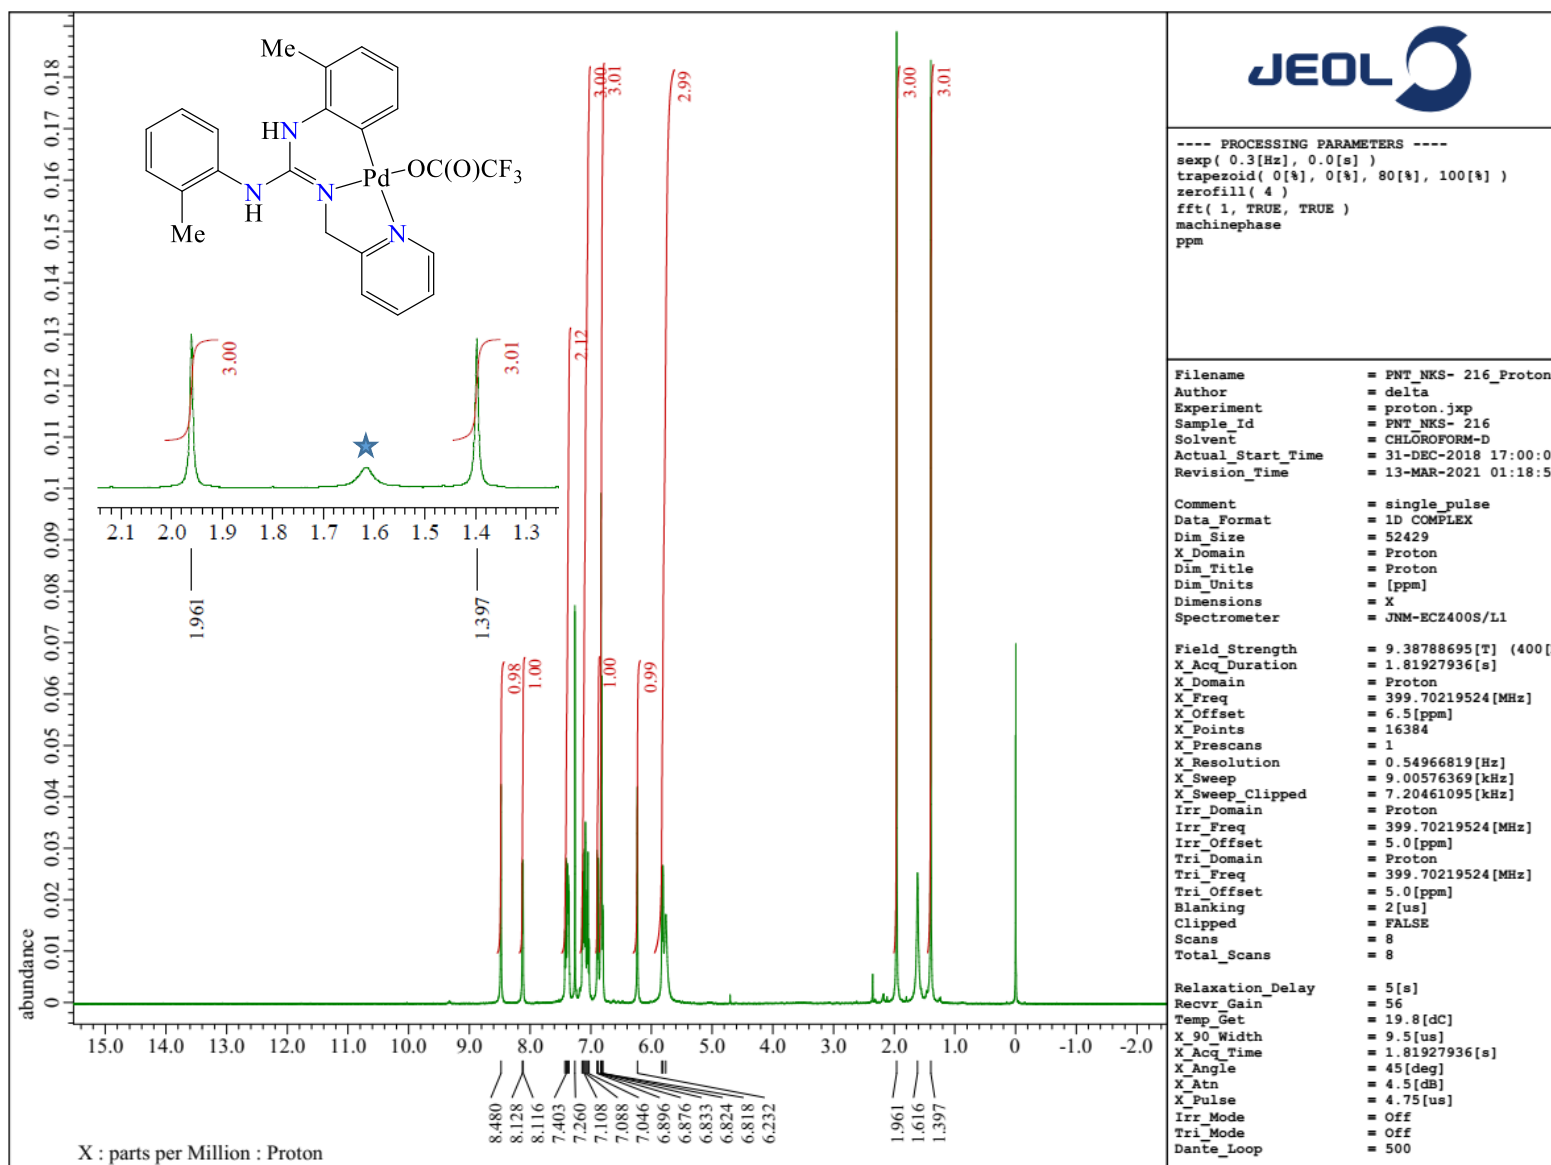

$^1\text{H}$  NMR ( $\text{CDCl}_3$ , 400 MHz) spectrum of **3**· $\frac{1}{2}$  toluene. The  $\star$  symbol indicates protons of residual water.

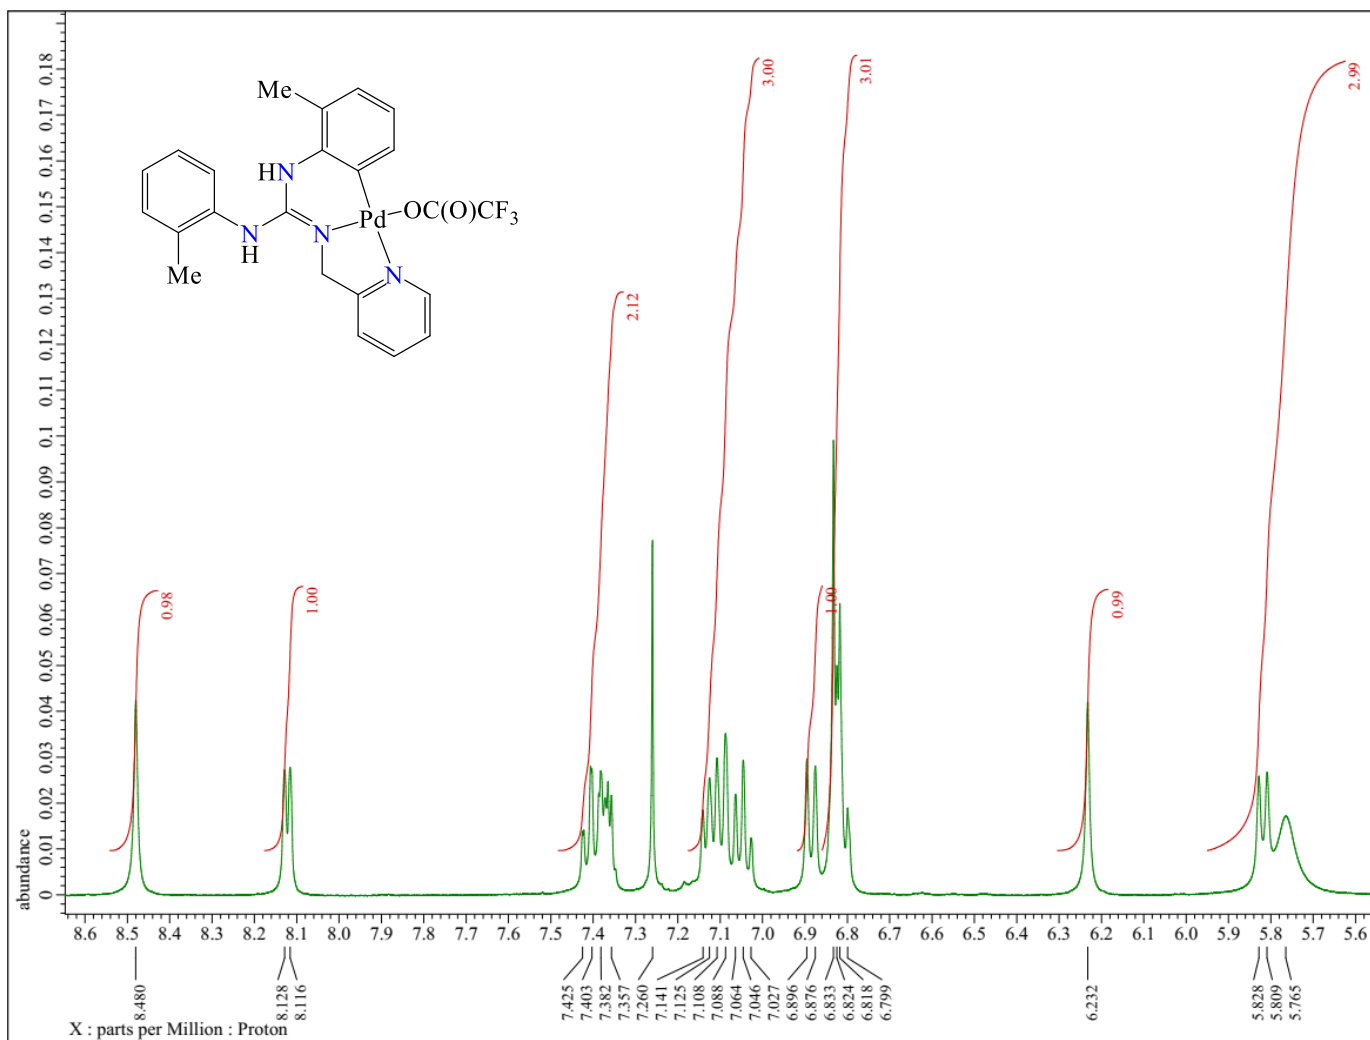

<sup>1</sup>H NMR (CDCl<sub>3</sub>, 400 MHz) spectrum of **3**·½ toluene in indicated region.

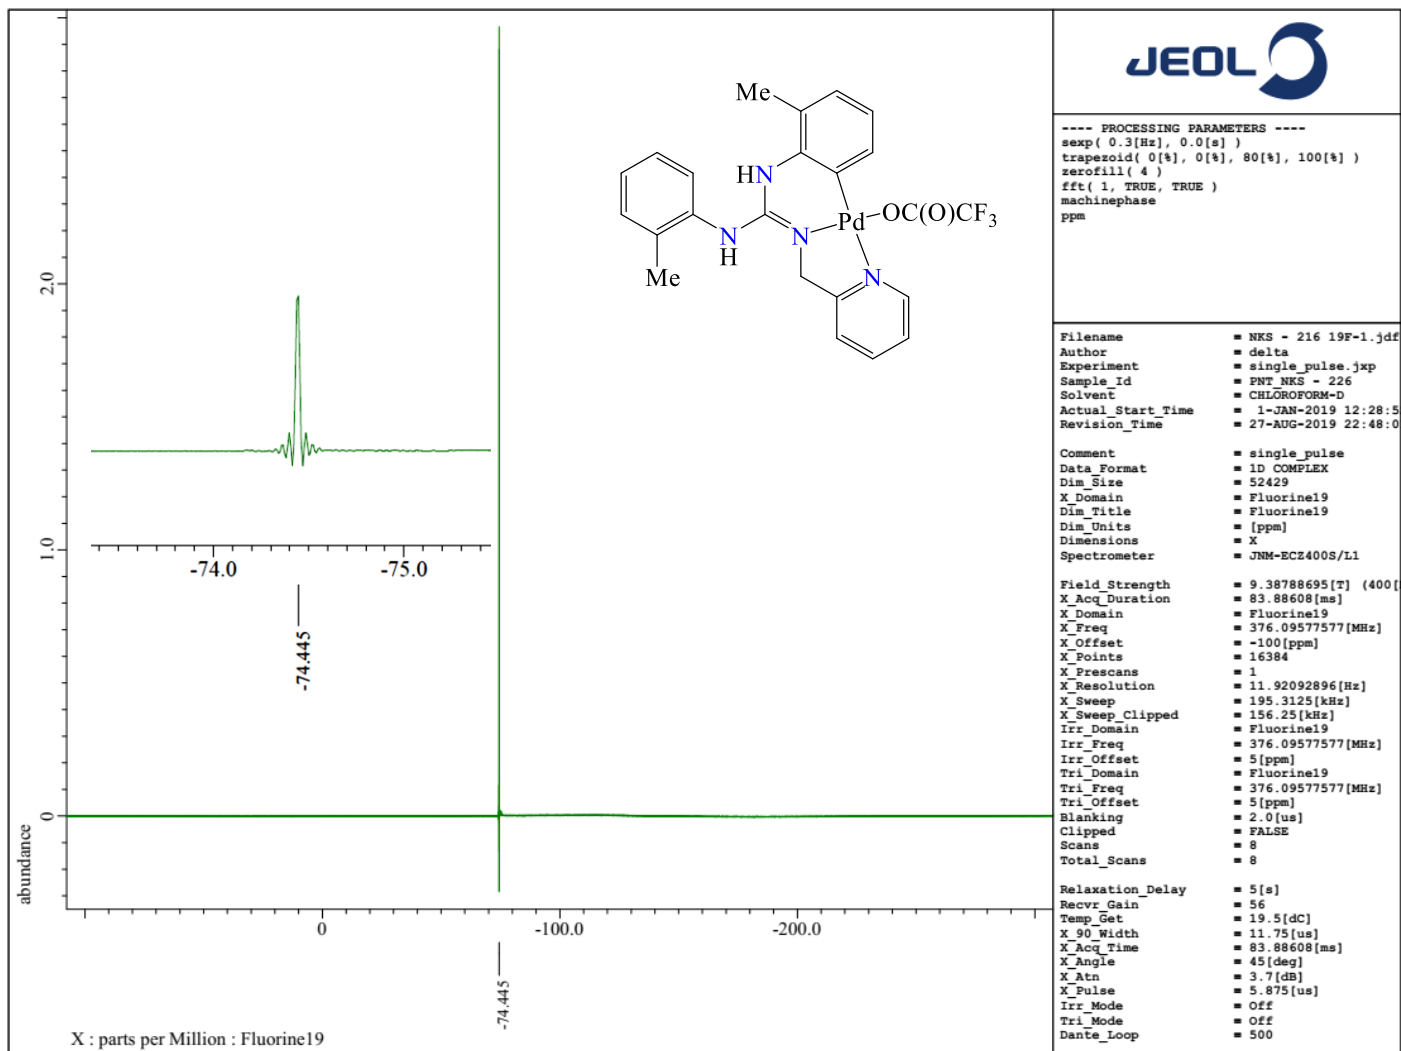

$^{19}\text{F}\{^1\text{H}\}$  NMR ( $\text{CDCl}_3$ , 376.5 MHz) spectrum of **3-1/2** toluene.

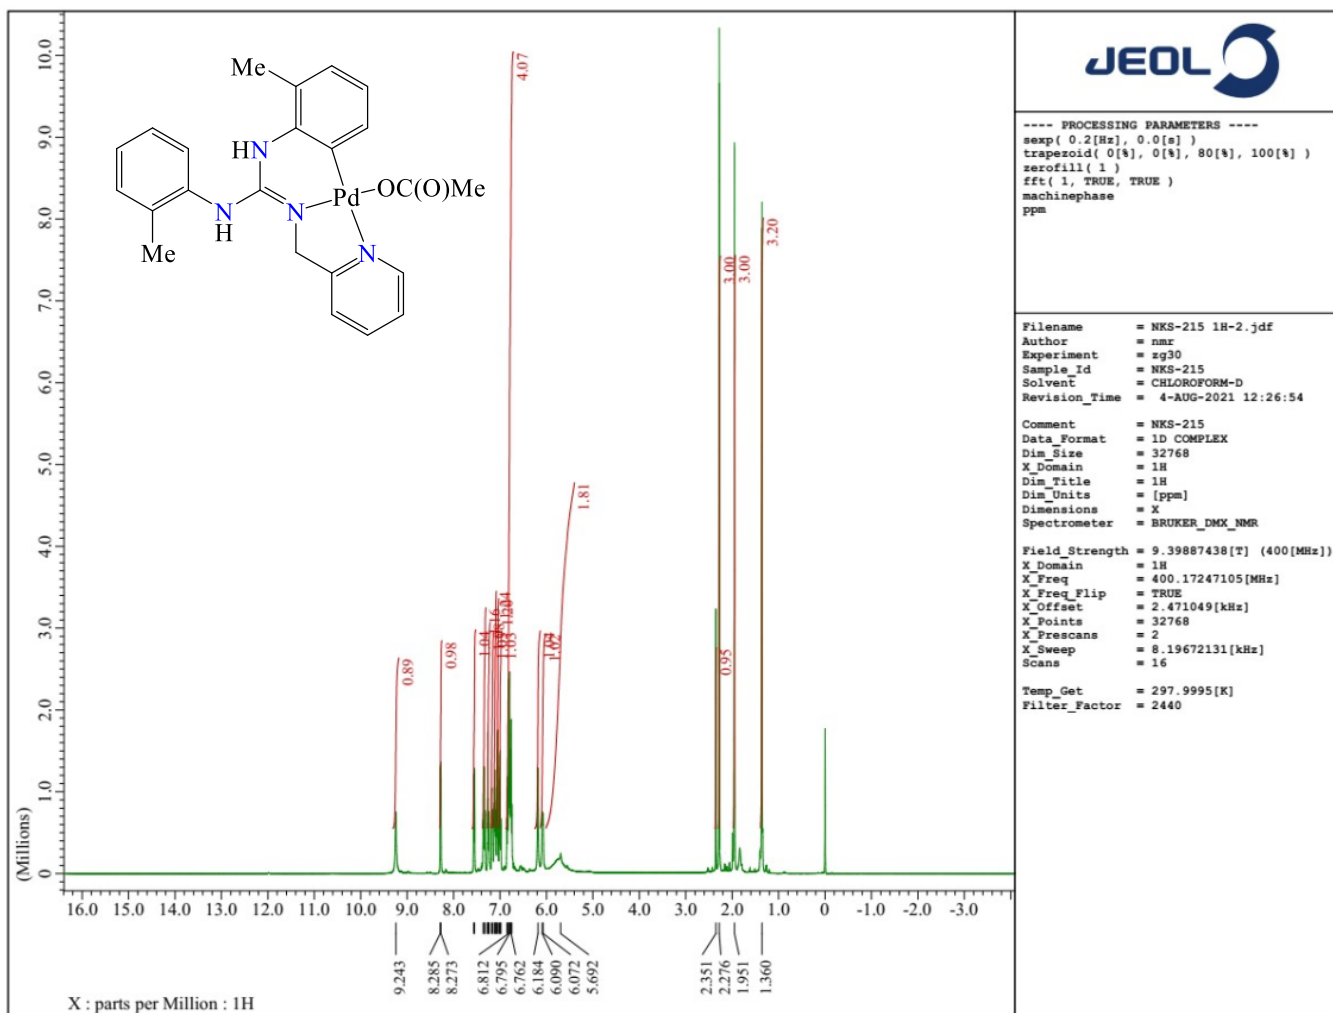

$^1\text{H}$  NMR ( $\text{CDCl}_3$ , 400 MHz) spectrum of **4**· $\frac{1}{4}$  toluene.



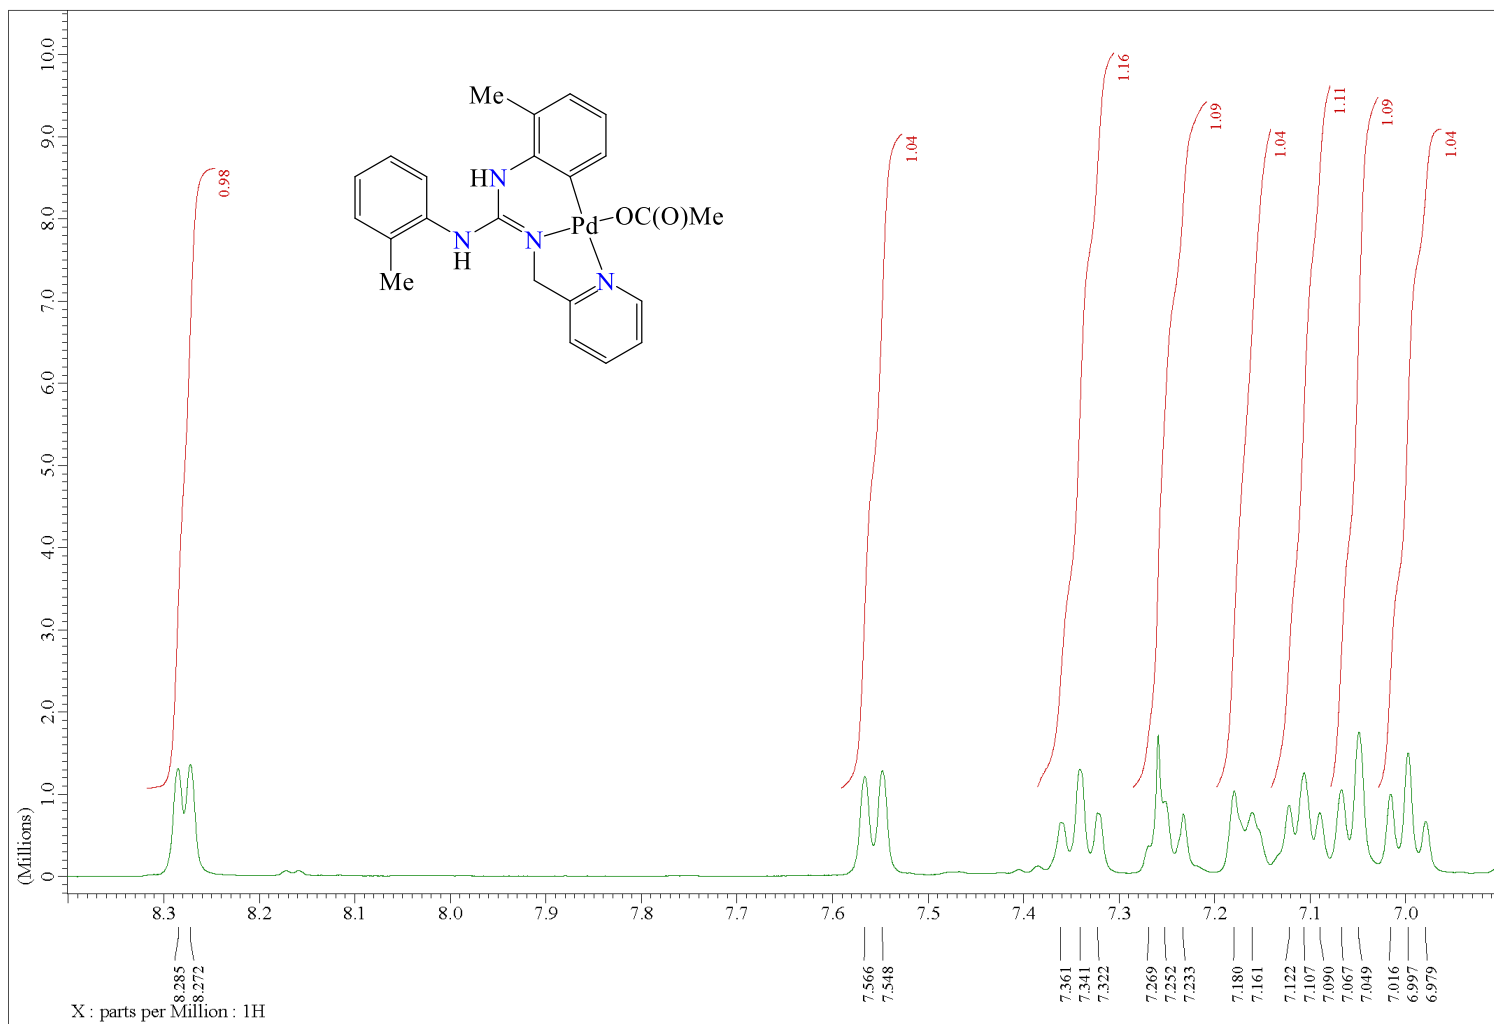

$^1\text{H}$  NMR (CDCl<sub>3</sub>, 400 MHz) spectrum of **4** in toluene in indicated region.

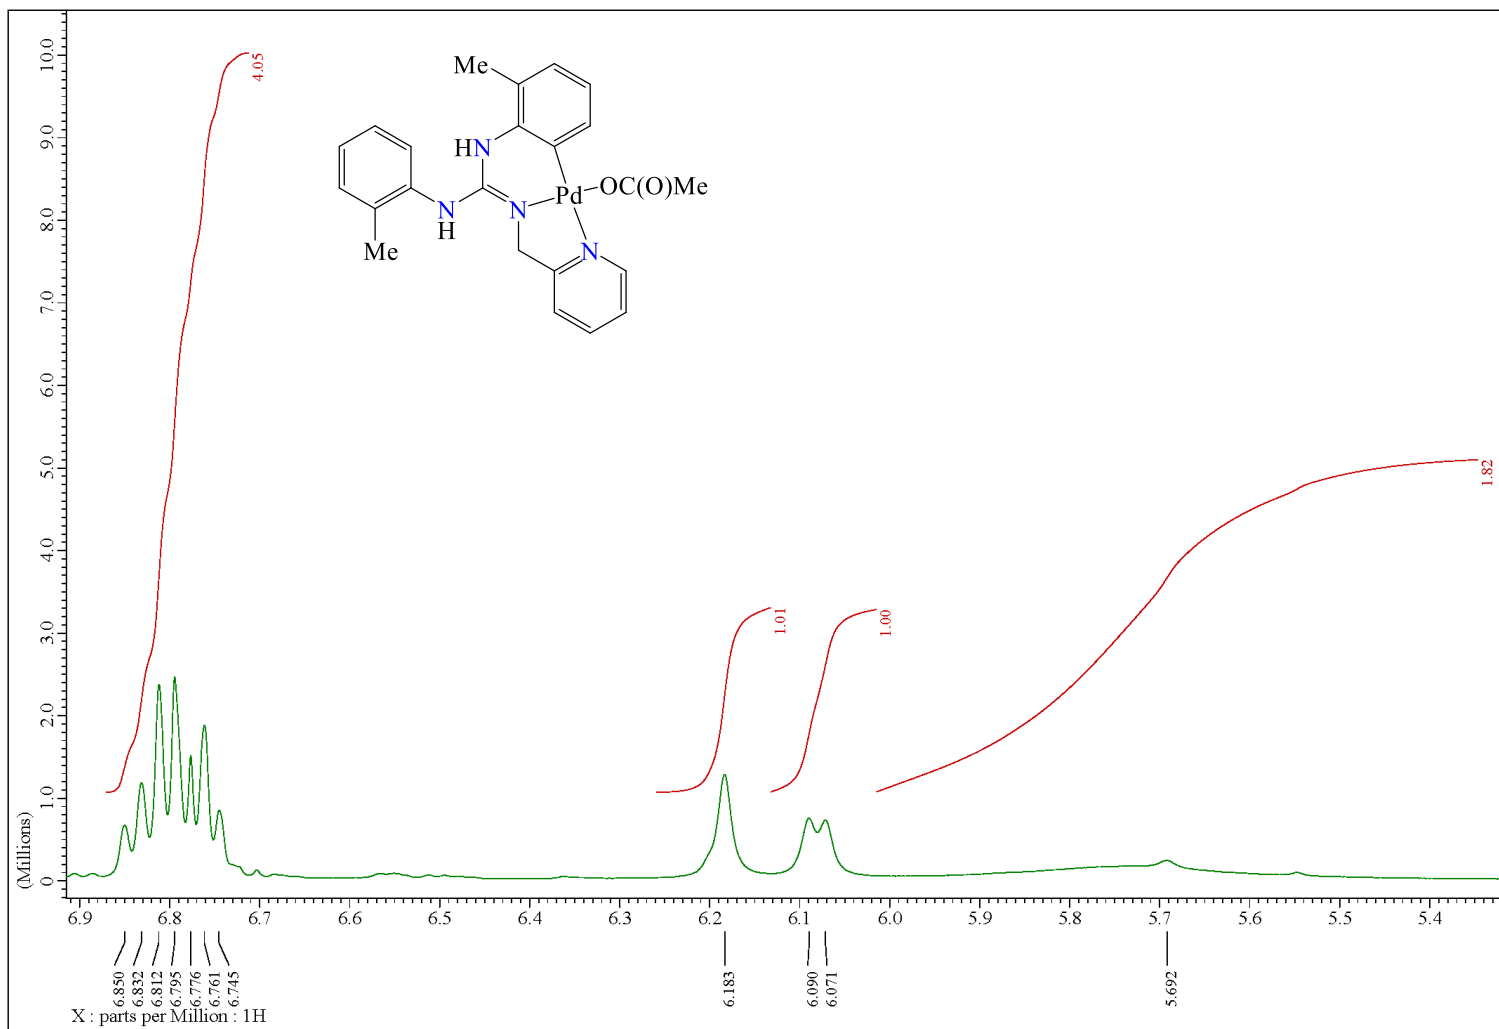

$^1\text{H}$  NMR ( $\text{CDCl}_3$ , 400 MHz) spectrum of **4**· $\frac{1}{4}$  toluene in indicated region.

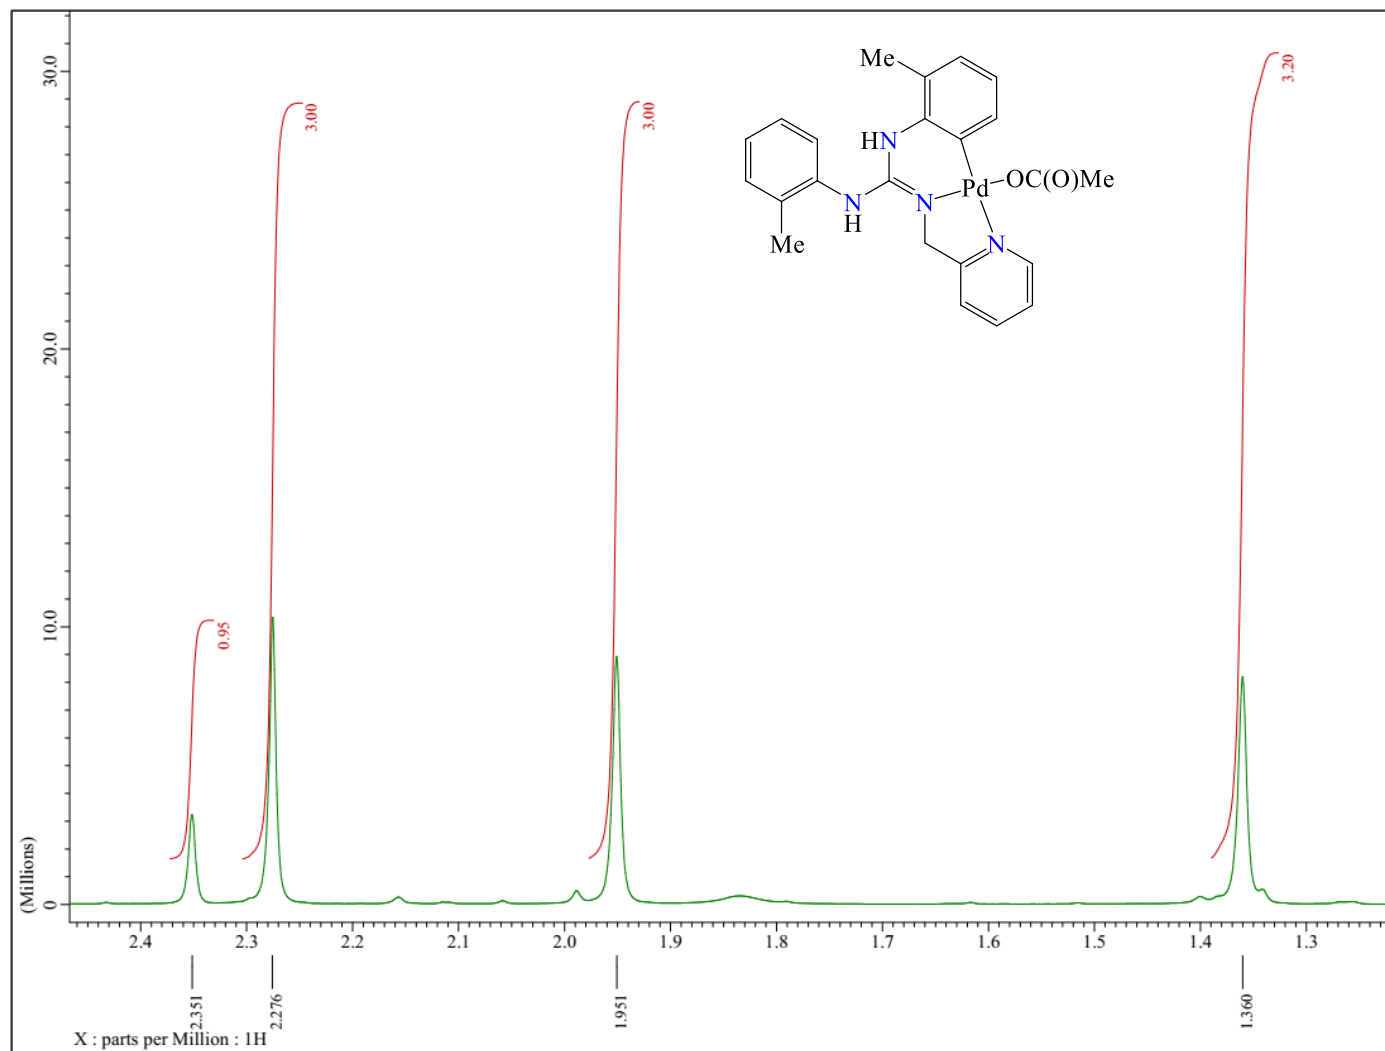

$^1\text{H}$  NMR ( $\text{CDCl}_3$ , 400 MHz) spectrum of **4** in 1/4 toluene in indicated region.

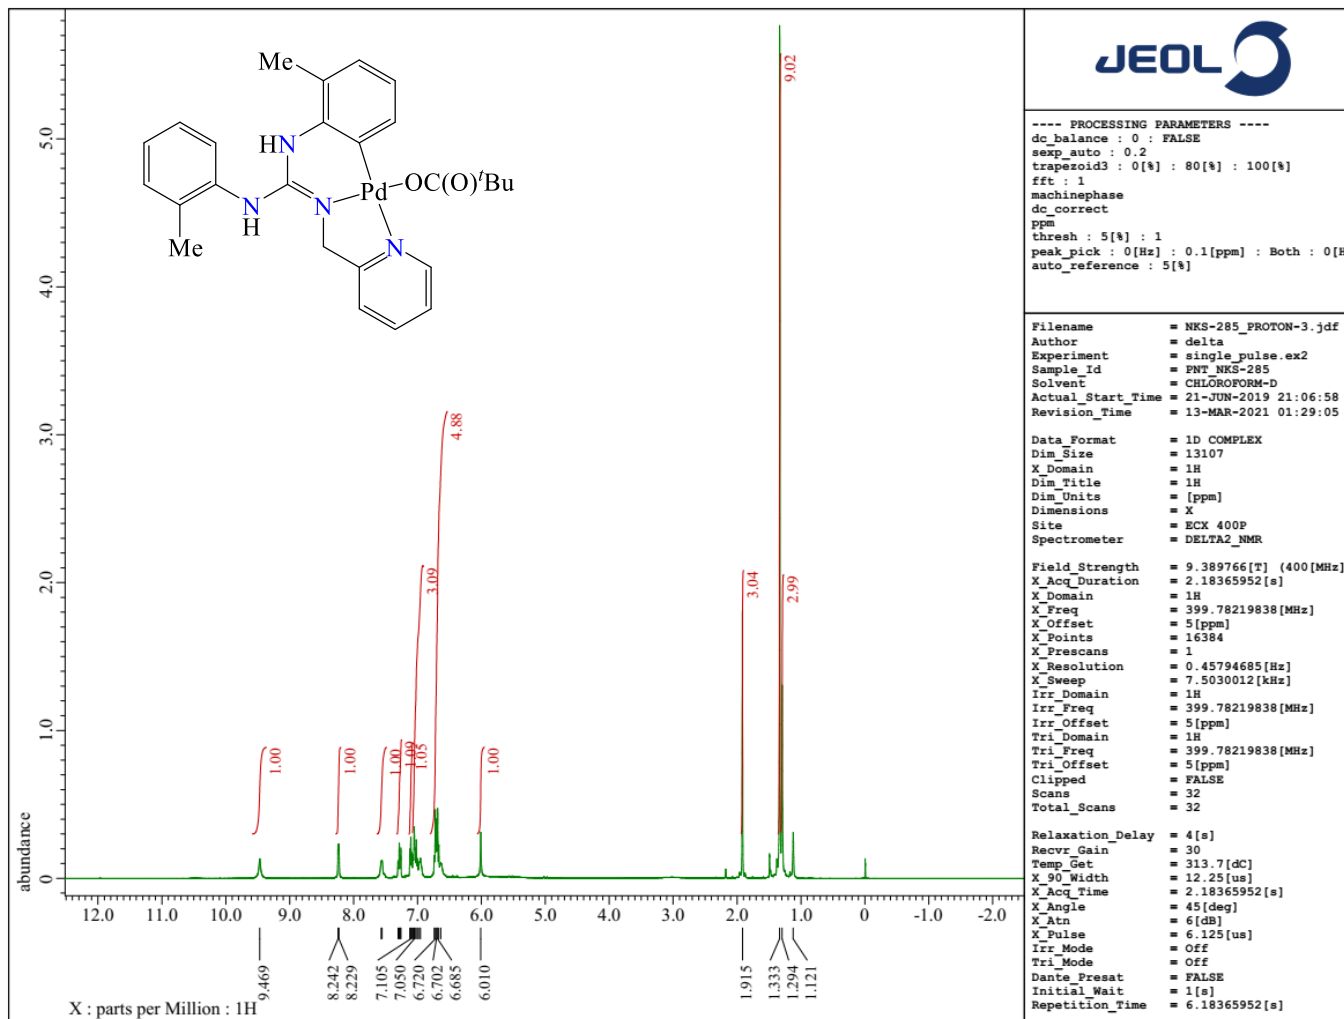

$^1\text{H}$  NMR ( $\text{CDCl}_3$ , 400 MHz) spectrum of  $5 \cdot \frac{1}{2}$  toluene :  $\frac{1}{2}$  pivalic acid in indicated region.

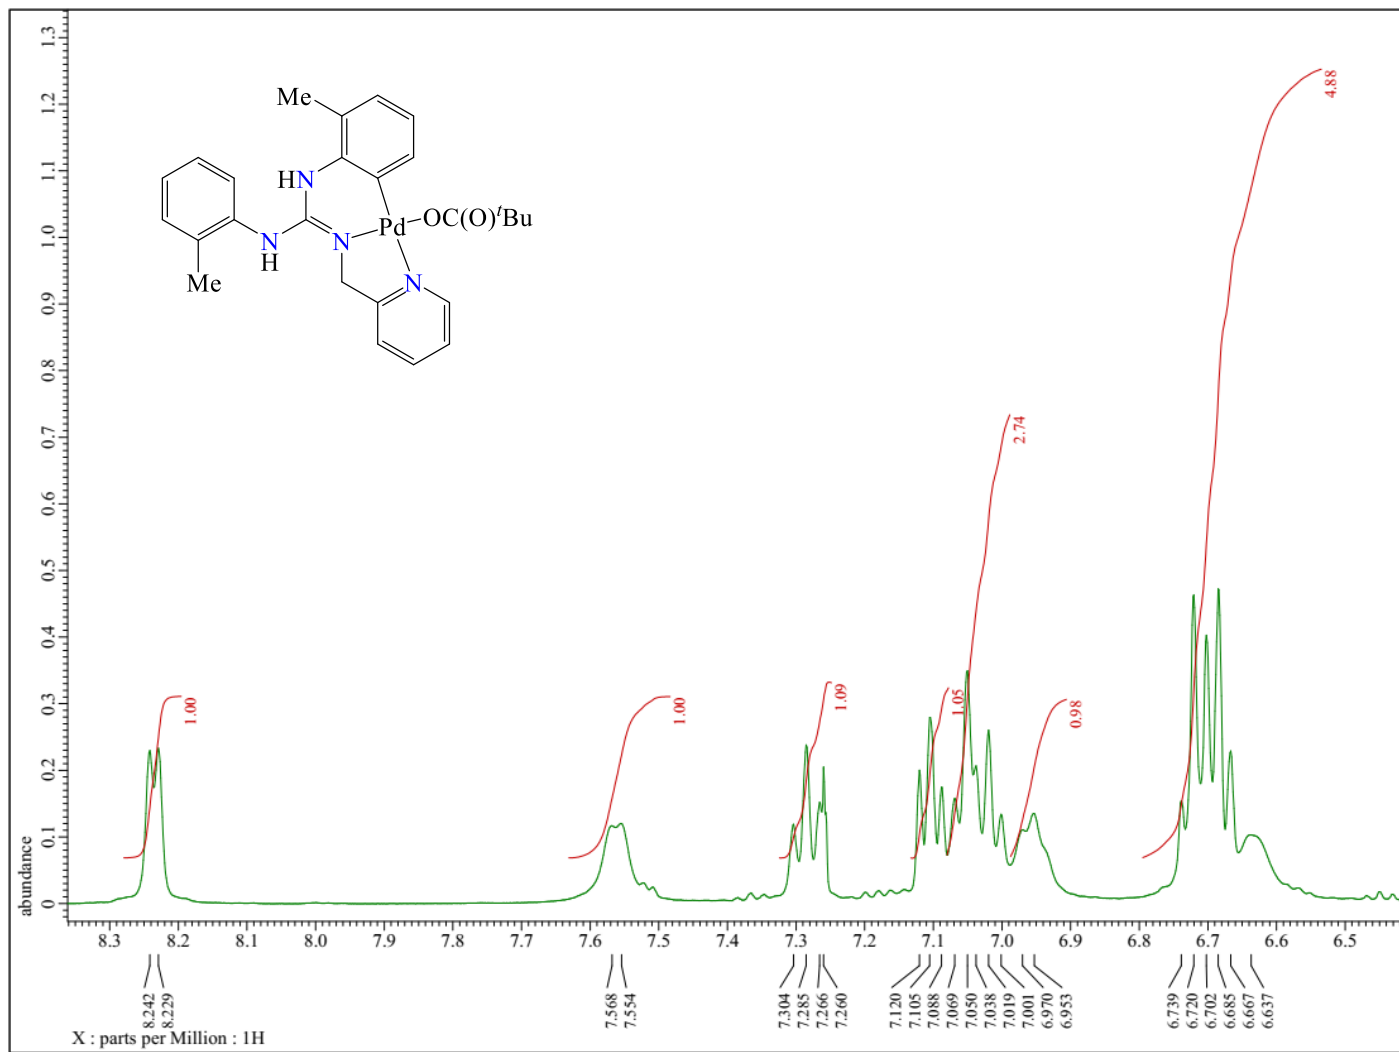

<sup>1</sup>H NMR (CDCl<sub>3</sub>, 400 MHz) spectrum of **5**·½ toluene·½ pivalic acid in indicated region.

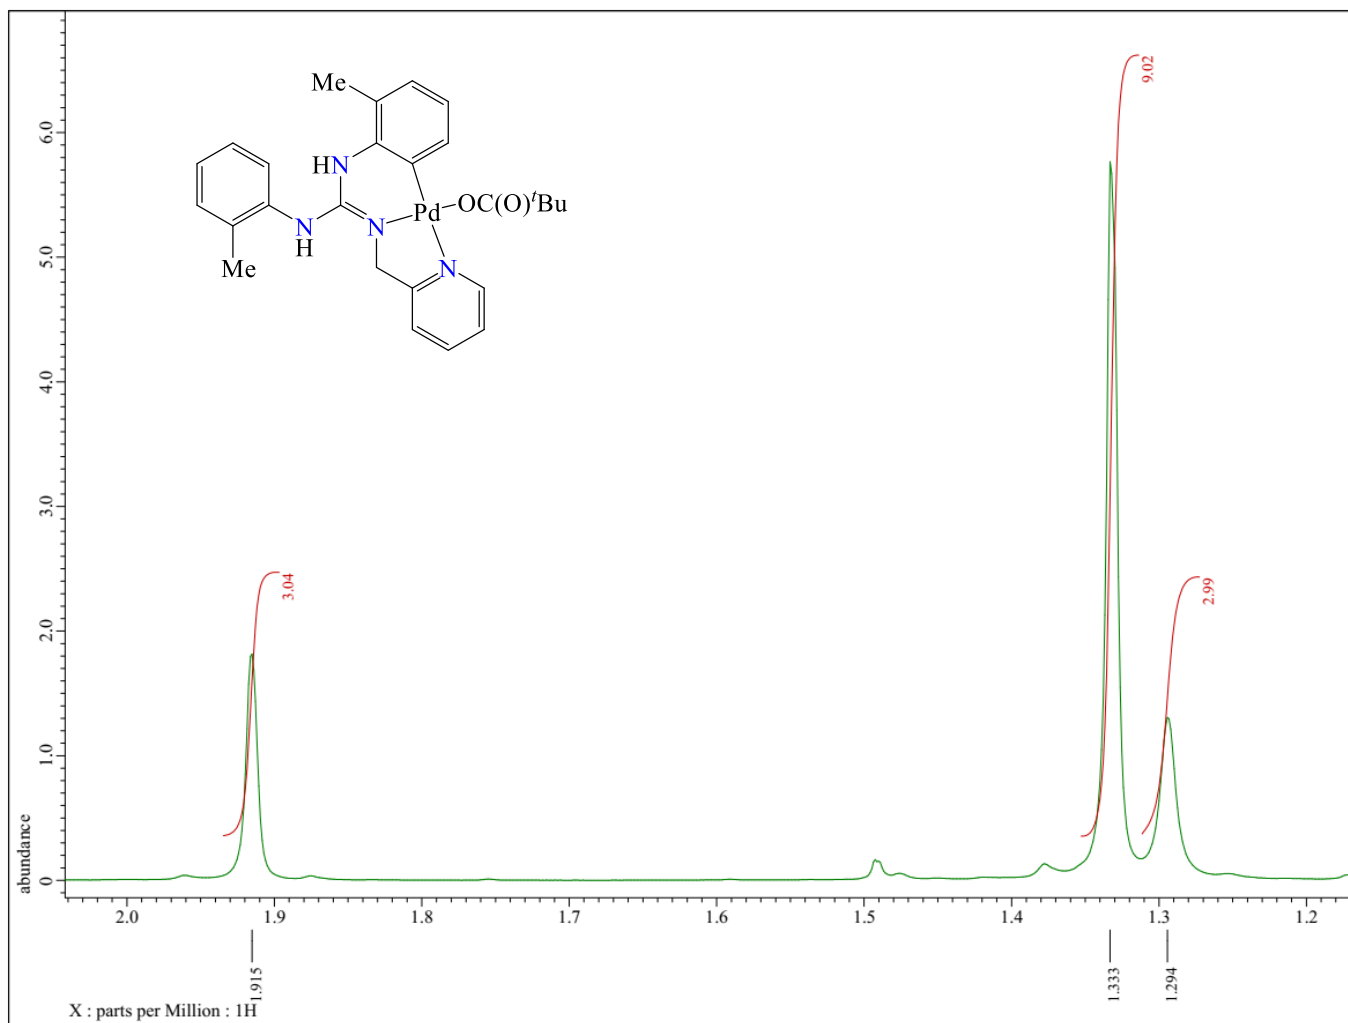

$^1\text{H}$  NMR ( $\text{CDCl}_3$ , 400 MHz) spectrum of **5**· $\frac{1}{2}$  toluene· $\frac{1}{2}$  pivalic acid in indicated region.

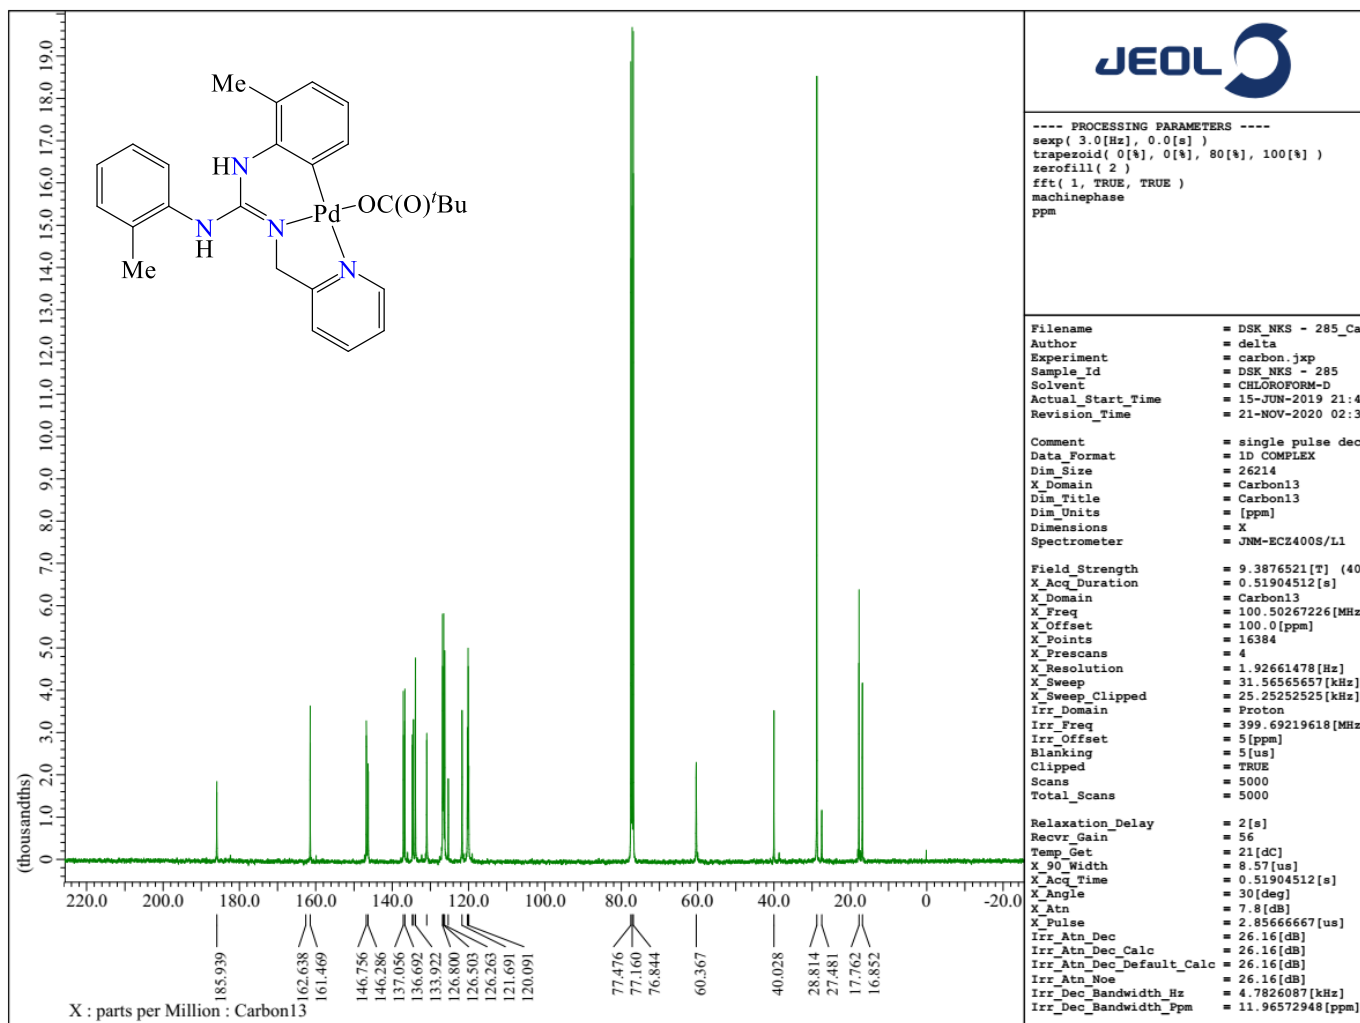

$^{13}\text{C}\{^1\text{H}\}$  NMR ( $\text{CDCl}_3$ , 100.5 MHz) spectrum of **5**- $\frac{1}{2}$  toluene- $\frac{1}{2}$  pivalic acid in indicated region.

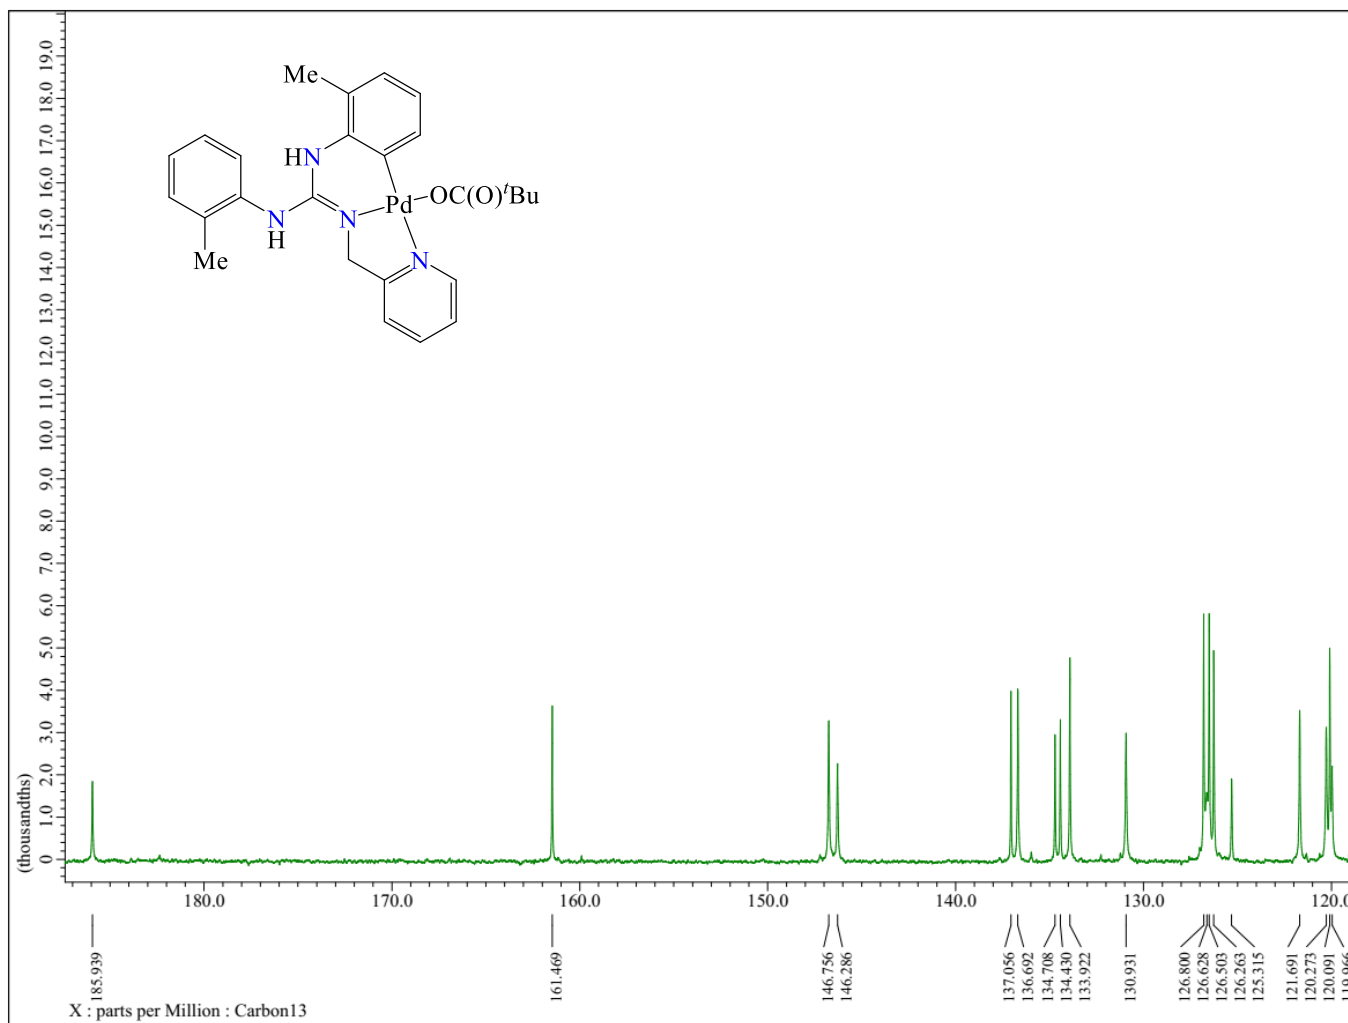

$^{13}\text{C}\{^1\text{H}\}$  NMR (CDCl<sub>3</sub>, 100.5 MHz) spectrum of **5**·½ toluene·½ pivalic acid in indicated region.



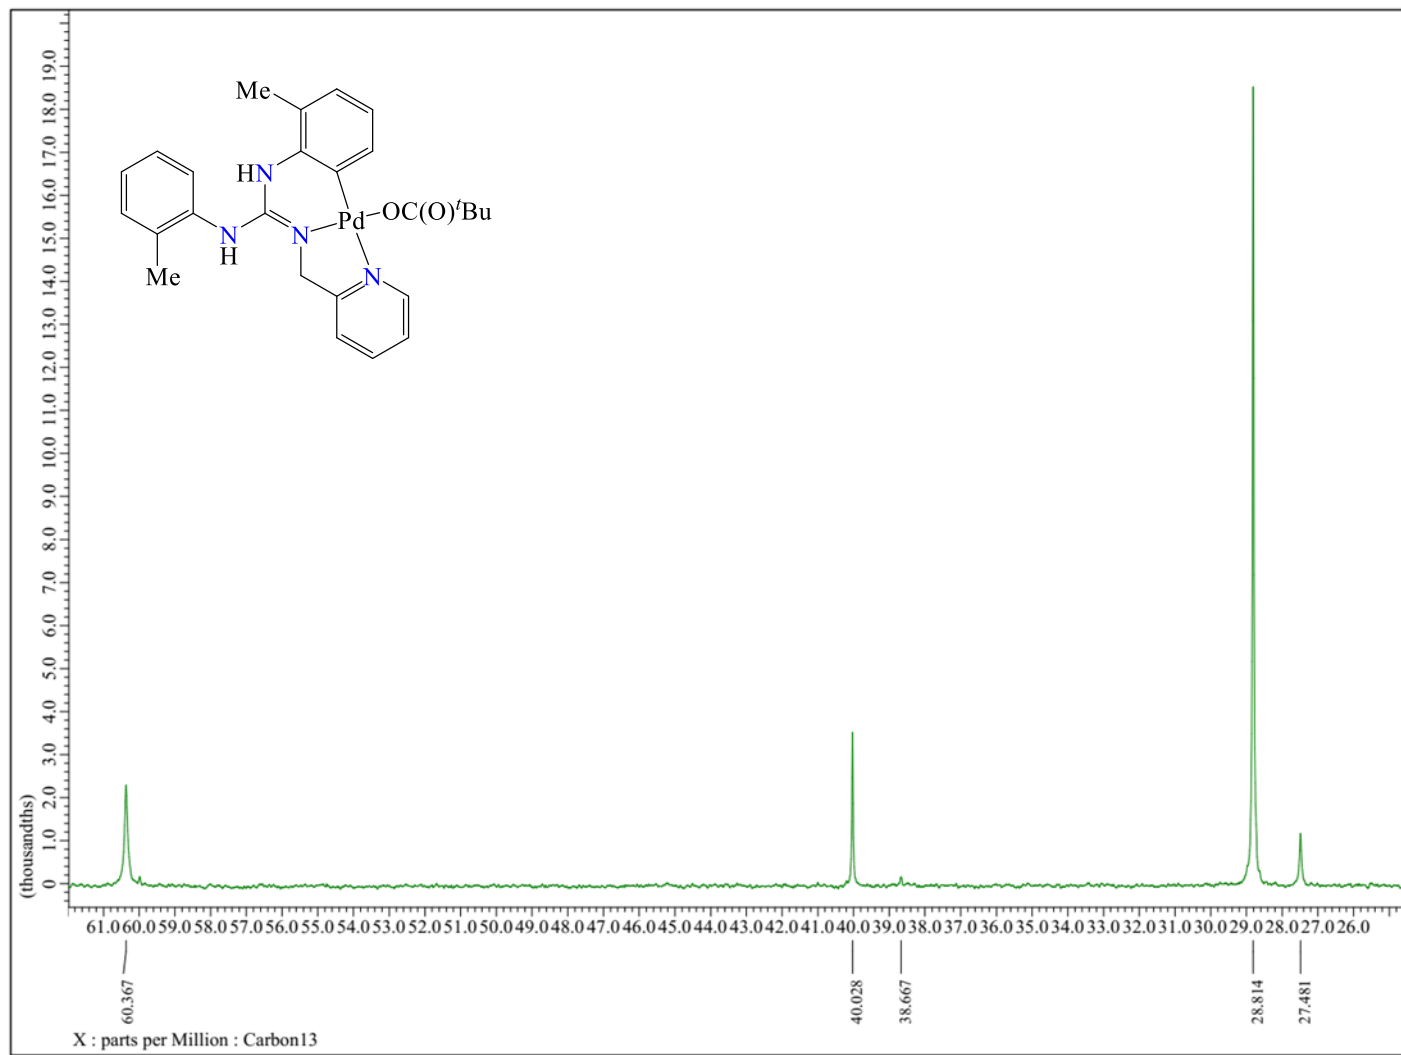

$^{13}\text{C}\{^1\text{H}\}$  NMR ( $\text{CDCl}_3$ , 100.5 MHz) spectrum of **5**· $\frac{1}{2}$  toluene· $\frac{1}{2}$  pivalic acid in indicated region.

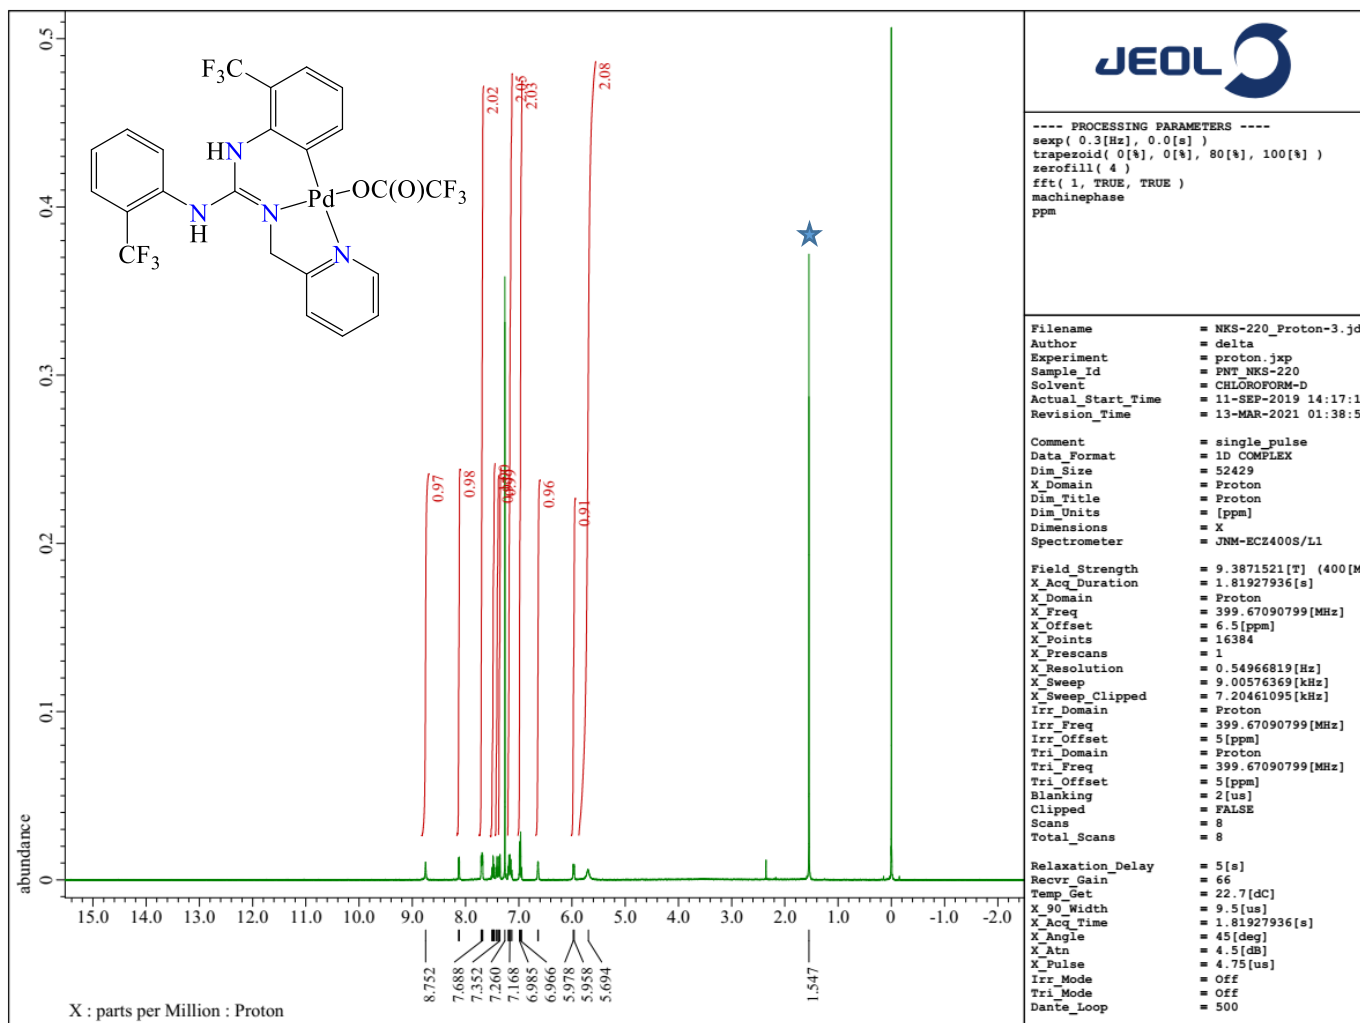

$^1\text{H}$  NMR ( $\text{CDCl}_3$ , 400 MHz) spectrum of **6**. ★ symbol indicate protons of residual water.

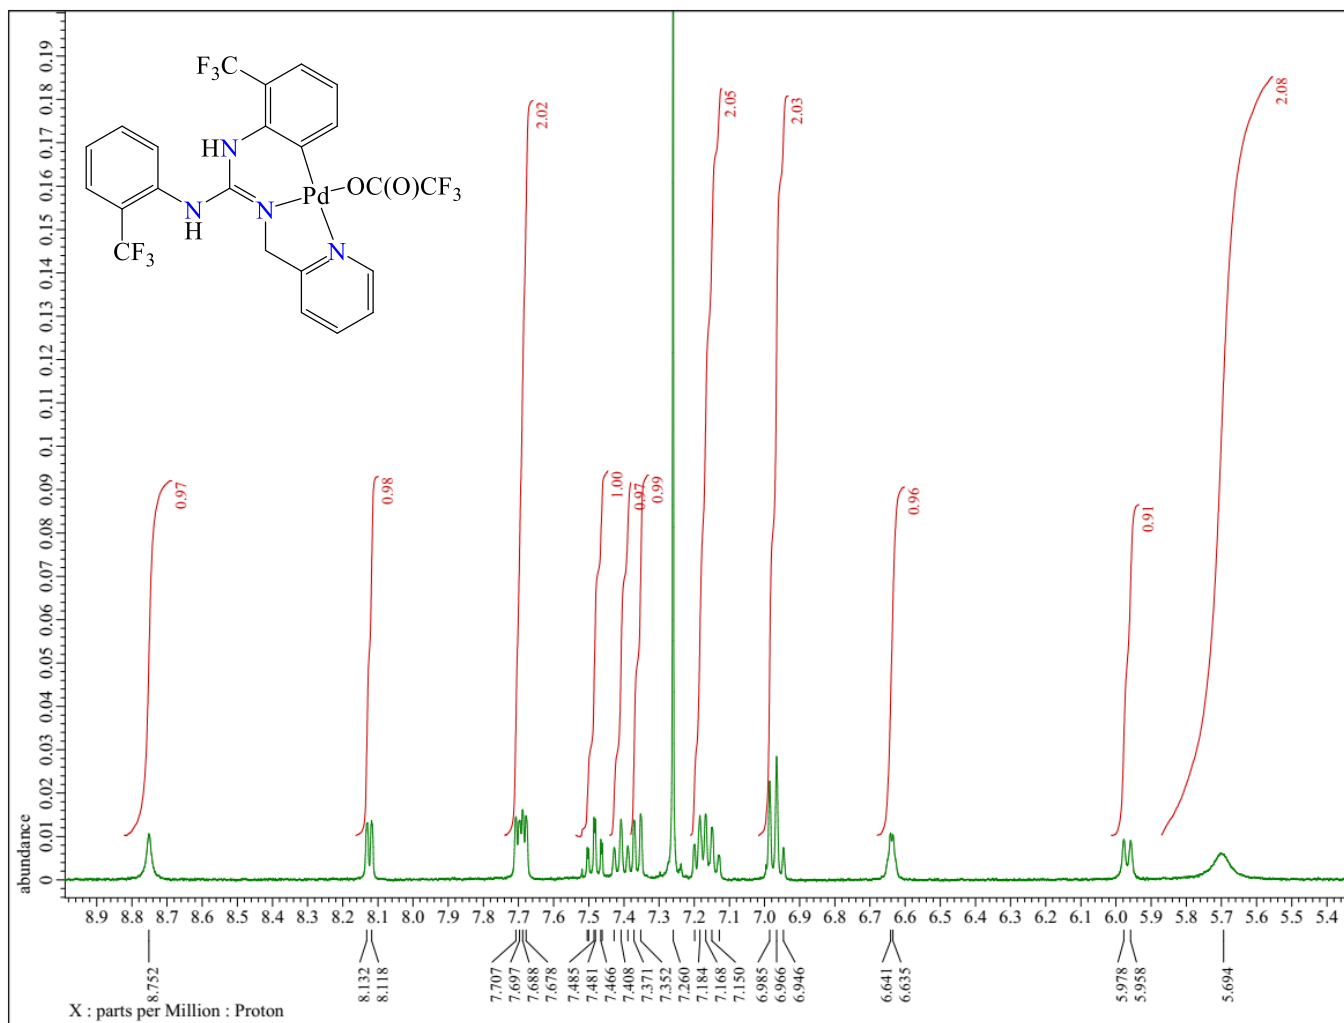

<sup>1</sup>H NMR (CDCl<sub>3</sub>, 400 MHz) spectrum of **6** in indicated region.

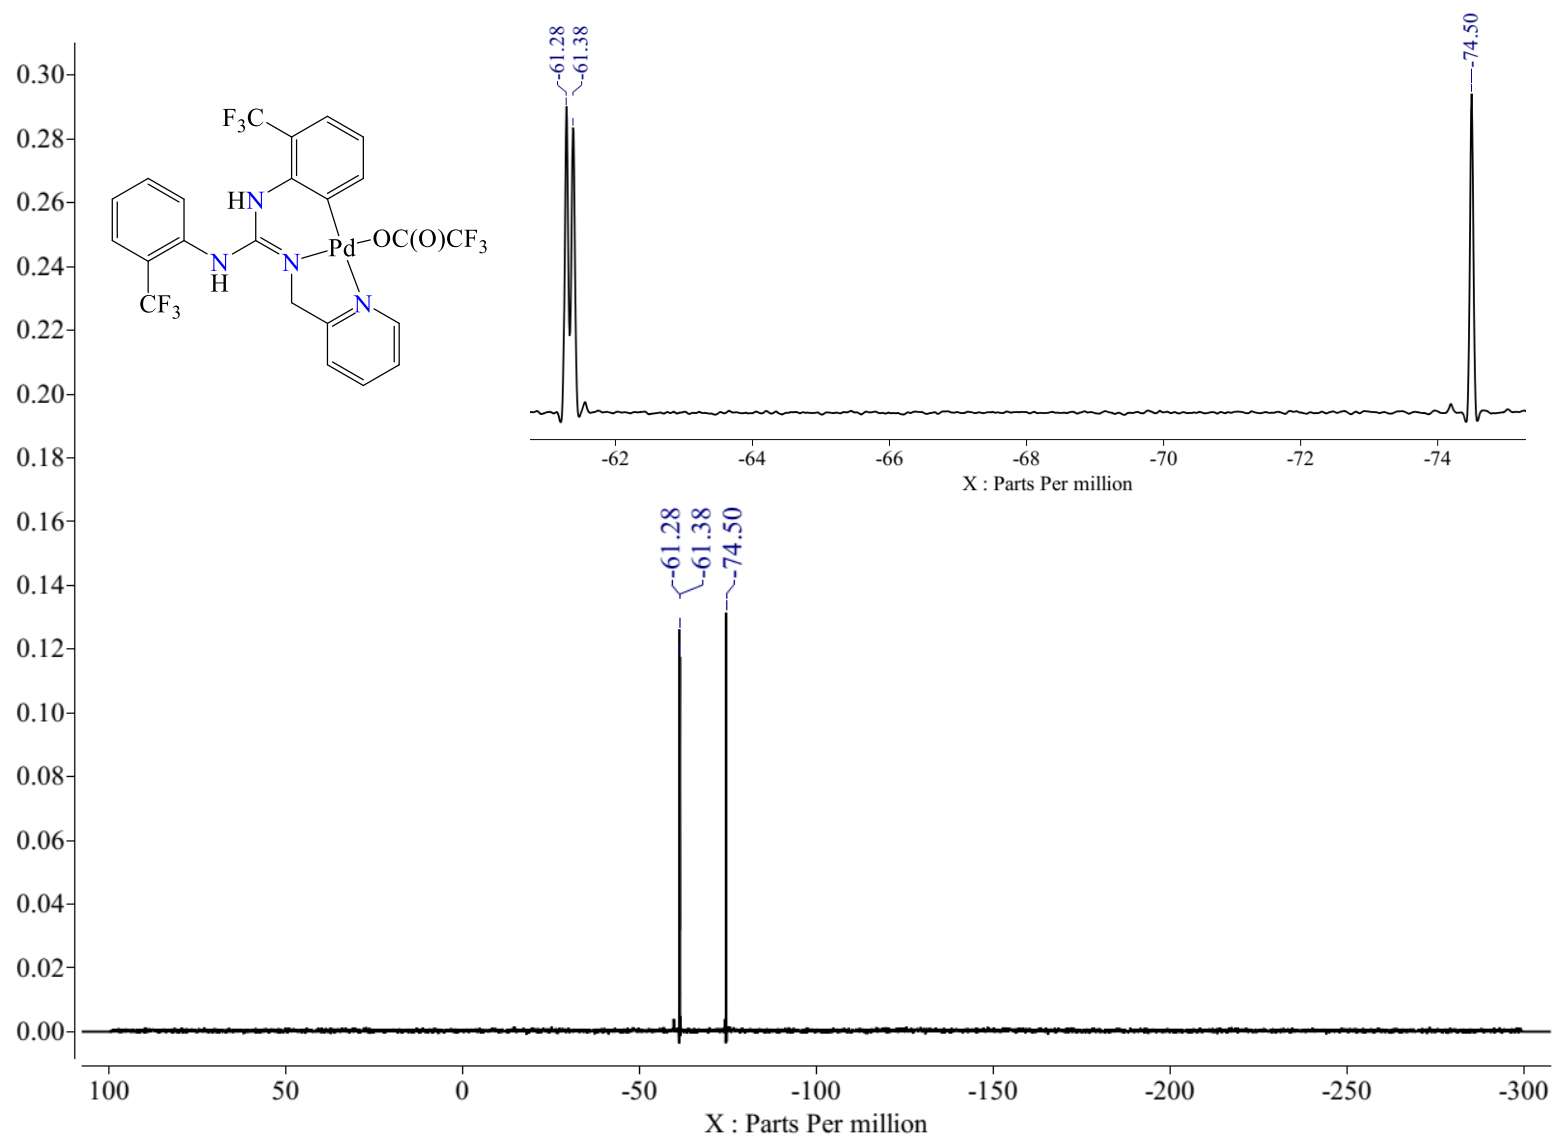

$^{19}\text{F}\{^1\text{H}\}$  NMR ( $\text{CDCl}_3$ , 376.5 MHz) spectrum of **6**.

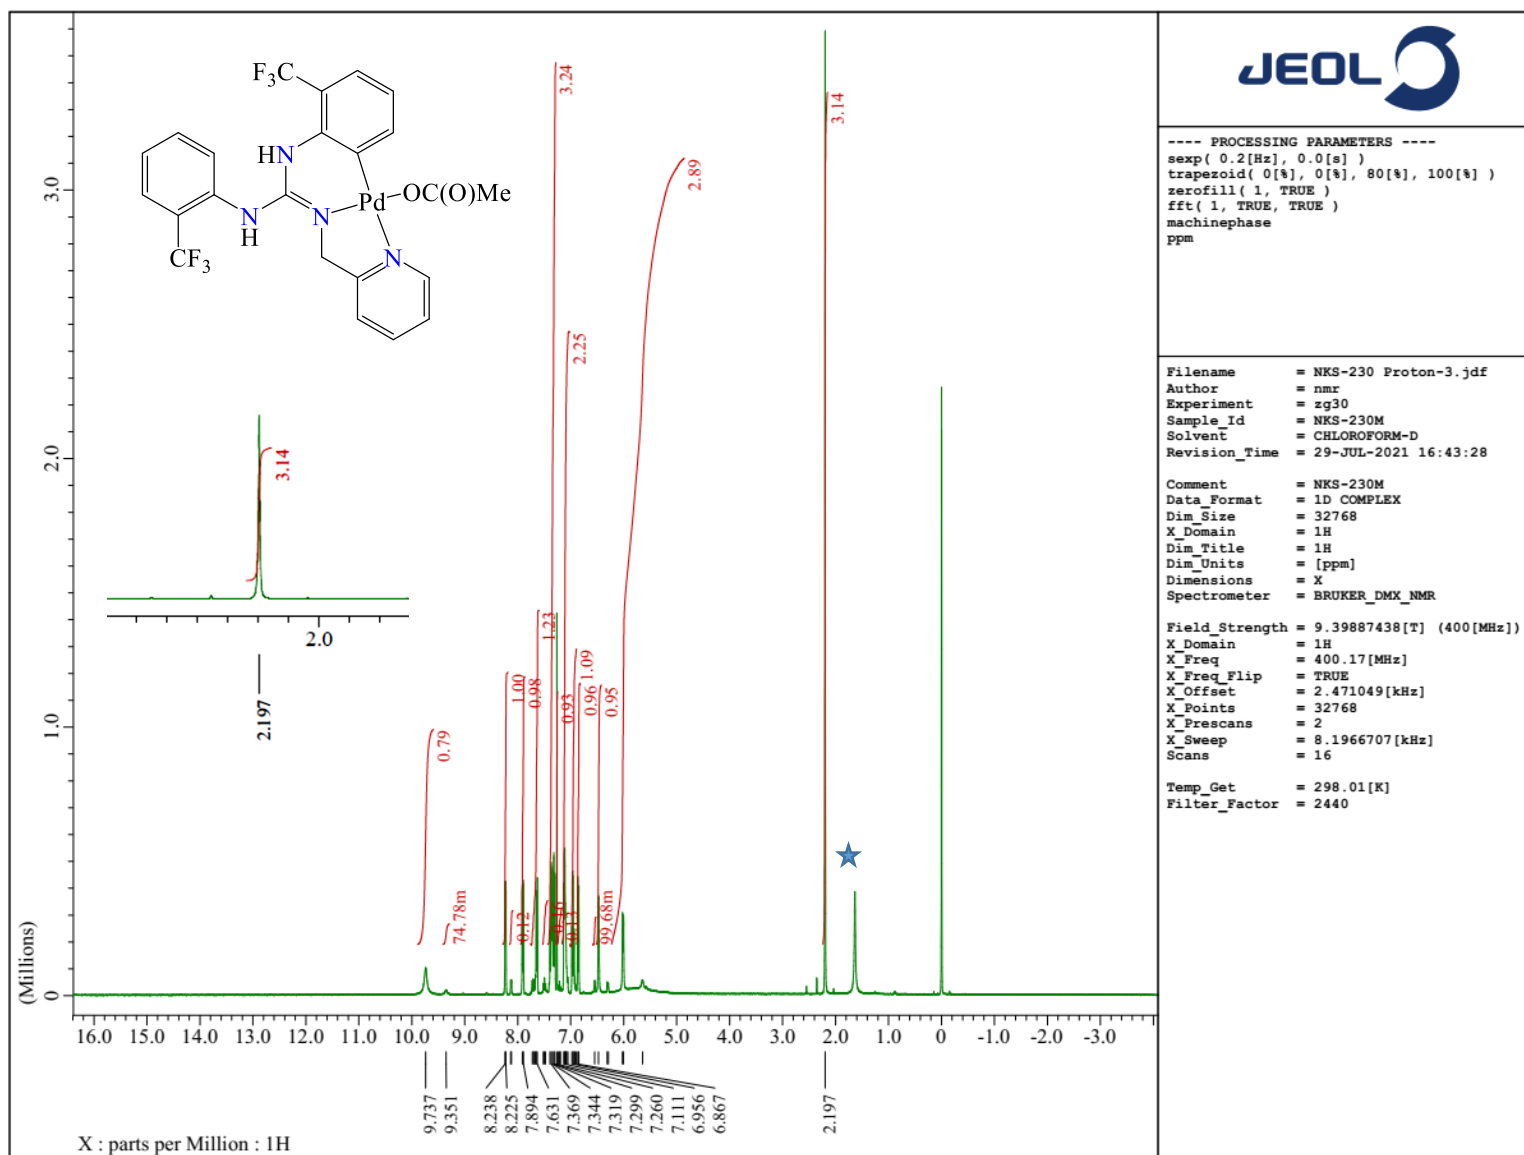

$^1\text{H}$  NMR ( $\text{CDCl}_3$ , 400 MHz) spectrum of **7** + **9**. The  $\star$  symbol indicates protons of residual water.



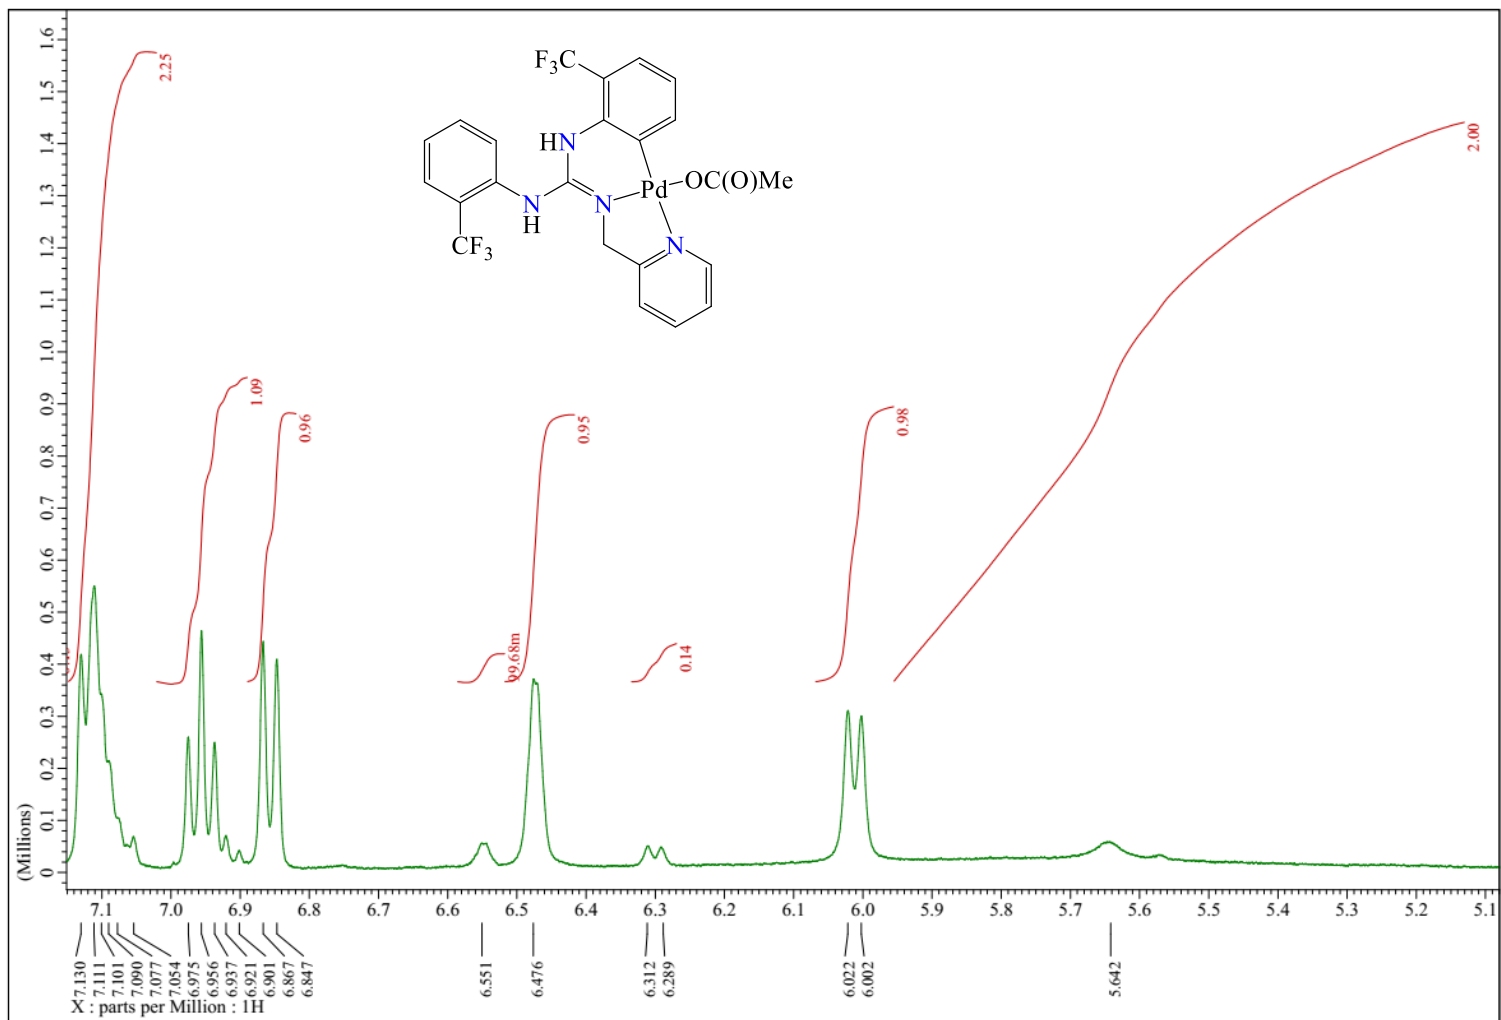

<sup>1</sup>H NMR (CDCl<sub>3</sub>, 400 MHz) spectrum of **7** + **9** in indicated region.

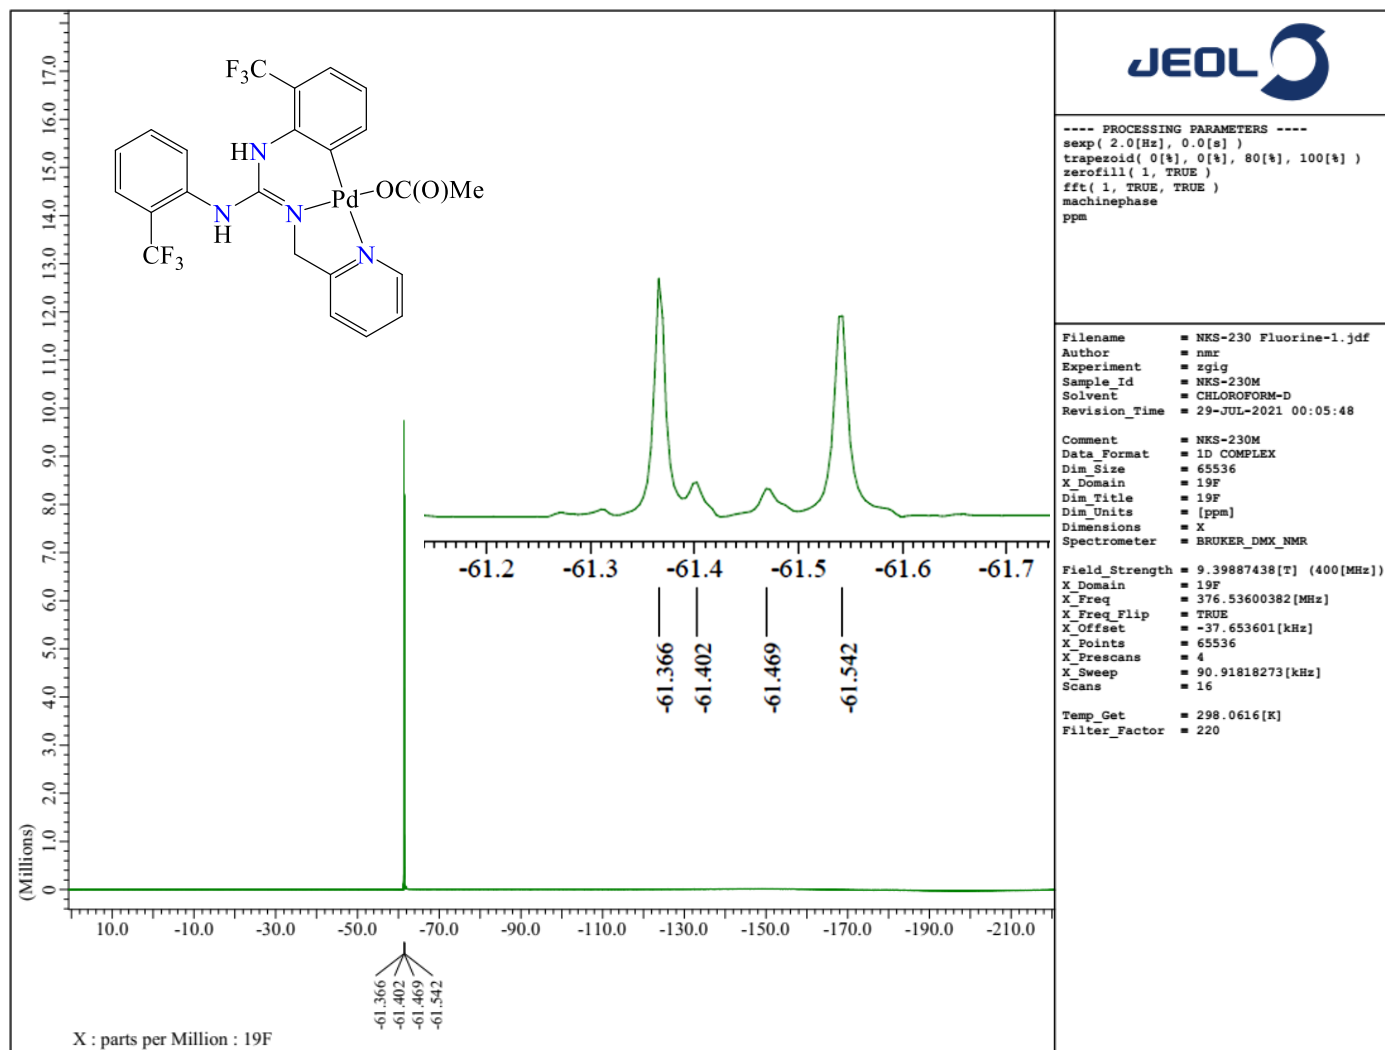

$^{19}\text{F}\{^1\text{H}\}$  NMR ( $\text{CDCl}_3$ , 376.5 MHz) spectrum of **7** + **9**.



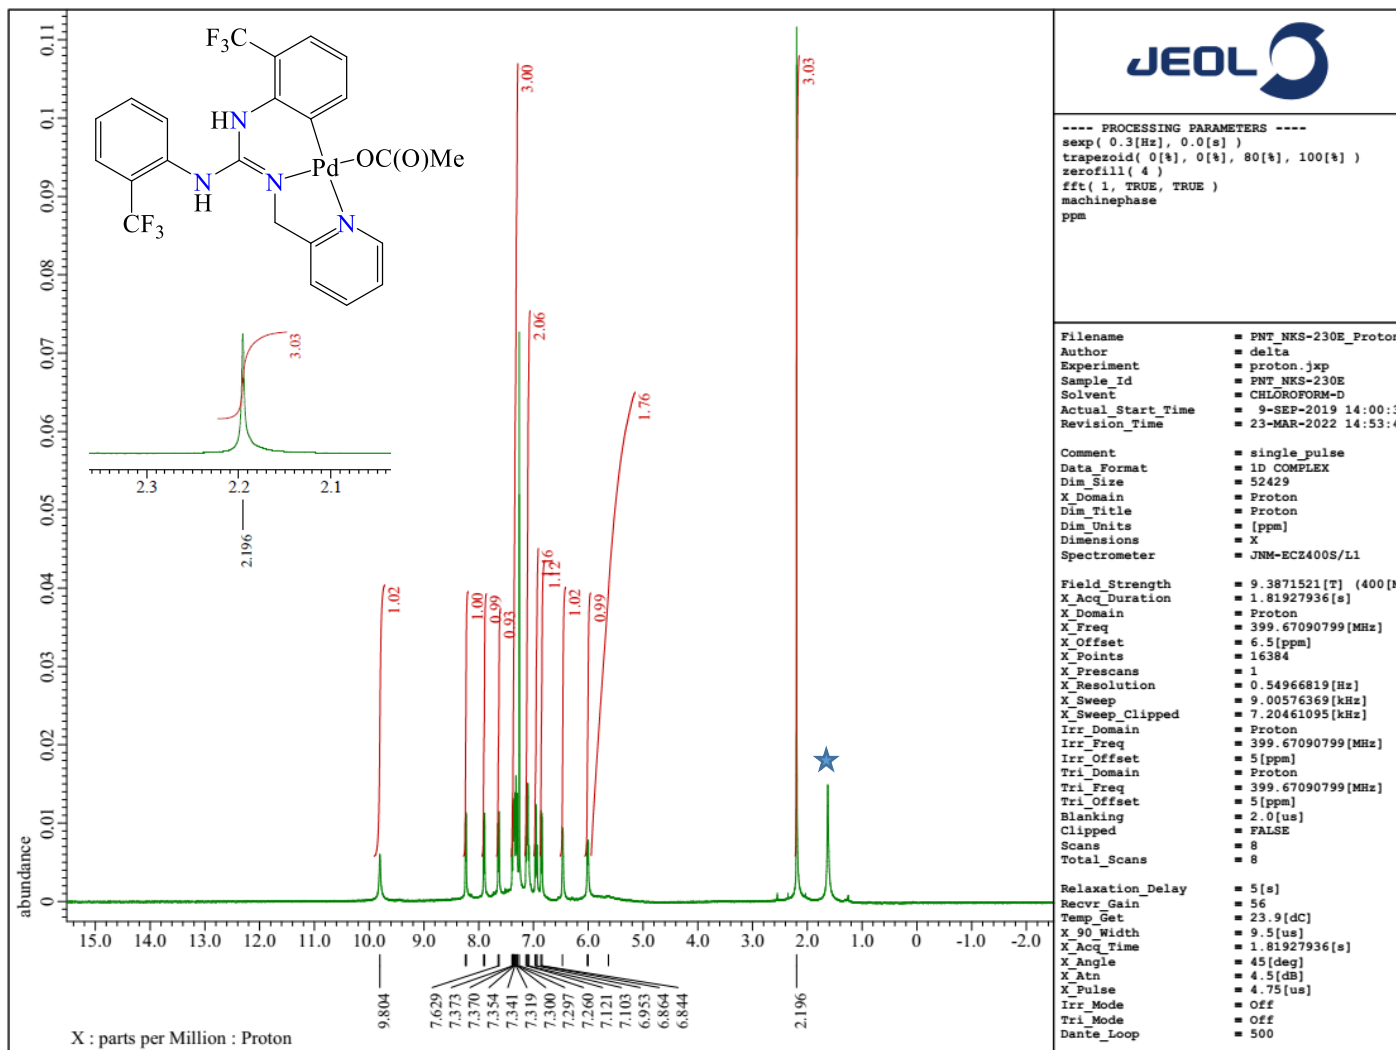

$^1\text{H}$  NMR ( $\text{CDCl}_3$ , 400 MHz) spectrum of **7**. The ★ symbol indicates protons of residual water.

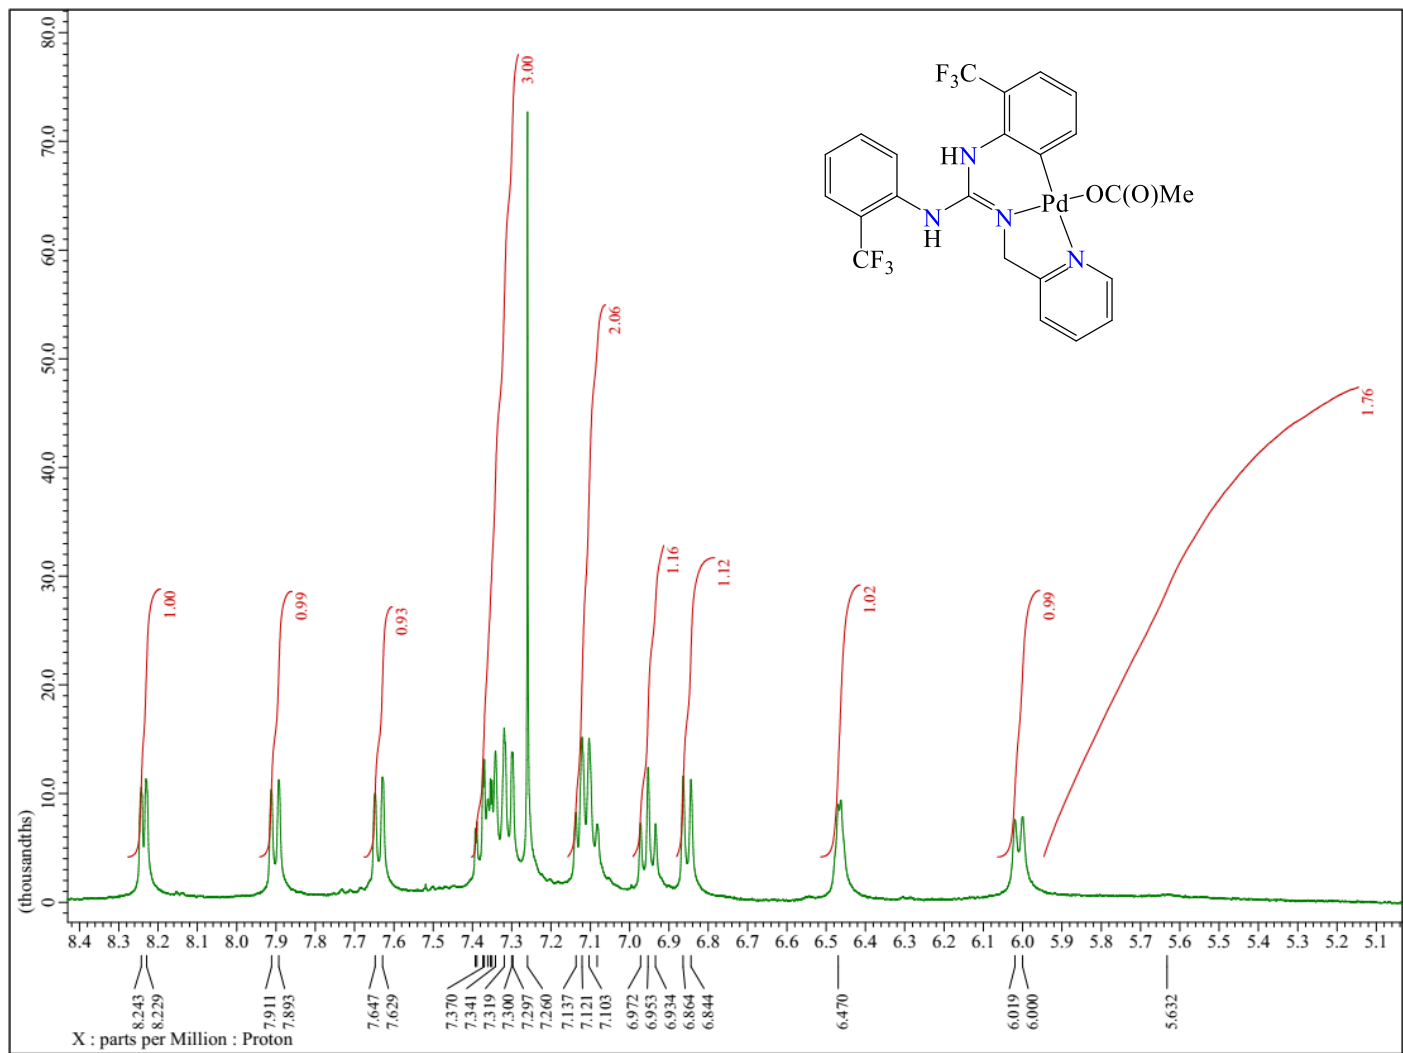

$^1\text{H NMR}$  (CDCl<sub>3</sub>, 400 MHz) spectrum of **7** in indicated region.

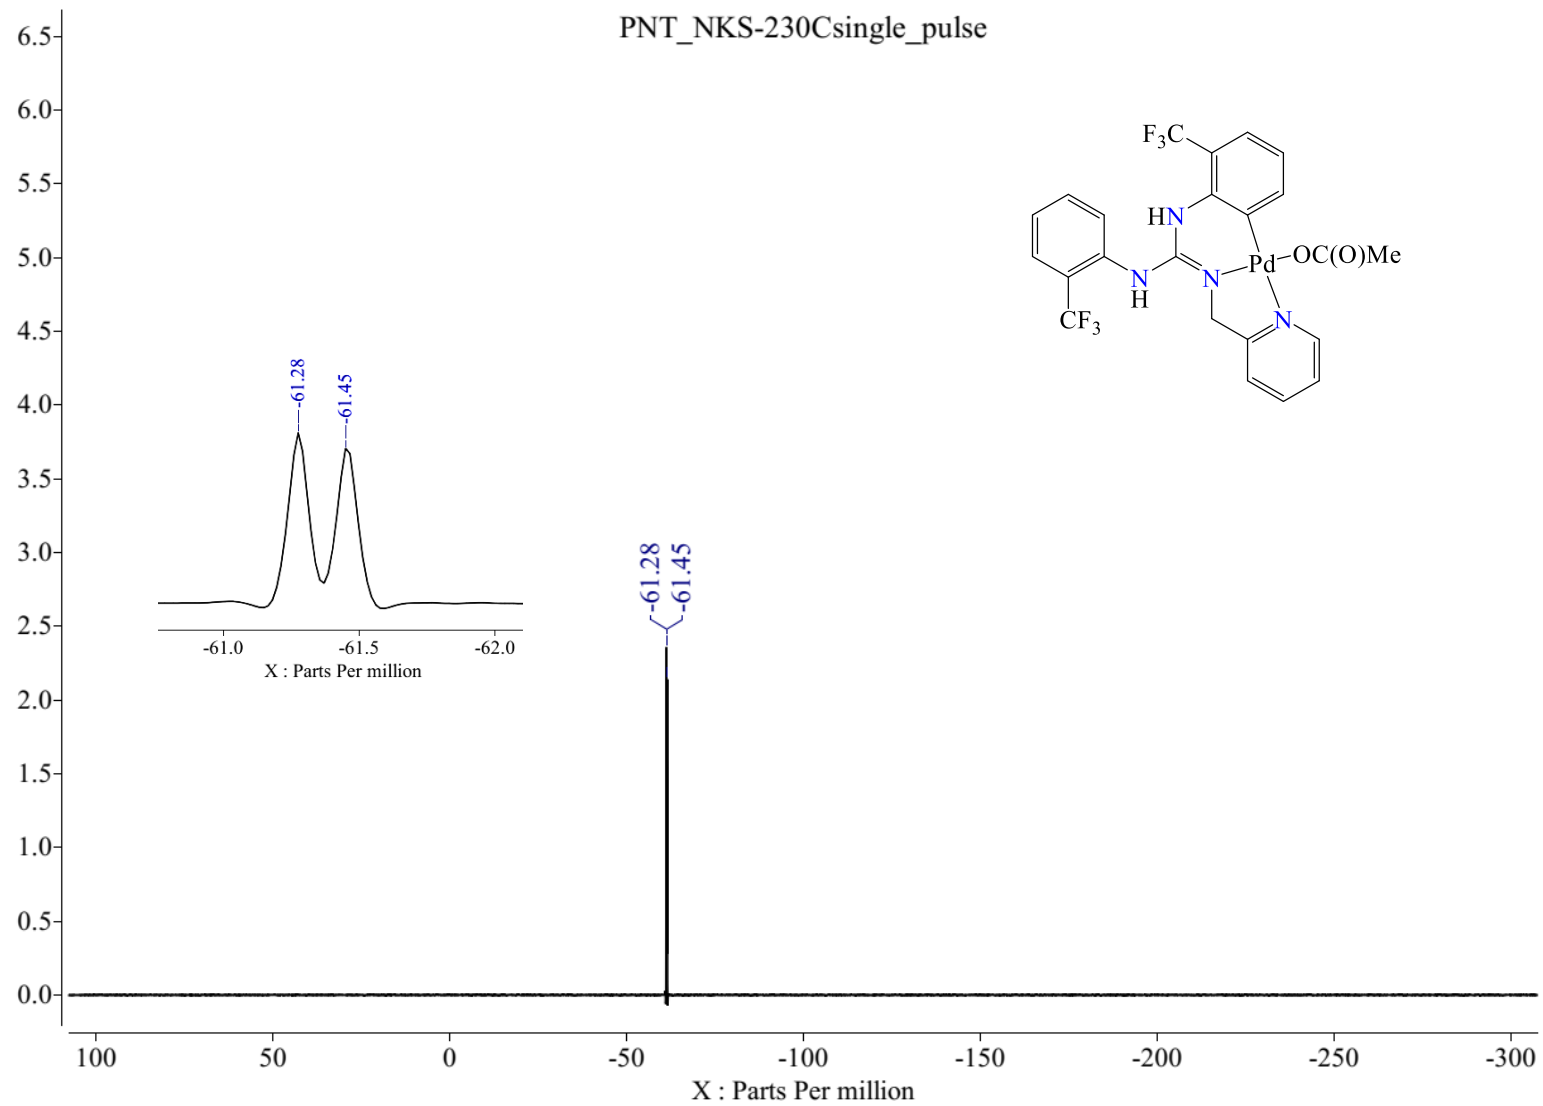

$^{19}\text{F}\{^1\text{H}\}$  NMR ( $\text{CDCl}_3$ , 376.5 MHz) spectrum of **7**.

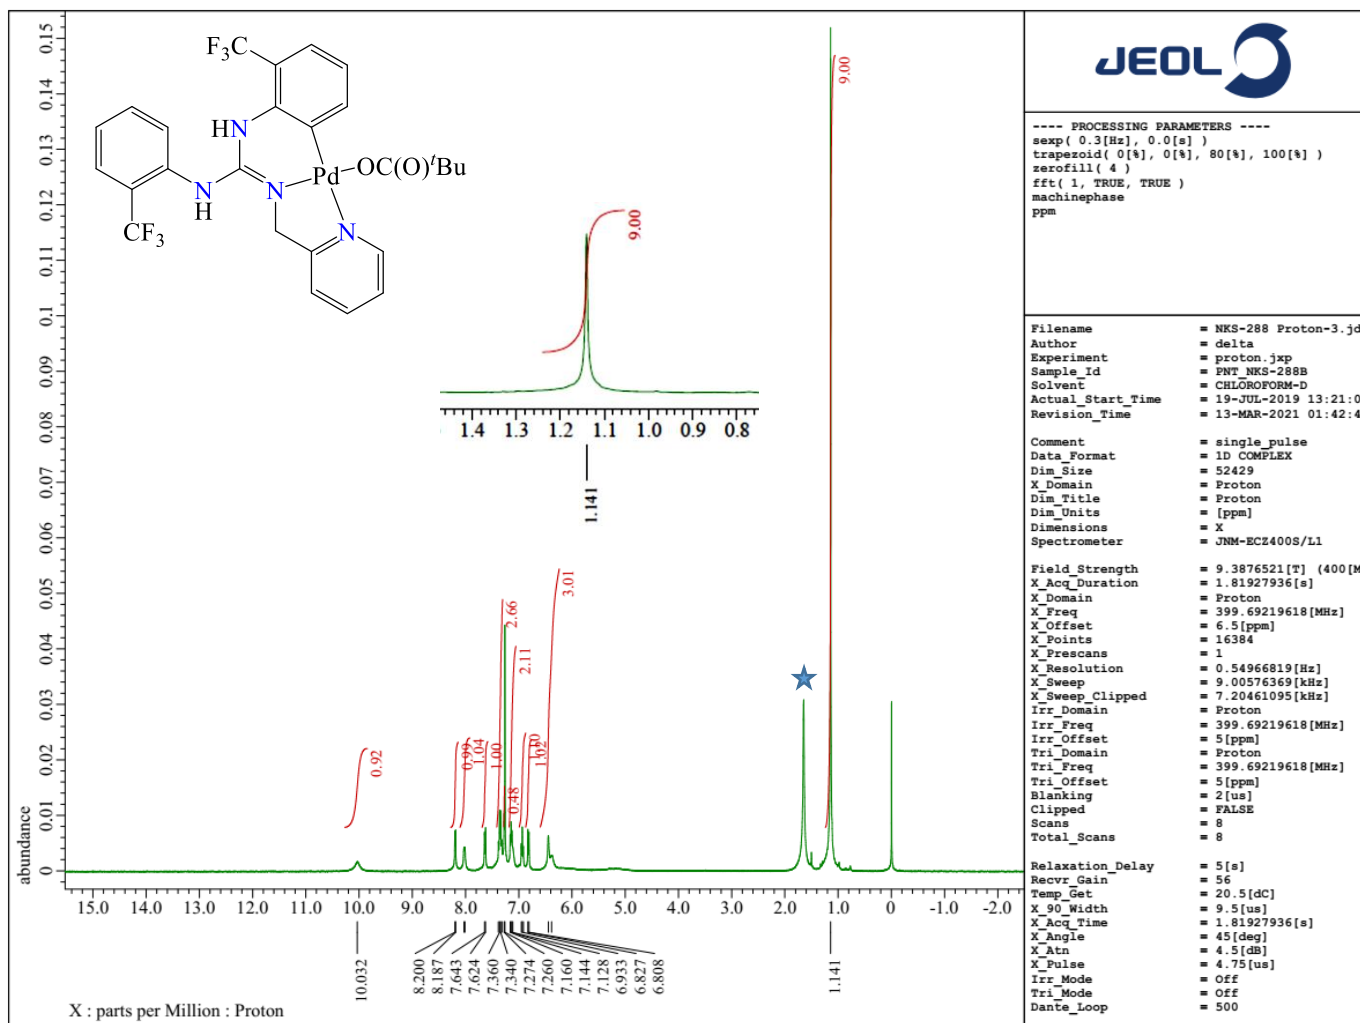

<sup>1</sup>H NMR (CDCl<sub>3</sub>, 400 MHz) spectrum of **8**. The ★ symbol indicates protons of residual water.

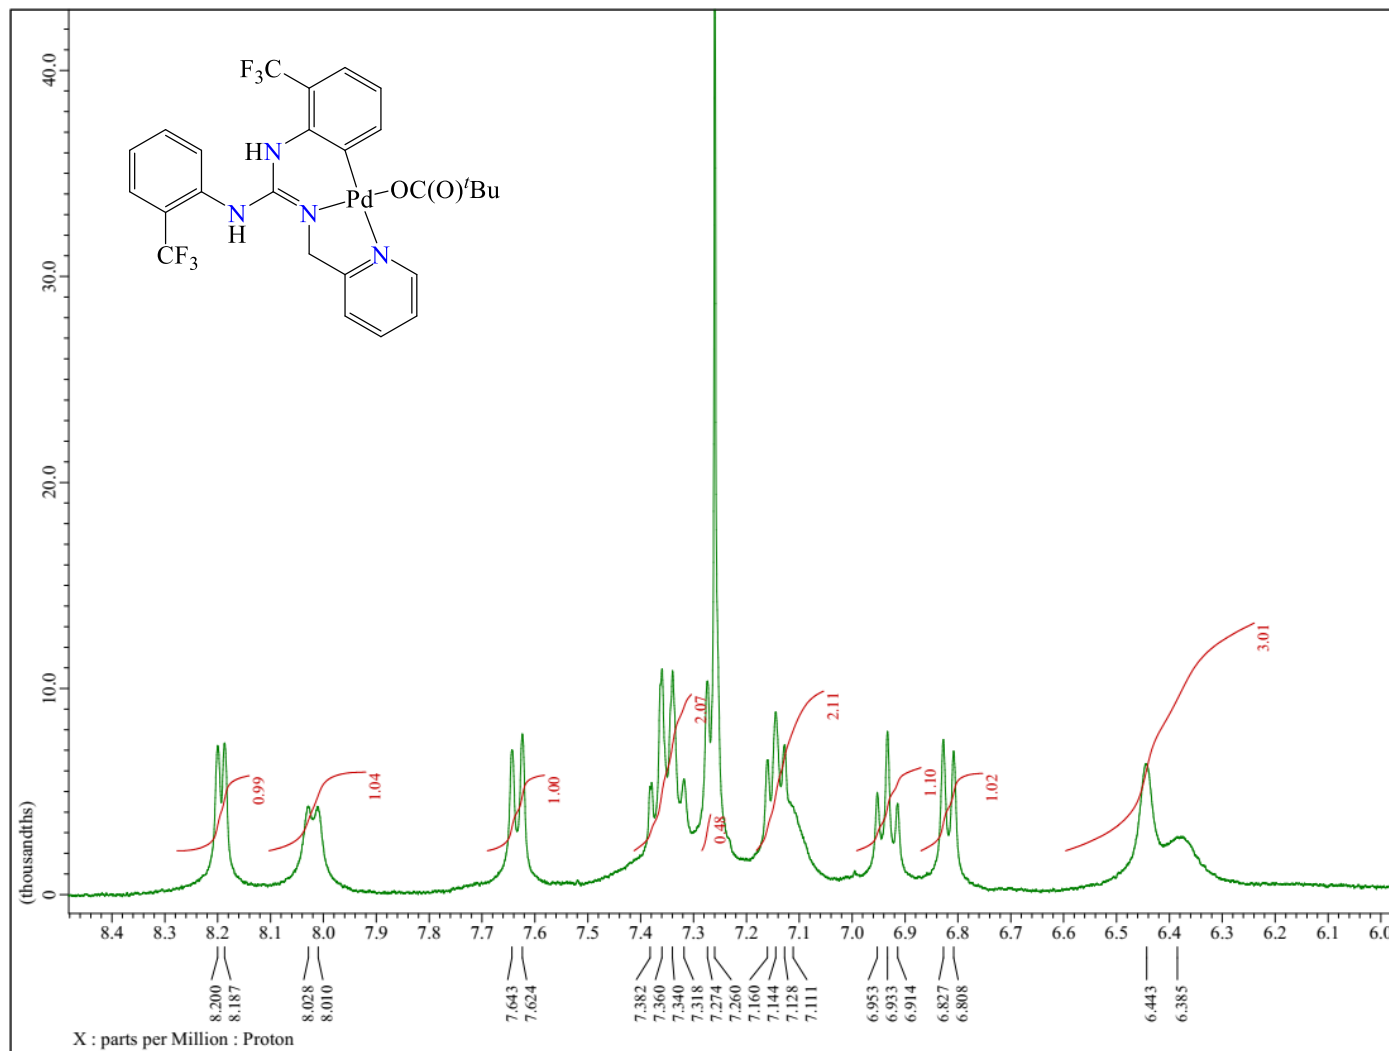

$^1\text{H}$  NMR (CDCl<sub>3</sub>, 400 MHz) spectrum of **8** in indicated region.

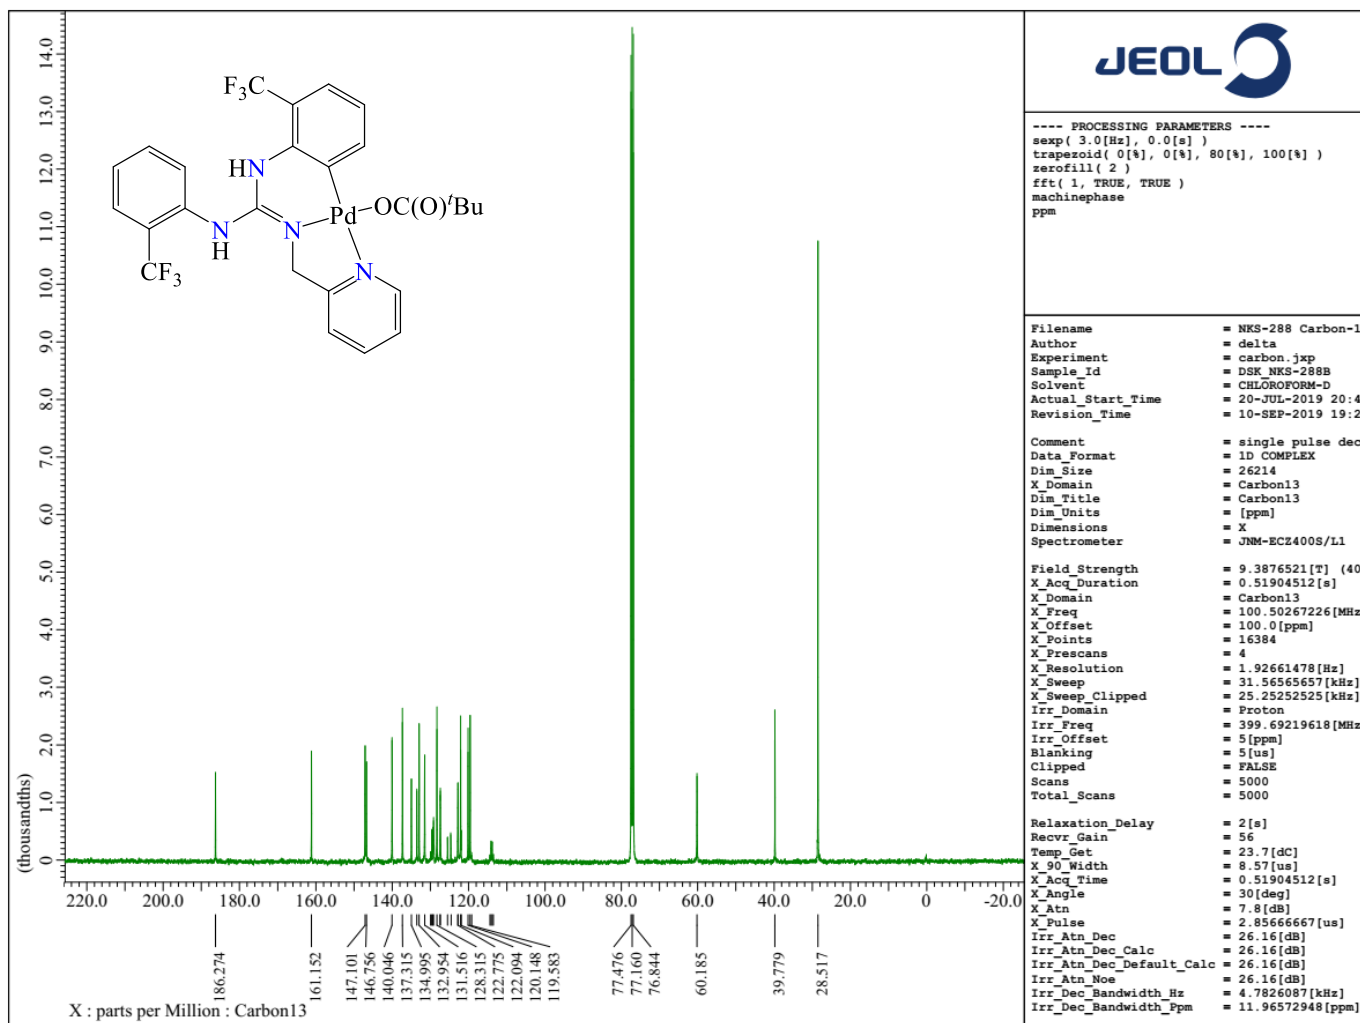

$^{13}\text{C}\{^1\text{H}\}$  NMR ( $\text{CDCl}_3$ , 100.5 MHz) spectrum of **8**.

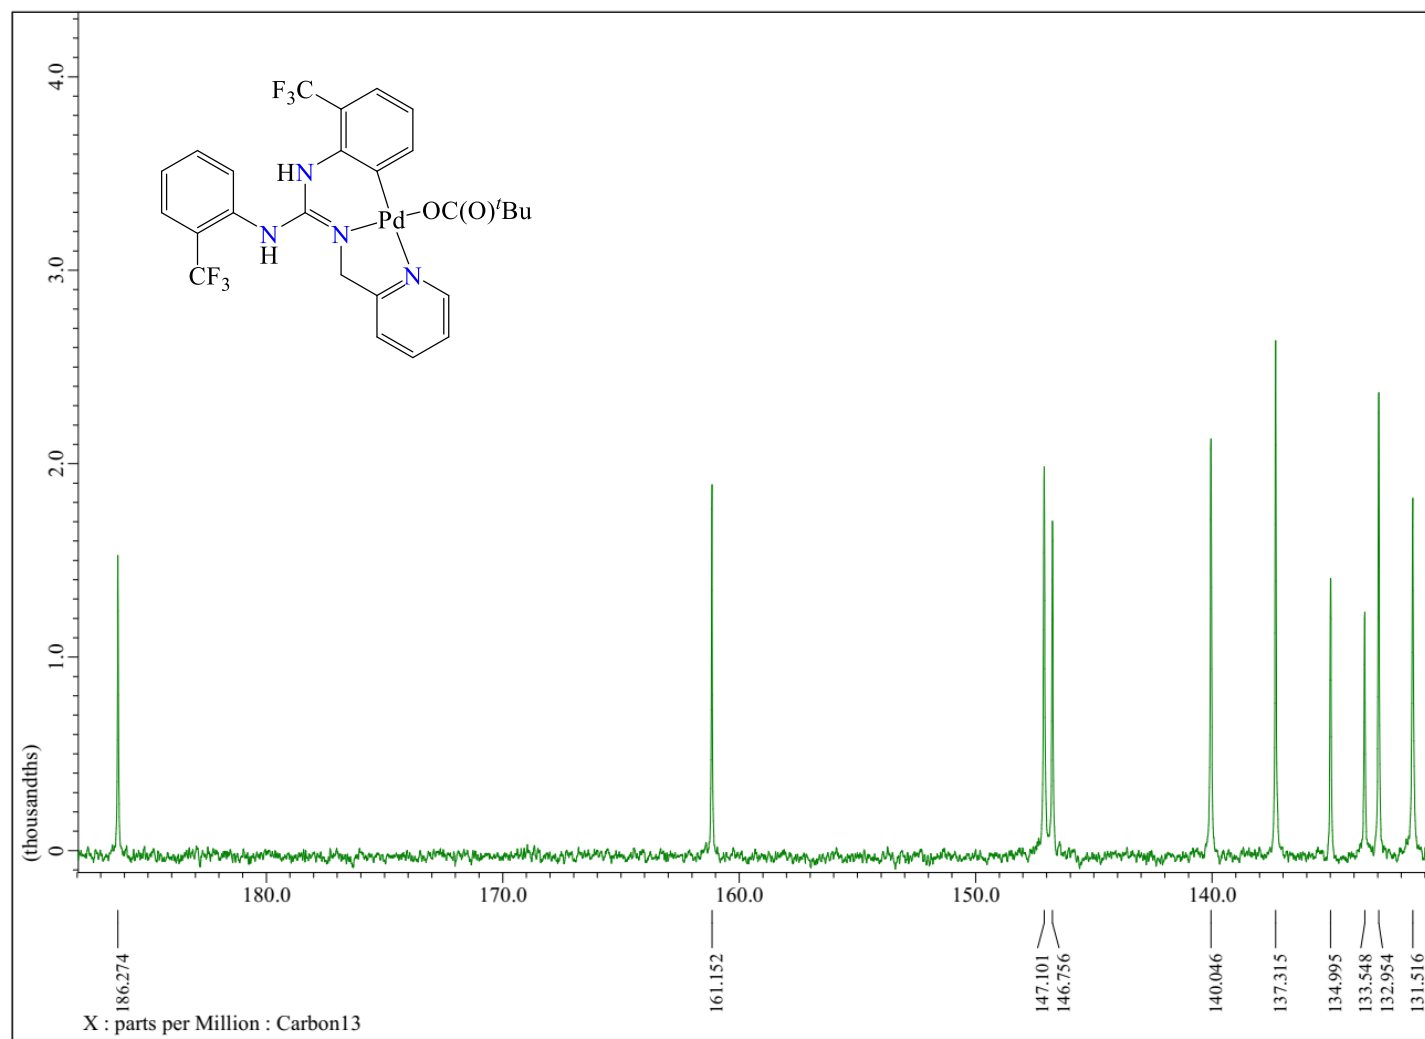

$^{13}\text{C}\{^1\text{H}\}$  NMR ( $\text{CDCl}_3$ , 100.5 MHz) spectrum of **8** in indicated region.

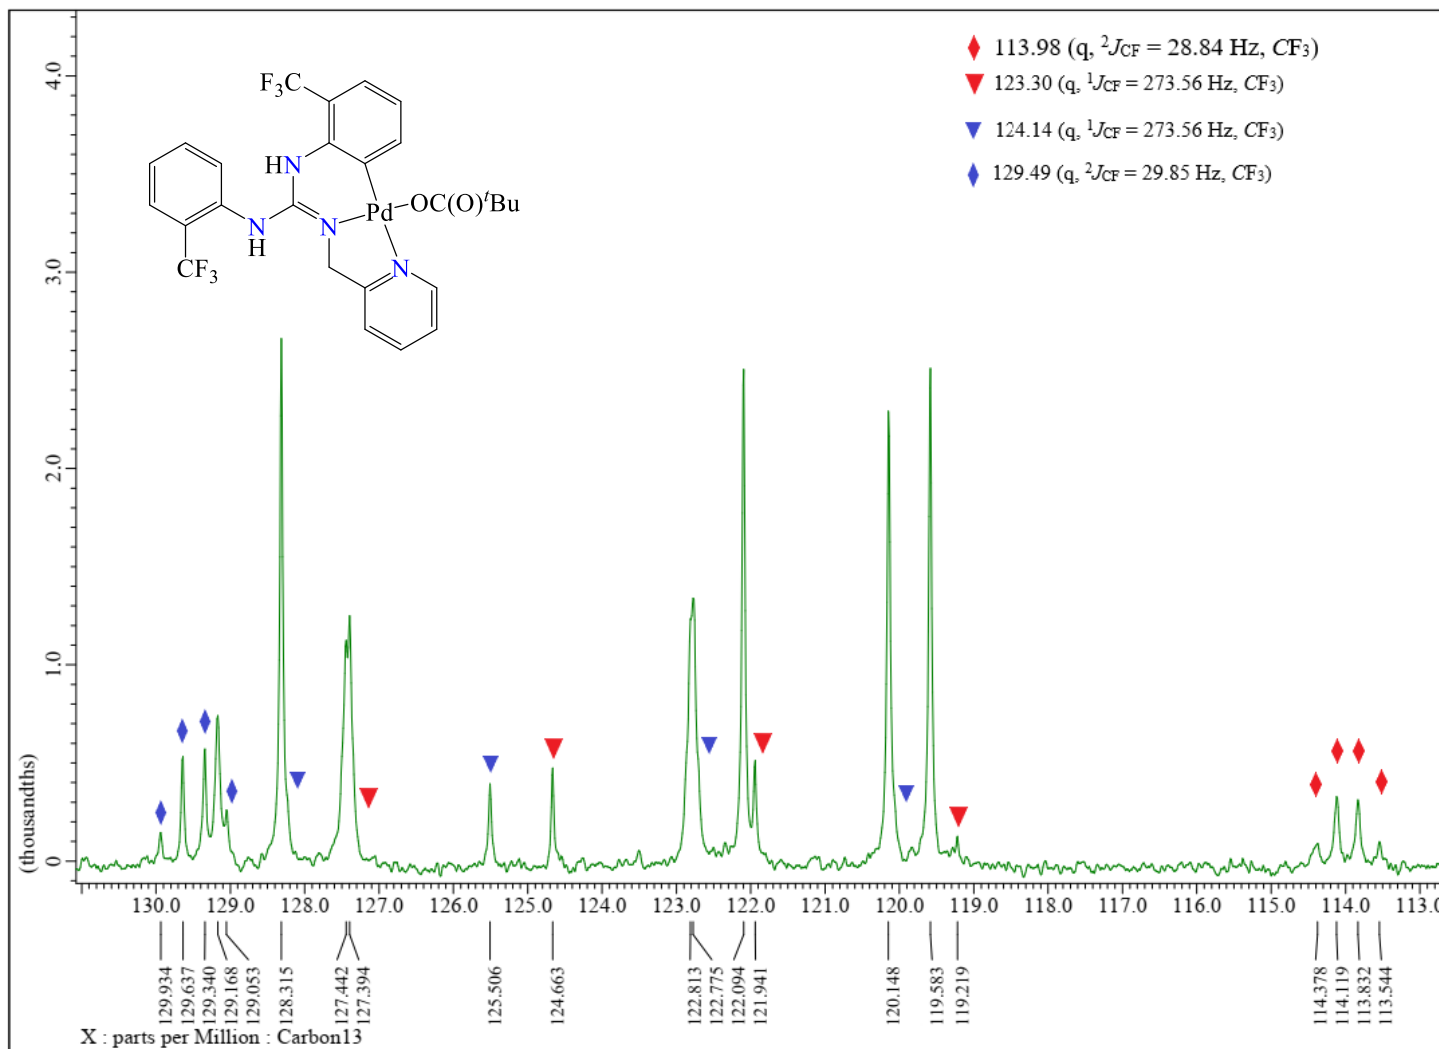

$^{13}\text{C}\{^1\text{H}\}$  NMR ( $\text{CDCl}_3$ , 100.5 MHz) spectrum of **8** in indicated region.



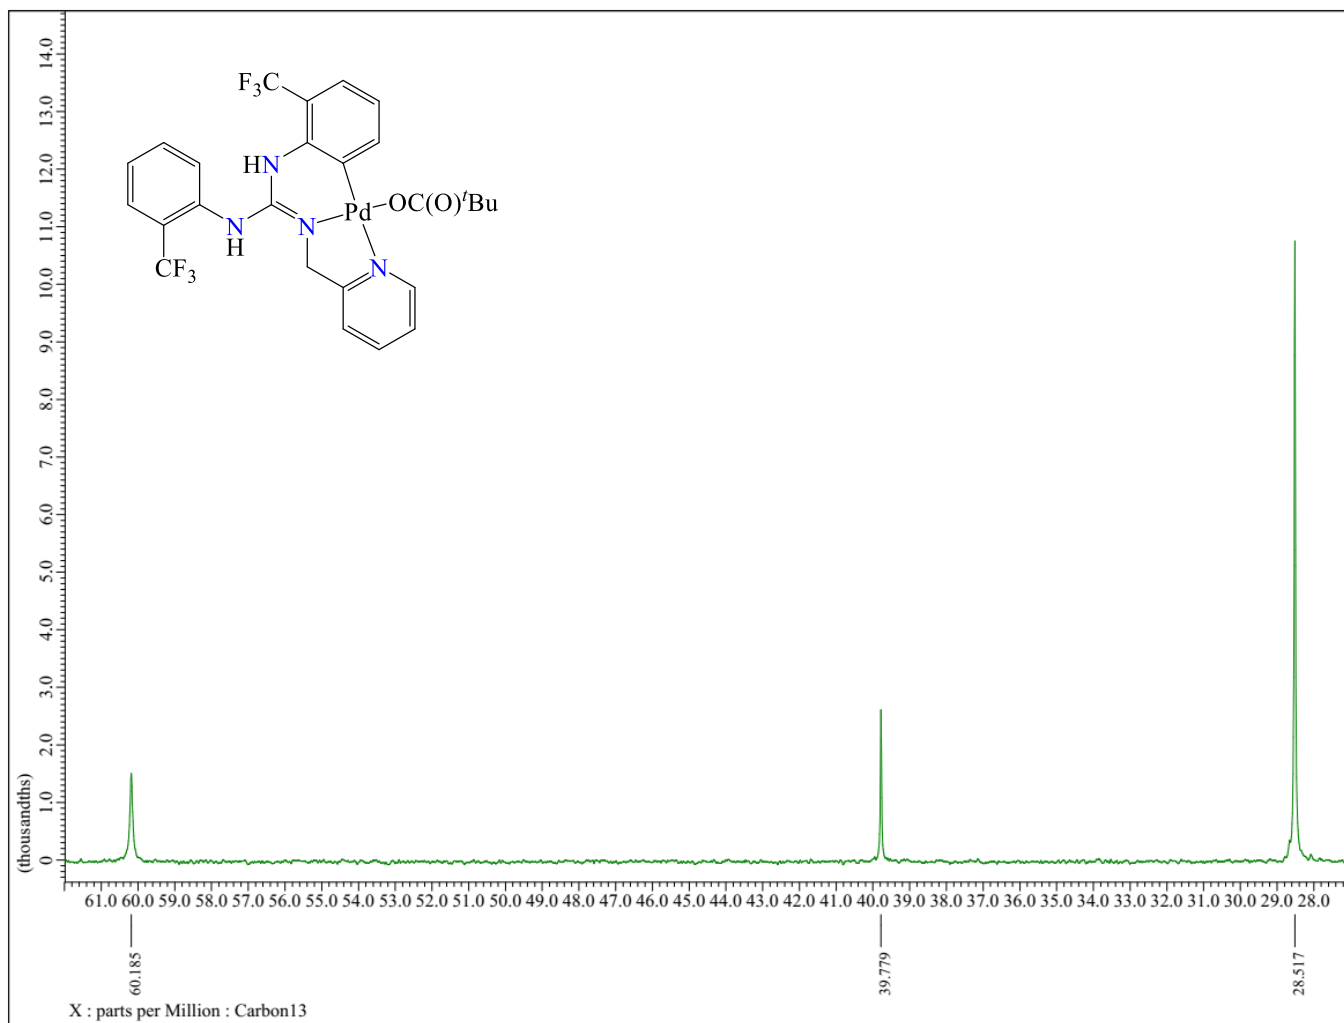

$^{13}\text{C}\{^1\text{H}\}$  NMR ( $\text{CDCl}_3$ , 100.5 MHz) spectrum of **8** in indicated region.

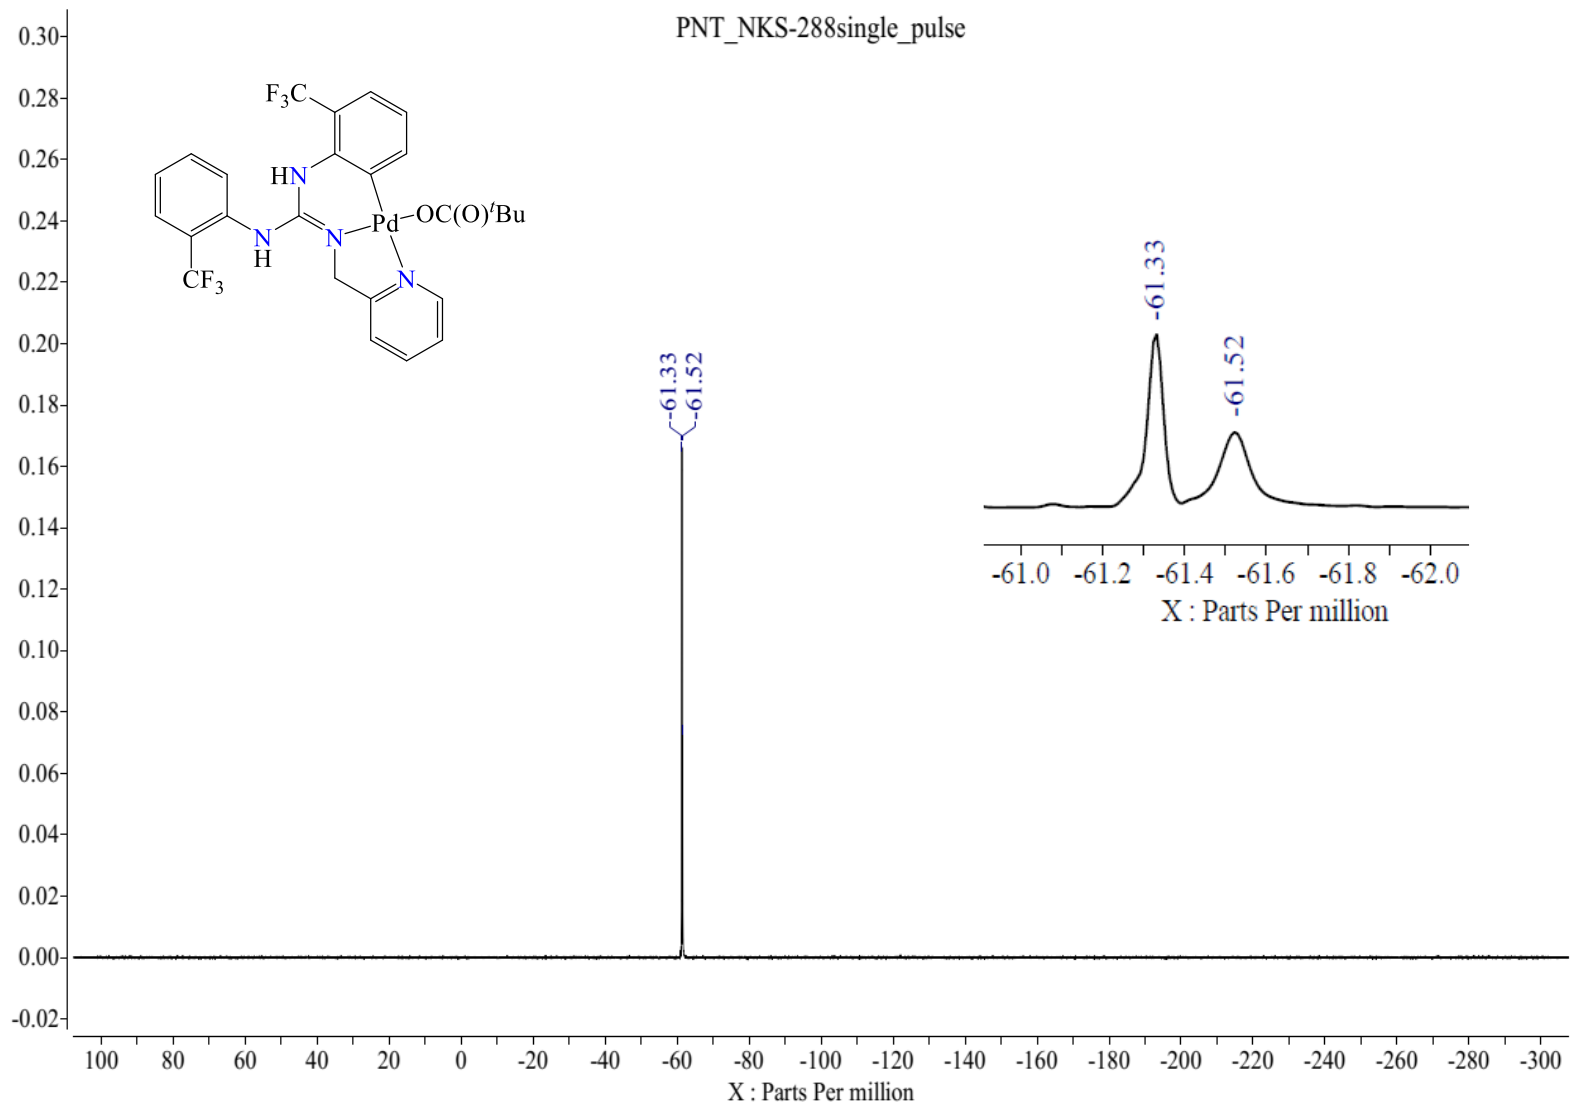

$^{13}\text{F}\{^1\text{H}\}$  NMR ( $\text{CDCl}_3$ , 376.5 MHz) spectrum of **8**.

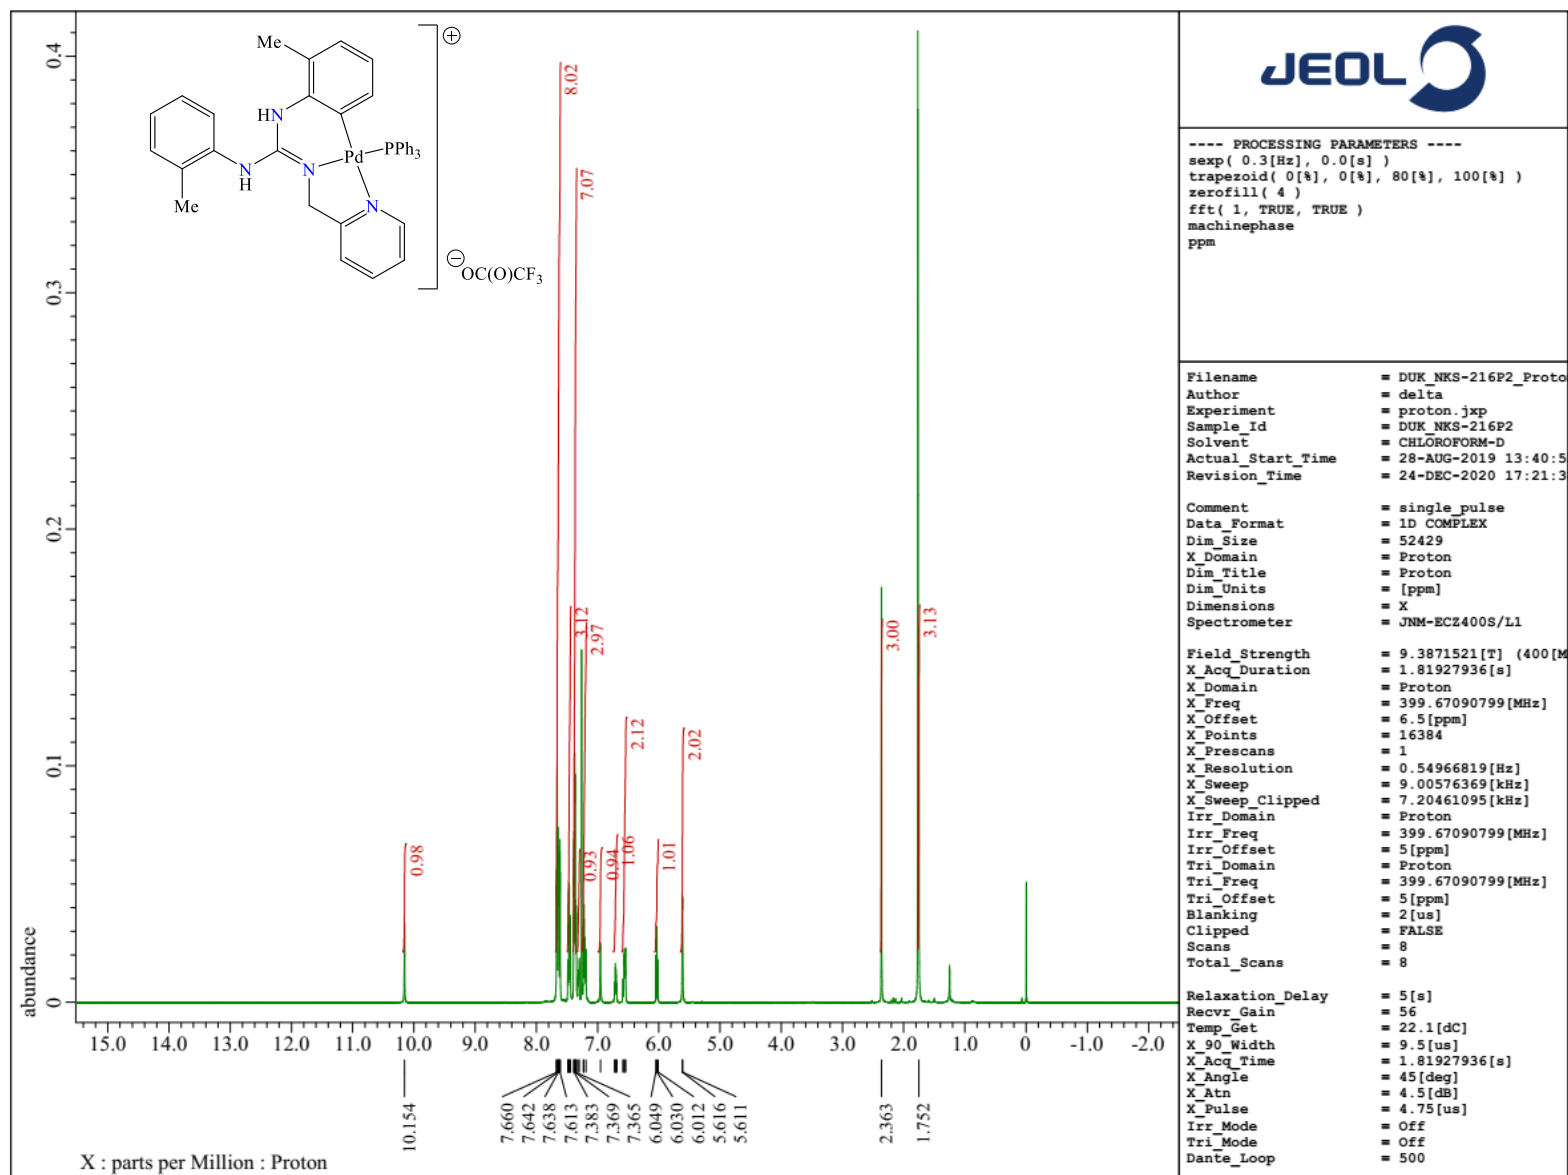

<sup>1</sup>H NMR (CDCl<sub>3</sub>, 400 MHz) spectrum of **10**.

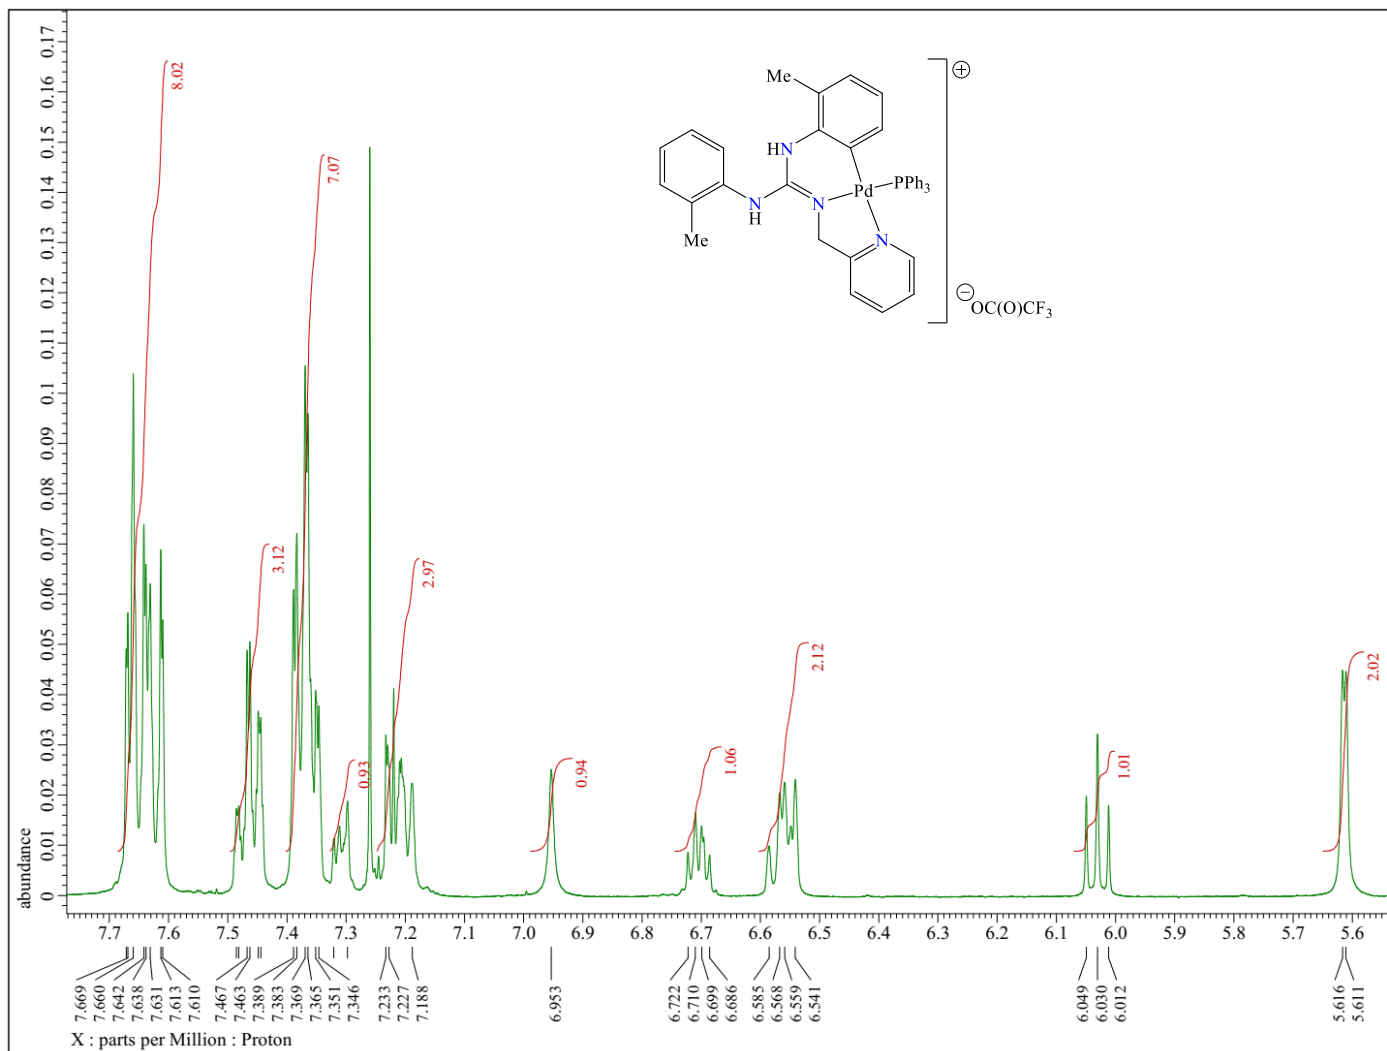

$^1\text{H}$  NMR (CDCl<sub>3</sub>, 400 MHz) spectrum of **10** in indicated region.

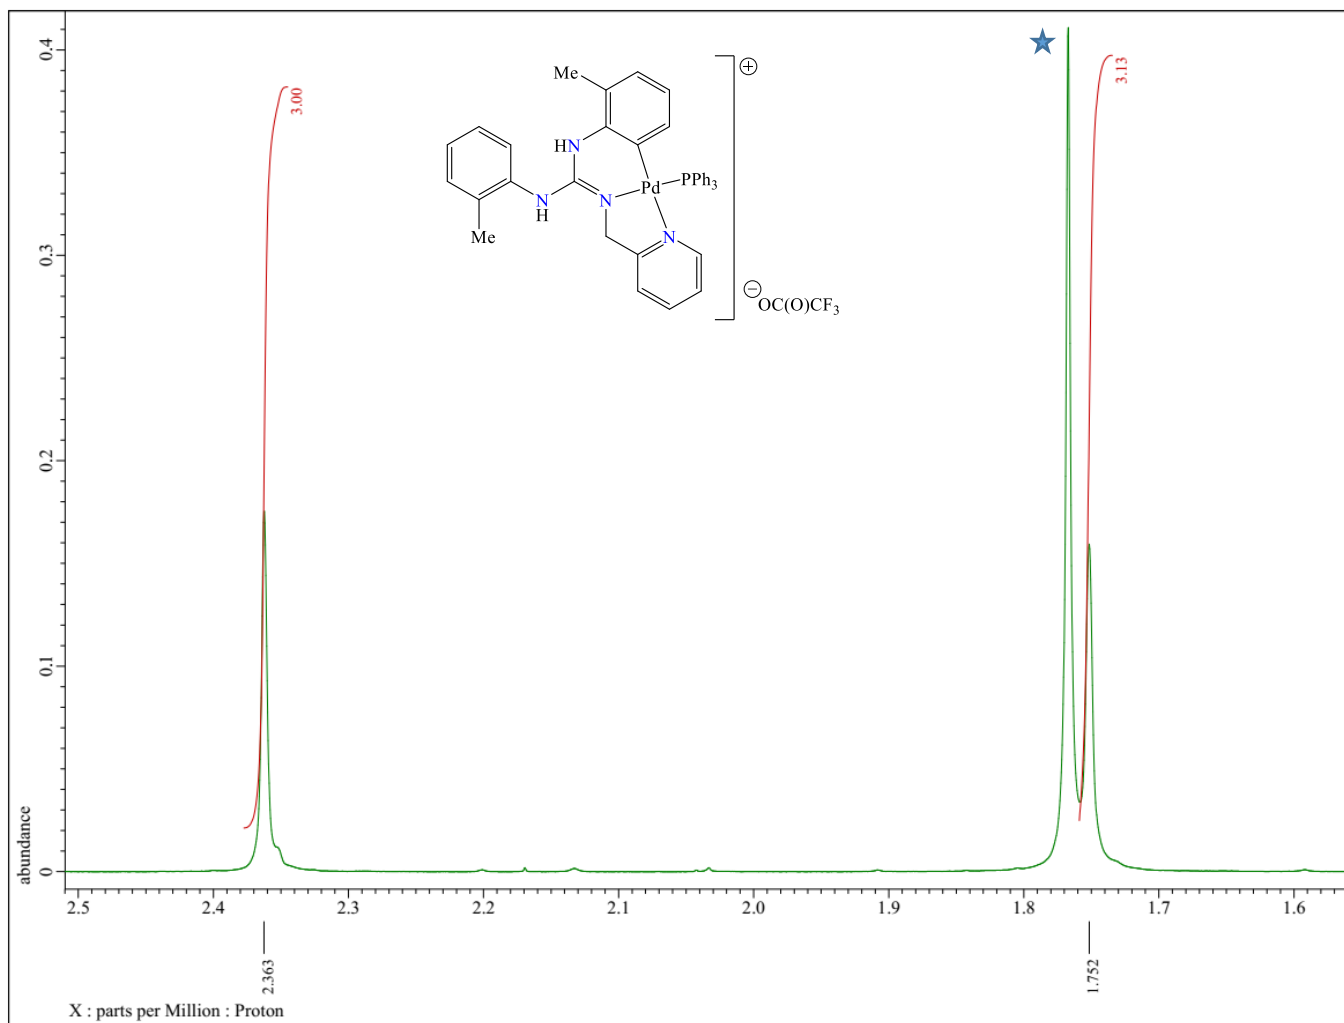

$^1\text{H}$  NMR ( $\text{CDCl}_3$ , 400 MHz) spectrum of **10** in indicated region. The  $\star$  symbol indicates protons of residual water.

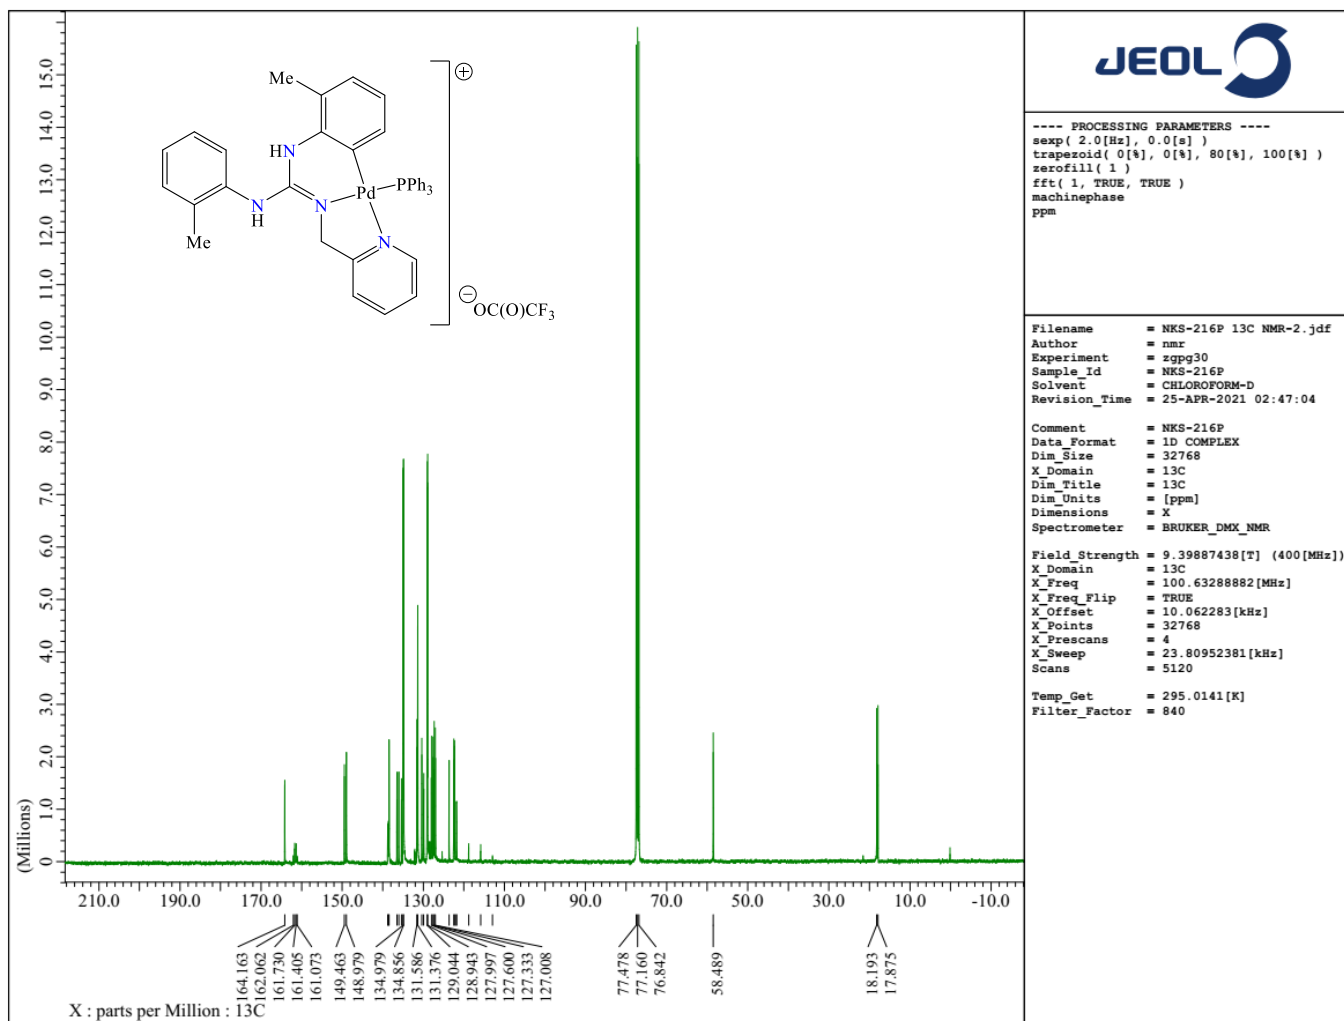

$^{13}\text{C}\{^1\text{H}\}$  NMR ( $\text{CDCl}_3$ , 100.5 MHz) spectrum of **10**.

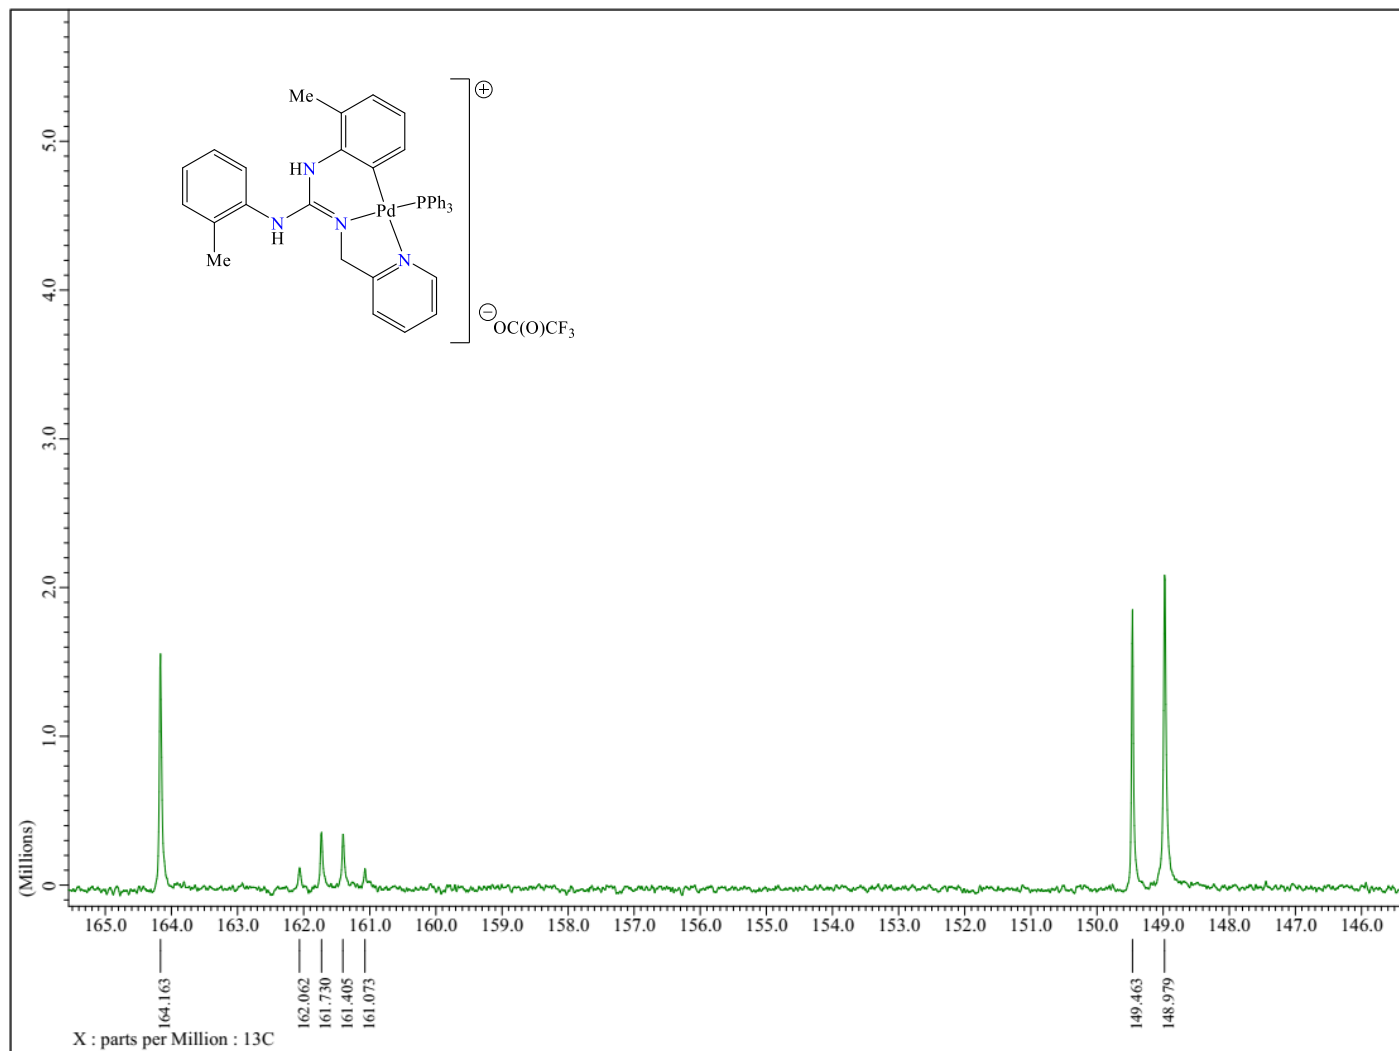

$^{13}\text{C}\{^1\text{H}\}$  NMR ( $\text{CDCl}_3$ , 100.5 MHz) spectrum of **10** in indicated region.

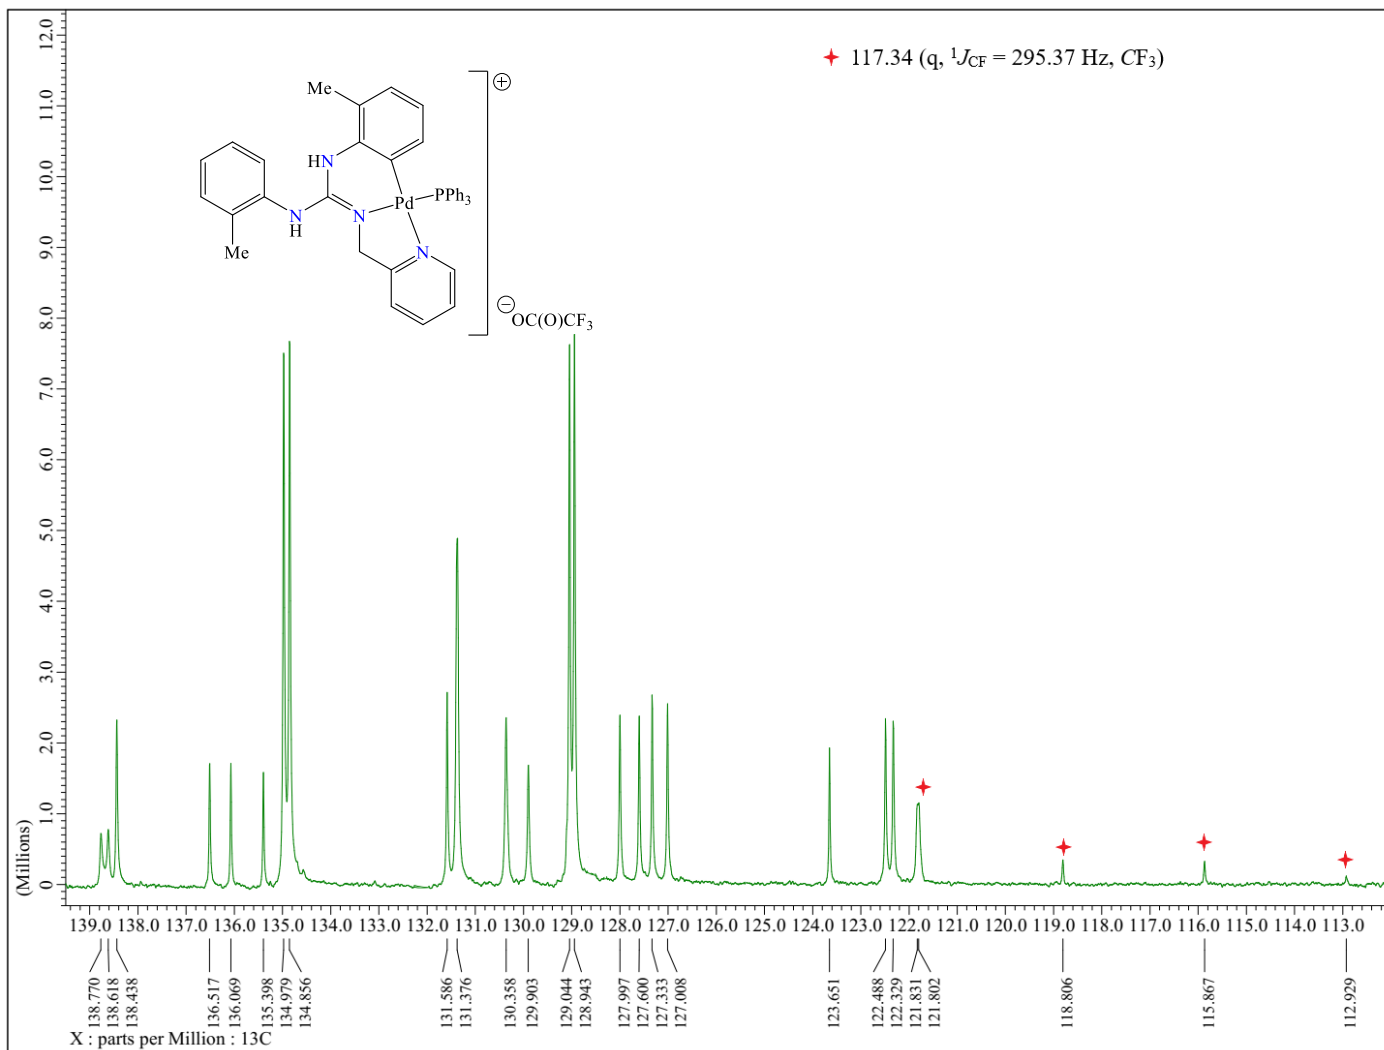

<sup>13</sup>C{<sup>1</sup>H} NMR (CDCl<sub>3</sub>, 100.5 MHz) spectrum of **10** in indicated region.



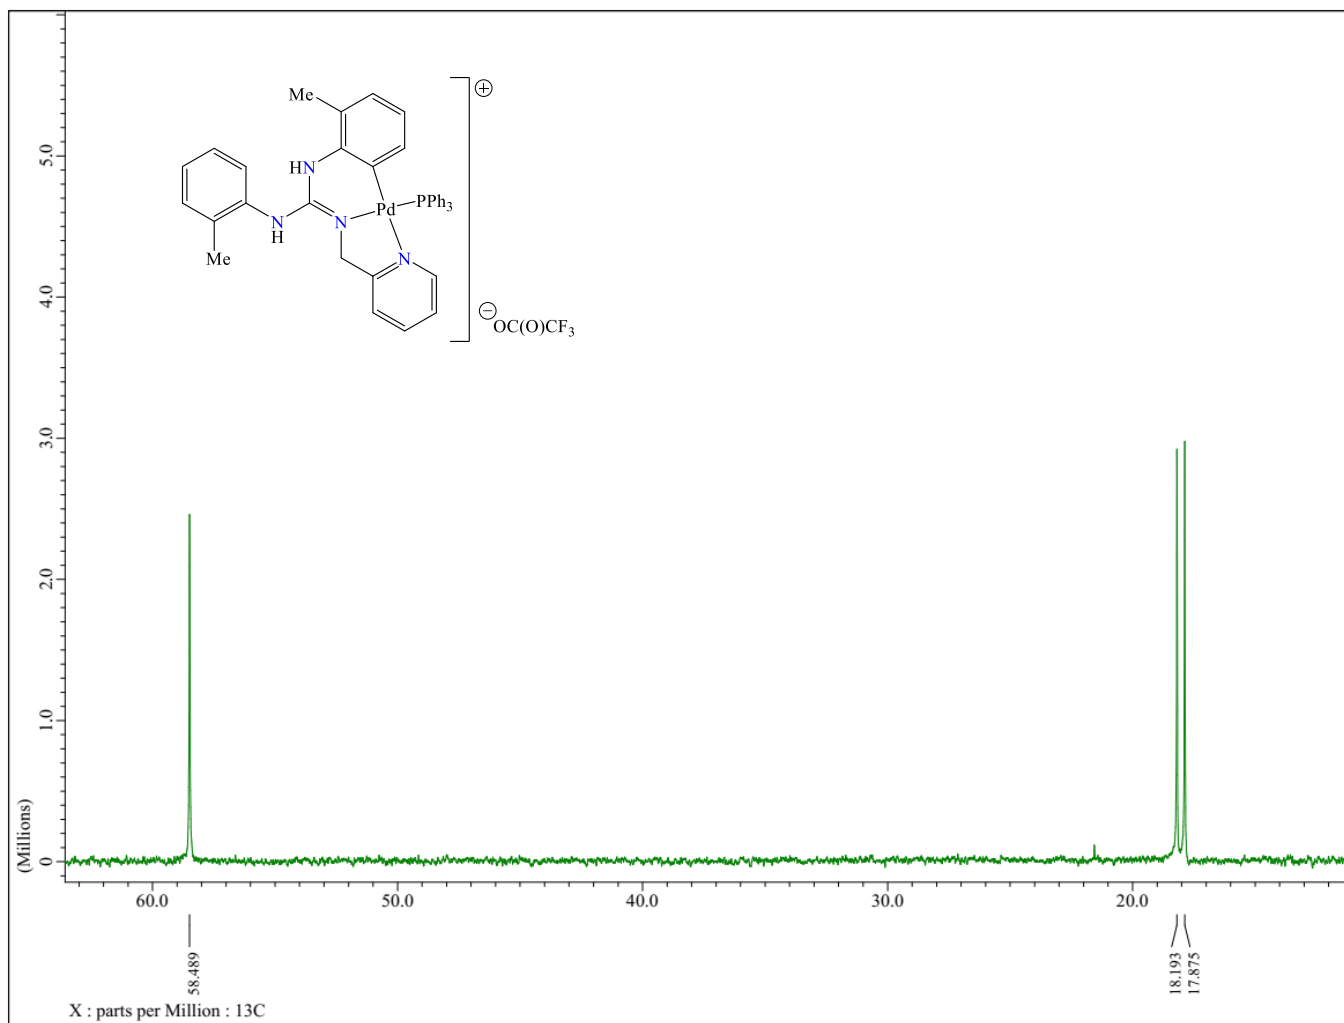

$^{13}\text{C}\{^1\text{H}\}$  NMR ( $\text{CDCl}_3$ , 100.5 MHz) spectrum of **10** in indicated region.

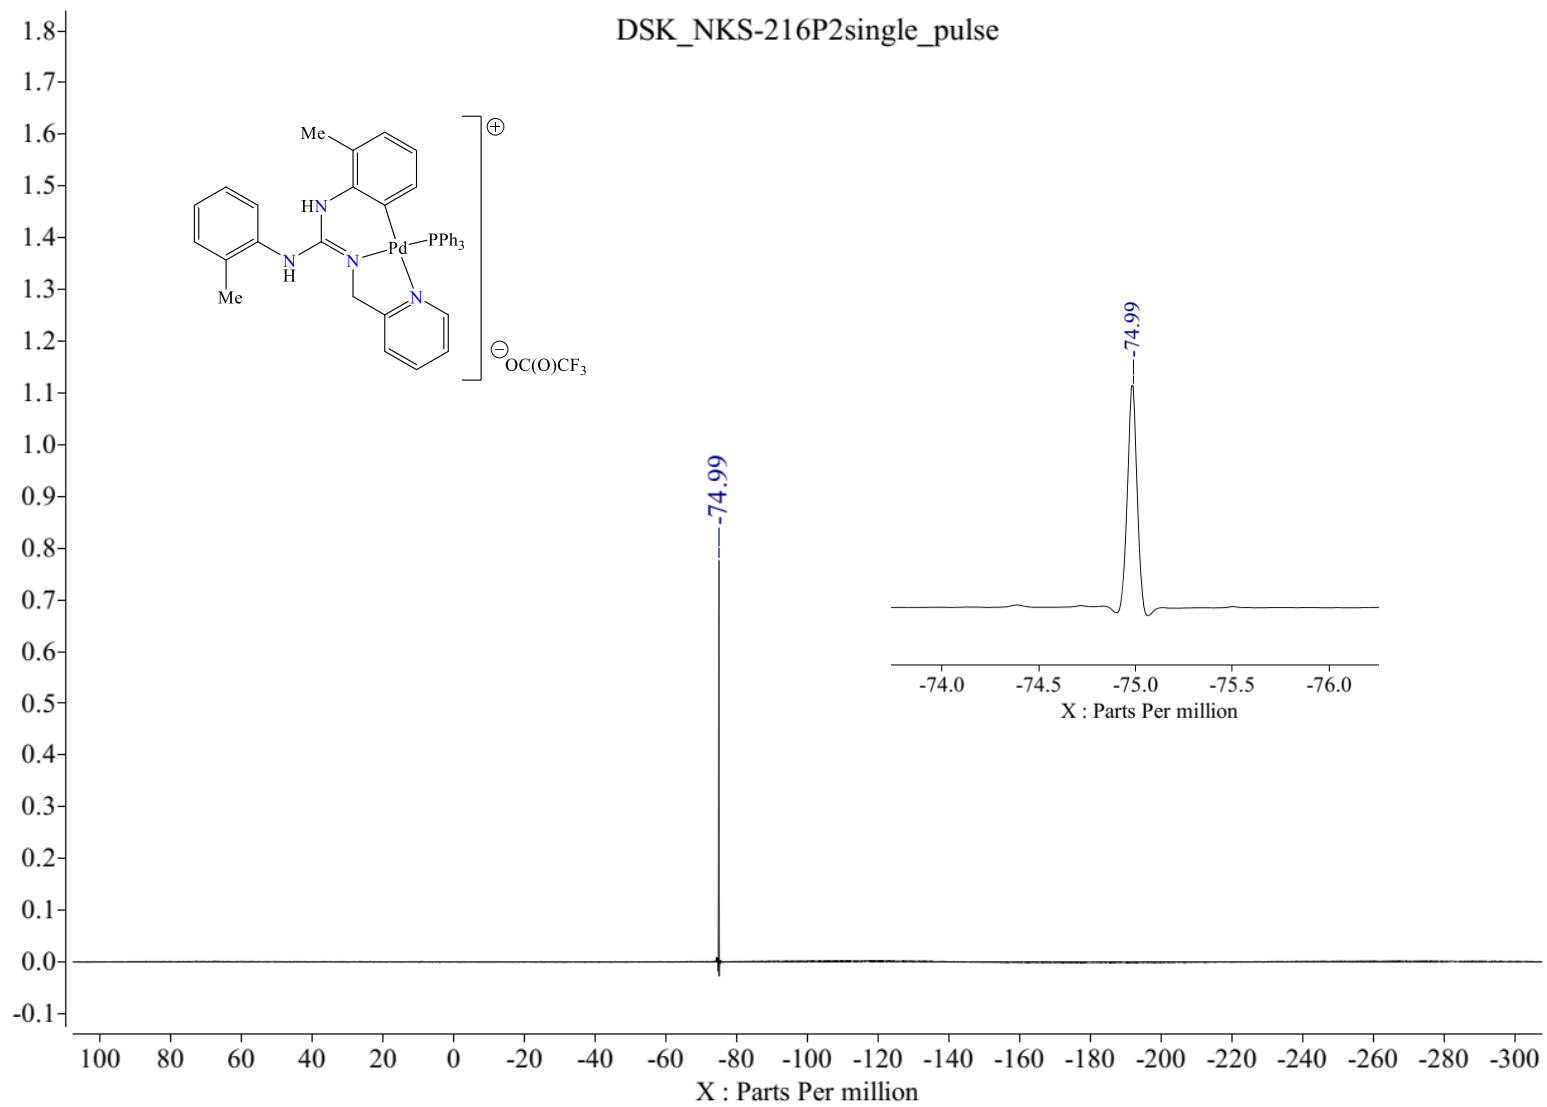

$^{19}\text{F}$  NMR ( $\text{CDCl}_3$ , 376.5 MHz) spectrum of **10**.

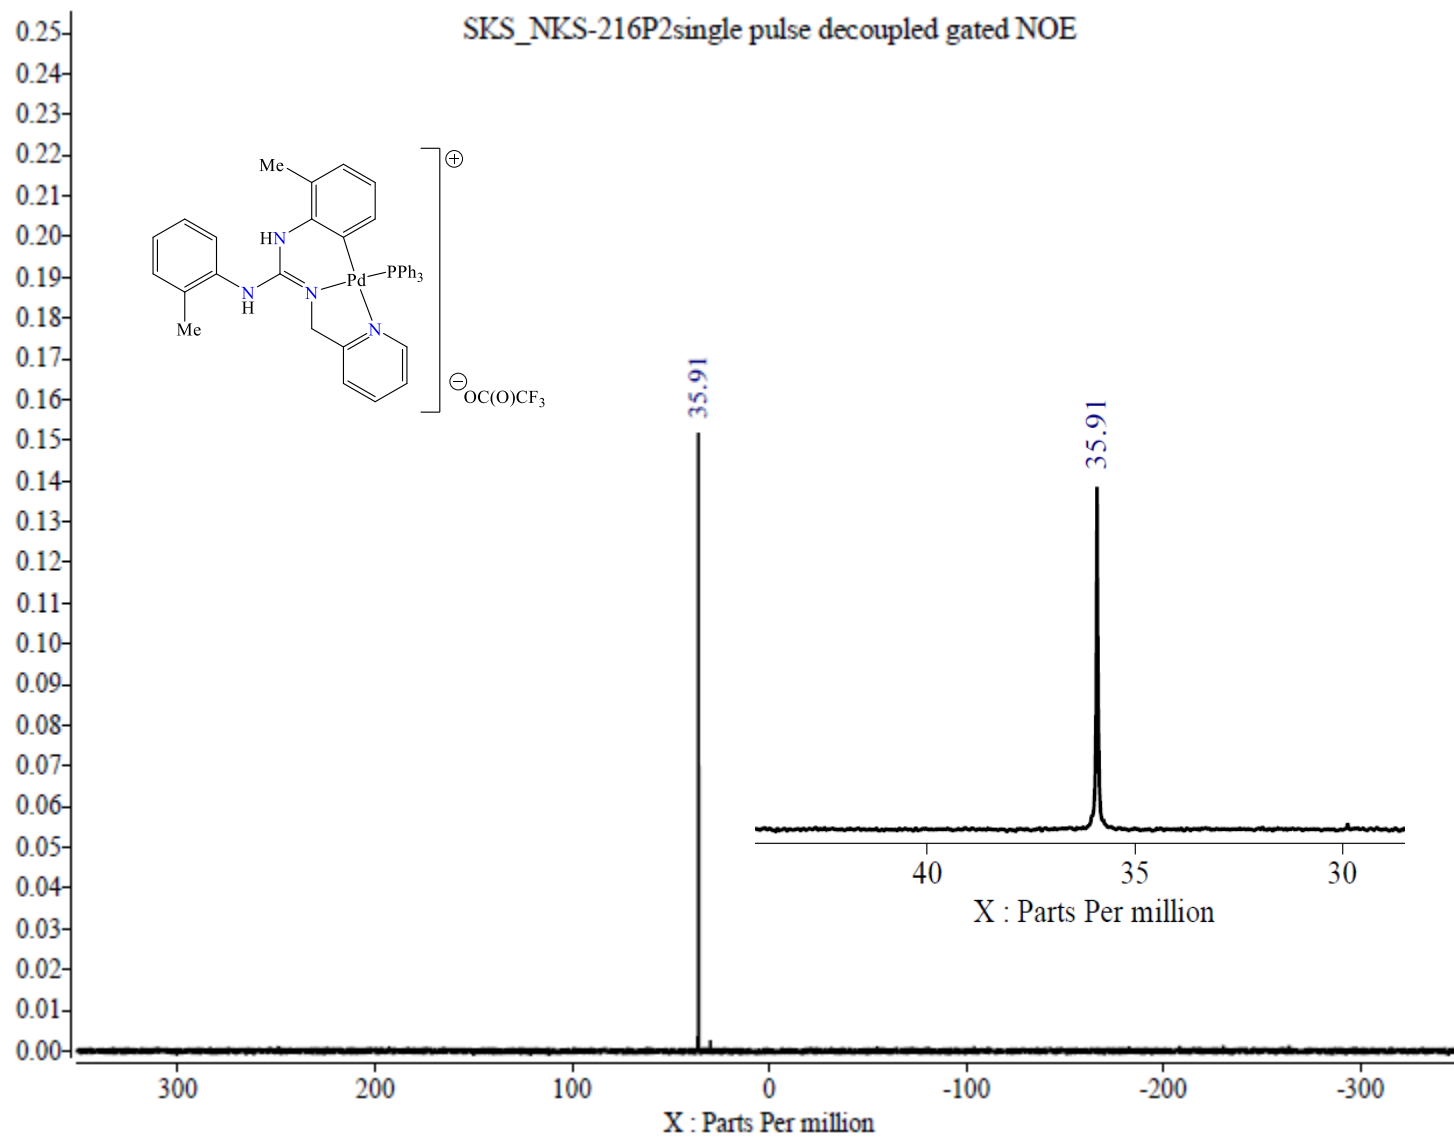

$^{31}\text{P}\{^1\text{H}\}$  NMR ( $\text{CDCl}_3$ , 161.8 MHz) spectrum of **10**.

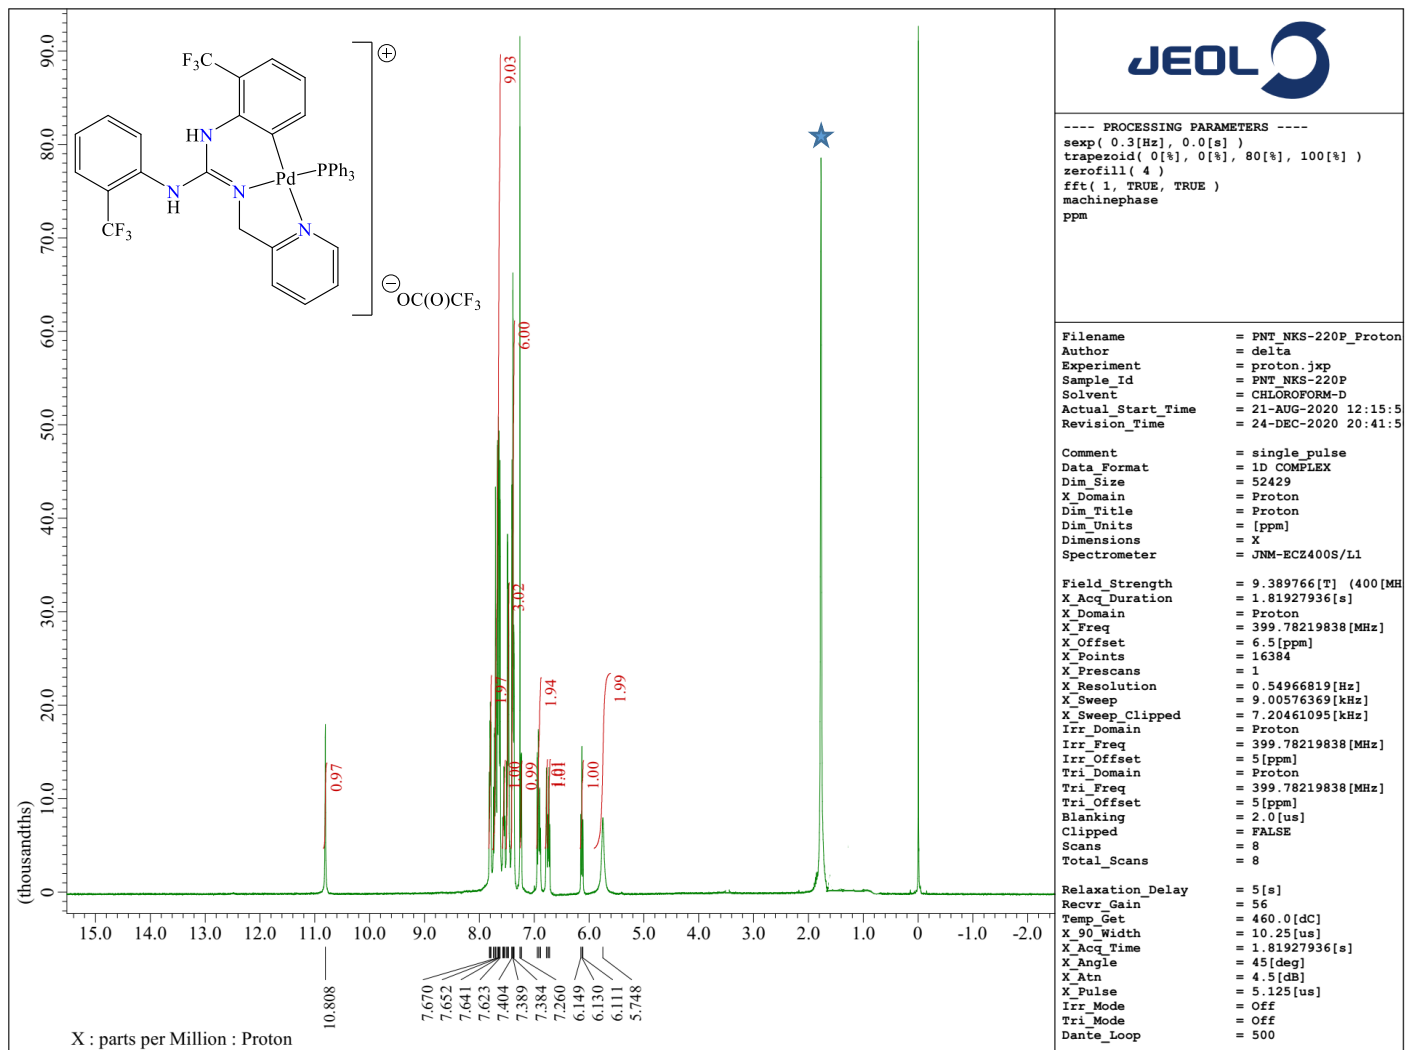

$^1\text{H}$  NMR ( $\text{CDCl}_3$ , 400 MHz) spectrum of **11**. The ★ symbol indicates protons of residual water.

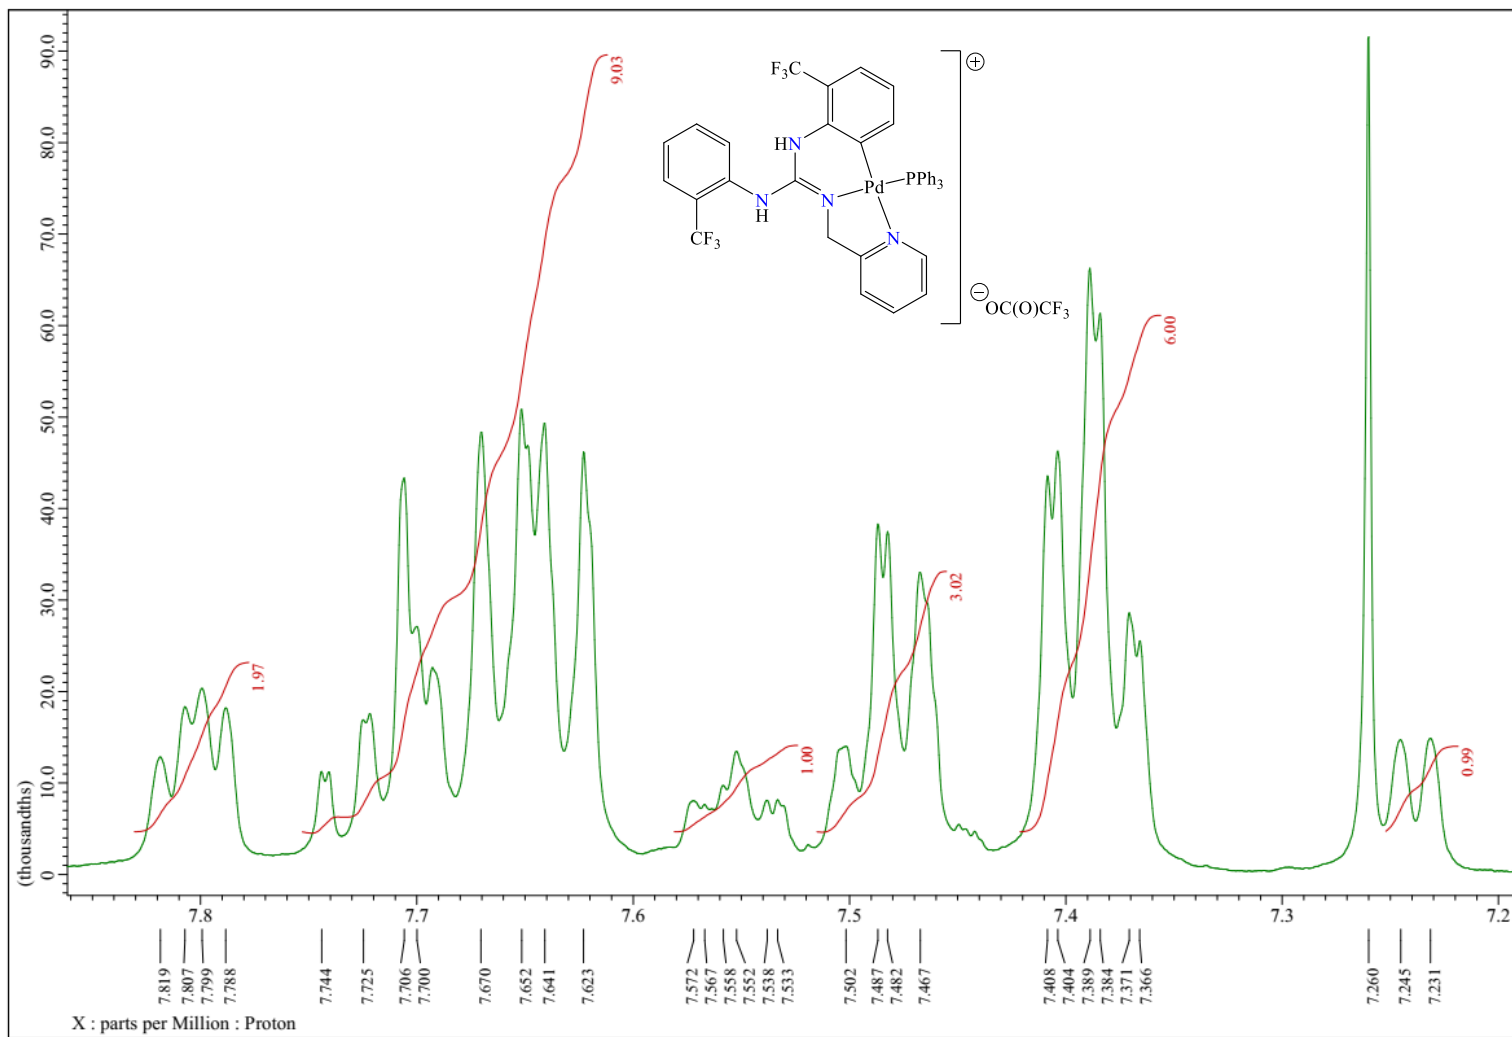

<sup>1</sup>H NMR (CDCl<sub>3</sub>, 400 MHz) spectrum of **11** in indicated region.

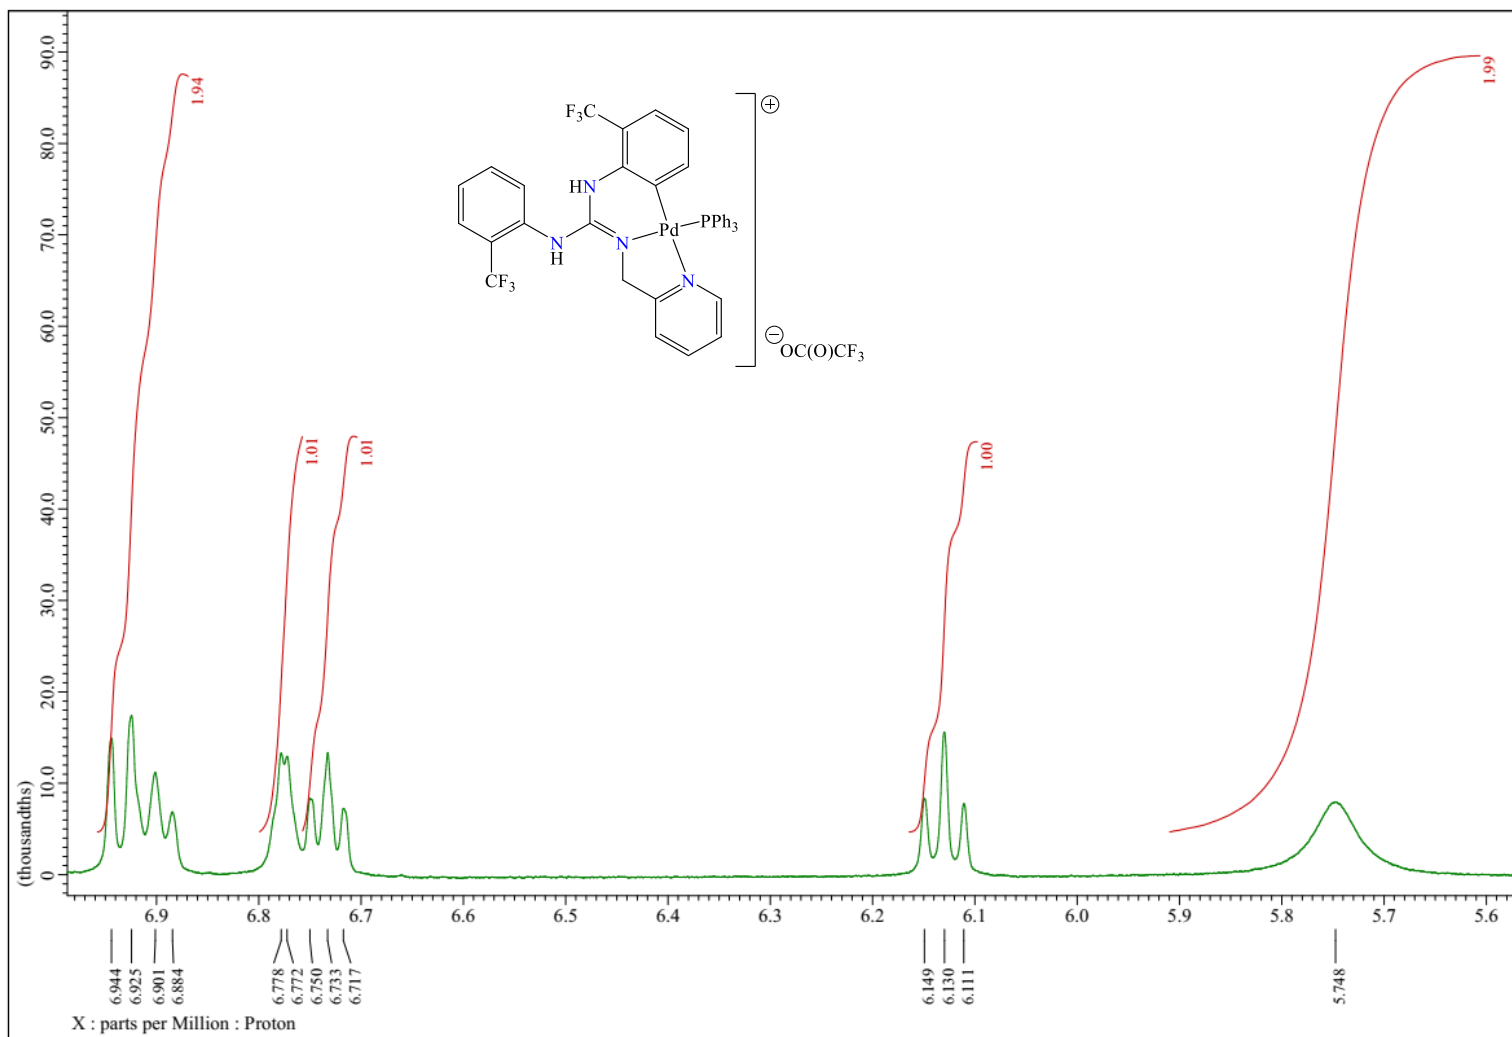

$^1\text{H}$  NMR ( $\text{CDCl}_3$ , 400 MHz) spectrum of **11** in indicated region.

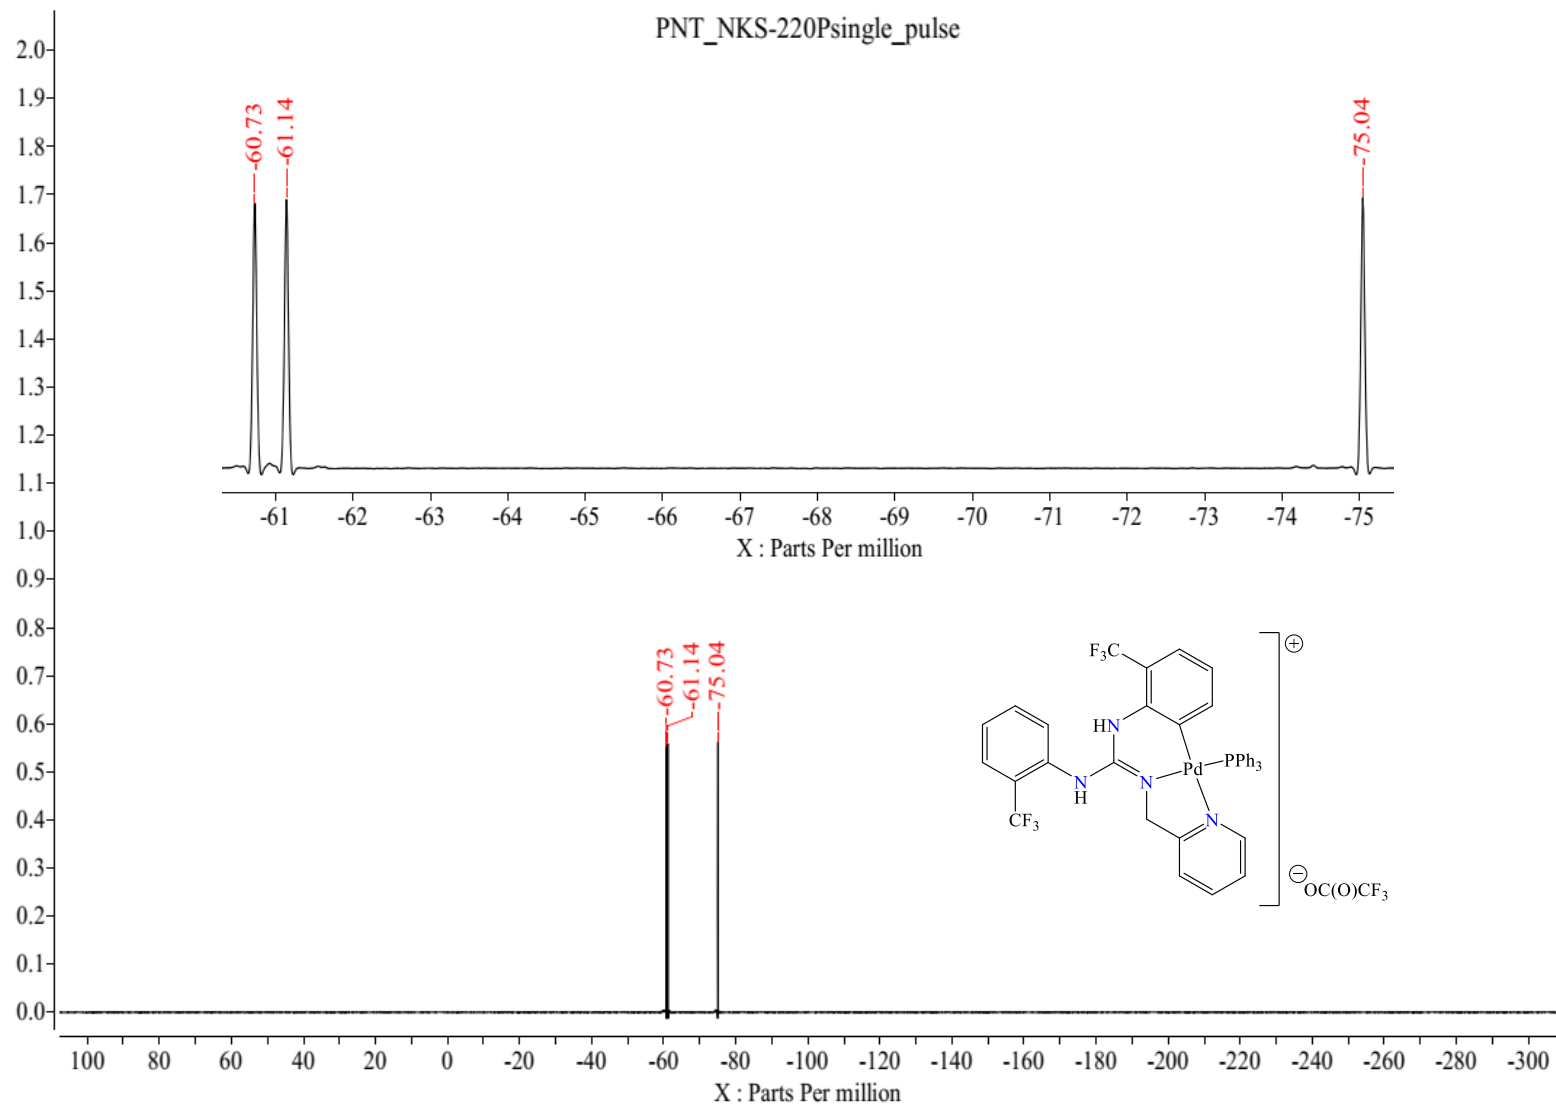

<sup>19</sup>F NMR (CDCl<sub>3</sub>, 376.5 MHz) spectrum of **11**.

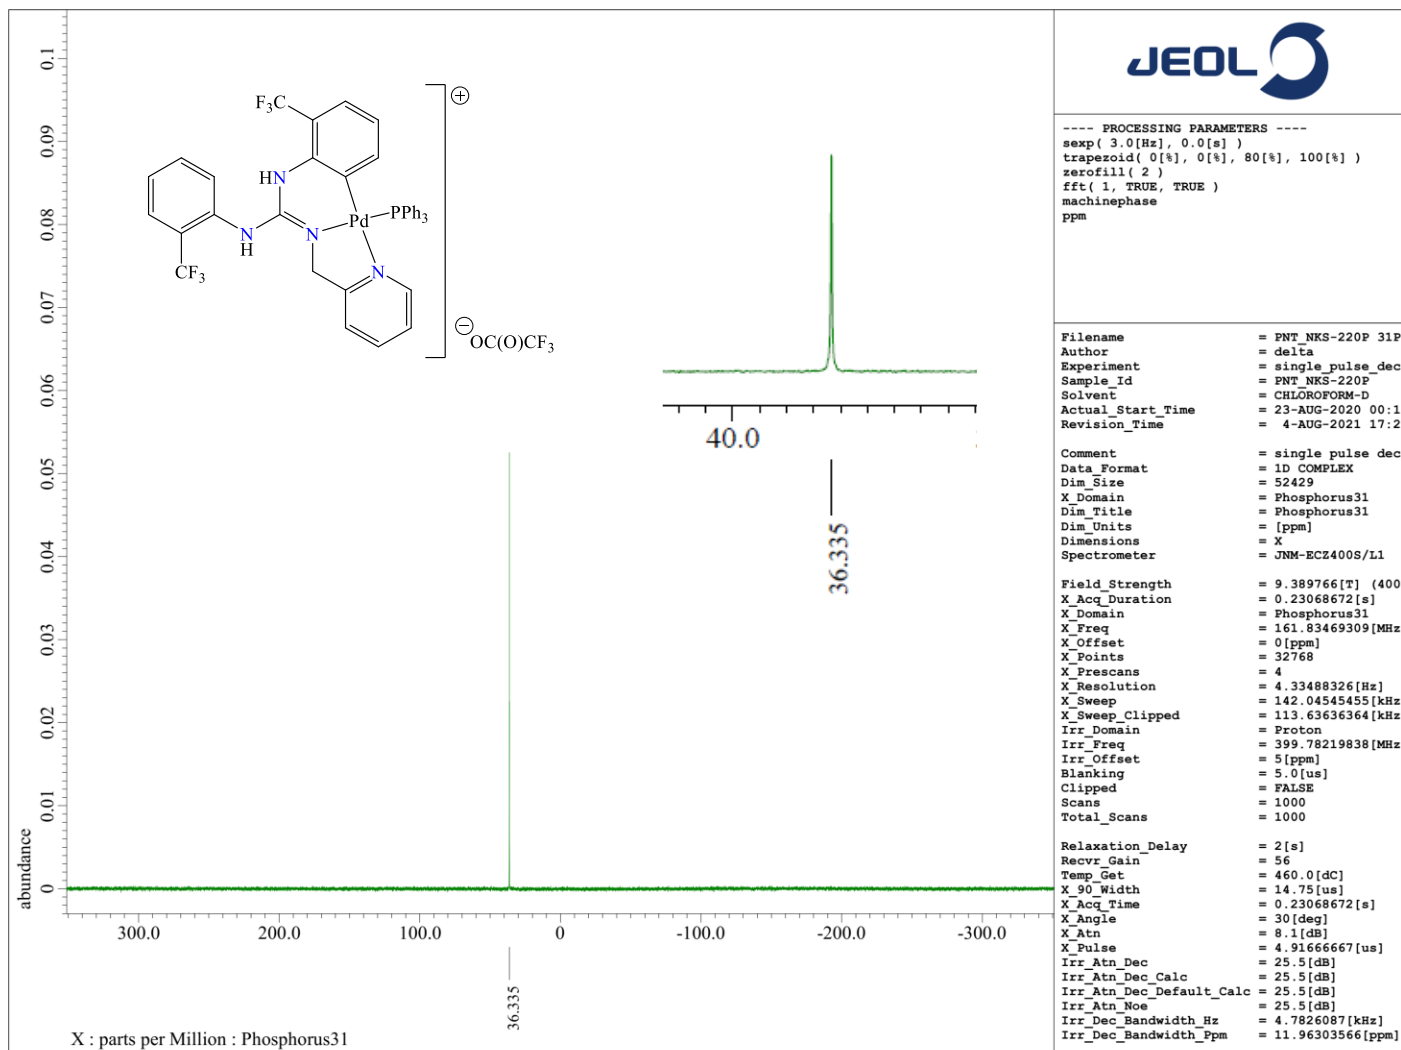

$^{31}\text{P}\{^1\text{H}\}$  NMR ( $\text{CDCl}_3$ , 161.8 MHz) spectrum of **11**.



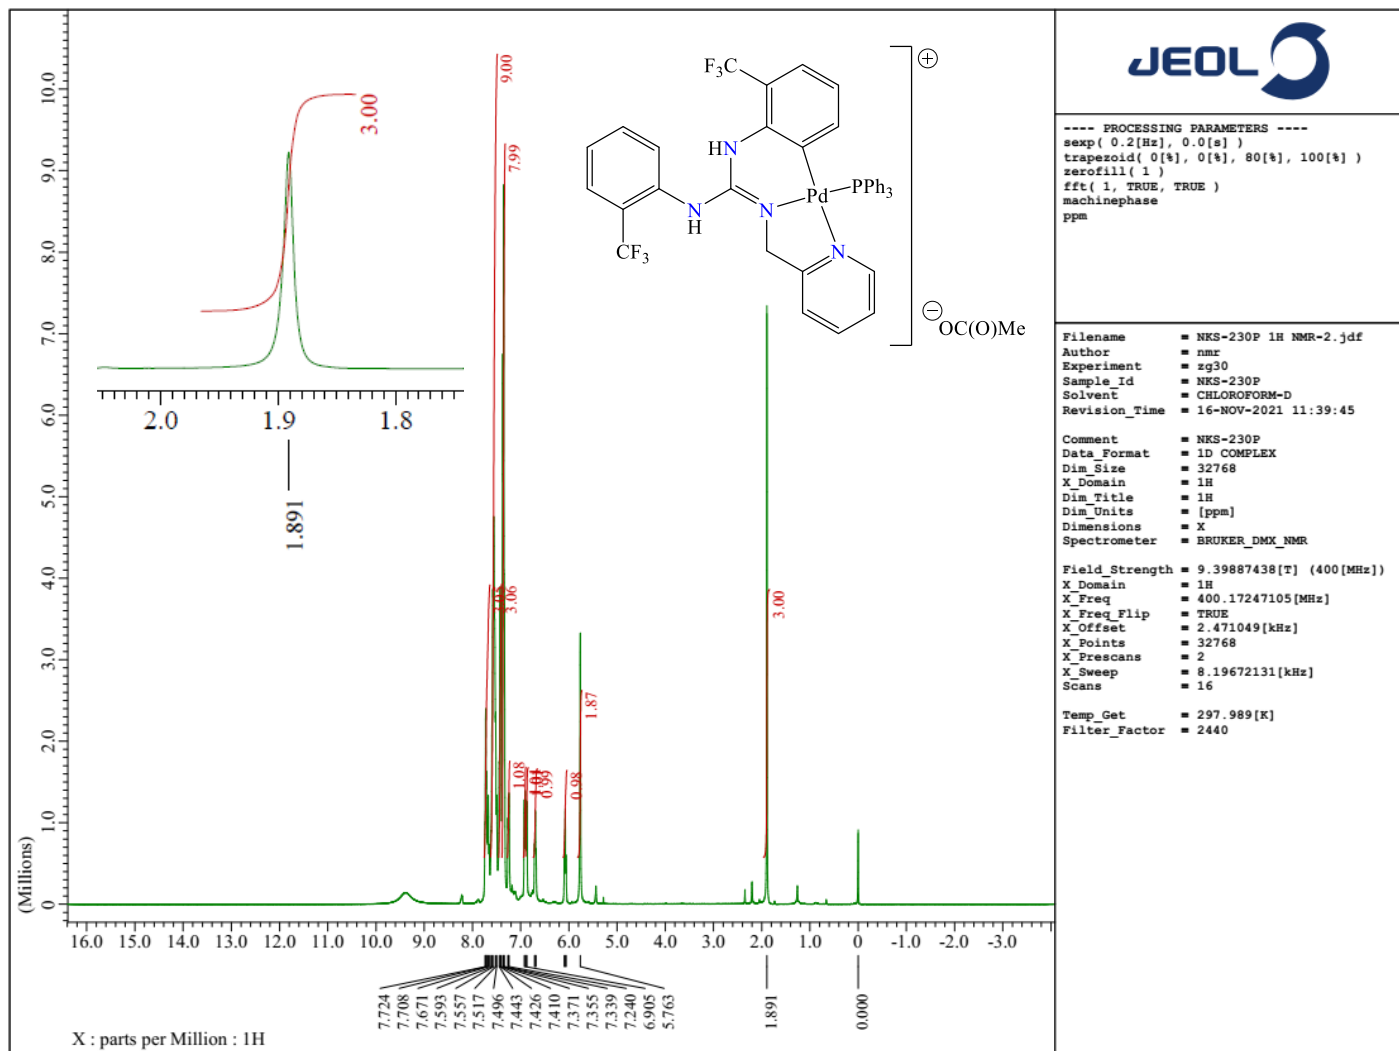

$^1\text{H}$  NMR ( $\text{CDCl}_3$ , 400 MHz) spectrum of **12** in indicated region.

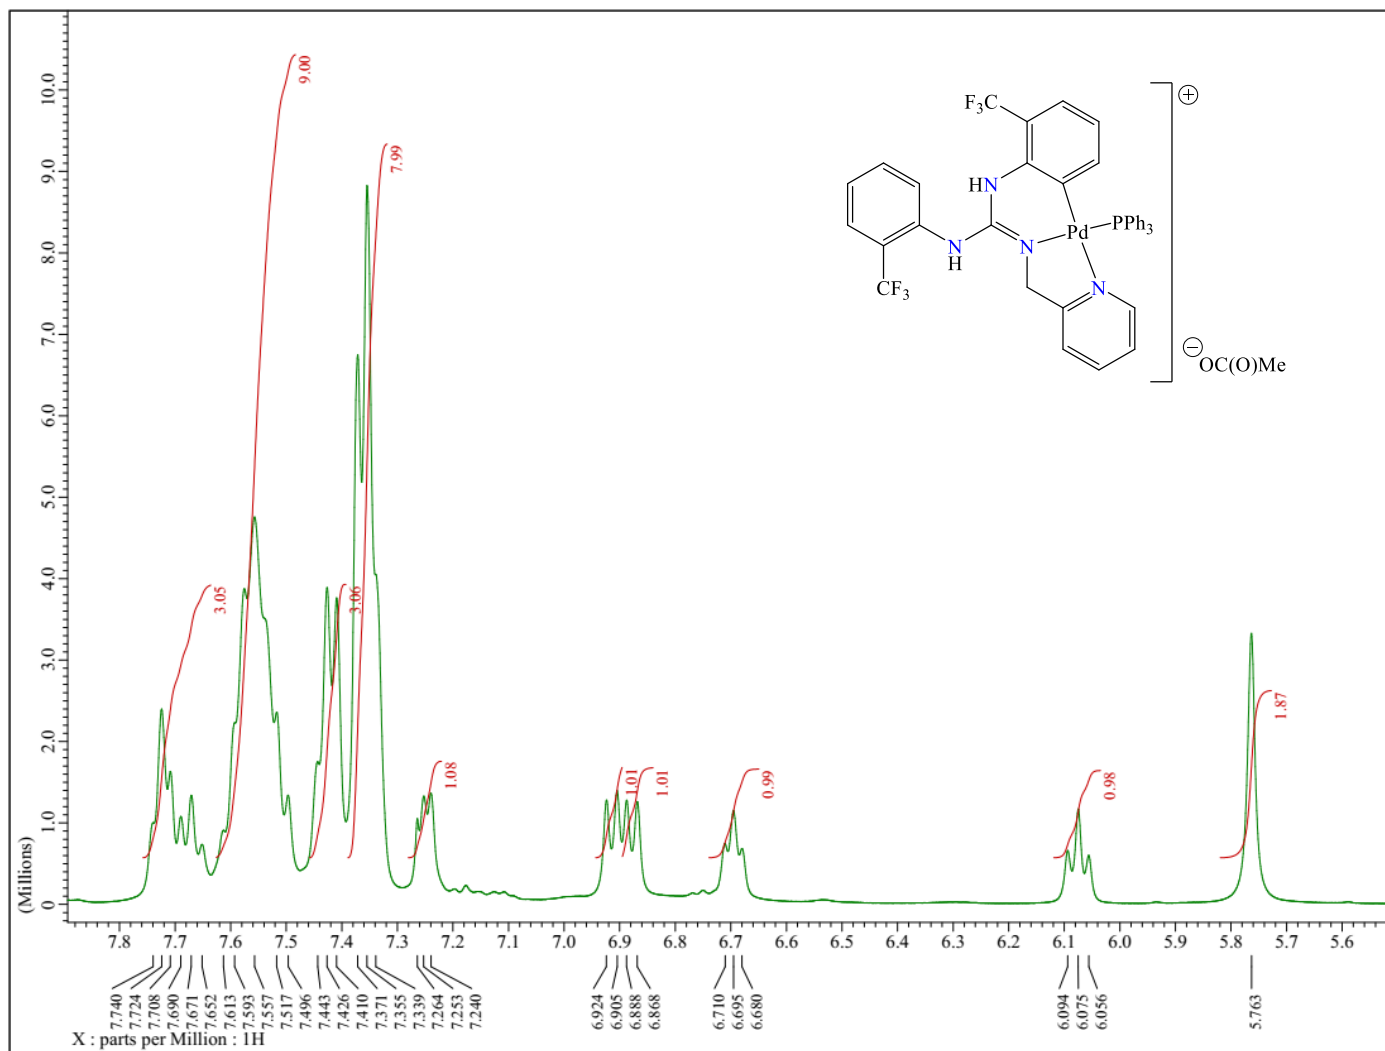

<sup>1</sup>H NMR (CDCl<sub>3</sub>, 400 MHz) spectrum of **12** in indicated region.

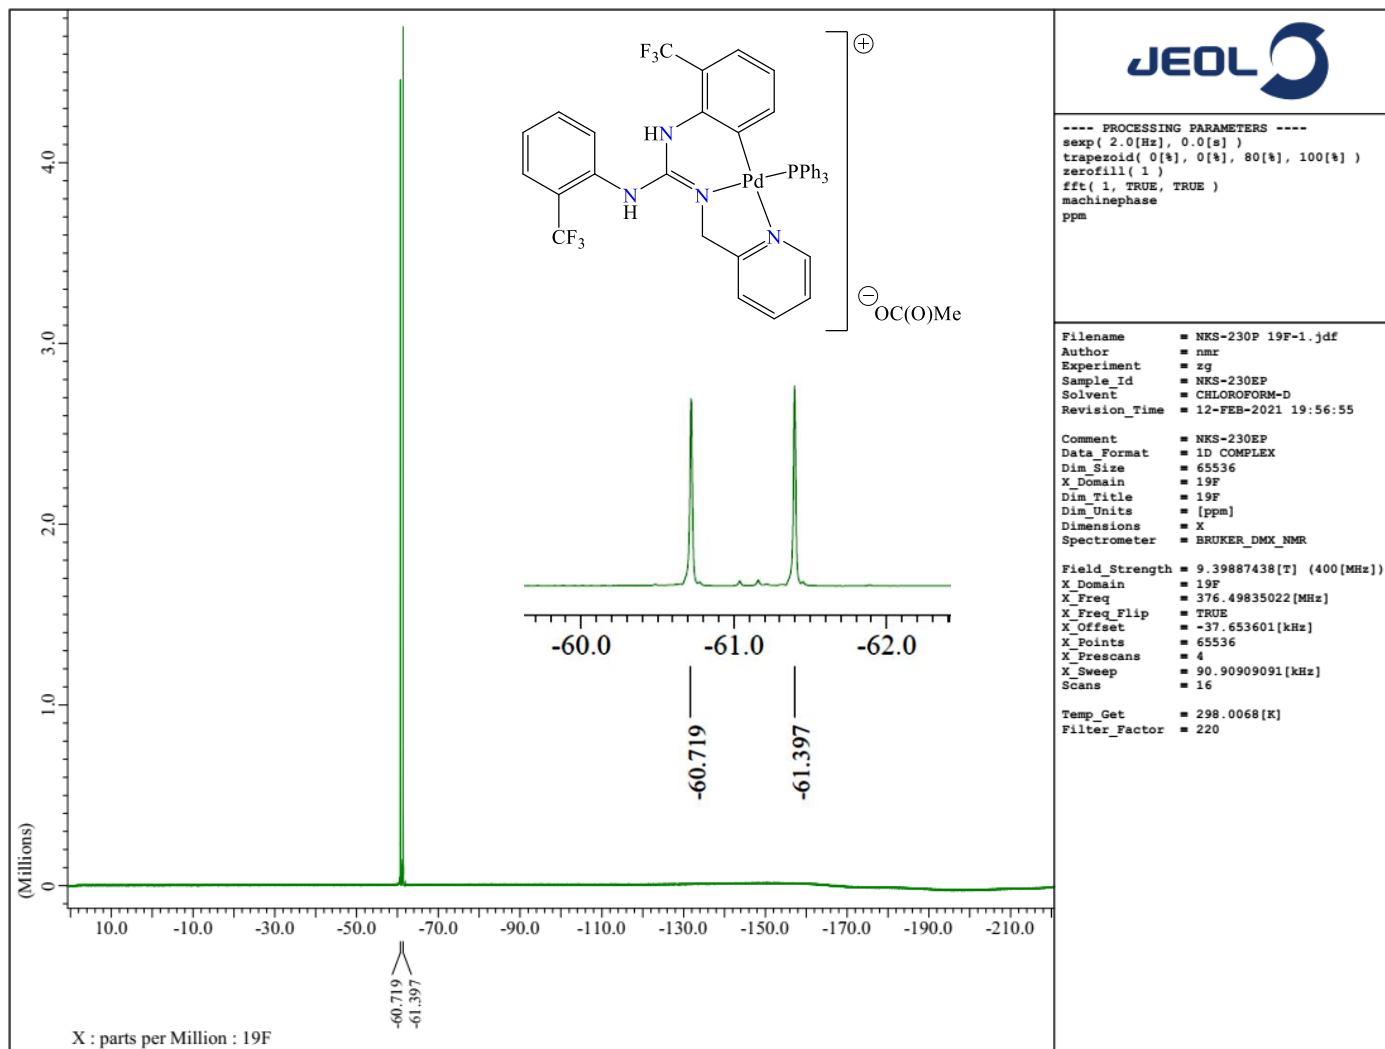

$^{19}\text{F}$  NMR ( $\text{CDCl}_3$ , 376.5 MHz) spectrum of **12** in indicated region.

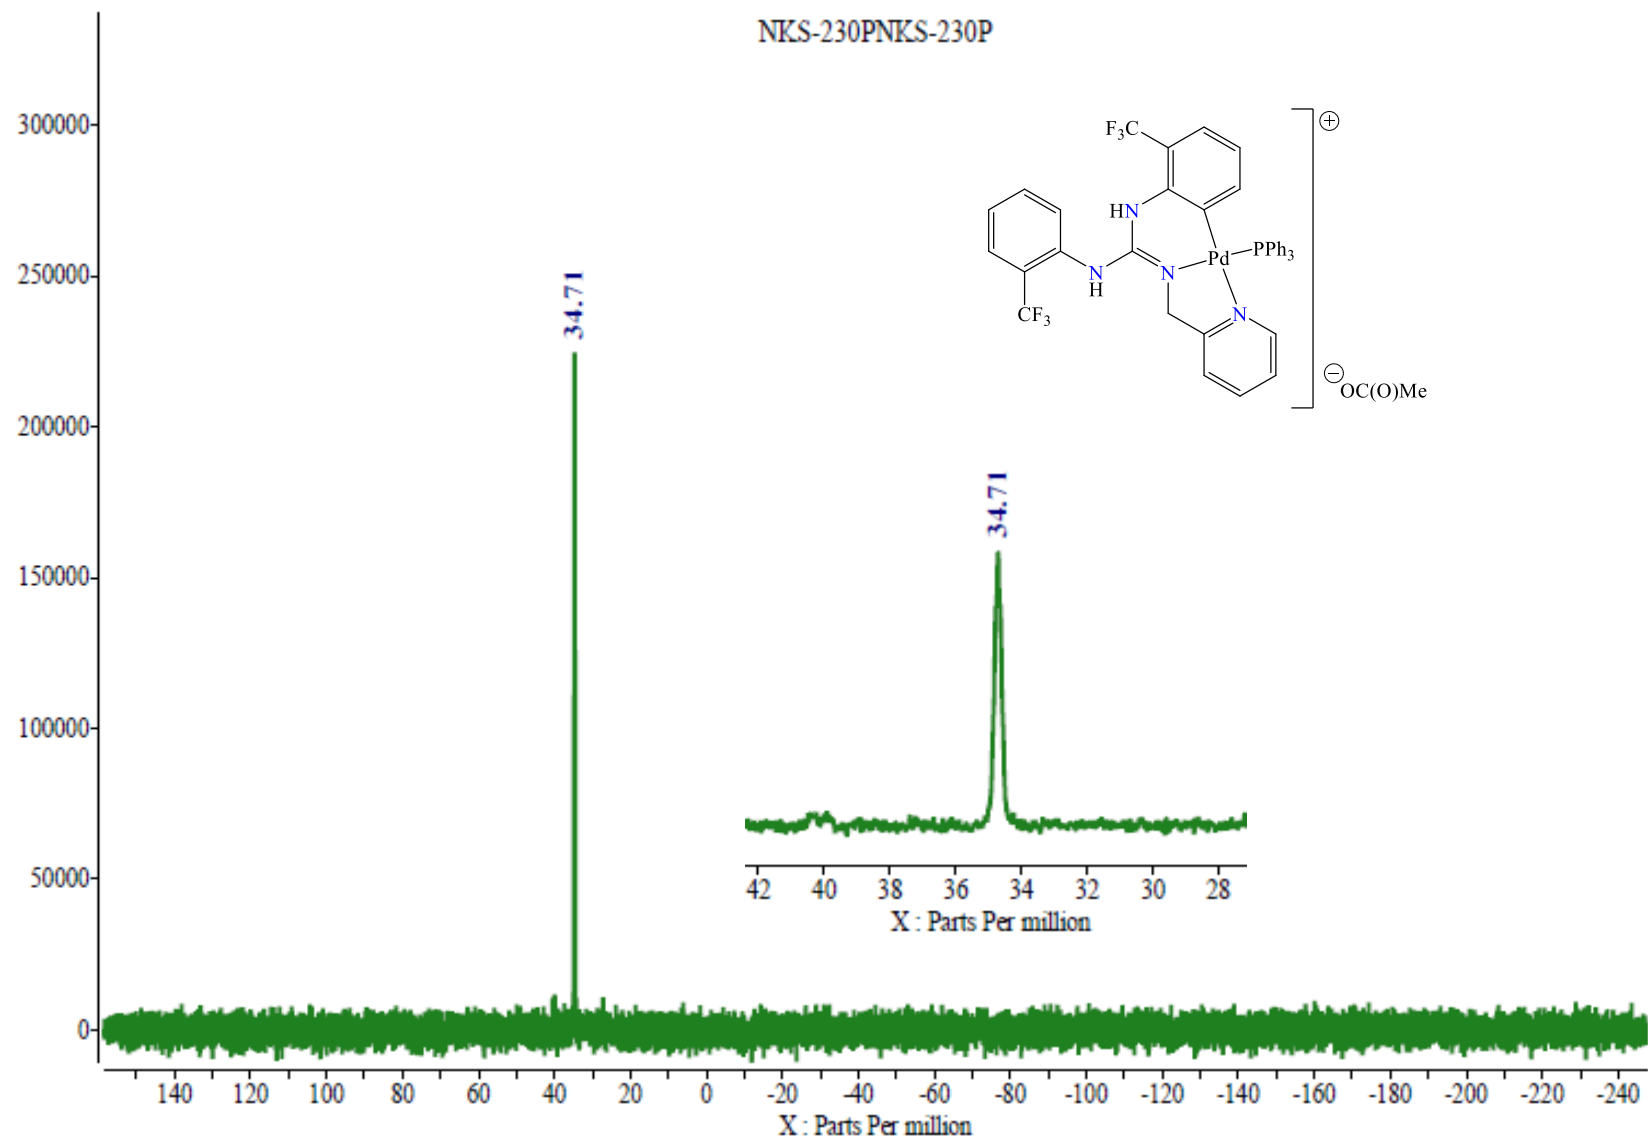

$^{31}\text{P}\{^1\text{H}\}$  NMR ( $\text{CDCl}_3$ , 161.8 MHz) spectrum of **12**.

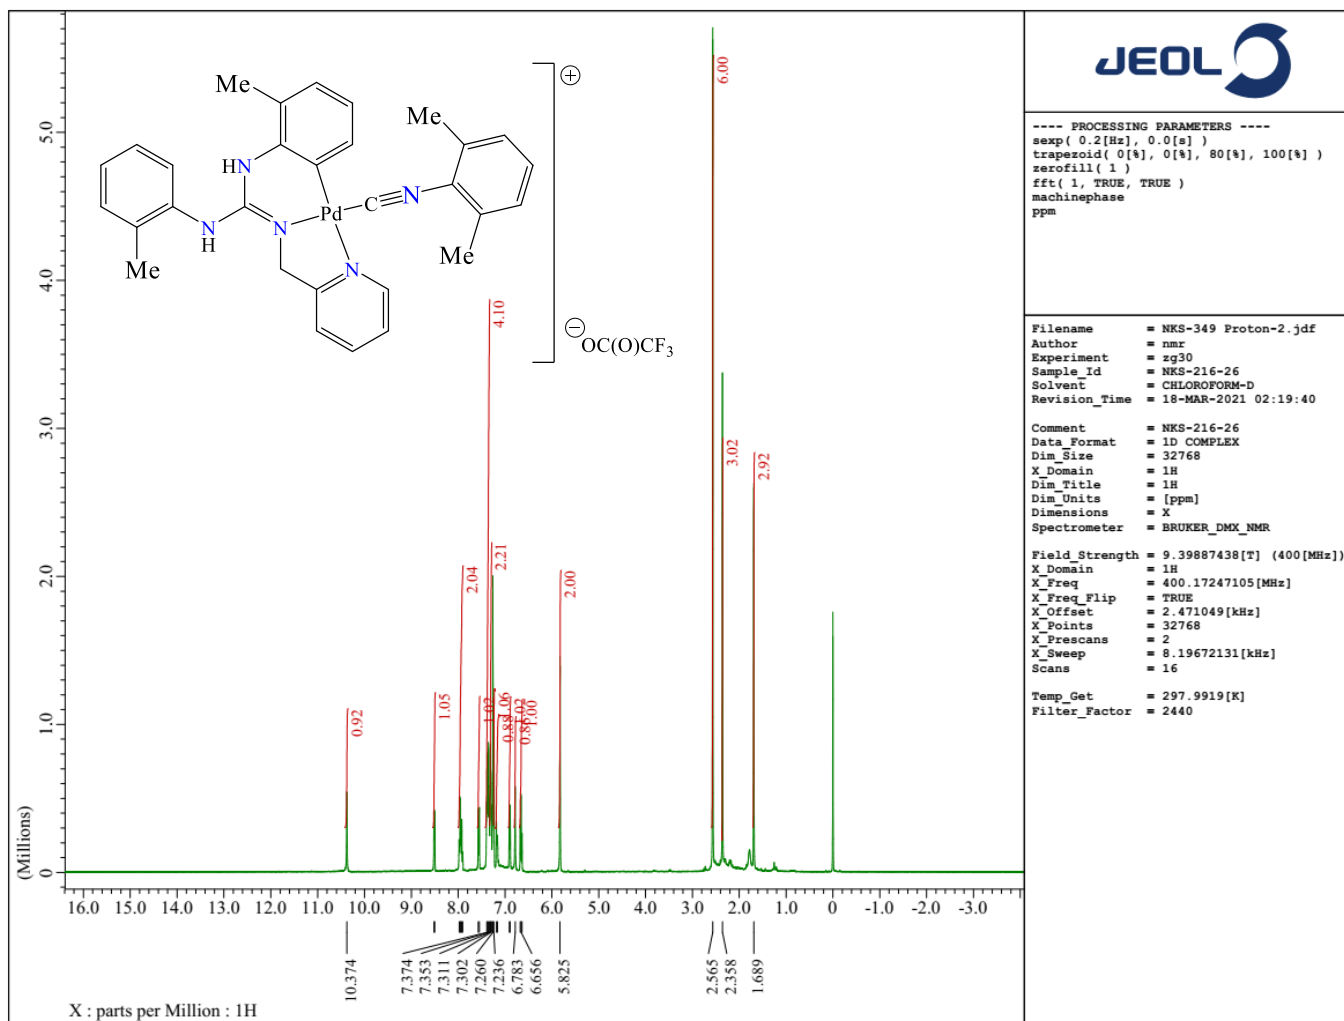

$^1\text{H}$  NMR (CDCl<sub>3</sub>, 400 MHz) spectrum of **13**.

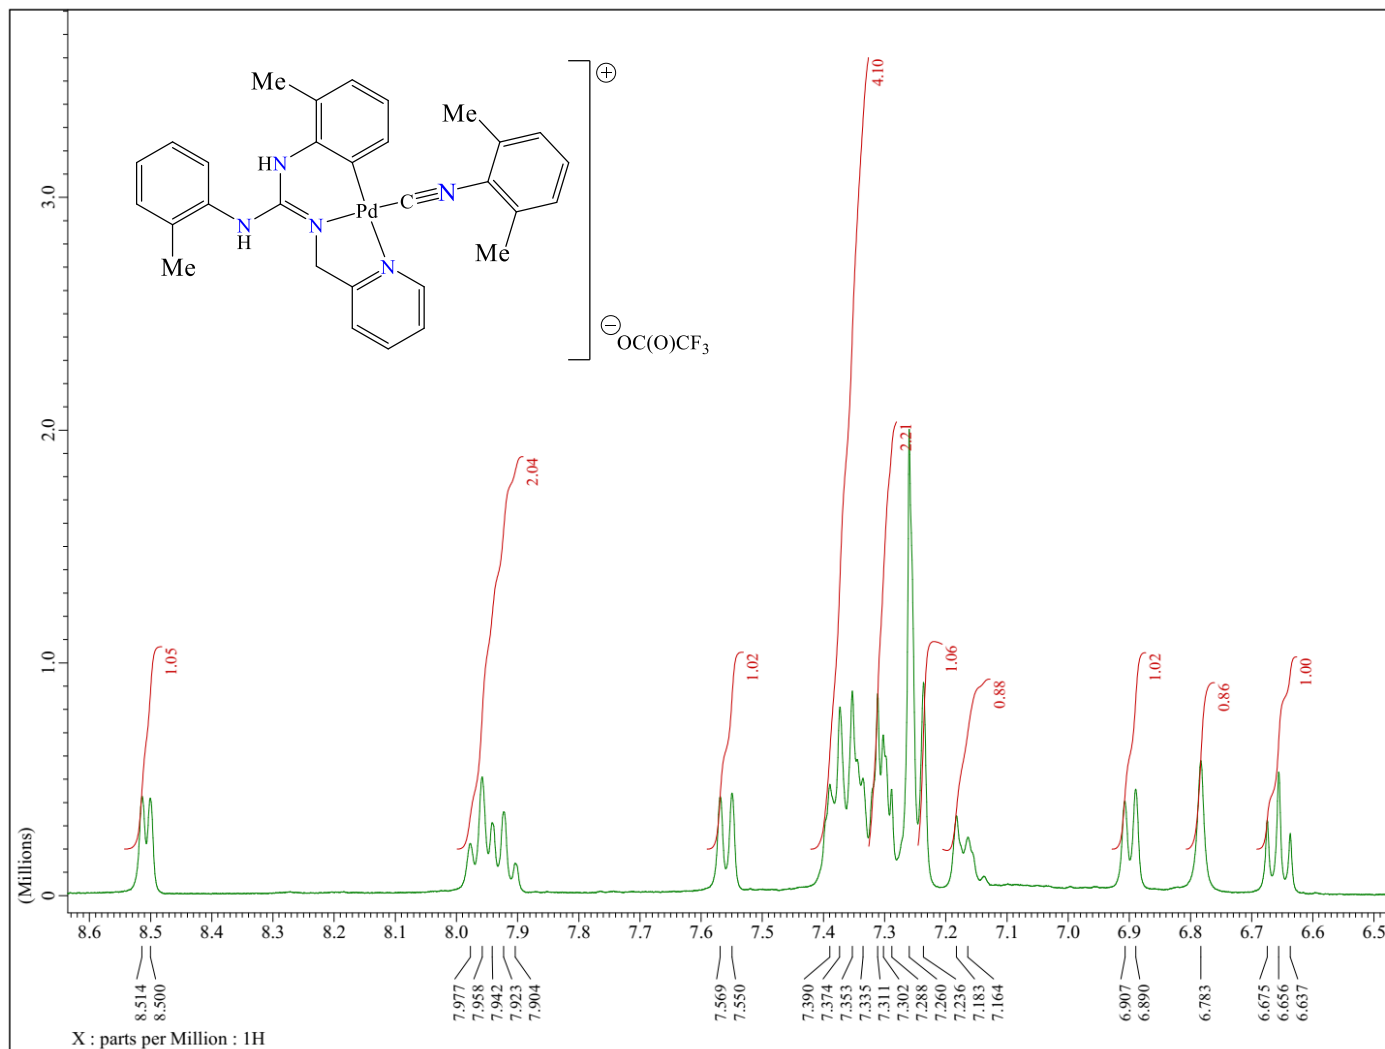

$^1\text{H}$  NMR (CDCl<sub>3</sub>, 400 MHz) spectrum of **13** in indicated region.

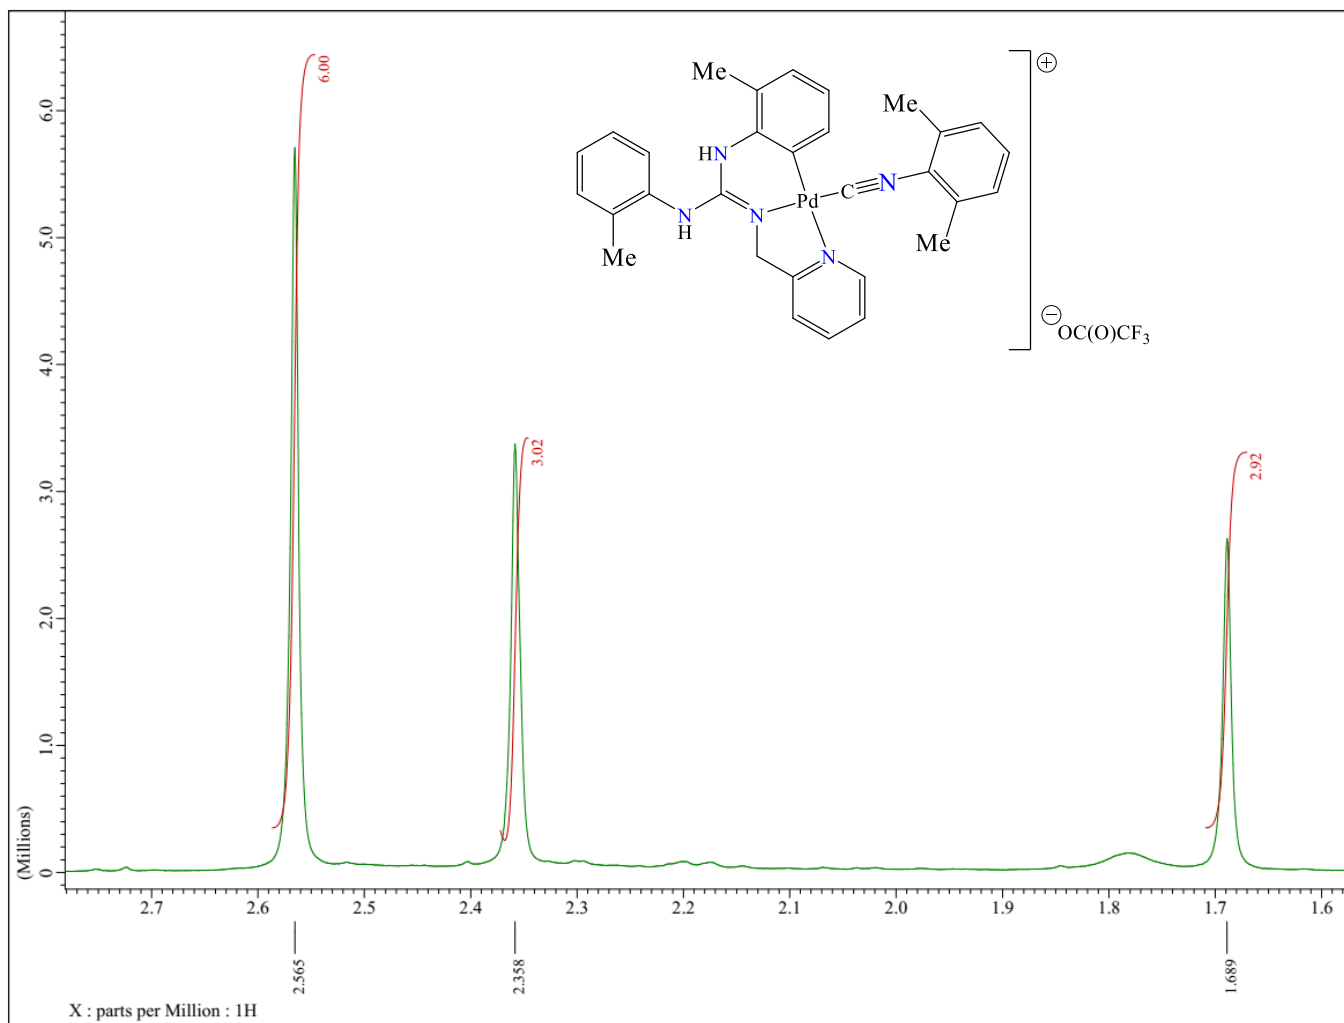

$^1\text{H}$  NMR ( $\text{CDCl}_3$ , 400 MHz) spectrum of **13** in indicated region.

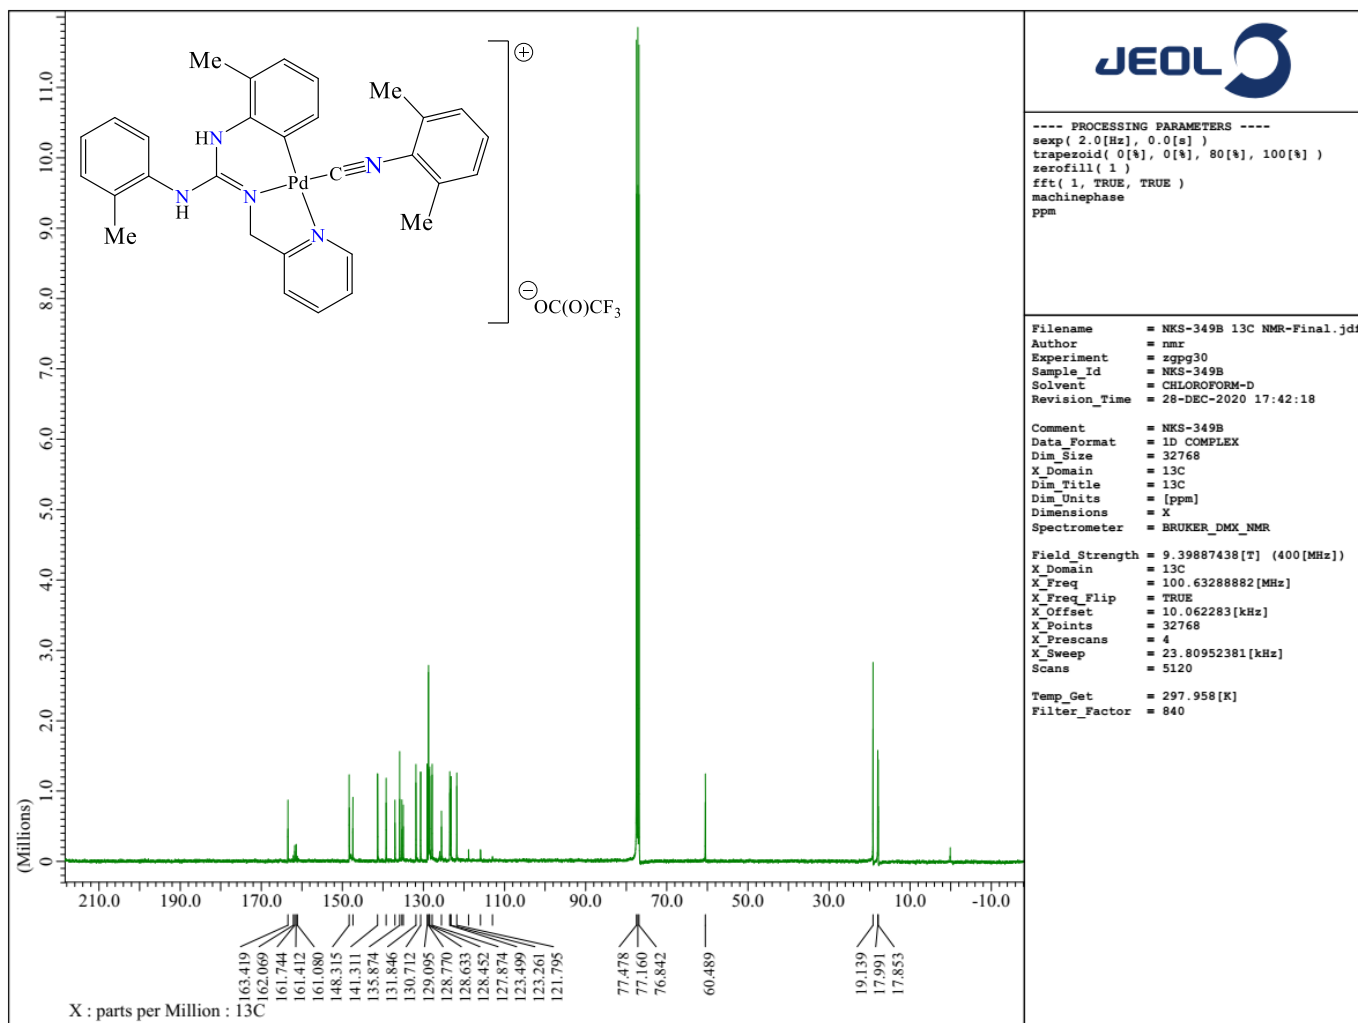

$^{13}\text{C}\{^1\text{H}\}$  NMR ( $\text{CDCl}_3$ , 100.5 MHz) spectrum of **13**.



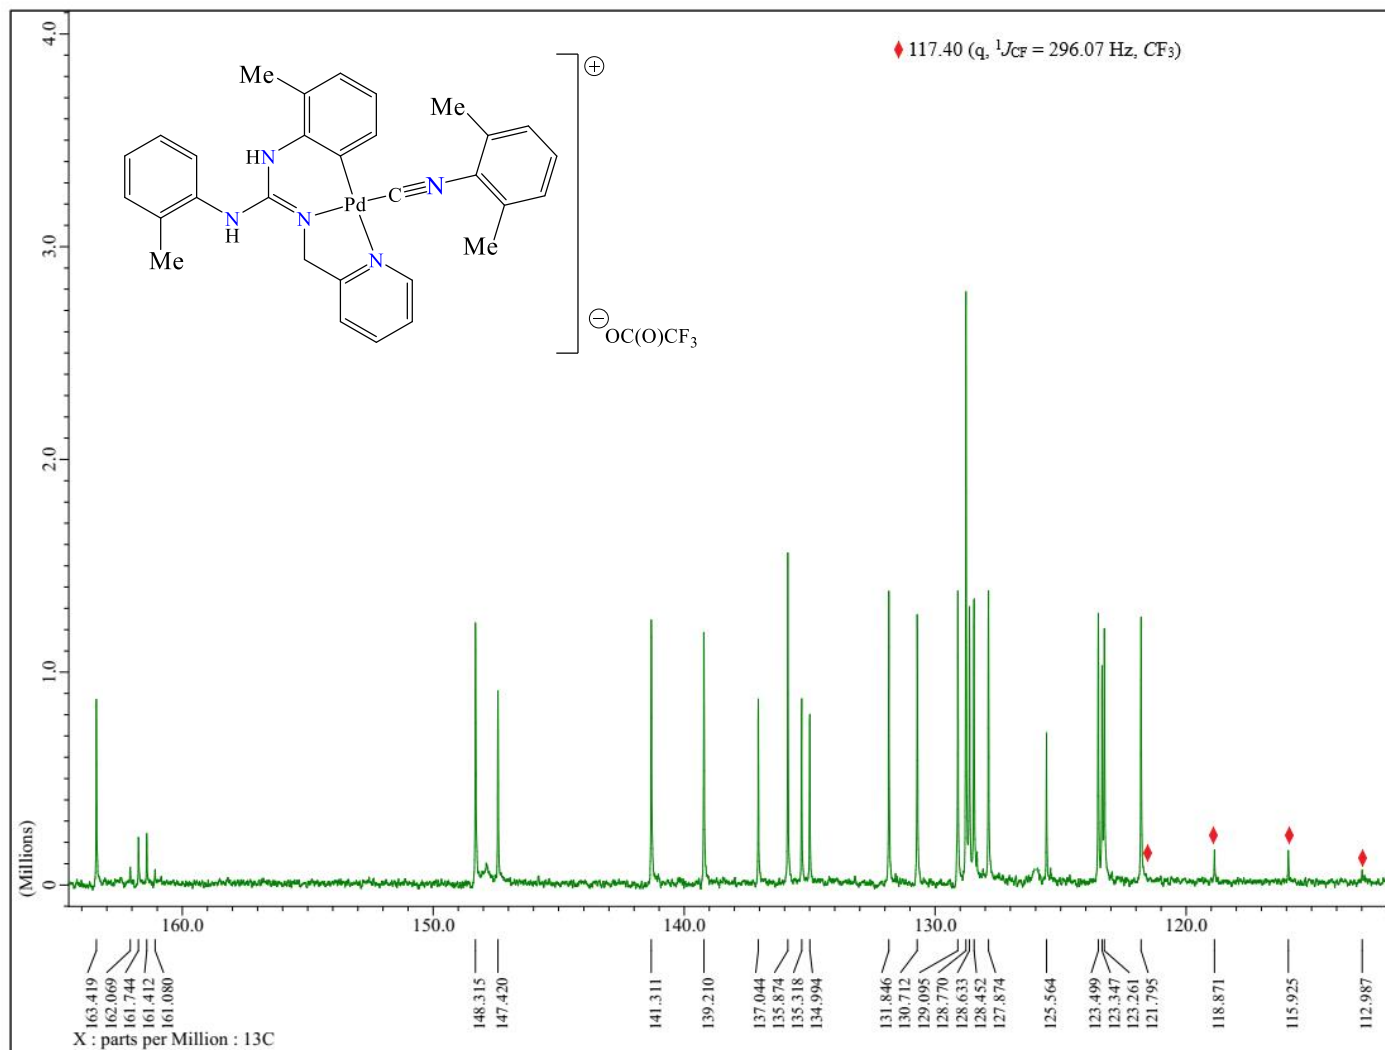

$^{13}\text{C}\{^1\text{H}\}$  NMR (CDCl<sub>3</sub>, 100.5 MHz) spectrum of **13** in indicated region.

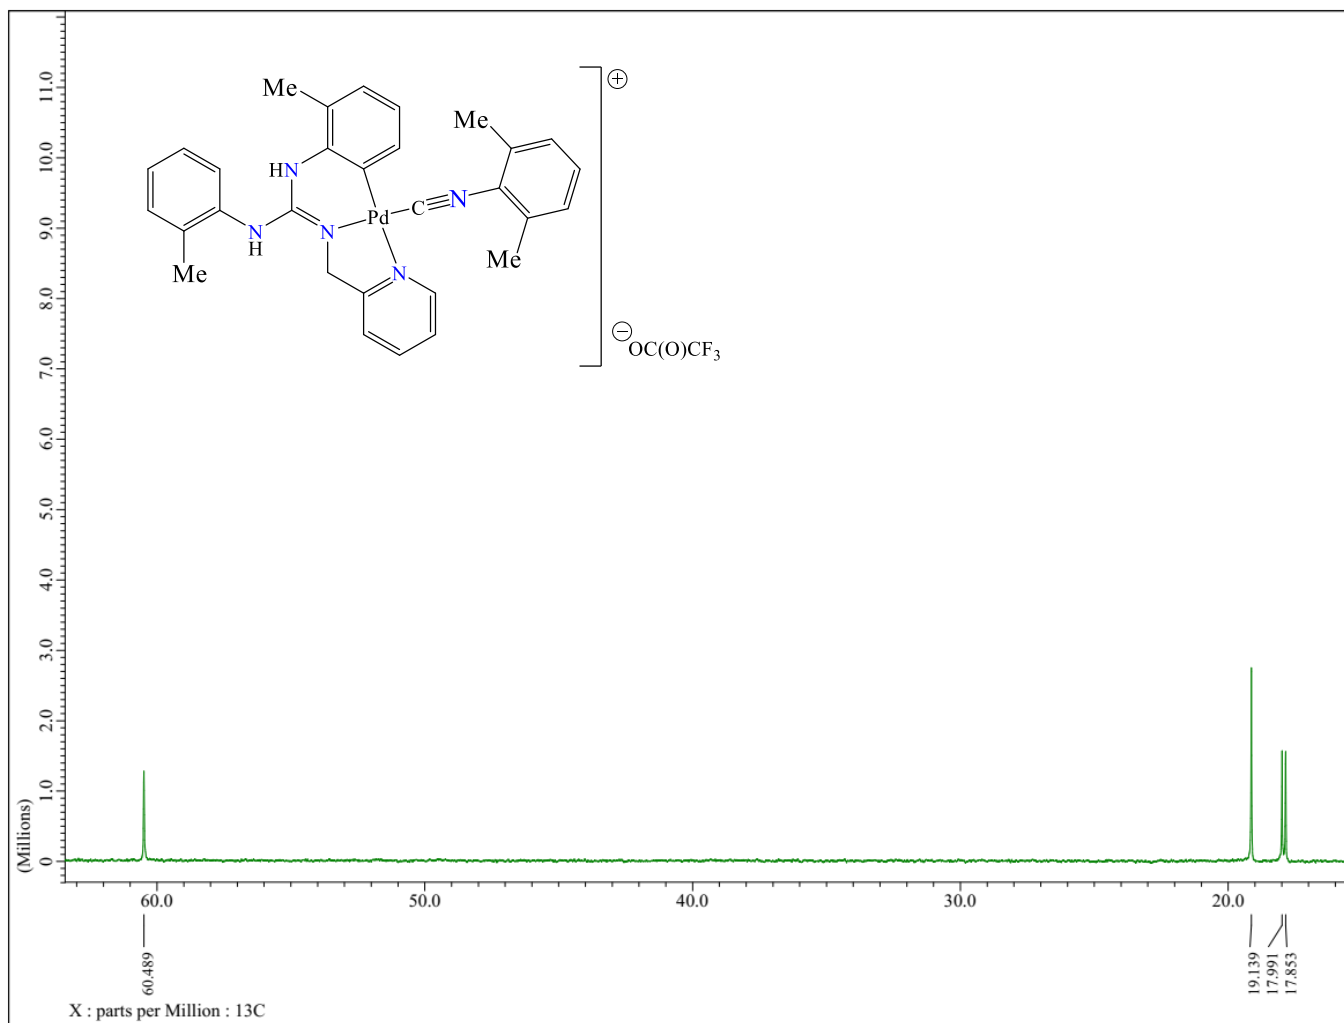

$^{13}\text{C}\{^1\text{H}\}$  NMR ( $\text{CDCl}_3$ , 100.5 MHz) spectrum of **13** in indicated region.

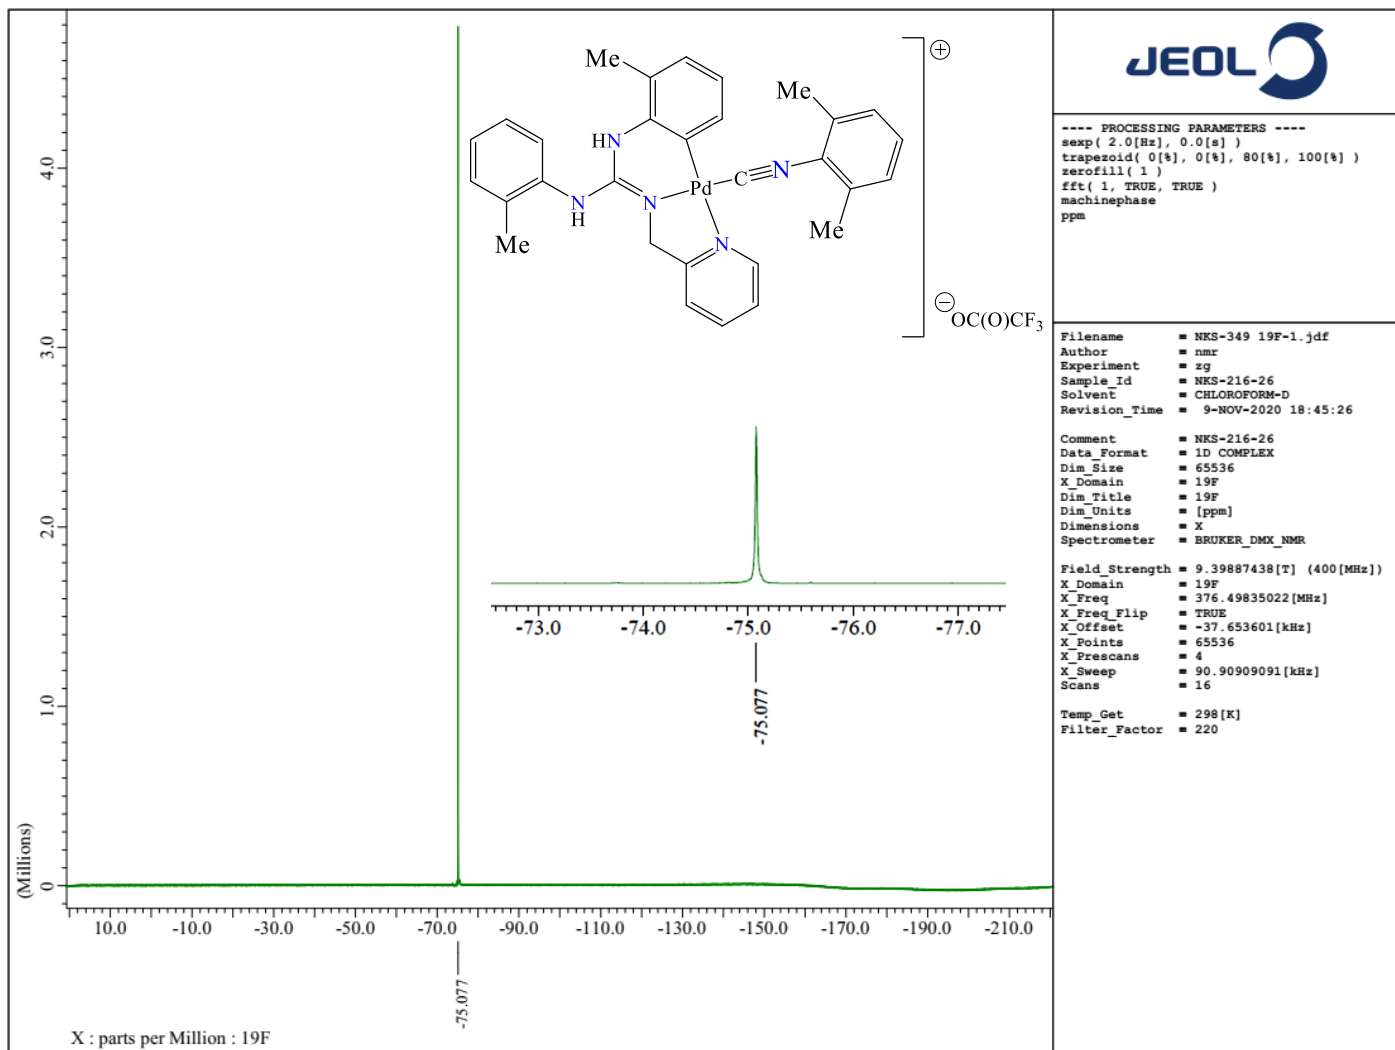

$^{19}\text{F}$  NMR ( $\text{CDCl}_3$ , 376.5 MHz) spectrum of **13** in indicated region.

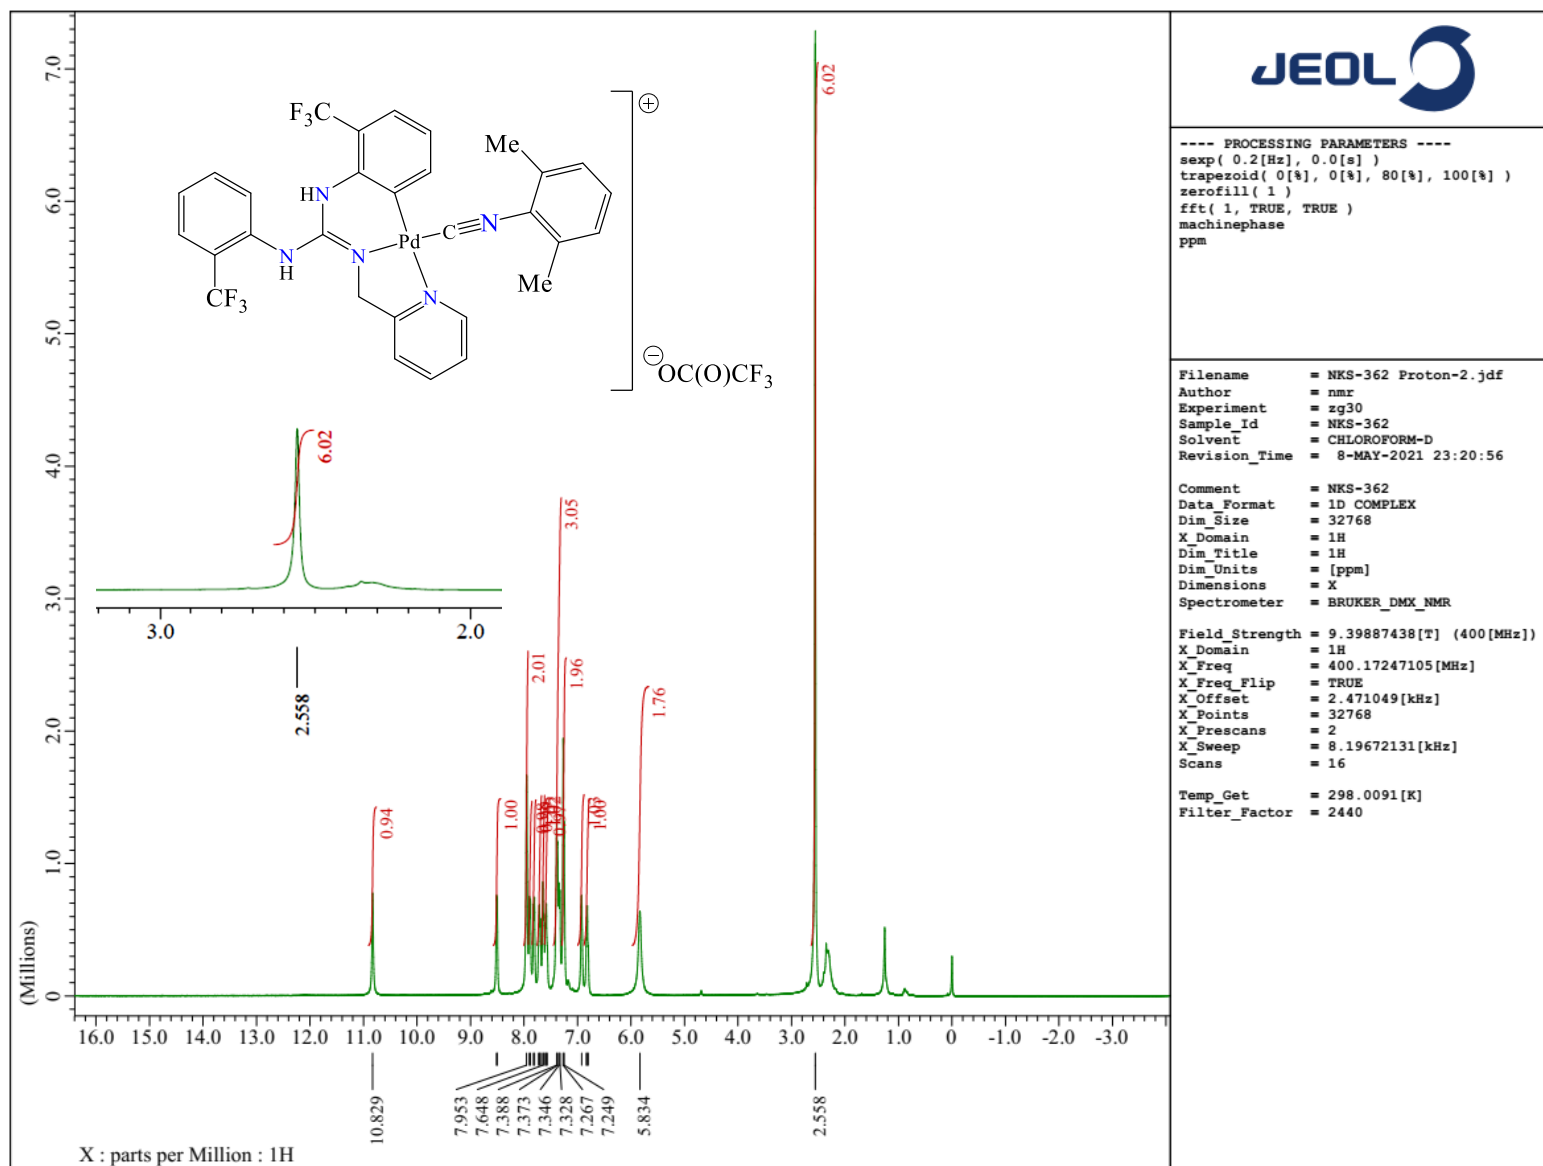

$^1\text{H}$  NMR ( $\text{CDCl}_3$ , 400 MHz) spectrum of **14**.

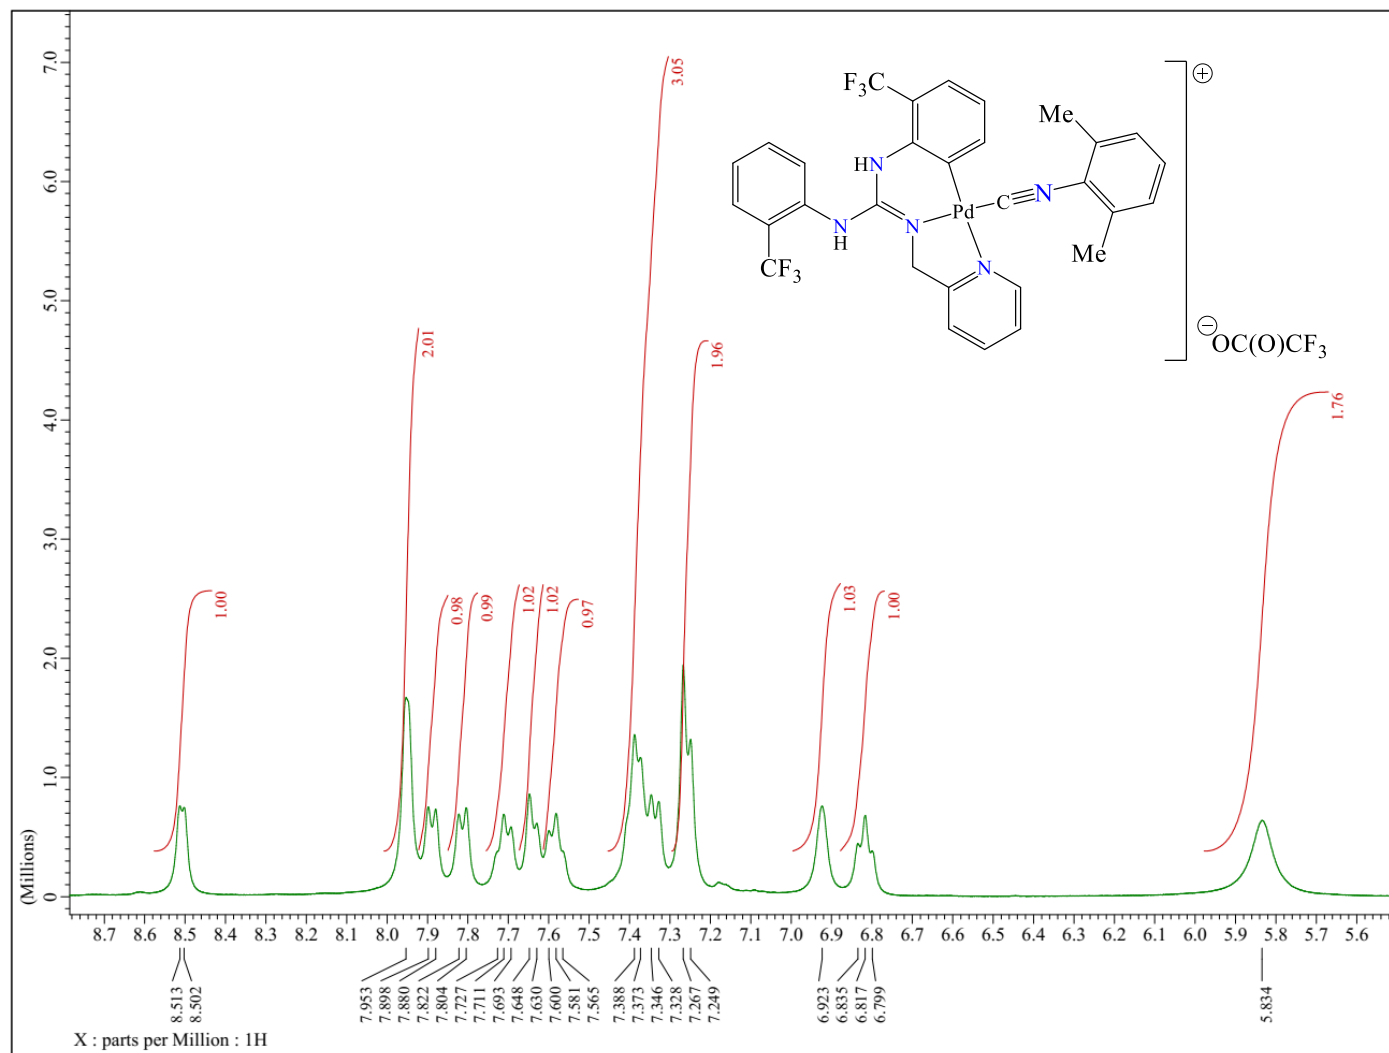

$^1\text{H NMR}$  (CDCl<sub>3</sub>, 400 MHz) spectrum of **14** in indicated region.

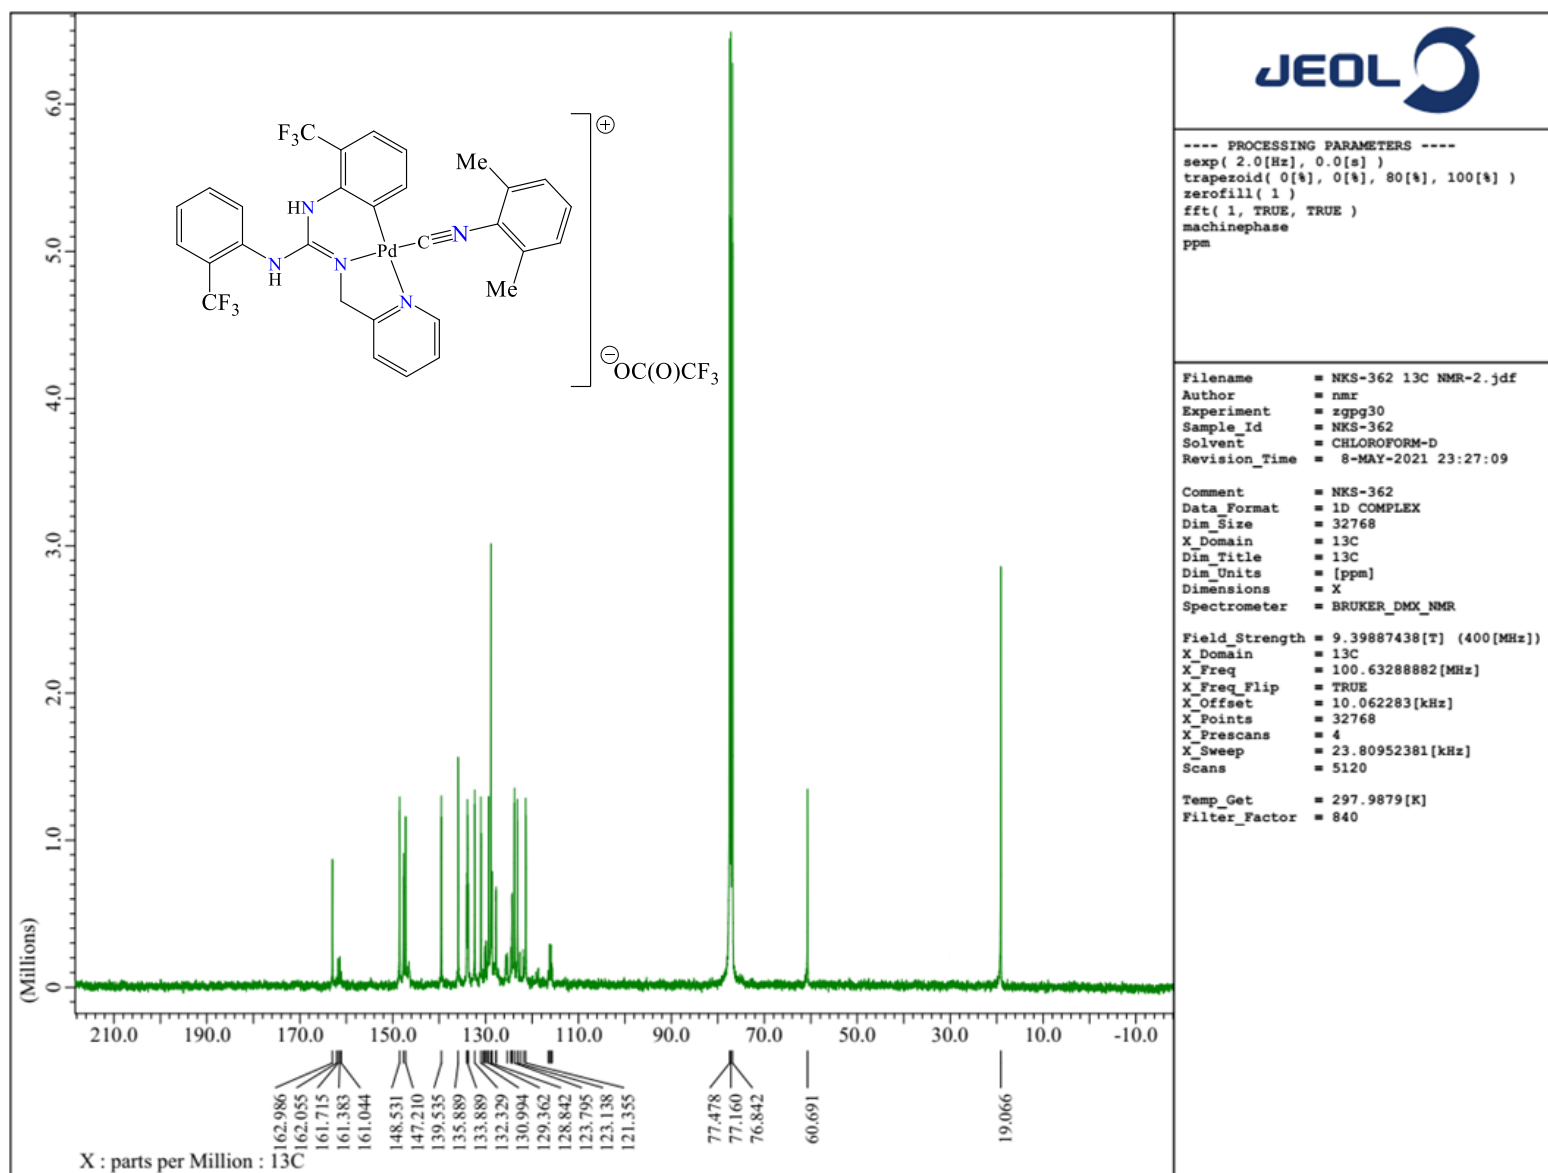

$^{13}\text{C}\{^1\text{H}\}$  NMR ( $\text{CDCl}_3$ , 100.5 MHz) spectrum of **14**.

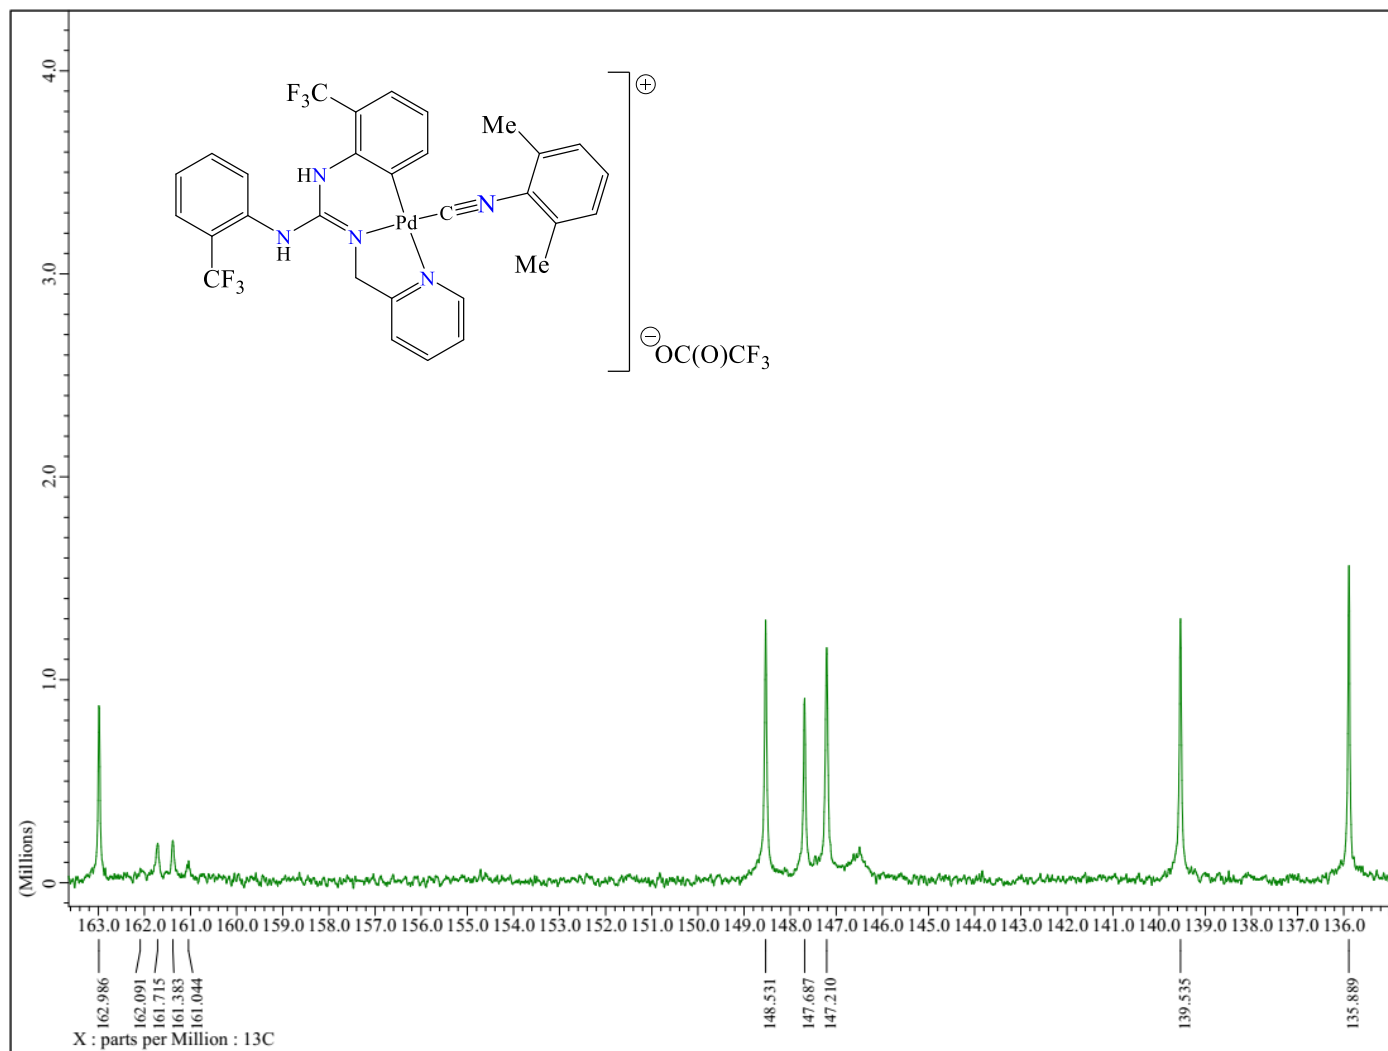

$^{13}\text{C}\{^1\text{H}\}$  NMR ( $\text{CDCl}_3$ , 100.5 MHz) spectrum of **14** in indicated region.

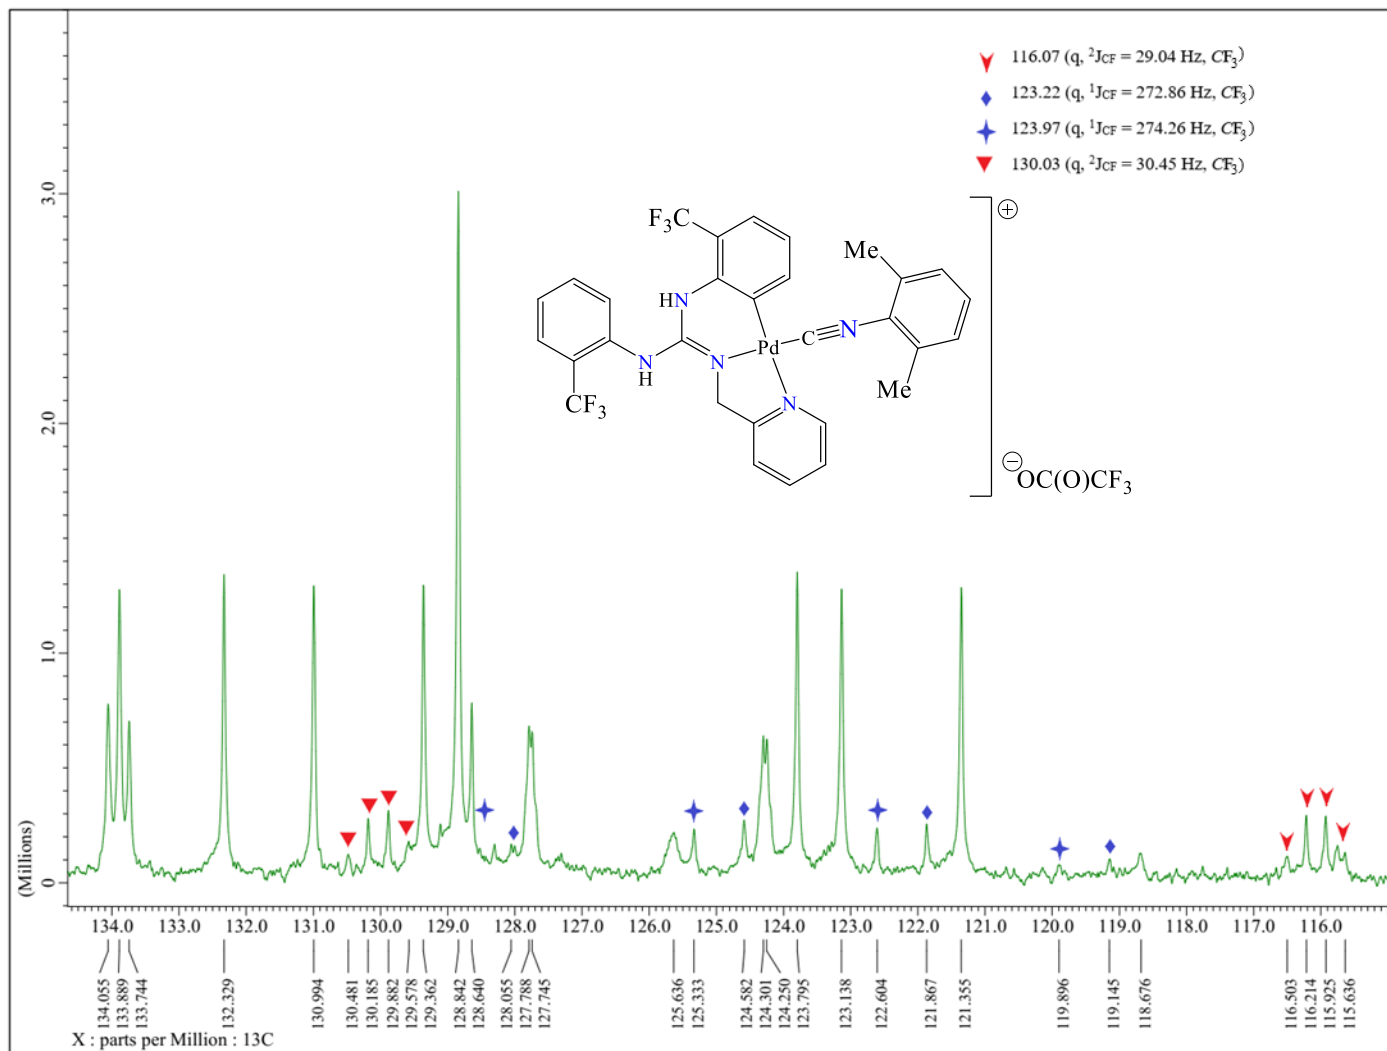

$^{13}C\{^1H\}$  NMR ( $CDCl_3$ , 100.5 MHz) spectrum of **14** in indicated region.



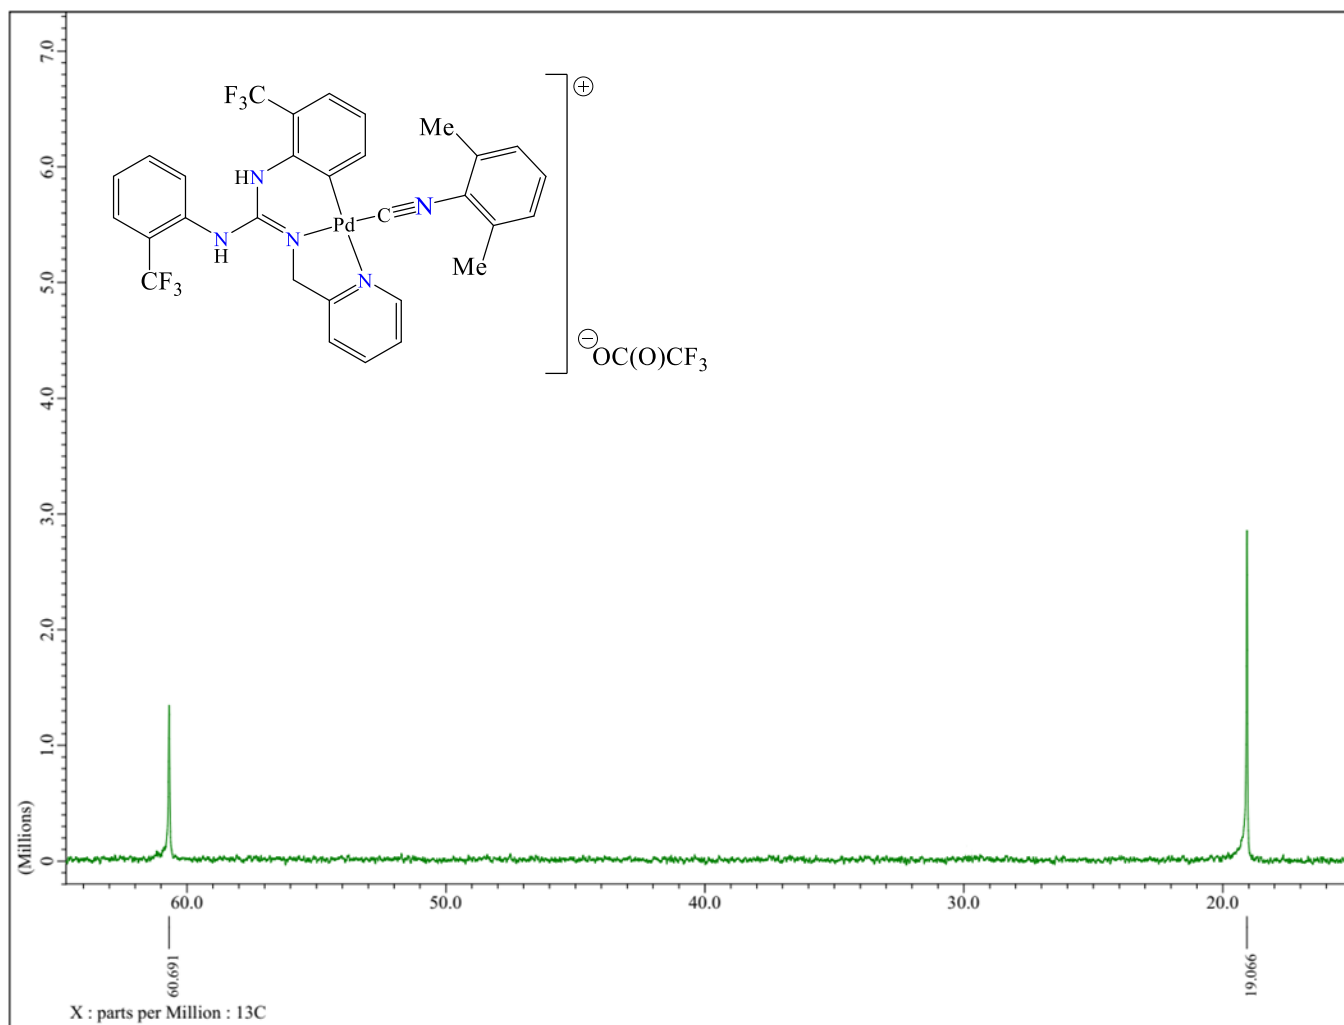

$^{13}\text{C}\{^1\text{H}\}$  NMR ( $\text{CDCl}_3$ , 100.5 MHz) spectrum of **14** in indicated region.

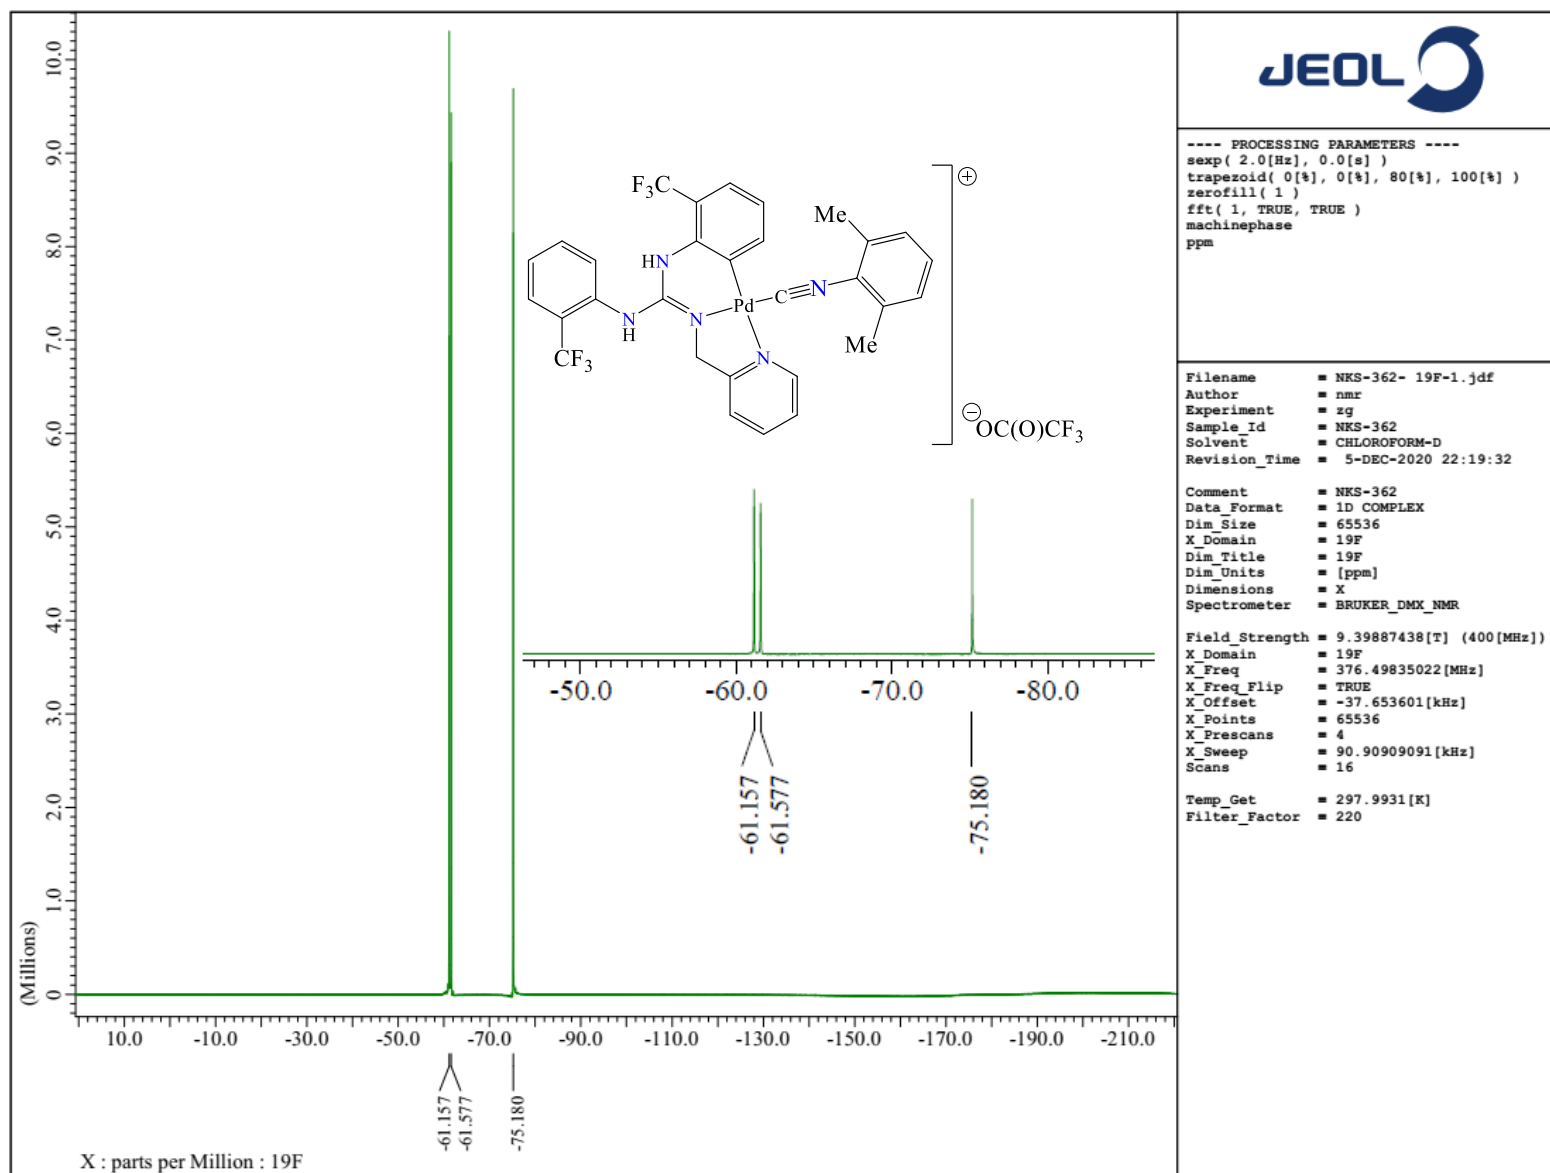

$^{19}\text{F}$  NMR ( $\text{CDCl}_3$ , 376.5 MHz) spectrum of **14**.

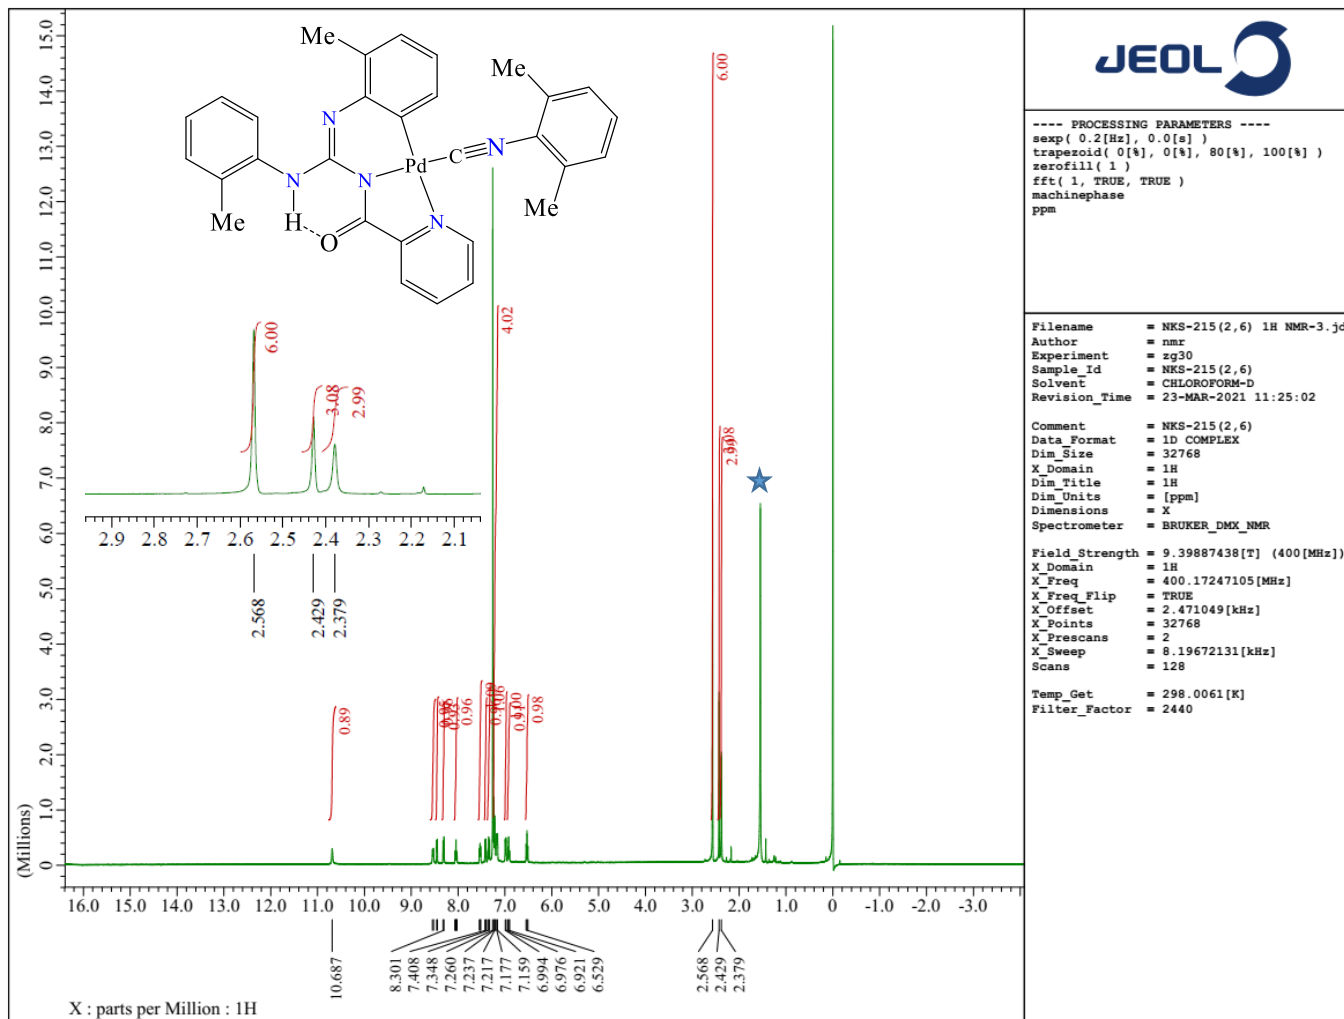

$^1\text{H}$  NMR ( $\text{CDCl}_3$ , 400 MHz) spectrum of **15**. The ★ symbol indicates protons of residual water.

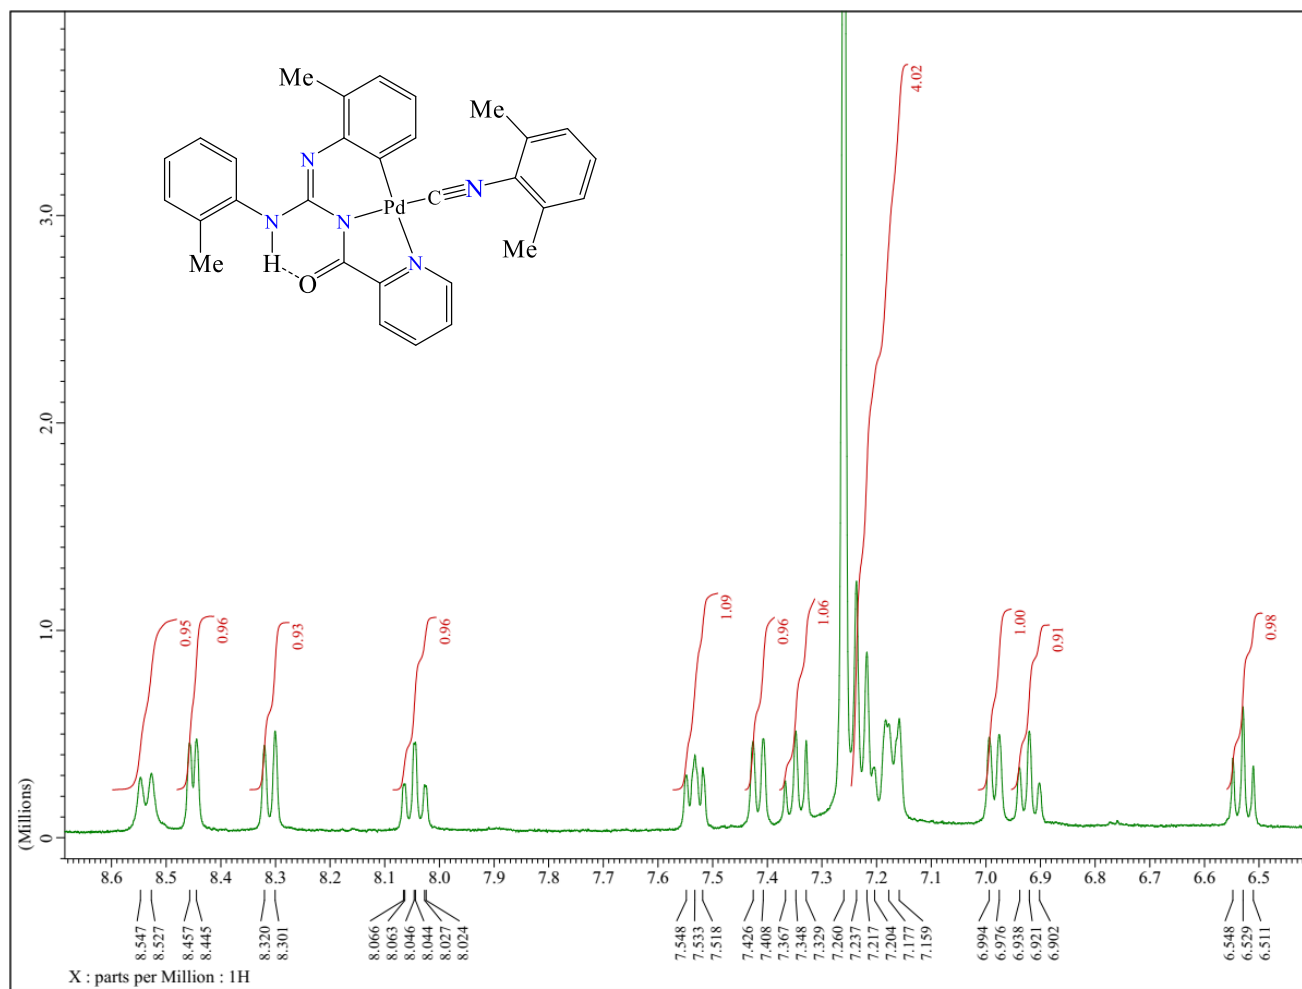

<sup>1</sup>H NMR (CDCl<sub>3</sub>, 400 MHz) spectrum of **15** in indicated region.

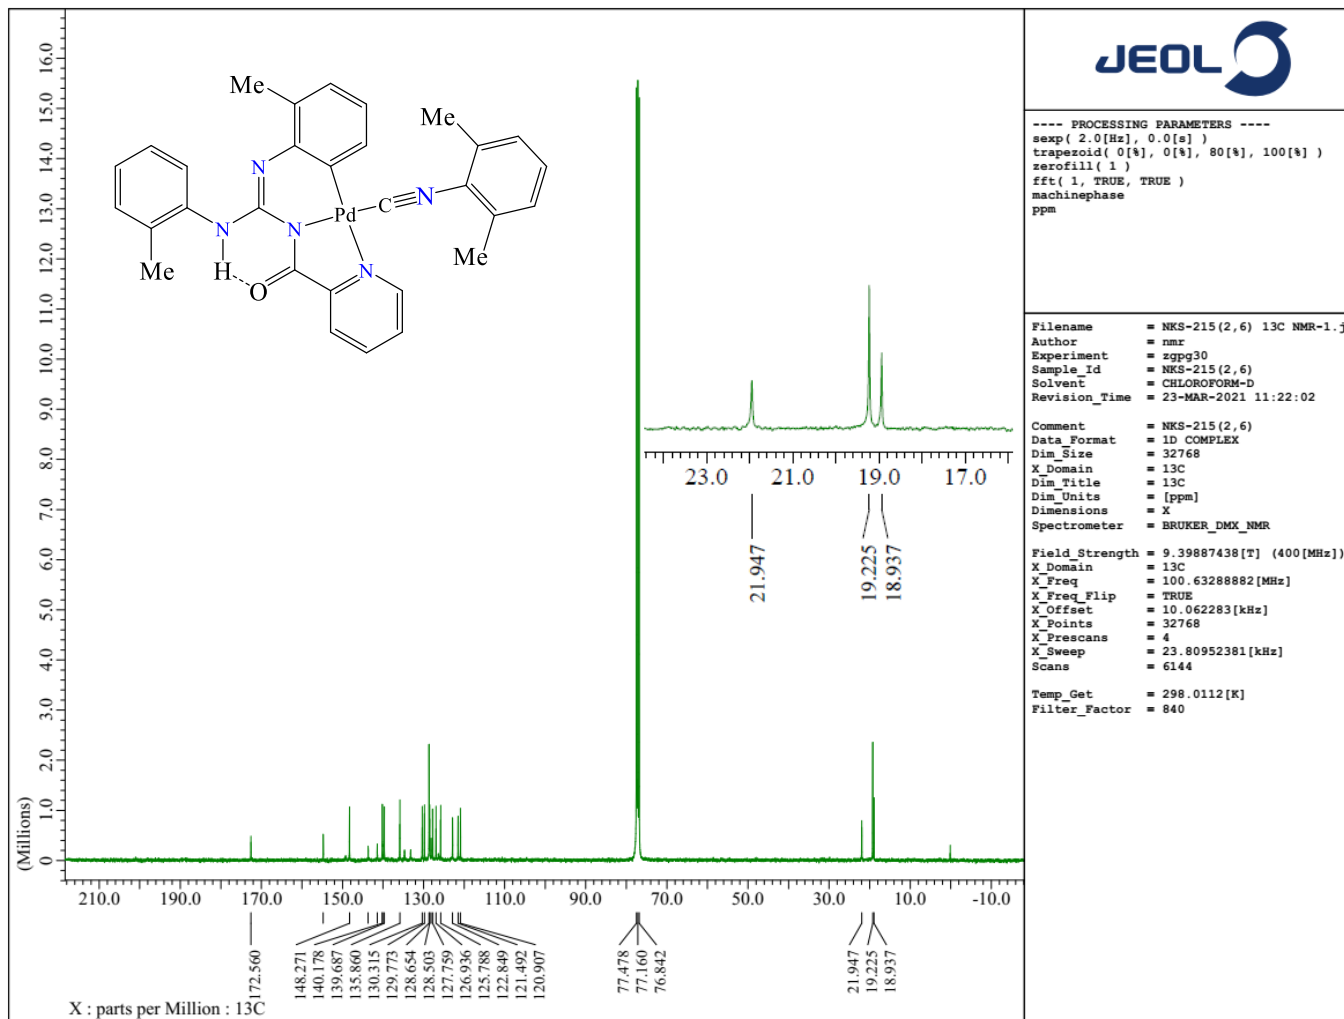

$^{13}\text{C}\{^1\text{H}\}$  NMR ( $\text{CDCl}_3$ , 100.5 MHz) spectrum of **15**.

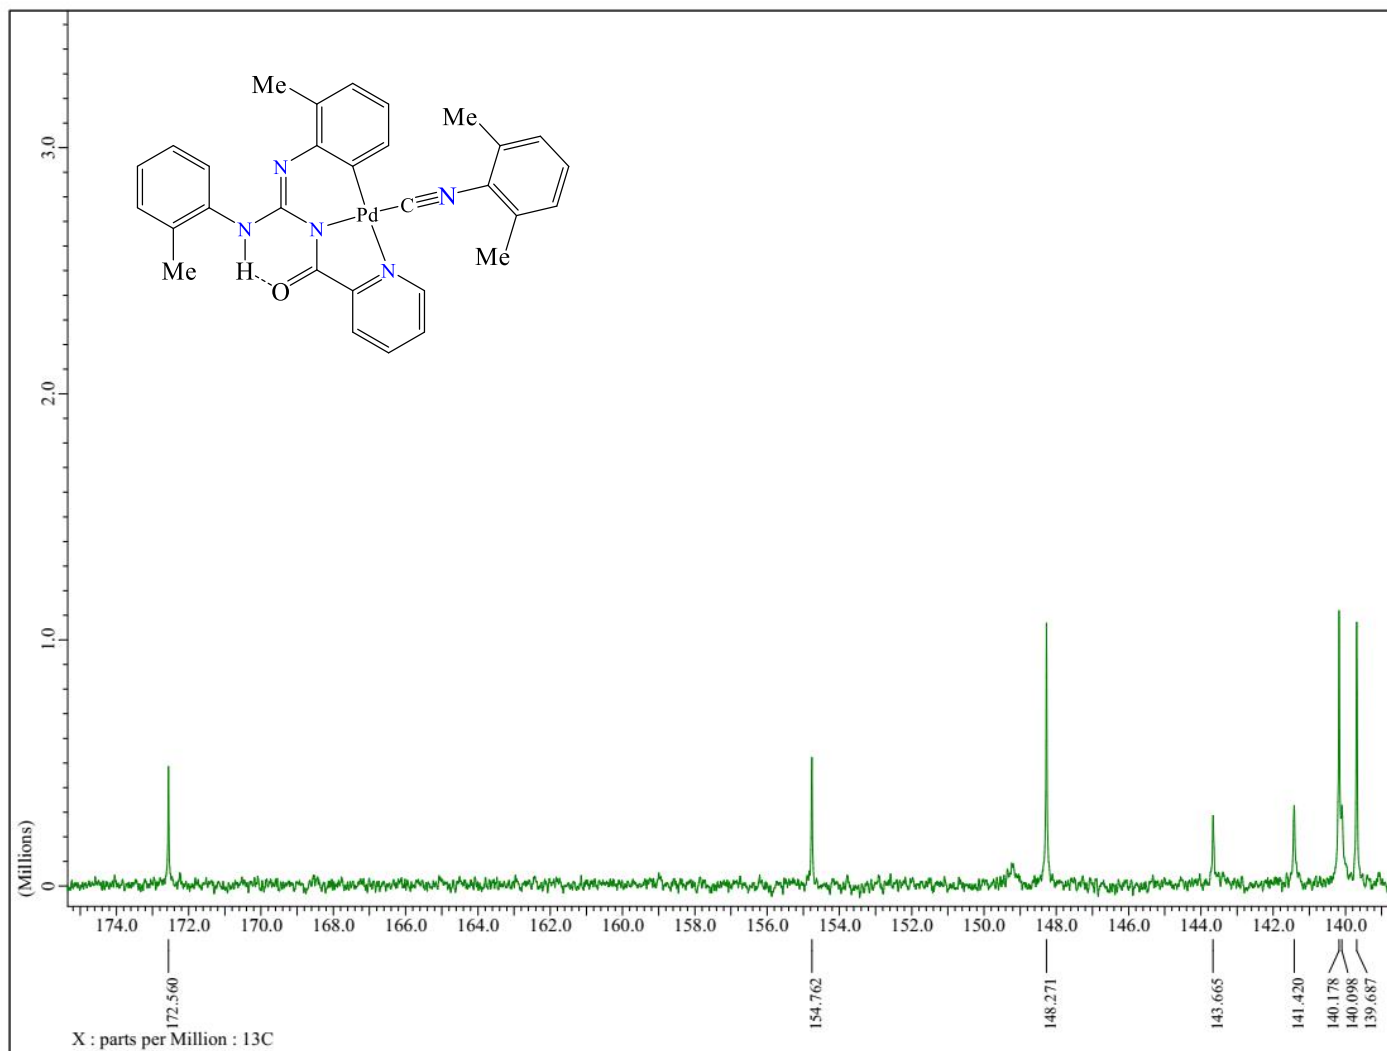

$^{13}\text{C}\{^1\text{H}\}$  NMR ( $\text{CDCl}_3$ , 100.5 MHz) spectrum of **15** in indicated region.

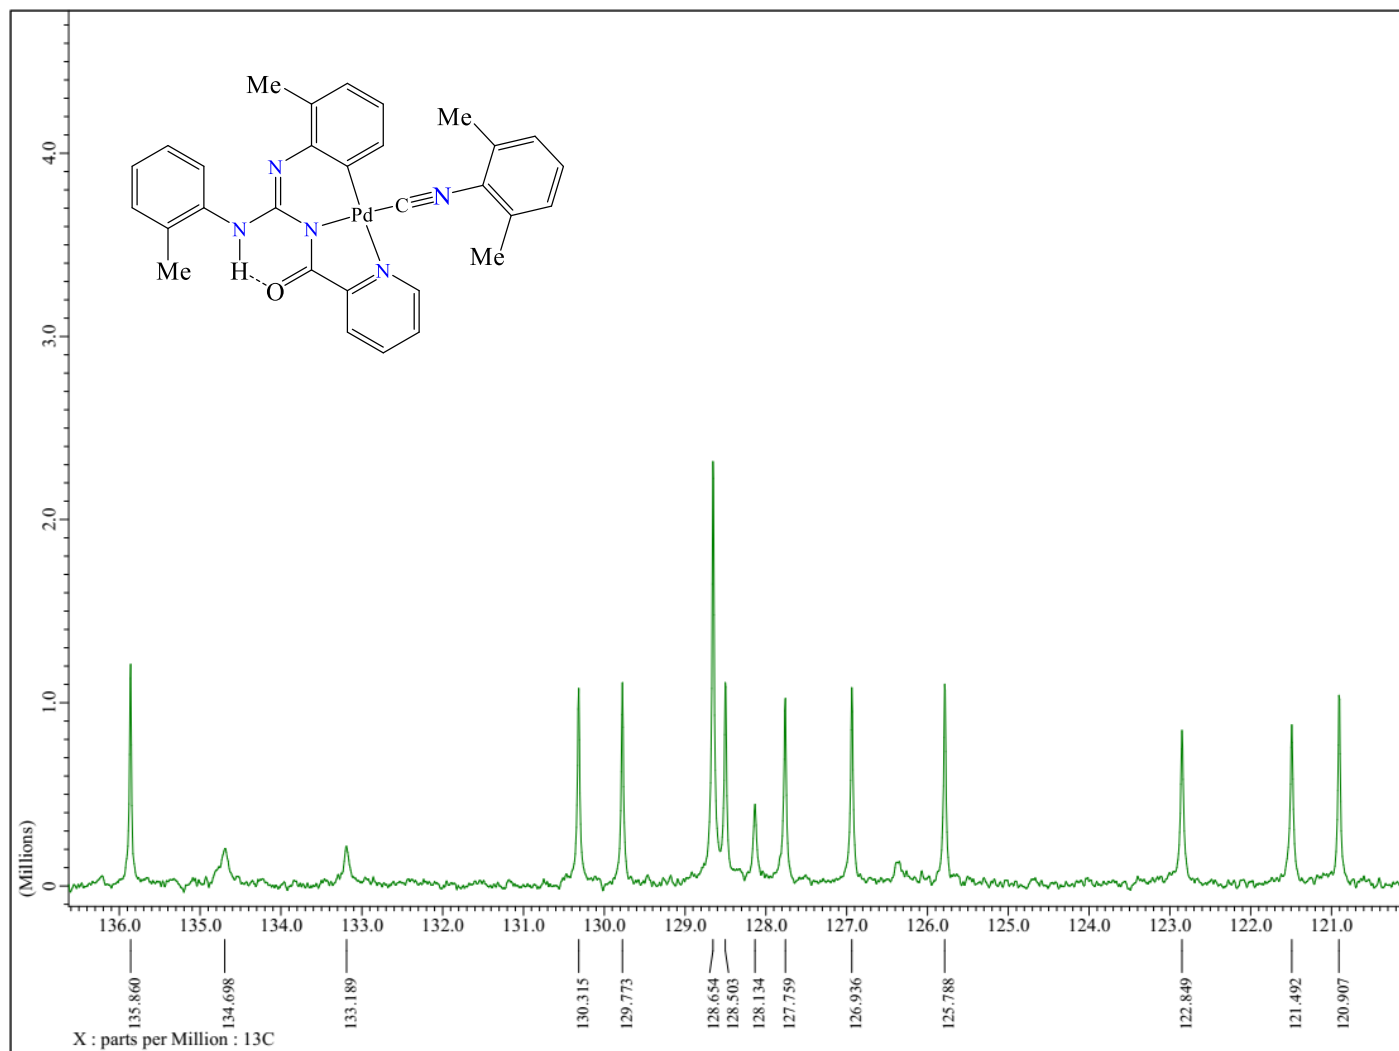

$^{13}\text{C}\{^1\text{H}\}$  NMR ( $\text{CDCl}_3$ , 100.5 MHz) spectrum of **15** in indicated region.

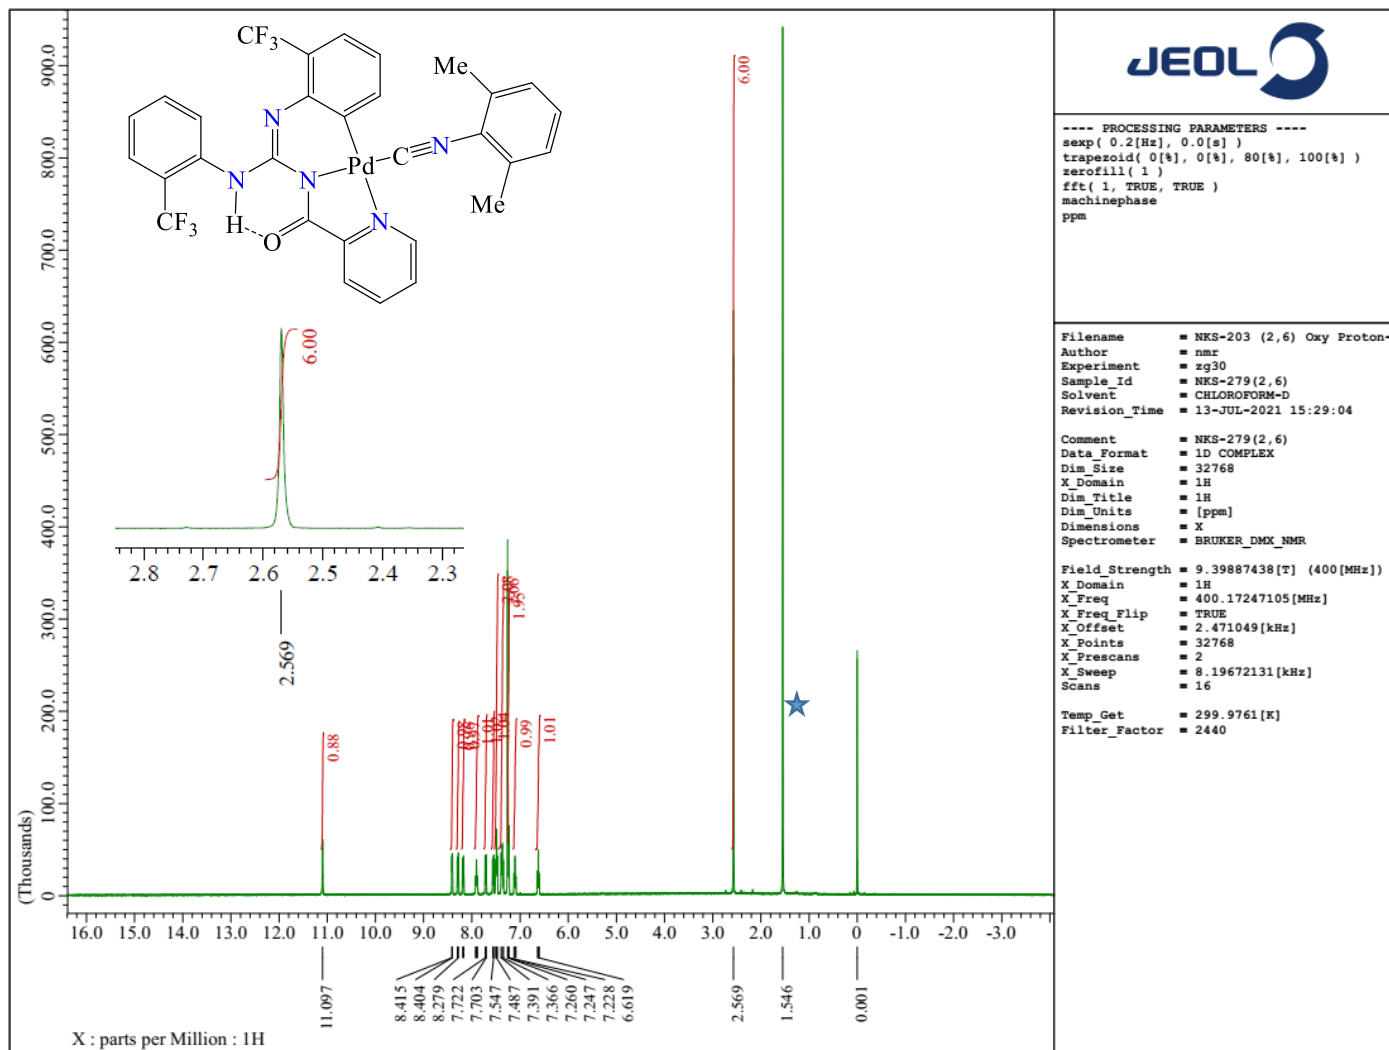

$^1\text{H}$  NMR ( $\text{CDCl}_3$ , 400 MHz) spectrum of **16**. The ★ symbol indicates protons of residual water.



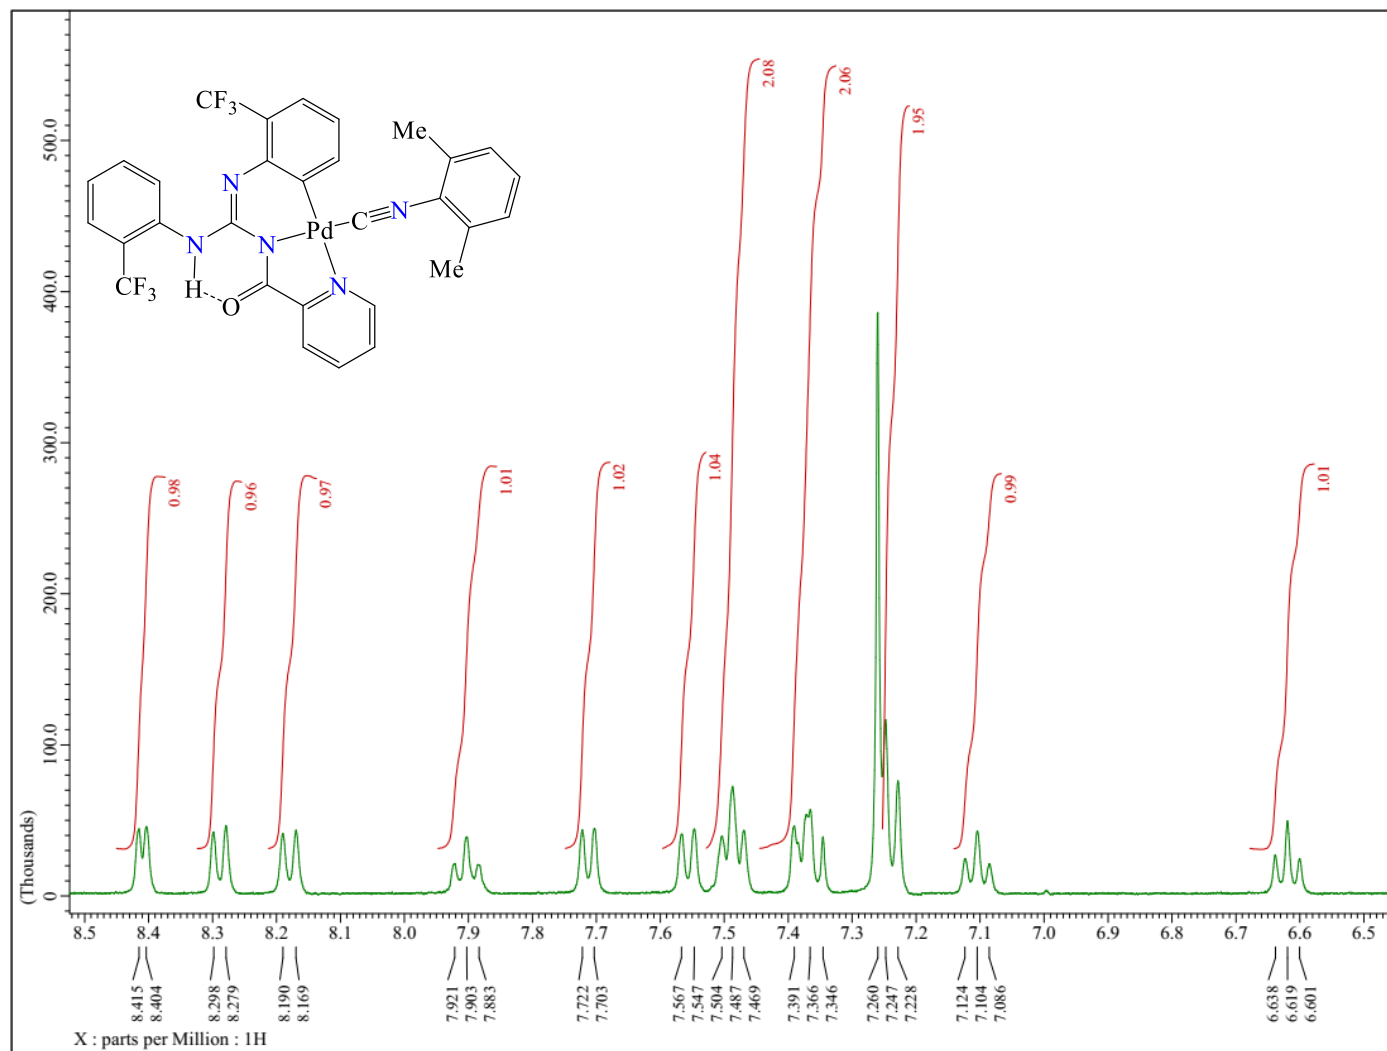

$^1\text{H}$  NMR (CDCl<sub>3</sub>, 400 MHz) spectrum of **16** in indicated region.

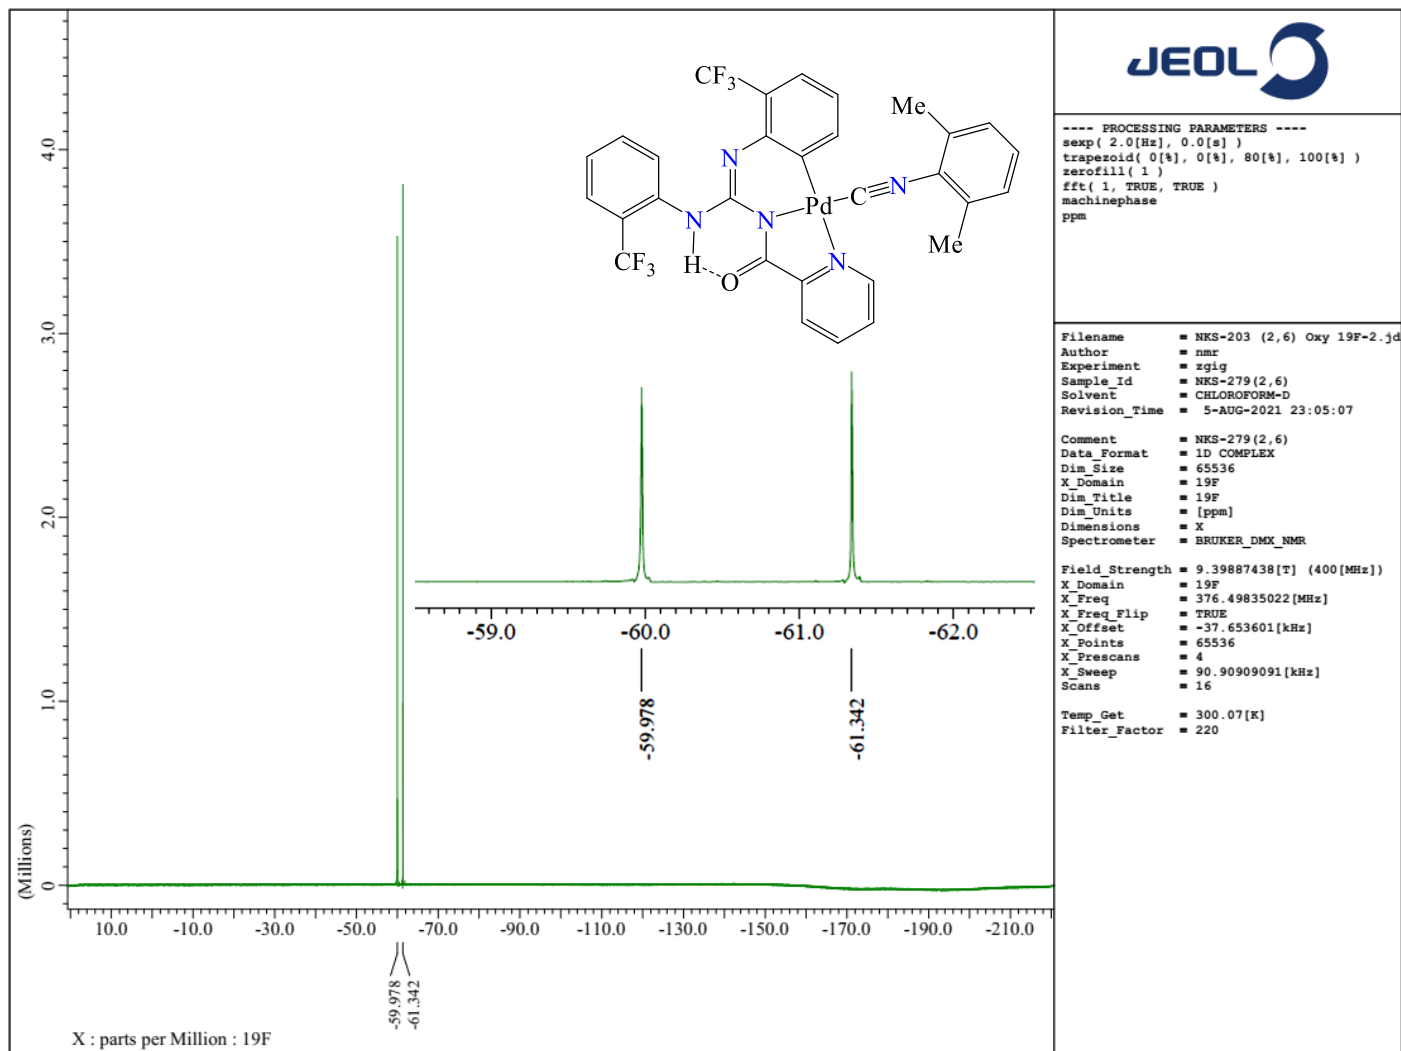

$^{19}\text{F}$  NMR ( $\text{CDCl}_3$ , 376.5 MHz) spectrum of **16**.

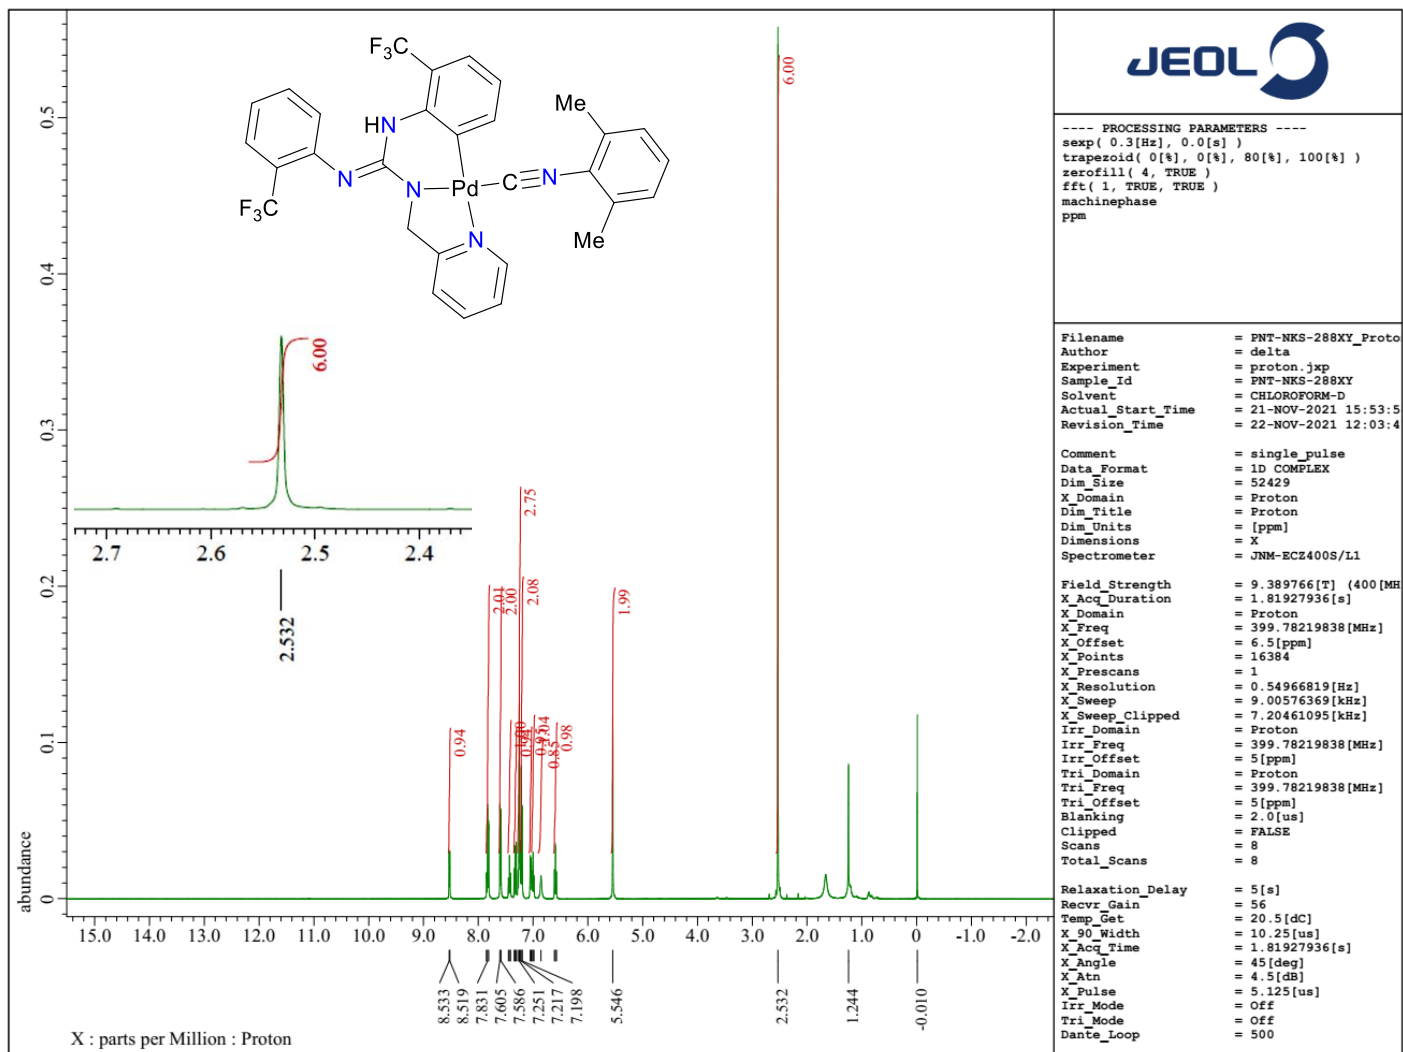

$^1\text{H}$  NMR ( $\text{CDCl}_3$ , 400 MHz) spectrum of **17**.

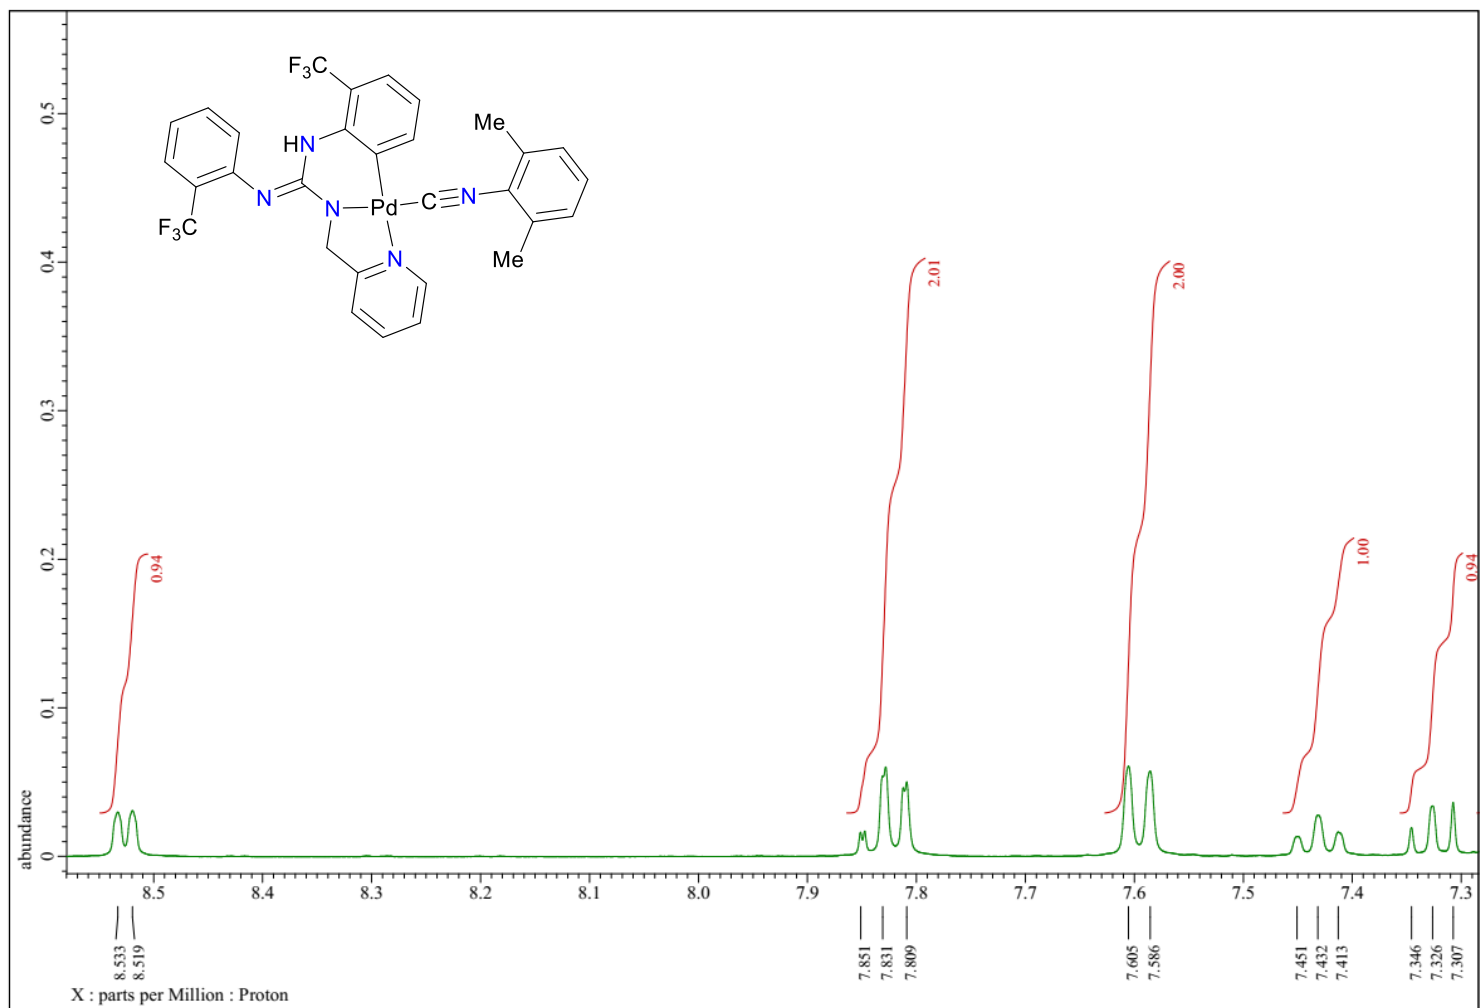

$^1\text{H}$  NMR ( $\text{CDCl}_3$ , 400 MHz) spectrum of **17** in indicated region.

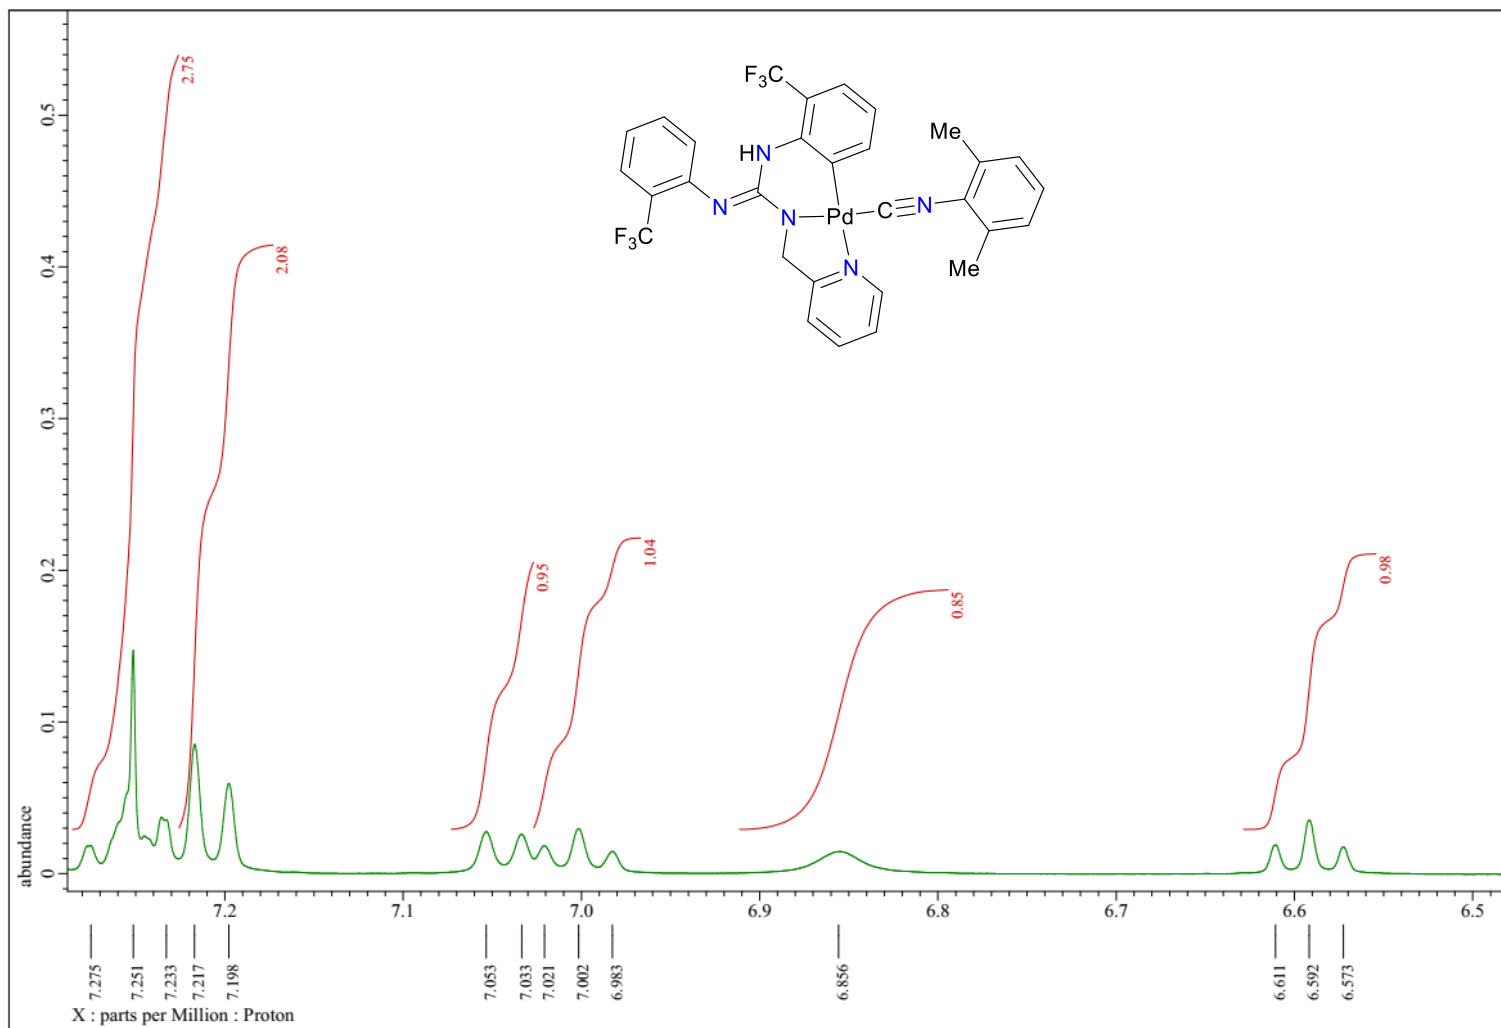

<sup>1</sup>H NMR (CDCl<sub>3</sub>, 400 MHz) spectrum of **17** in indicated region.

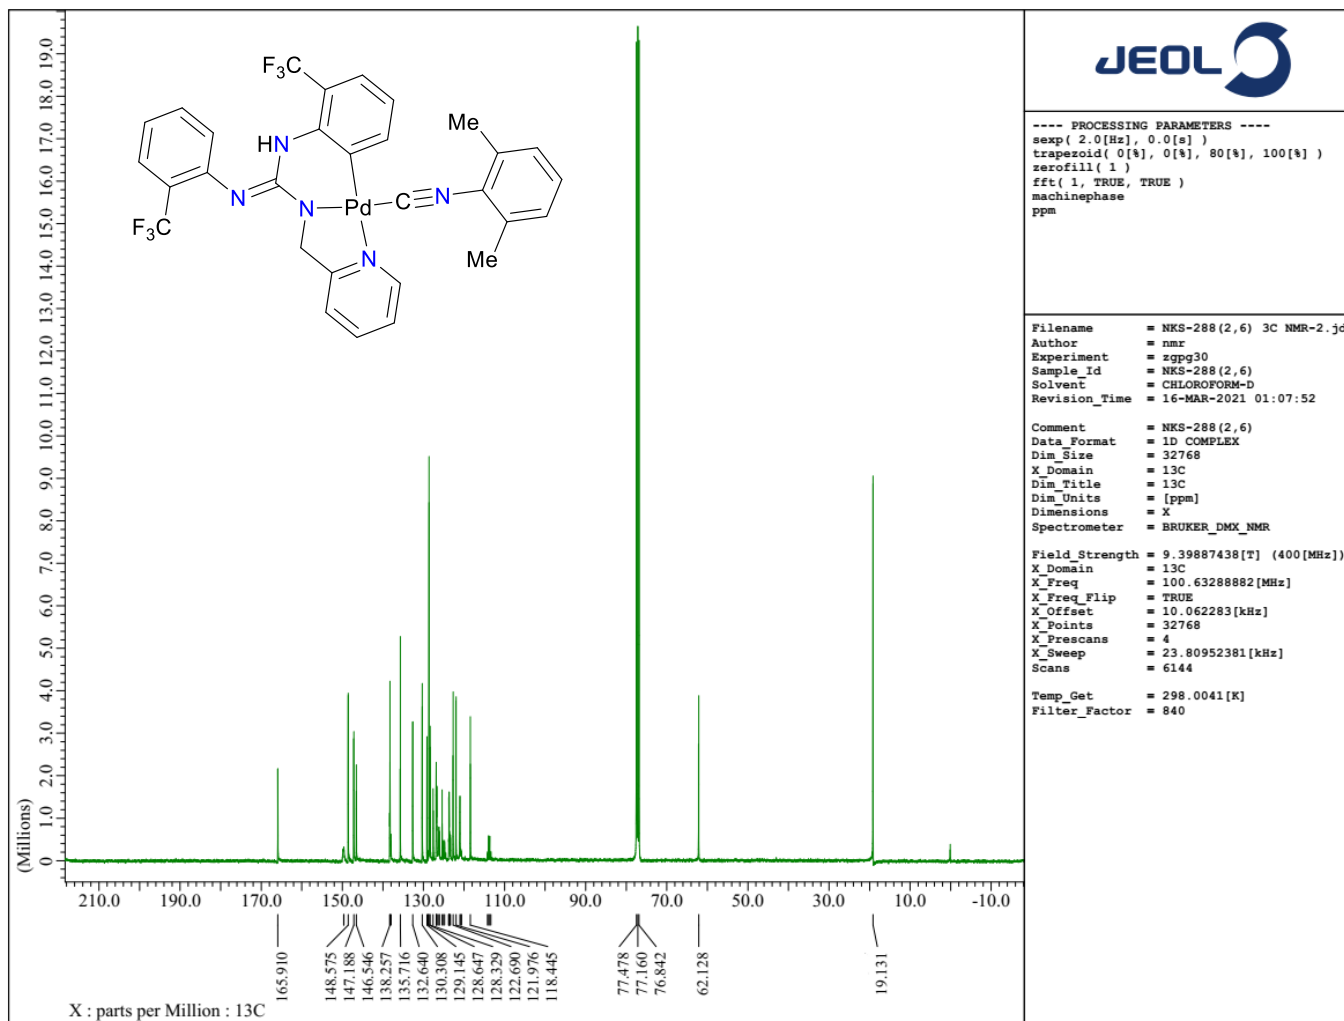

$^{13}\text{C}\{^1\text{H}\}$  NMR ( $\text{CDCl}_3$ , 100.5 MHz) spectrum of **17**.

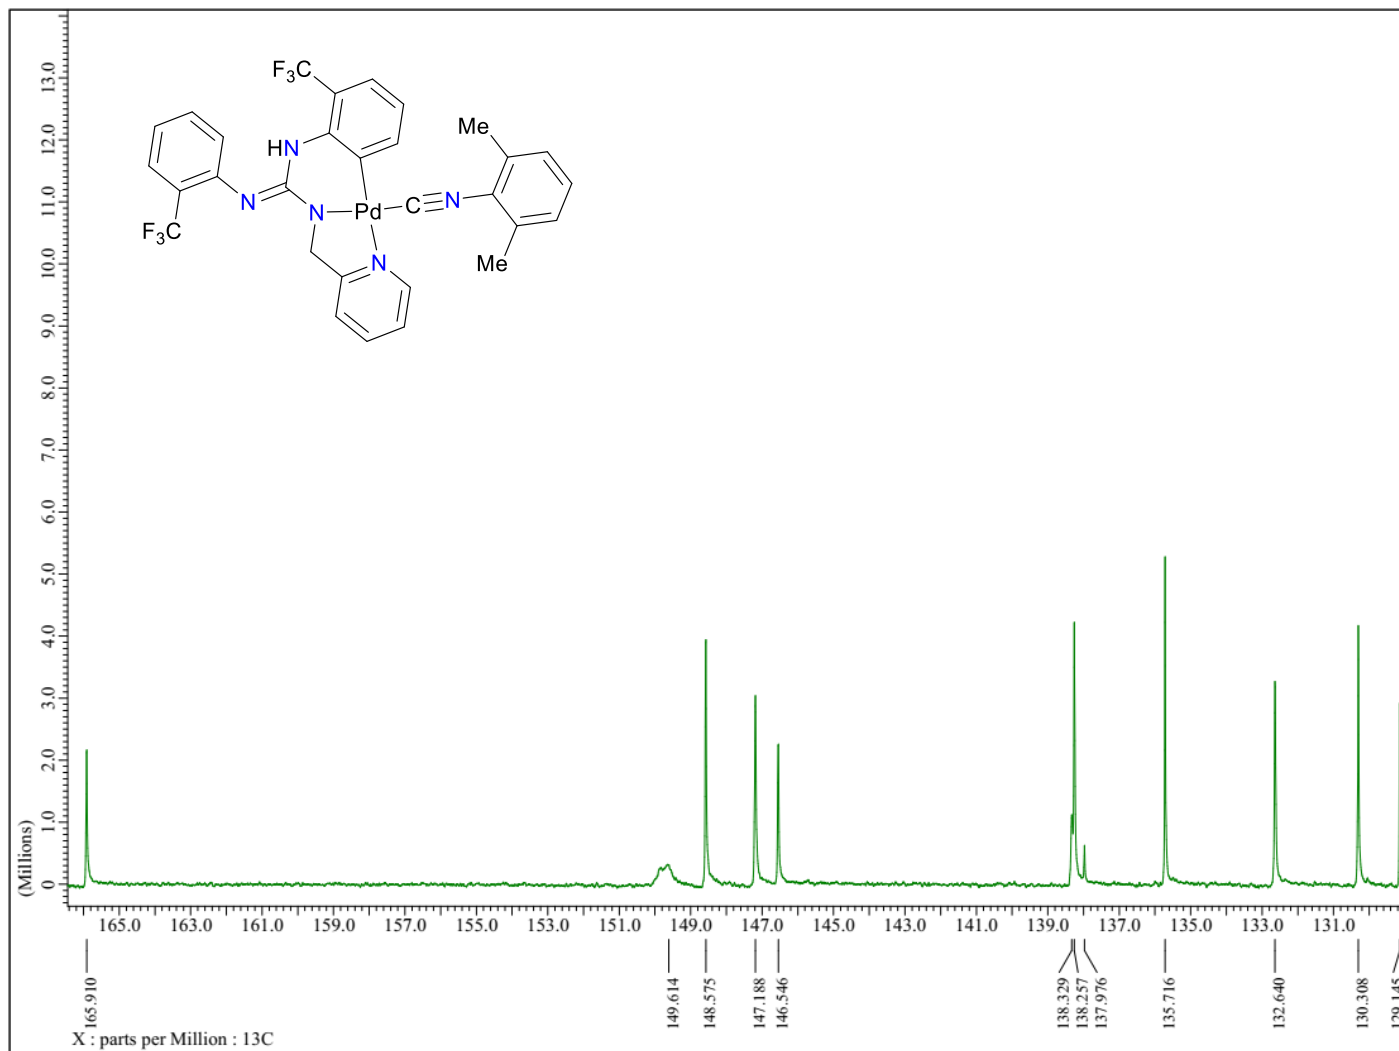

$^{13}\text{C}\{^1\text{H}\}$  NMR (CDCl<sub>3</sub>, 100.5 MHz) spectrum of **17** in indicated region.

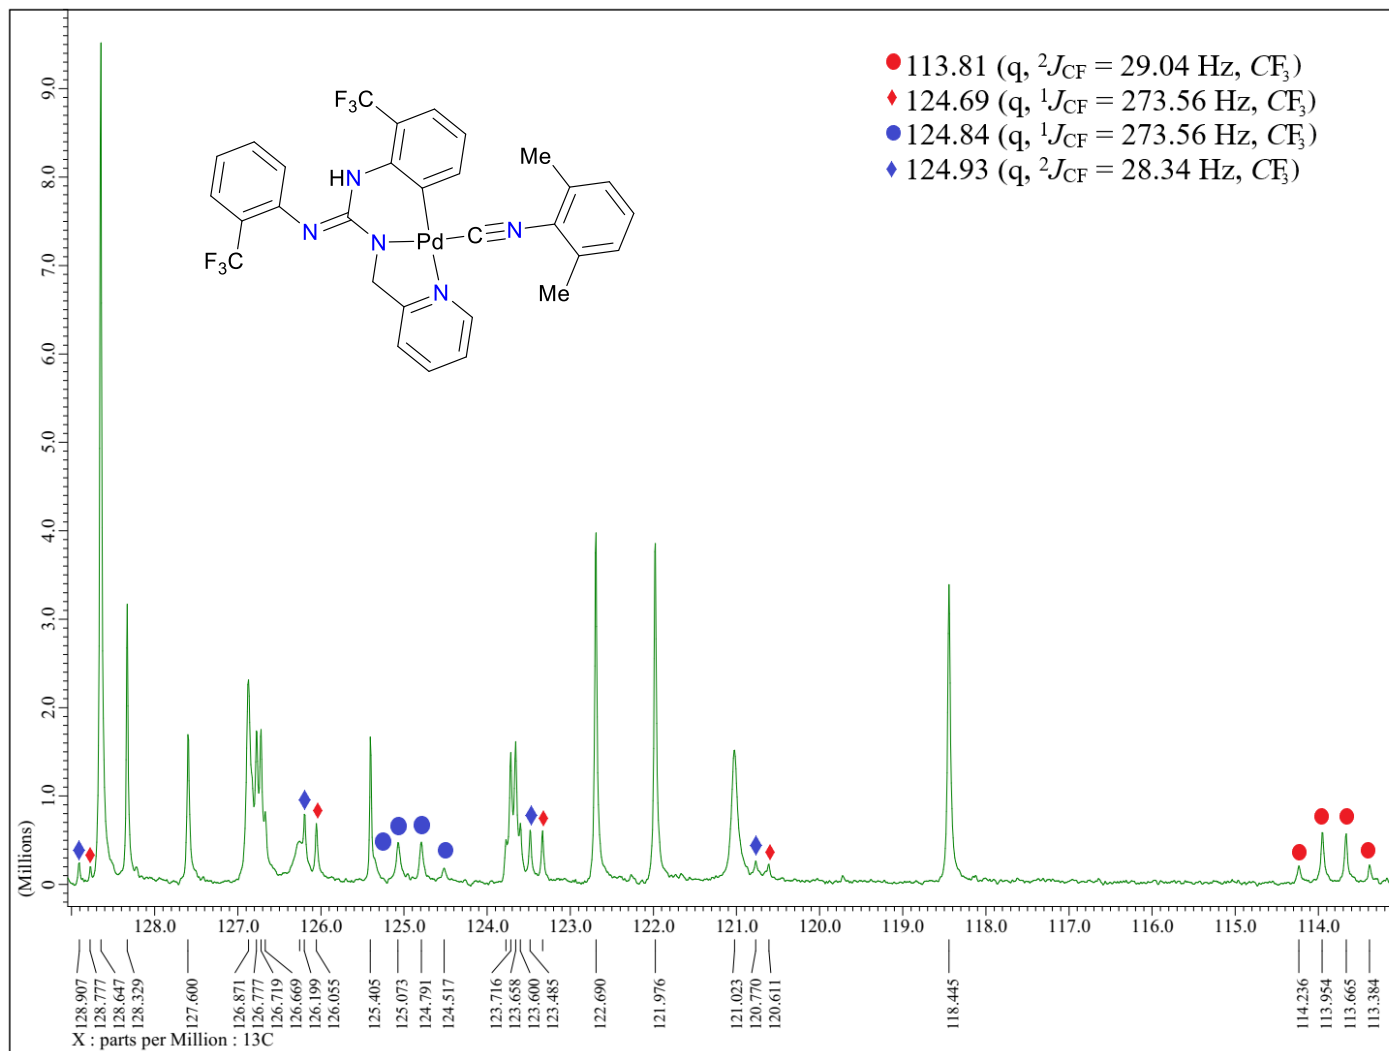

$^{13}C\{^1H\}$  NMR ( $CDCl_3$ , 100.5 MHz) spectrum of **17** in indicated region.



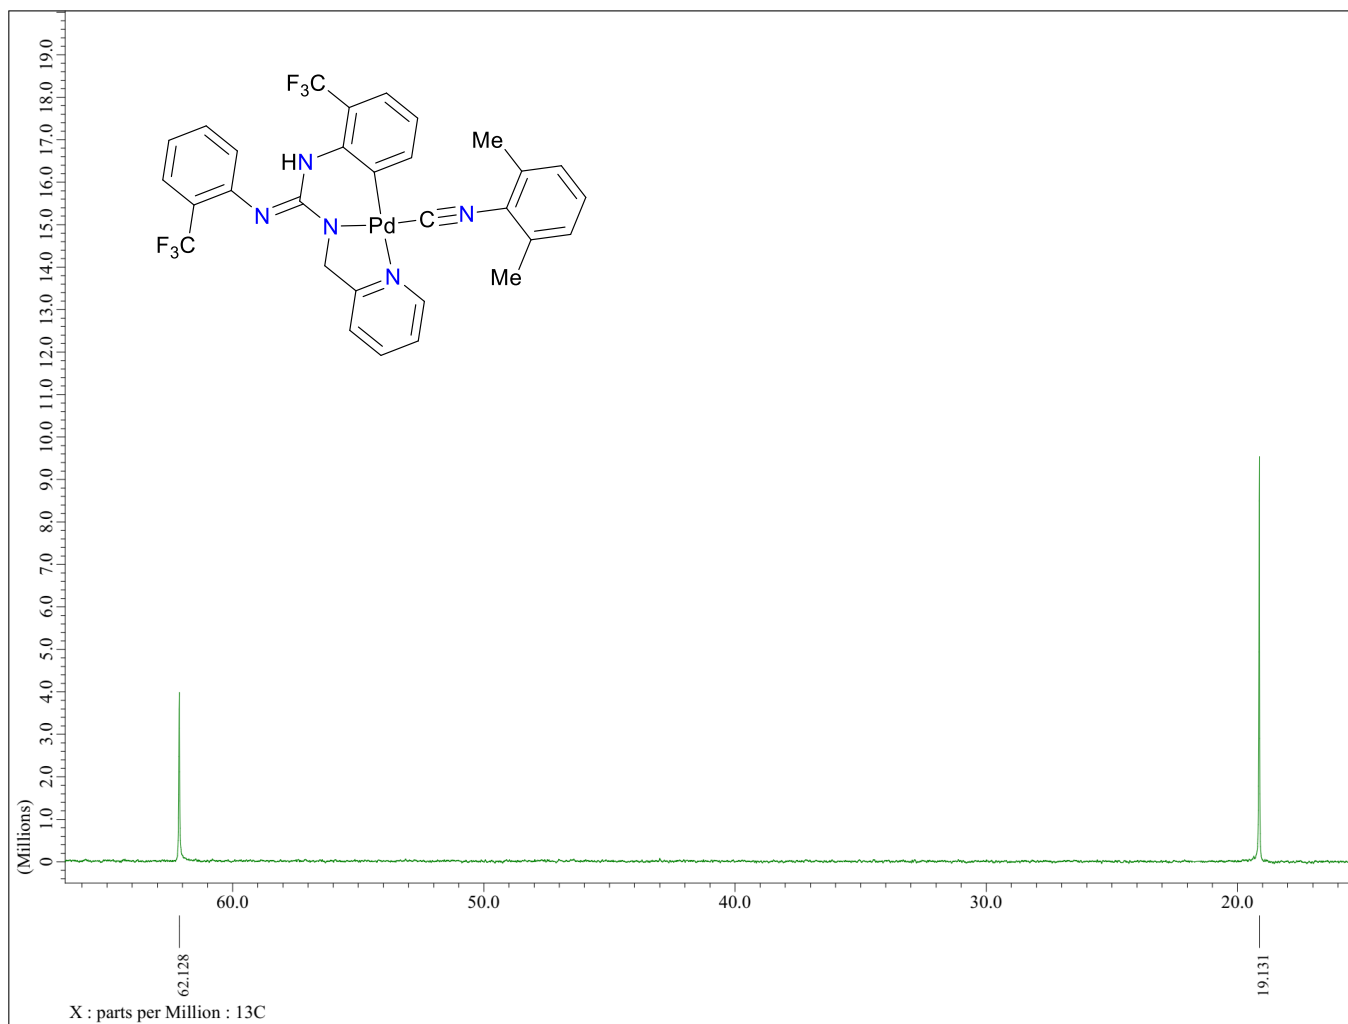

$^{13}\text{C}\{^1\text{H}\}$  NMR ( $\text{CDCl}_3$ , 100.5 MHz) spectrum of **17** in indicated region.

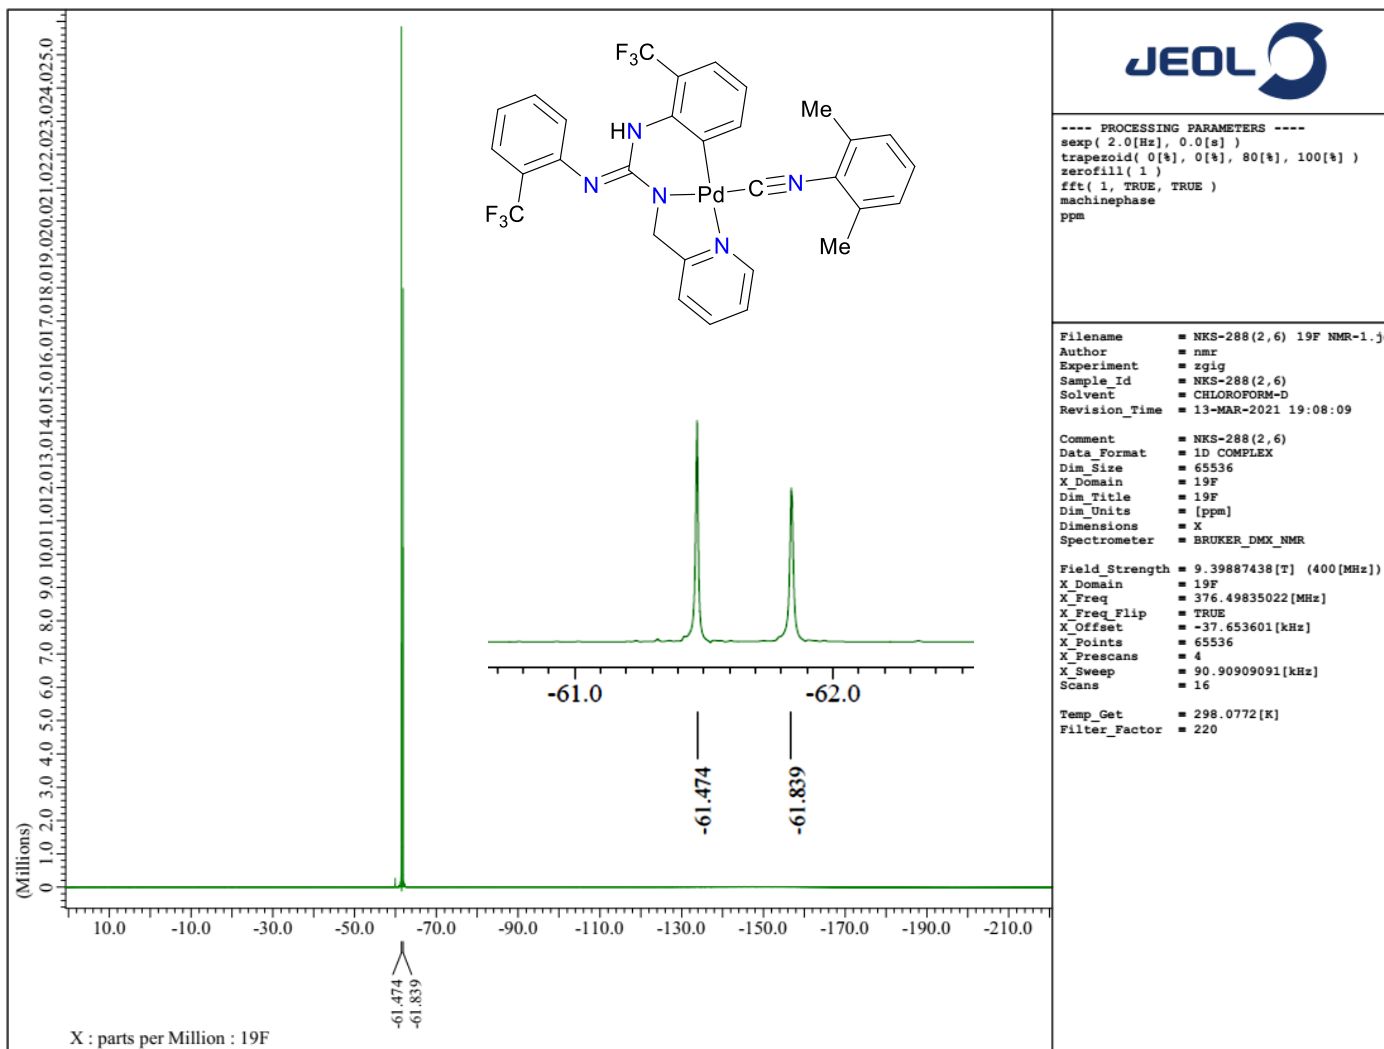

$^{19}\text{F}$  NMR ( $\text{CDCl}_3$ , 376.5 MHz) spectrum of **17**.

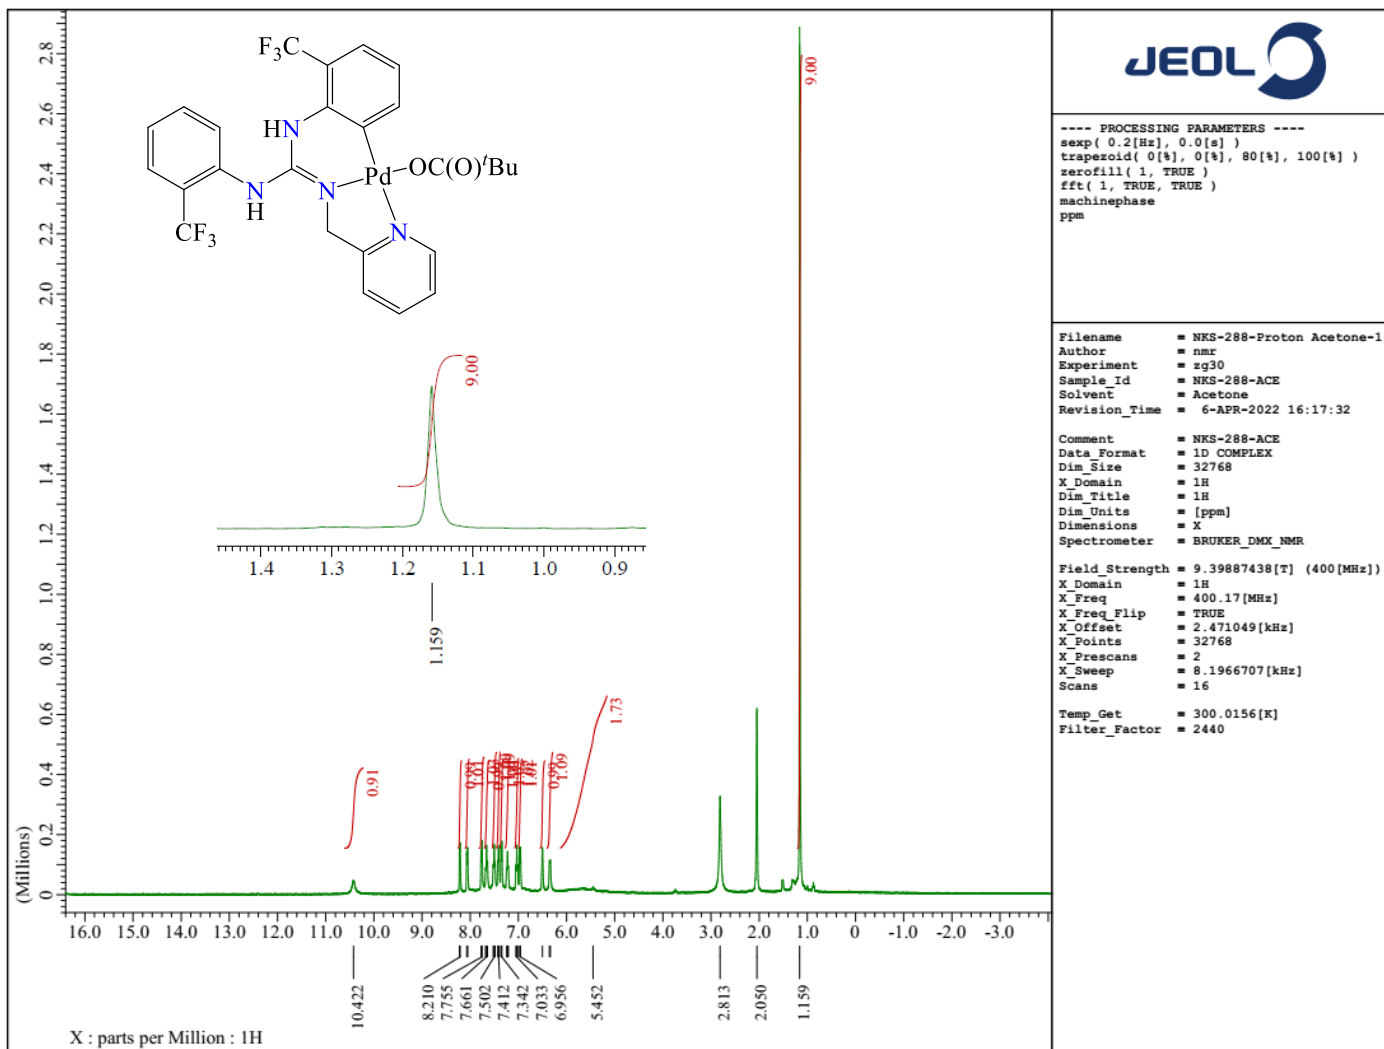

<sup>1</sup>H NMR ((CD<sub>3</sub>)<sub>2</sub>CO, 400 MHz) spectrum of **8**.

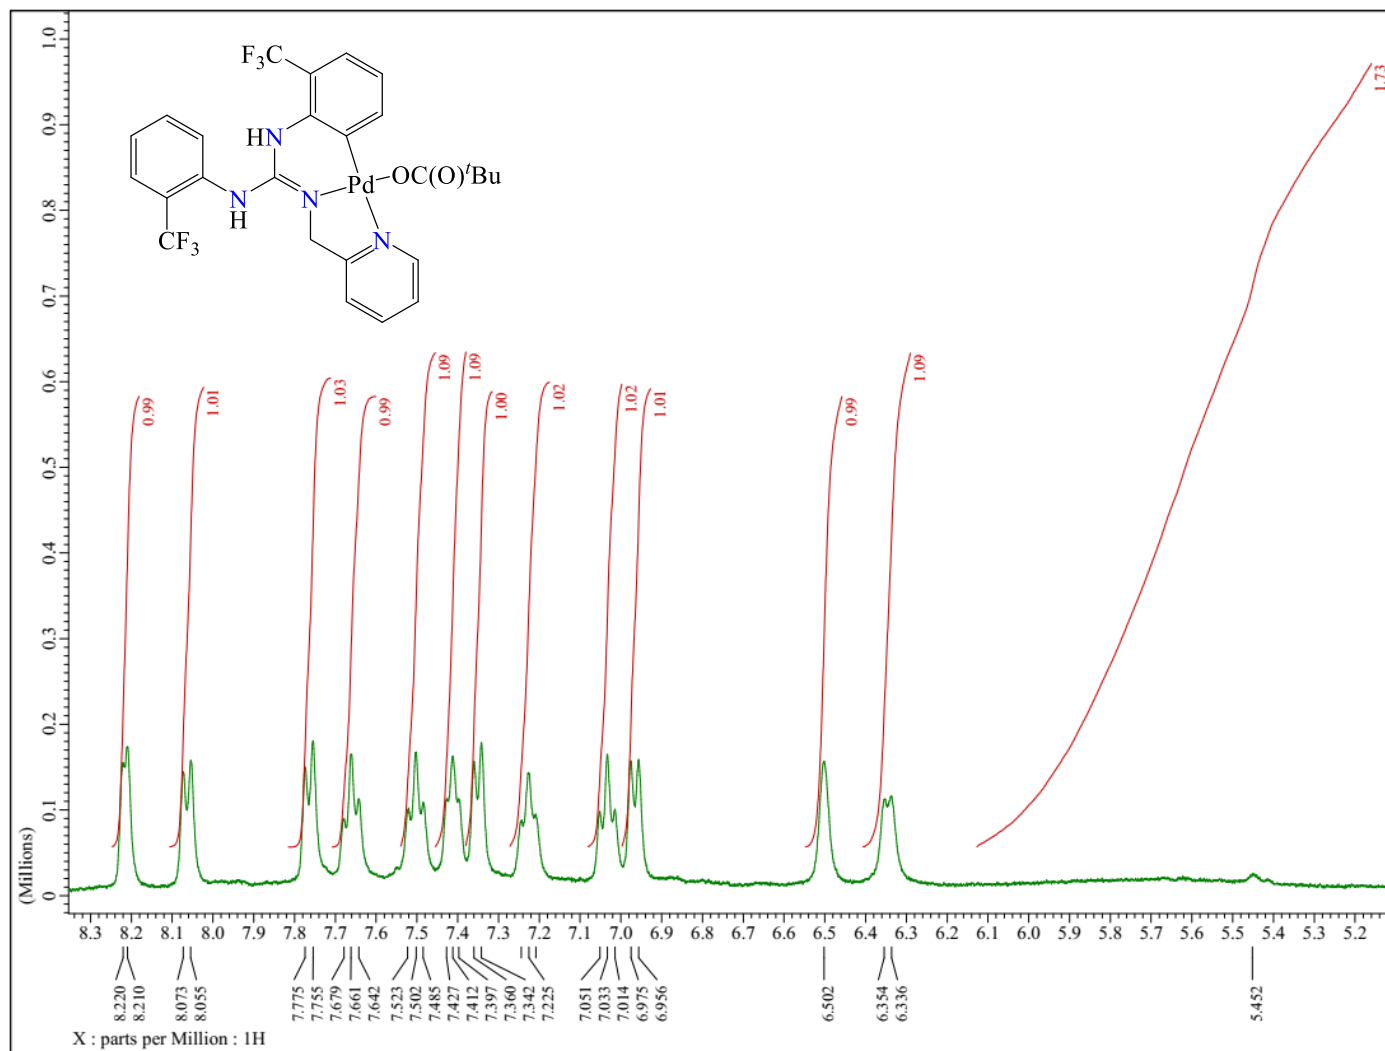

$^1\text{H}$  NMR ( $(\text{CD}_3)_2\text{CO}$ , 400 MHz) spectrum of **8** in indicated region.

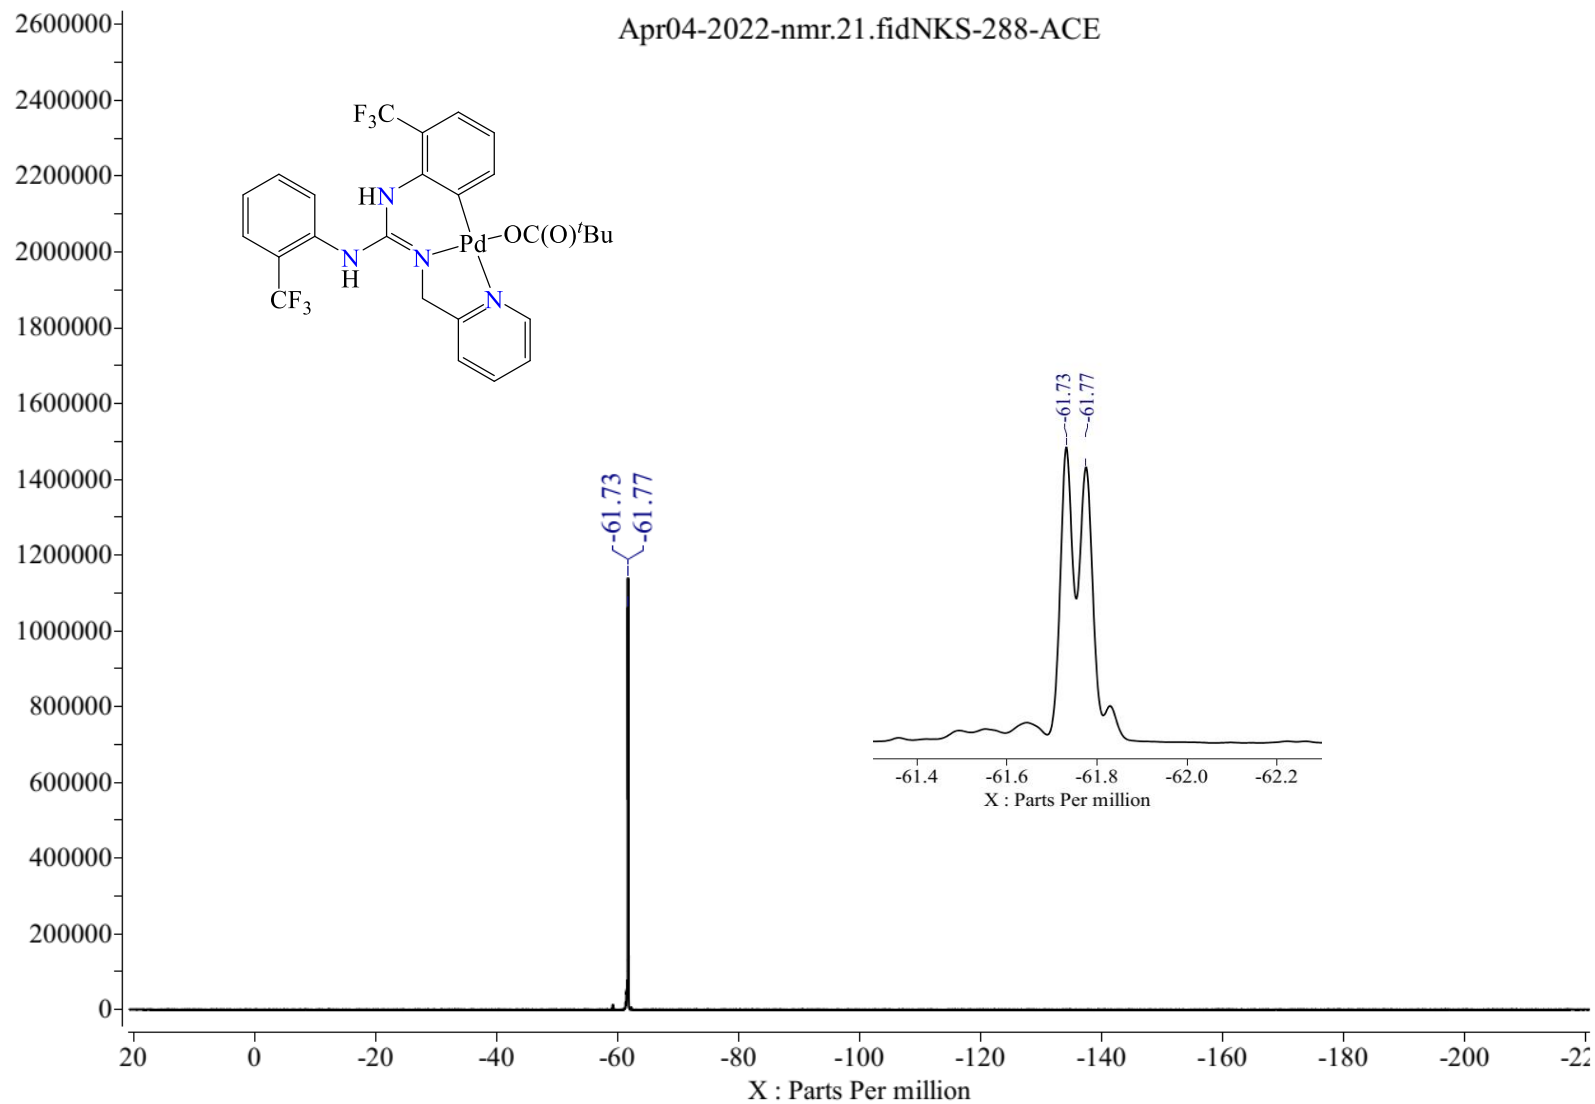

$^{19}\text{F}$  NMR ( $(\text{CD}_3)_2\text{CO}$ , 376.5 MHz) spectrum of **8**.

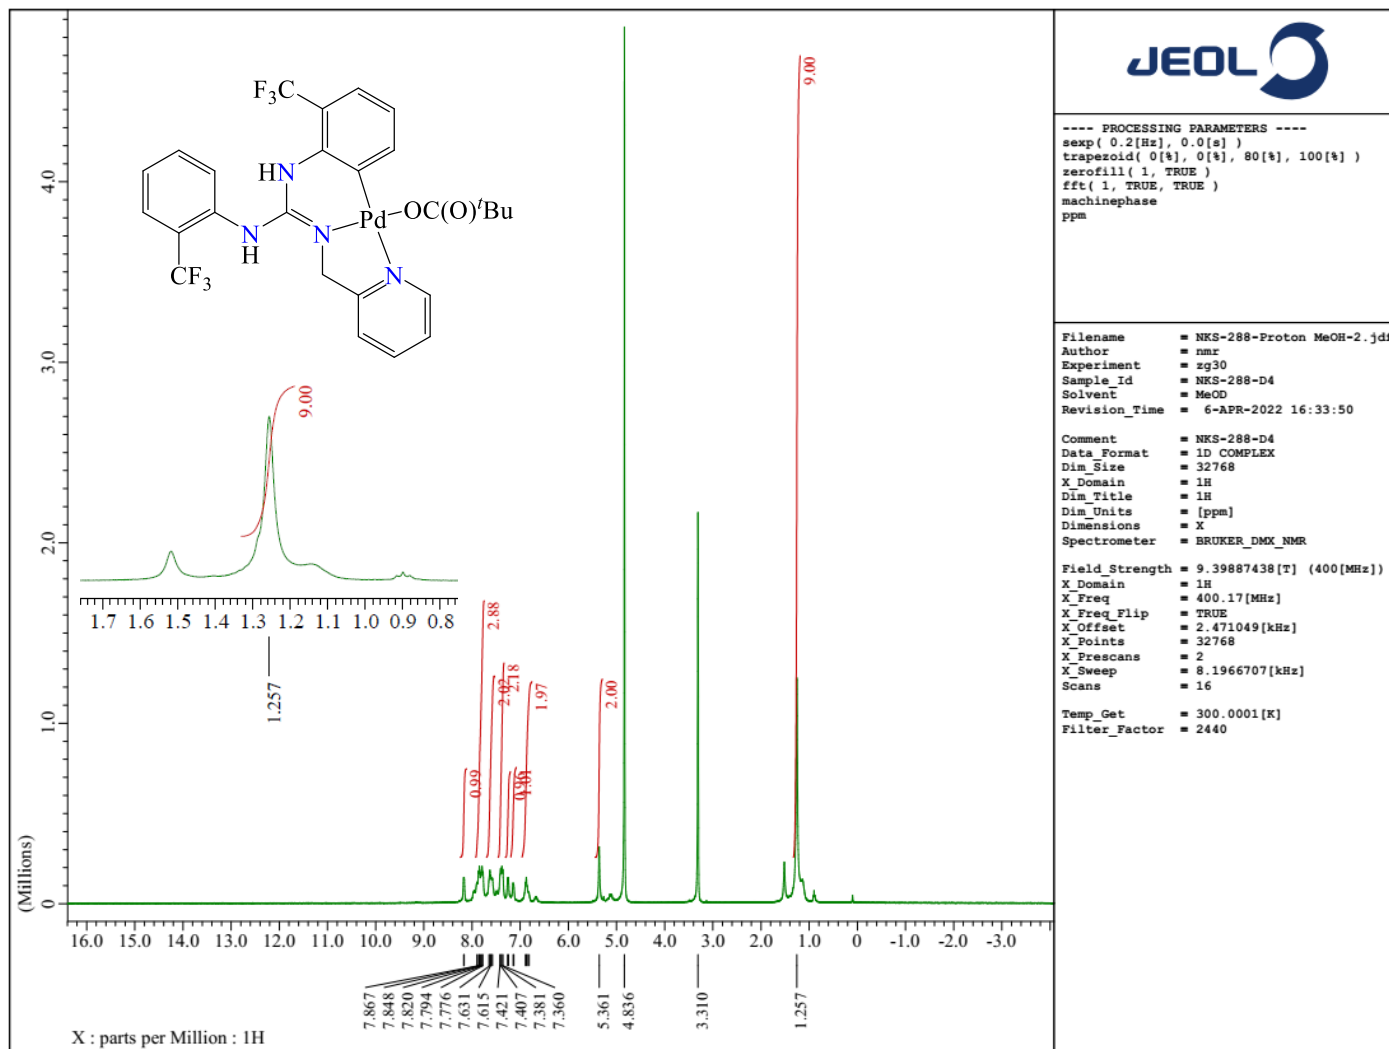

$^1\text{H}$  NMR ( $\text{CD}_3\text{OD}$ , 400 MHz) spectrum of **8**.

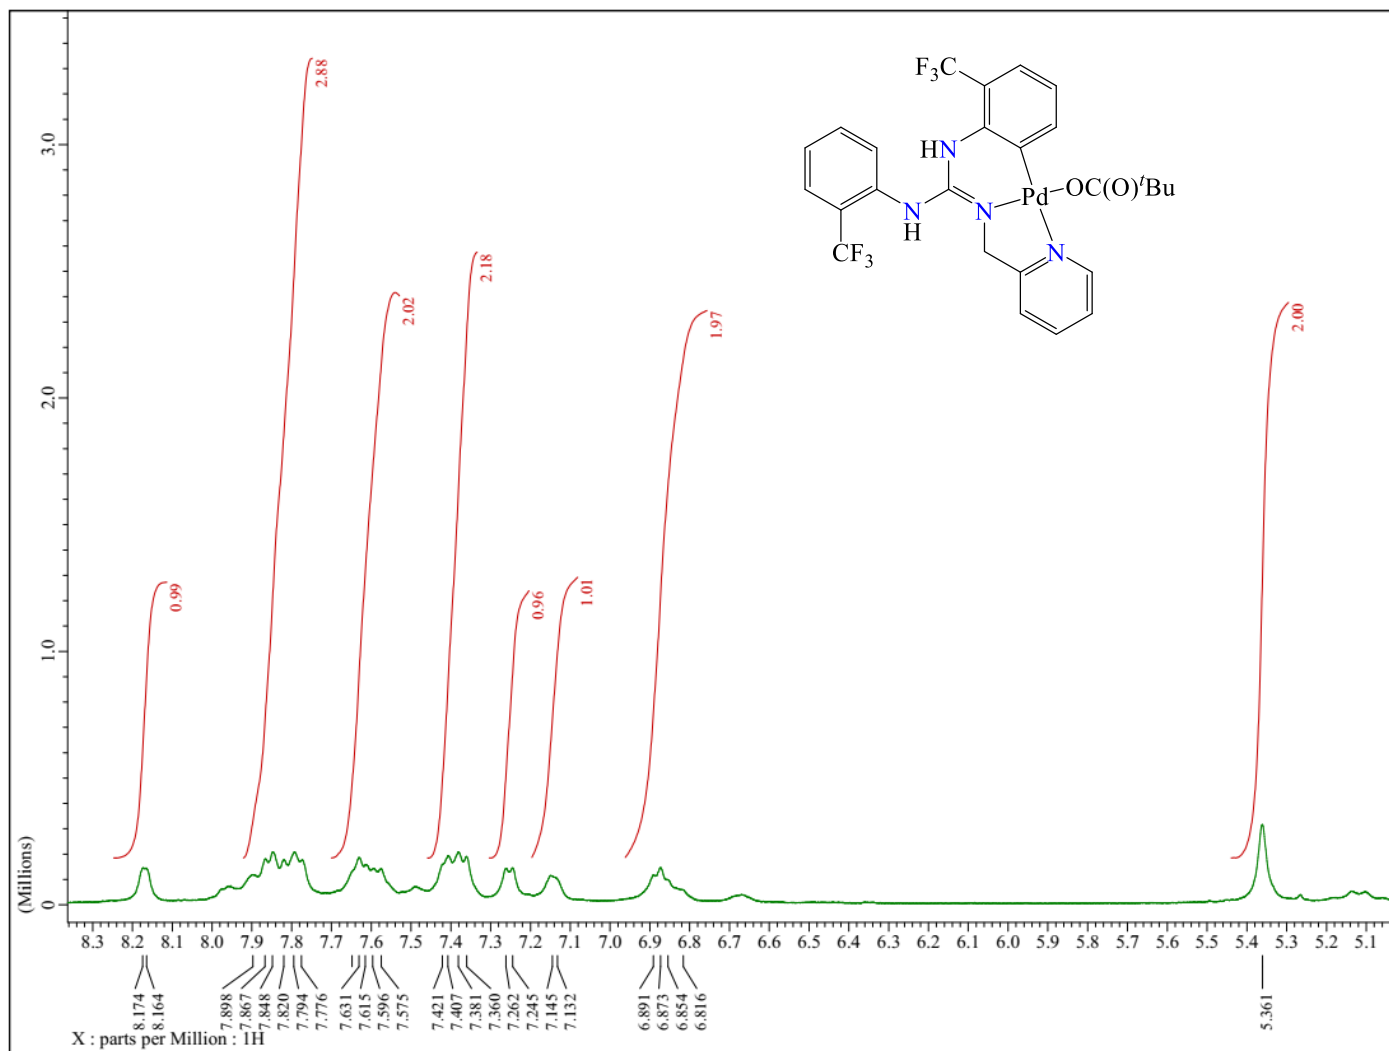

$^1\text{H}$  NMR ( $\text{CD}_3\text{OD}$ , 400 MHz) spectrum of **8** in indicated region.

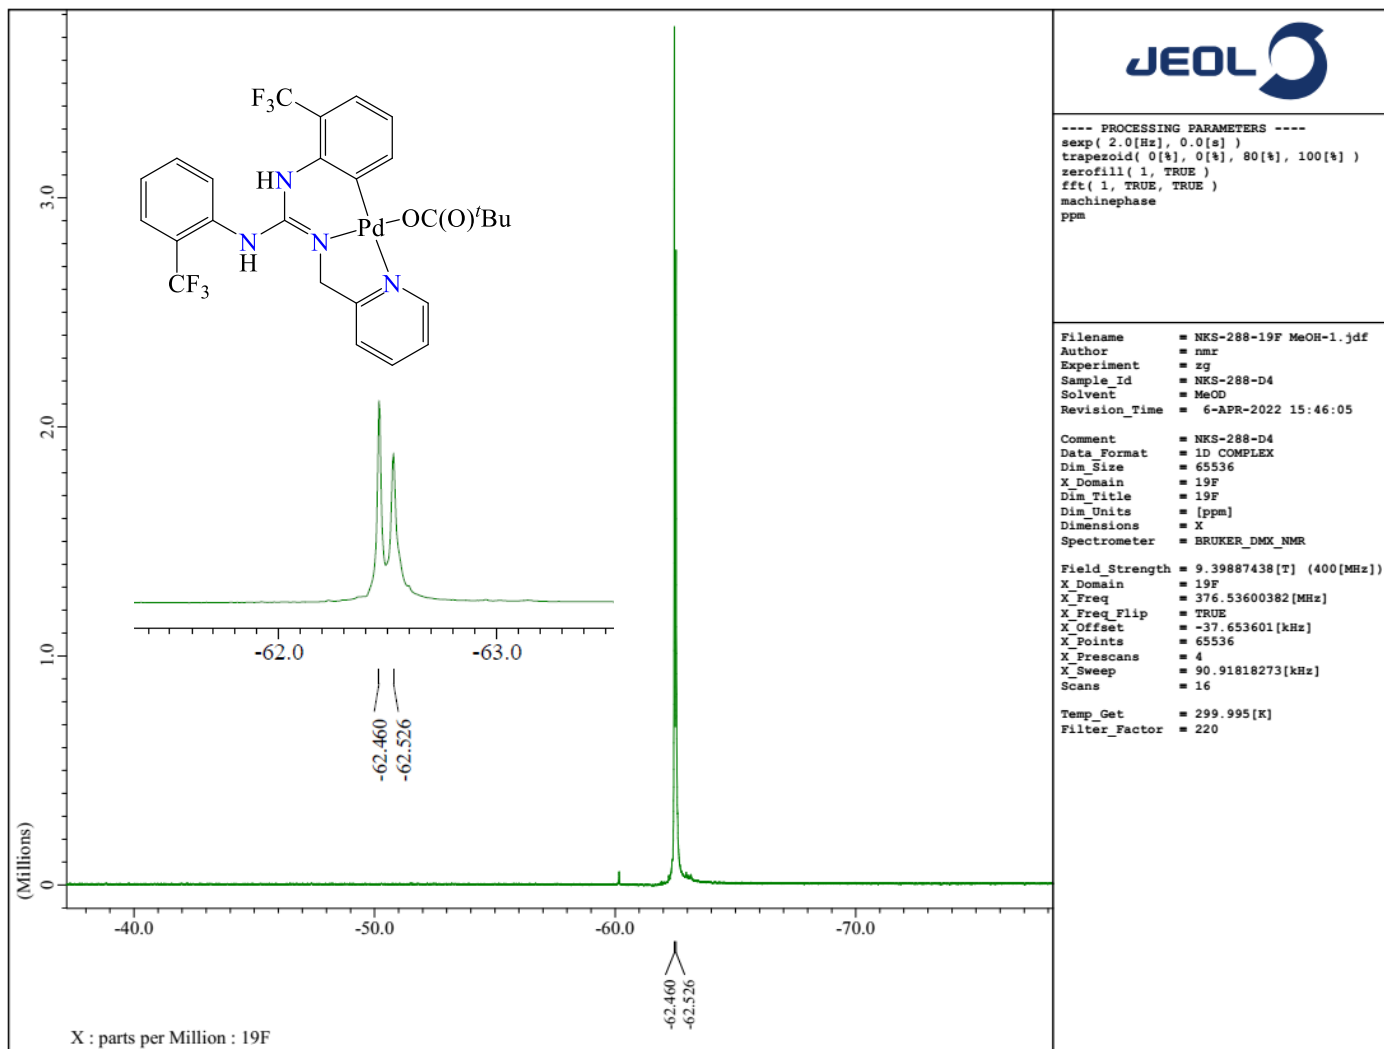

$^{19}\text{F}$  NMR ( $\text{CD}_3\text{OD}$ , 376.5 MHz) spectrum of **8**.



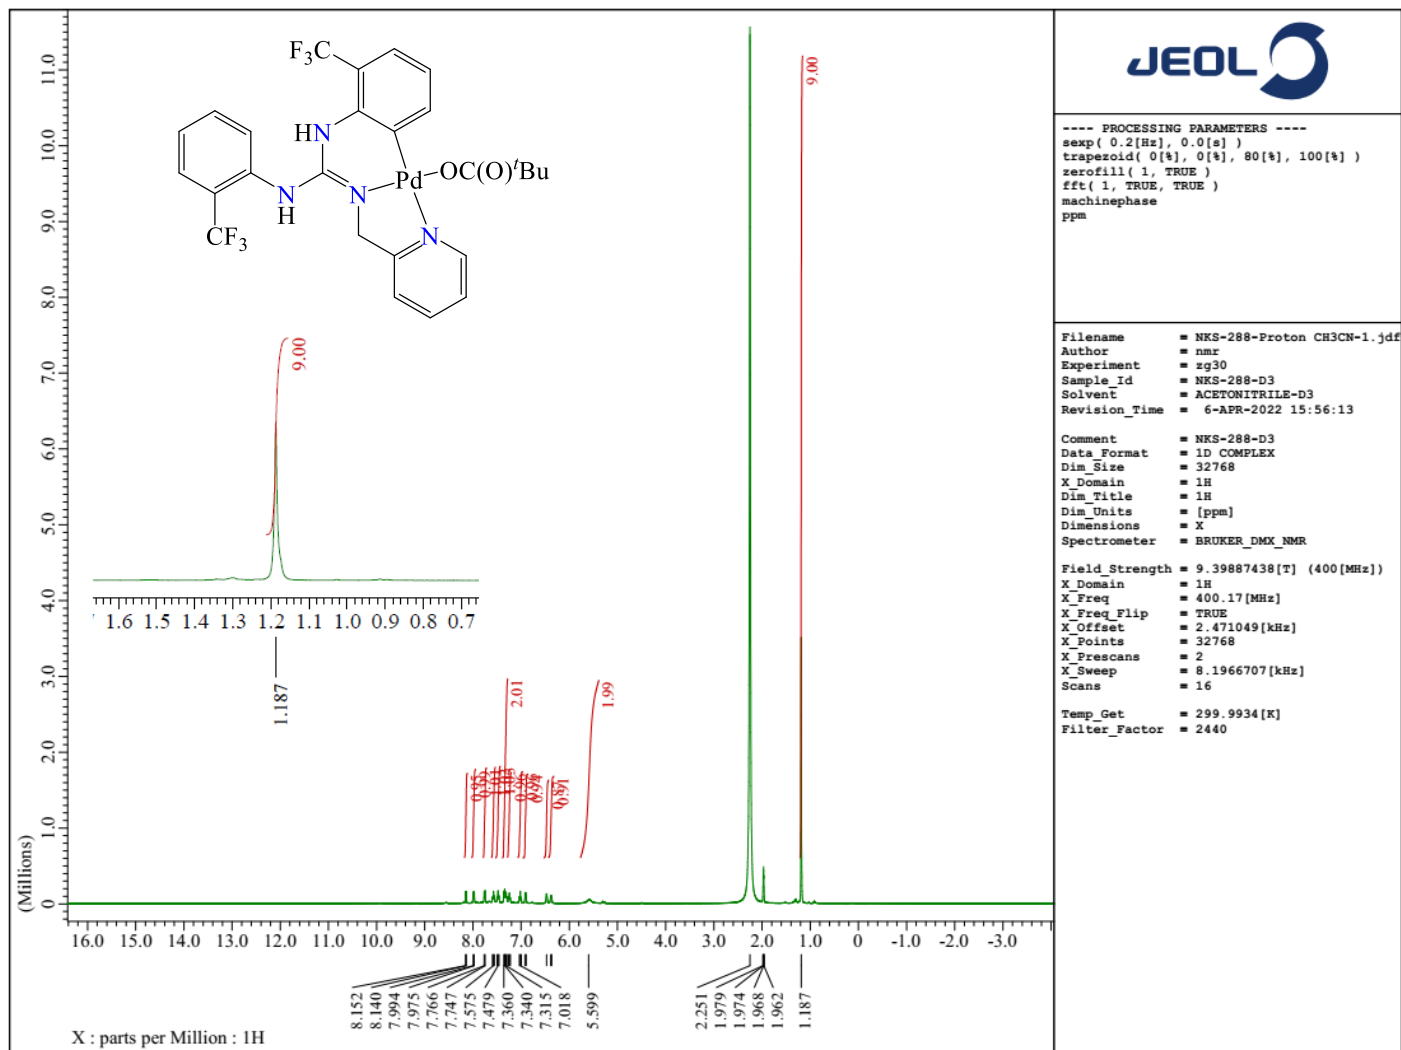

$^1\text{H}$  NMR ( $\text{CD}_3\text{CN}$ , 400 MHz) spectrum of **8**.

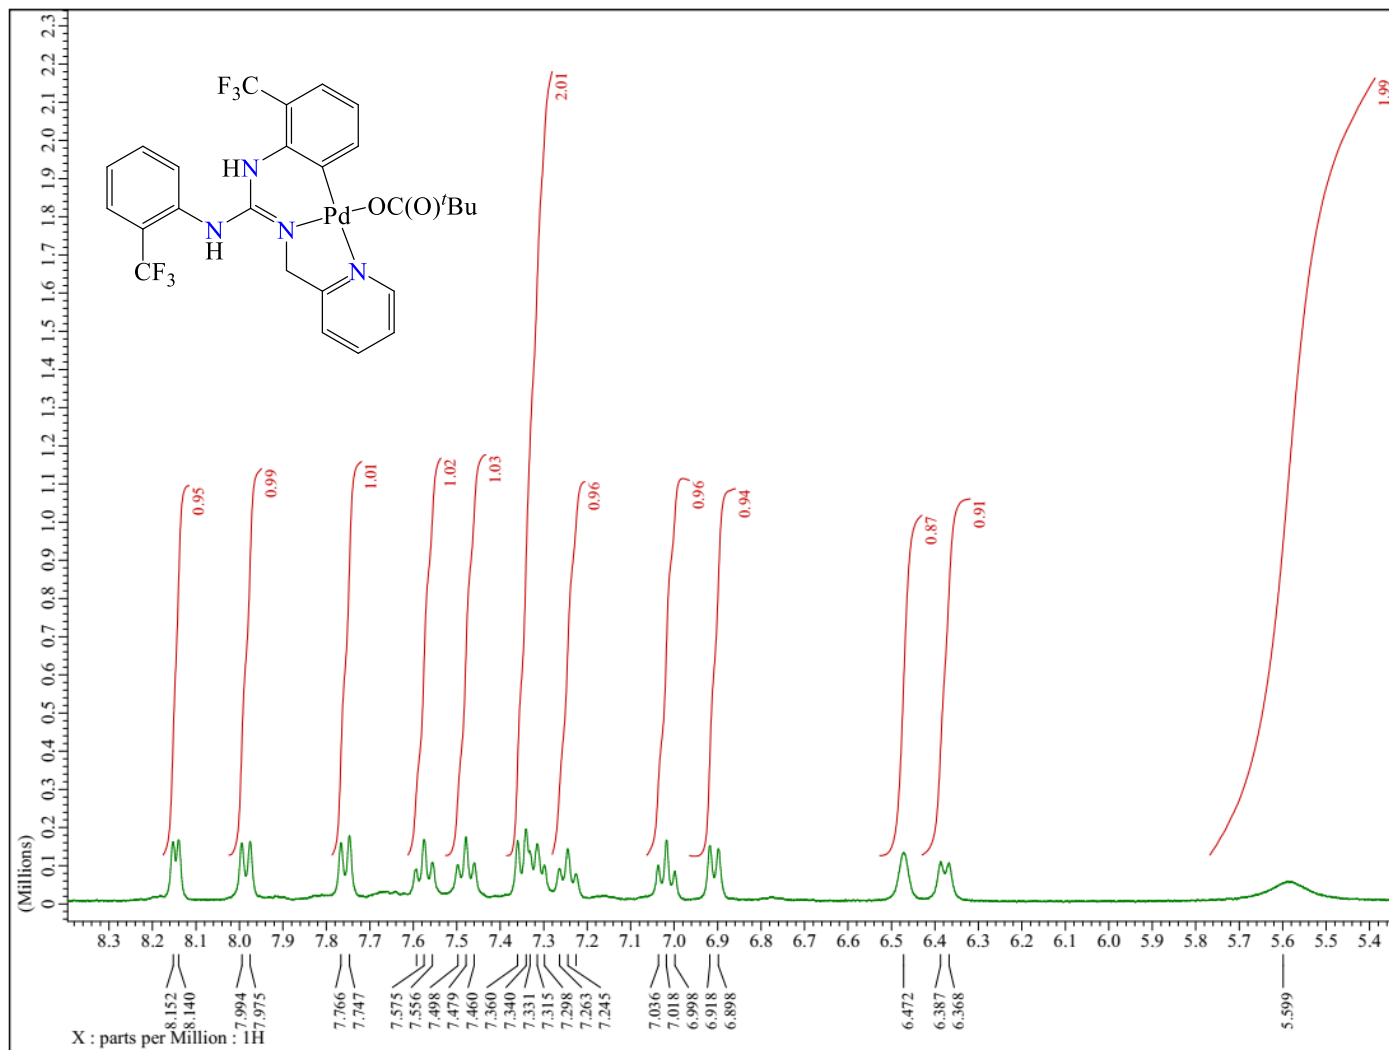

$^1\text{H}$  NMR ( $\text{CD}_3\text{CN}$ , 400 MHz) spectrum of **8** in indicated region.

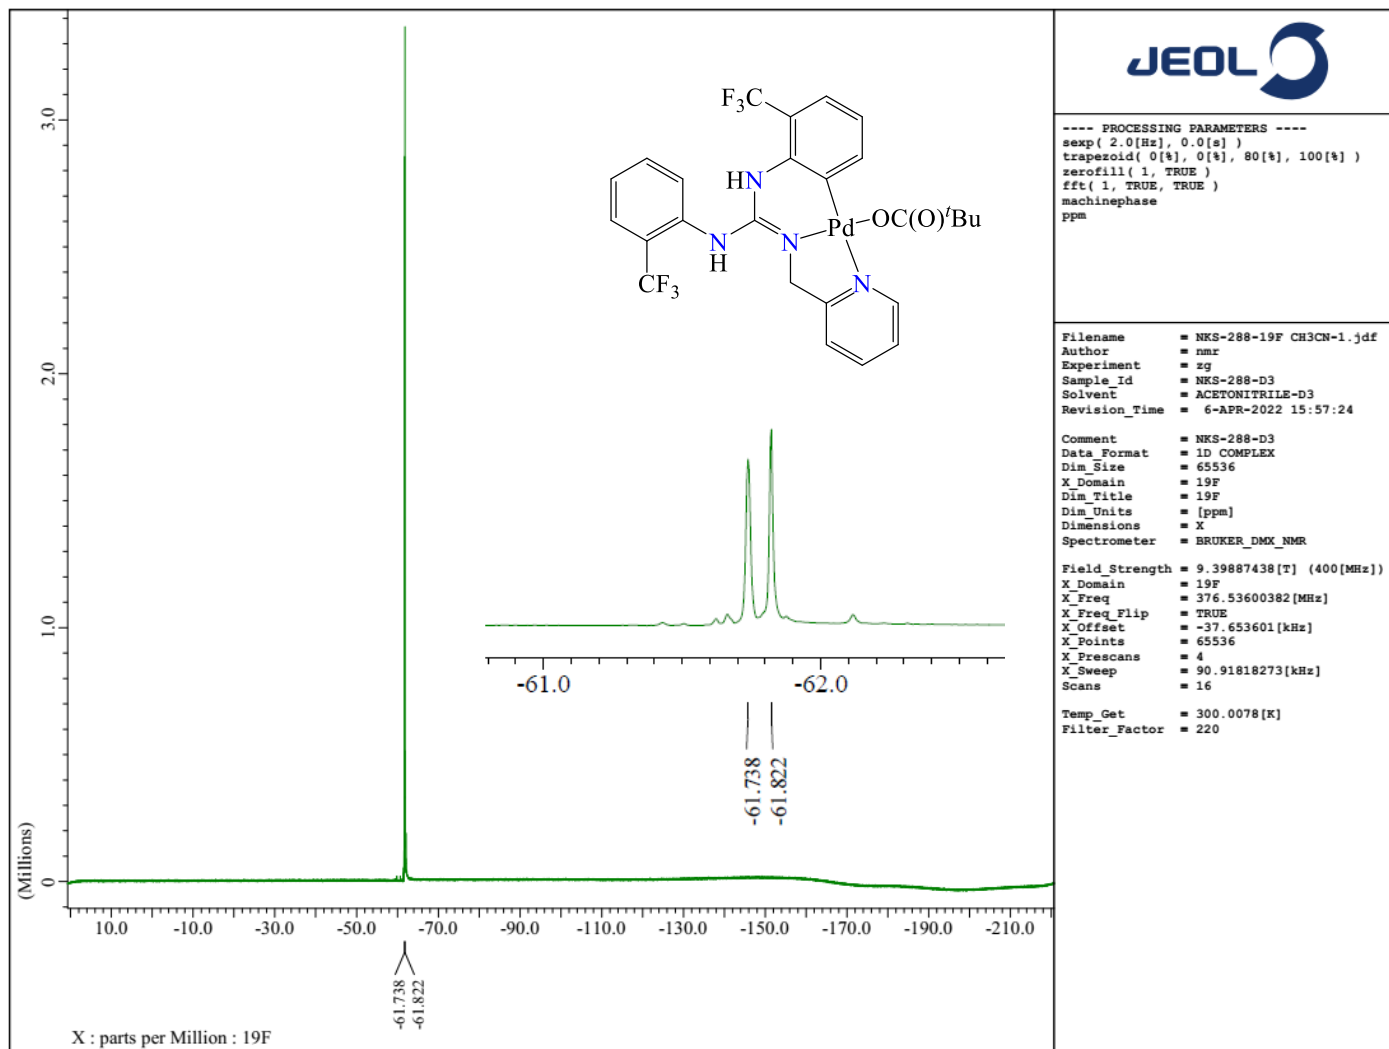

$^{19}\text{F}$  NMR ( $\text{CD}_3\text{CN}$ , 376.5 MHz) spectrum of **8**.

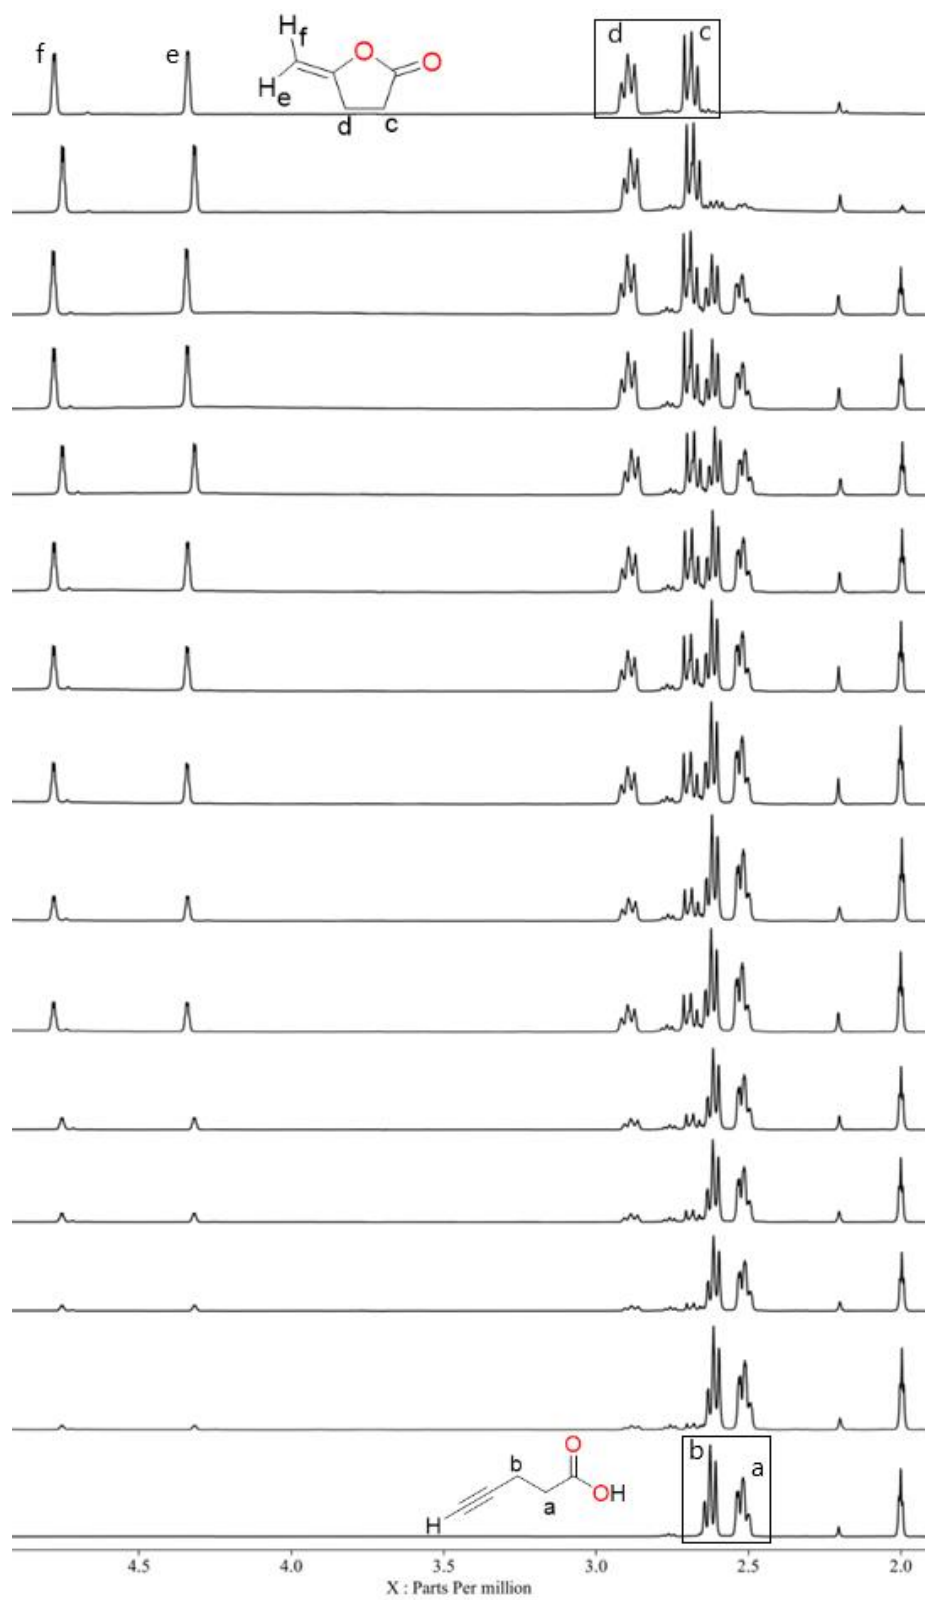

$^1\text{H}$  NMR ( $\text{CDCl}_3$ , 400 MHz) optimization of time for cycloisomerization reaction of 4-pentynoic acid catalyzed by **8**.

|                      |           |                    |           |                        |              |                               |                     |
|----------------------|-----------|--------------------|-----------|------------------------|--------------|-------------------------------|---------------------|
| <b>Sample Name</b>   | NKS-216   | <b>Position</b>    | P1-B1     | <b>Instrument Name</b> | Instrument 1 | <b>User Name</b>              |                     |
| <b>Inj Vol</b>       | 1         | <b>InjPosition</b> |           | <b>SampleType</b>      | Sample       | <b>IRM Calibration Status</b> | Success             |
| <b>Data Filename</b> | NKS-216.d | <b>ACQ Method</b>  | Damo JK.m | <b>Comment</b>         |              | <b>Acquired Time</b>          | 26-12-2018 12:32:40 |

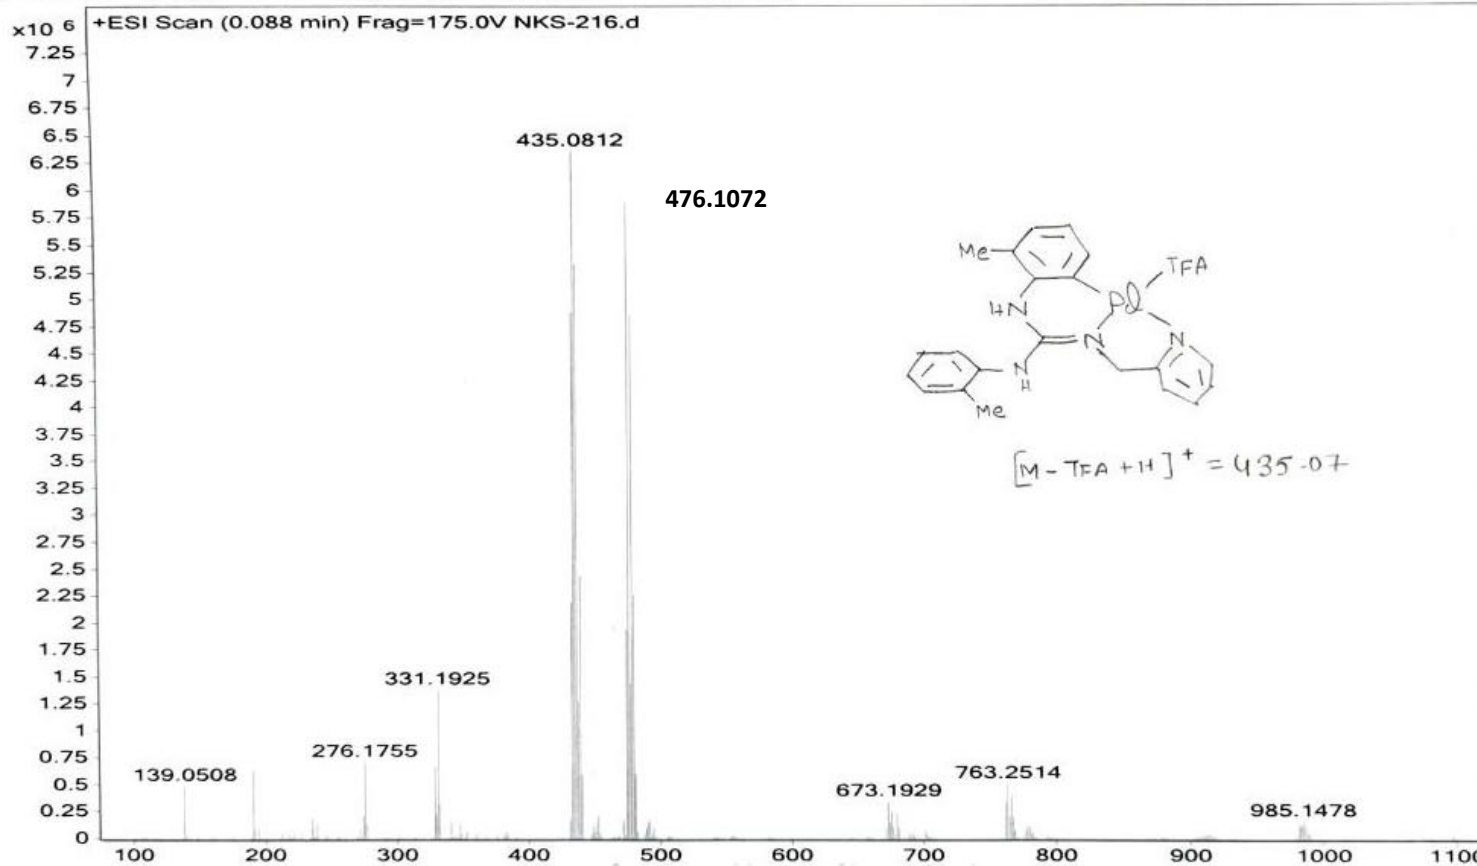

ESI-MS data of 3.

|                      |           |                    |           |                        |              |                               |                     |
|----------------------|-----------|--------------------|-----------|------------------------|--------------|-------------------------------|---------------------|
| <b>Sample Name</b>   | NKS-215   | <b>Position</b>    | P1-C7     | <b>Instrument Name</b> | Instrument 1 | <b>User Name</b>              |                     |
| <b>Inj Vol</b>       | 3         | <b>InjPosition</b> |           | <b>SampleType</b>      | Sample       | <b>IRM Calibration Status</b> | Success             |
| <b>Data Filename</b> | NKS-215.d | <b>ACQ Method</b>  | Damo JK.m | <b>Comment</b>         |              | <b>Acquired Time</b>          | 28-12-2018 16:49:29 |

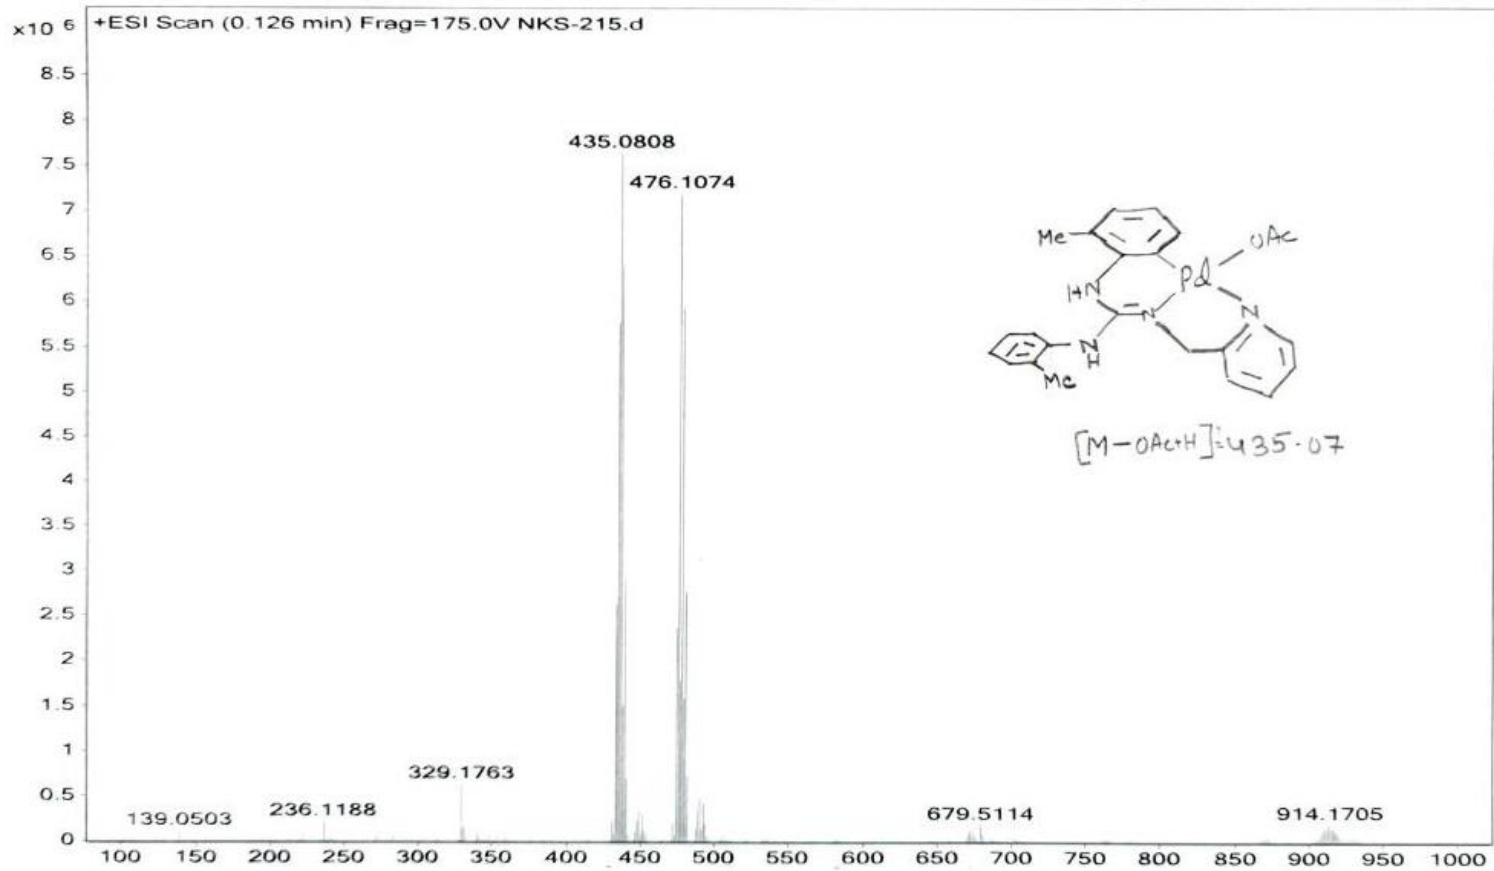

ESI-MS data of 4.

|                      |           |                    |           |                        |              |                               |                     |
|----------------------|-----------|--------------------|-----------|------------------------|--------------|-------------------------------|---------------------|
| <b>Sample Name</b>   | NKS-285   | <b>Position</b>    | P1-B9     | <b>Instrument Name</b> | Instrument 1 | <b>User Name</b>              |                     |
| <b>Inj Vol</b>       | 1         | <b>InjPosition</b> |           | <b>SampleType</b>      | Sample       | <b>IRM Calibration Status</b> | Success             |
| <b>Data Filename</b> | NKS-285.d | <b>ACQ Method</b>  | Damo JK.m | <b>Comment</b>         |              | <b>Acquired Time</b>          | 27-06-2019 11:56:51 |

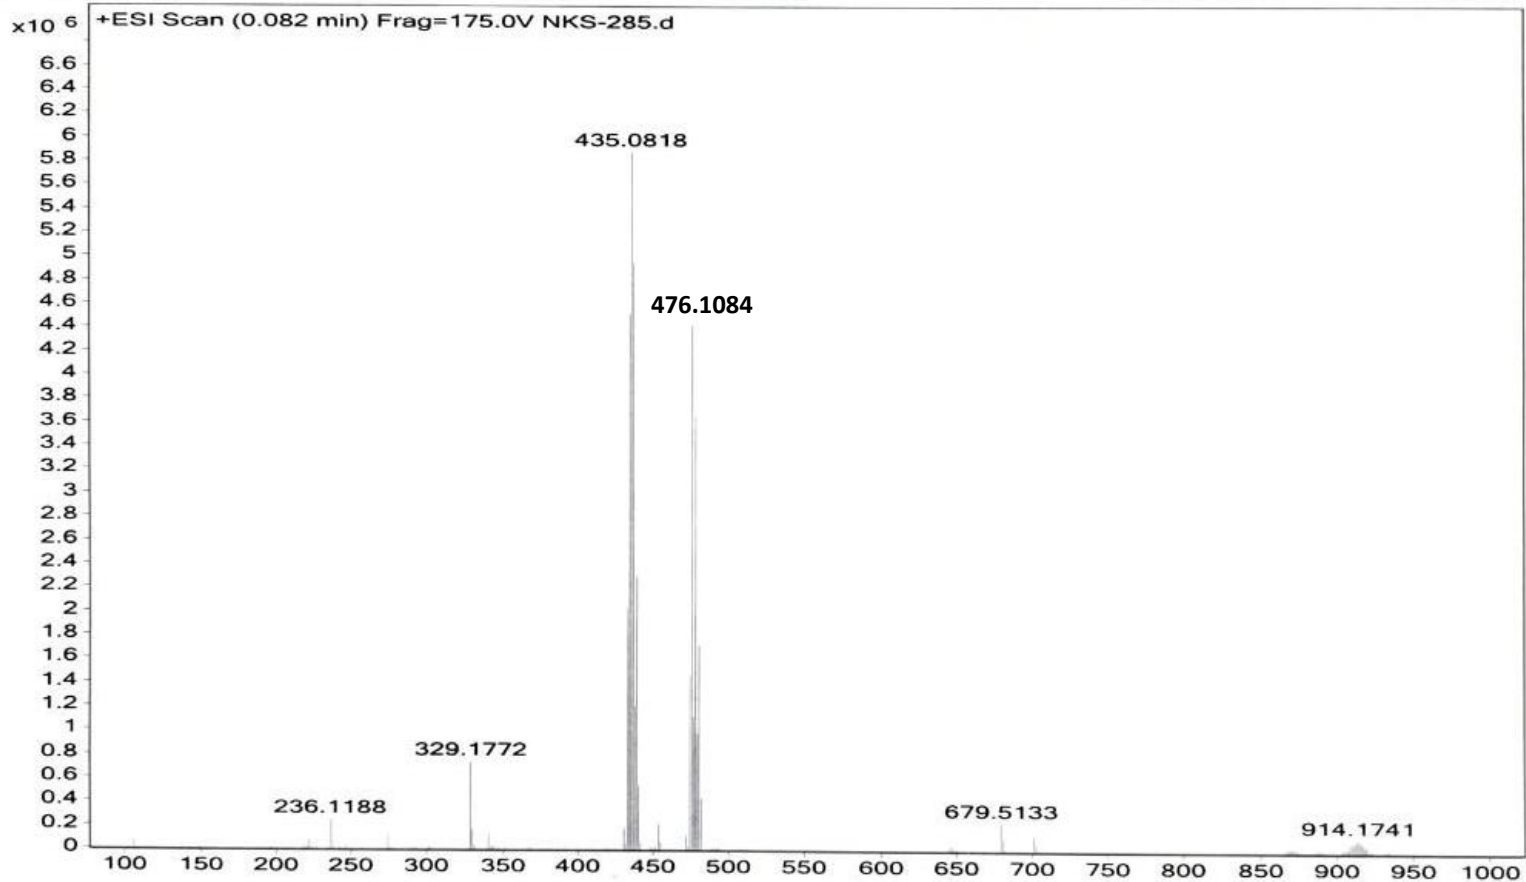

ESI-MS data of 5.

|                      |           |                    |           |                        |              |                               |                  |
|----------------------|-----------|--------------------|-----------|------------------------|--------------|-------------------------------|------------------|
| <b>Sample Name</b>   | NKS-220   | <b>Position</b>    | P1-C8     | <b>Instrument Name</b> | Instrument 1 | <b>User Name</b>              |                  |
| <b>Inj Vol</b>       | 3         | <b>InjPosition</b> |           | <b>SampleType</b>      | Sample       | <b>IRM Calibration Status</b> | Success          |
| <b>Data Filename</b> | NKS-220.d | <b>ACQ Method</b>  | Damo JK.m | <b>Comment</b>         |              | <b>Acquired Time</b>          | 28-12-2018 16:51 |

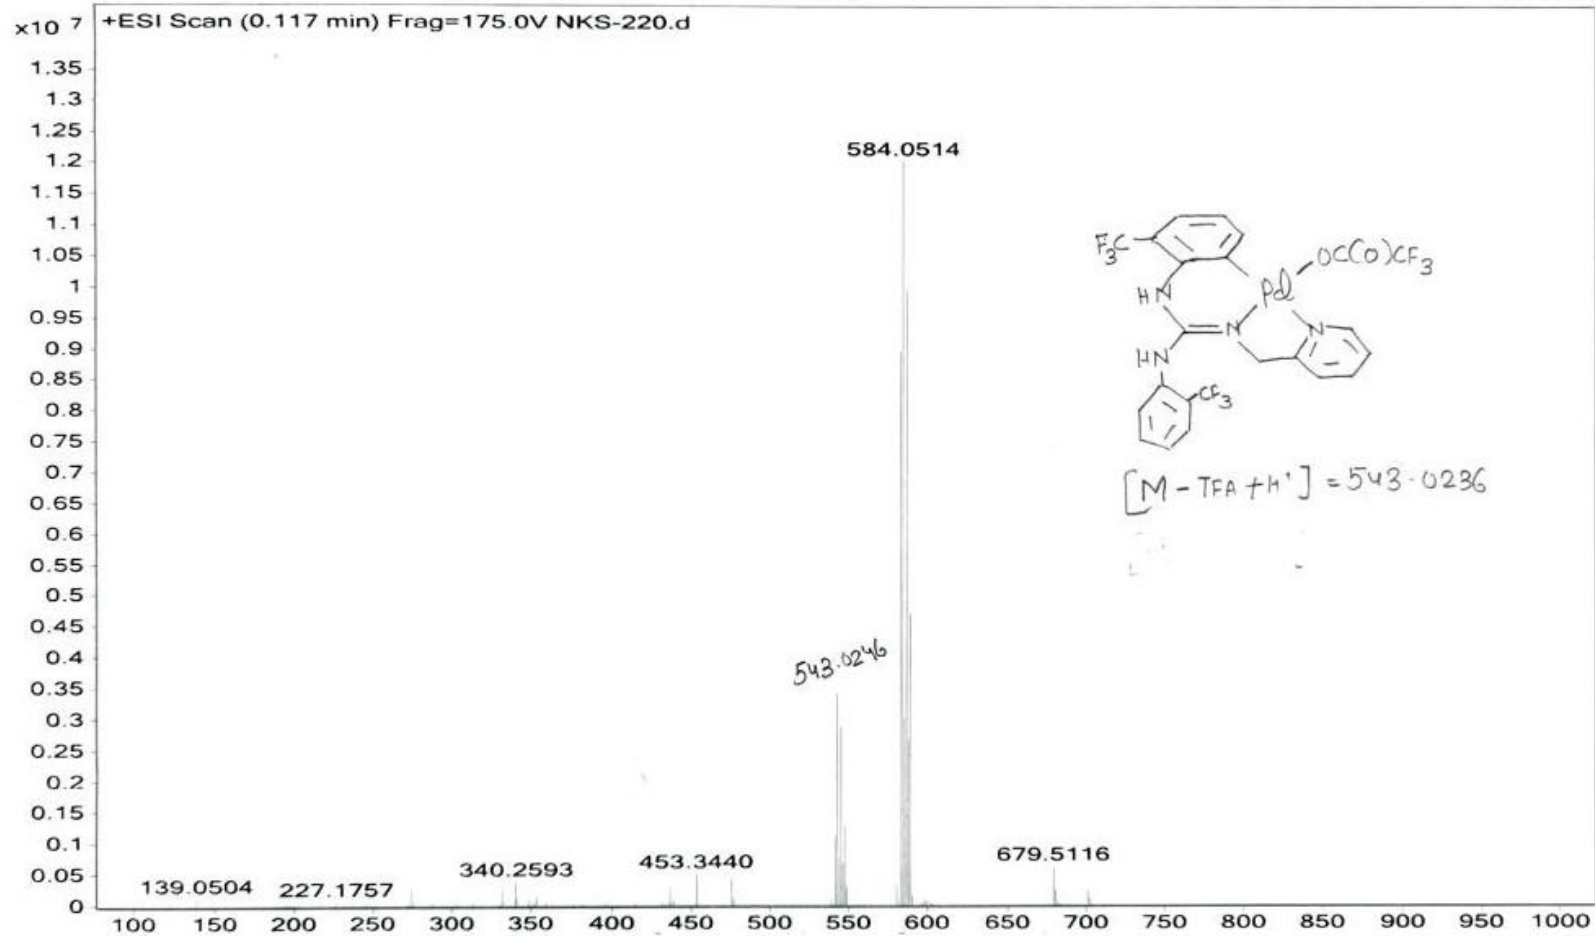

ESI-MS data of 6.



|                      |           |                    |           |                        |              |                               |                     |
|----------------------|-----------|--------------------|-----------|------------------------|--------------|-------------------------------|---------------------|
| <b>Sample Name</b>   | NKS-230   | <b>Position</b>    | P1-E3     | <b>Instrument Name</b> | Instrument 1 | <b>User Name</b>              |                     |
| <b>Inj Vol</b>       | 1         | <b>InjPosition</b> |           | <b>SampleType</b>      | Sample       | <b>IRM Calibration Status</b> | Success             |
| <b>Data Filename</b> | NKS-230.d | <b>ACQ Method</b>  | Damo JK.m | <b>Comment</b>         |              | <b>Acquired Time</b>          | 07-01-2019 12:57:50 |

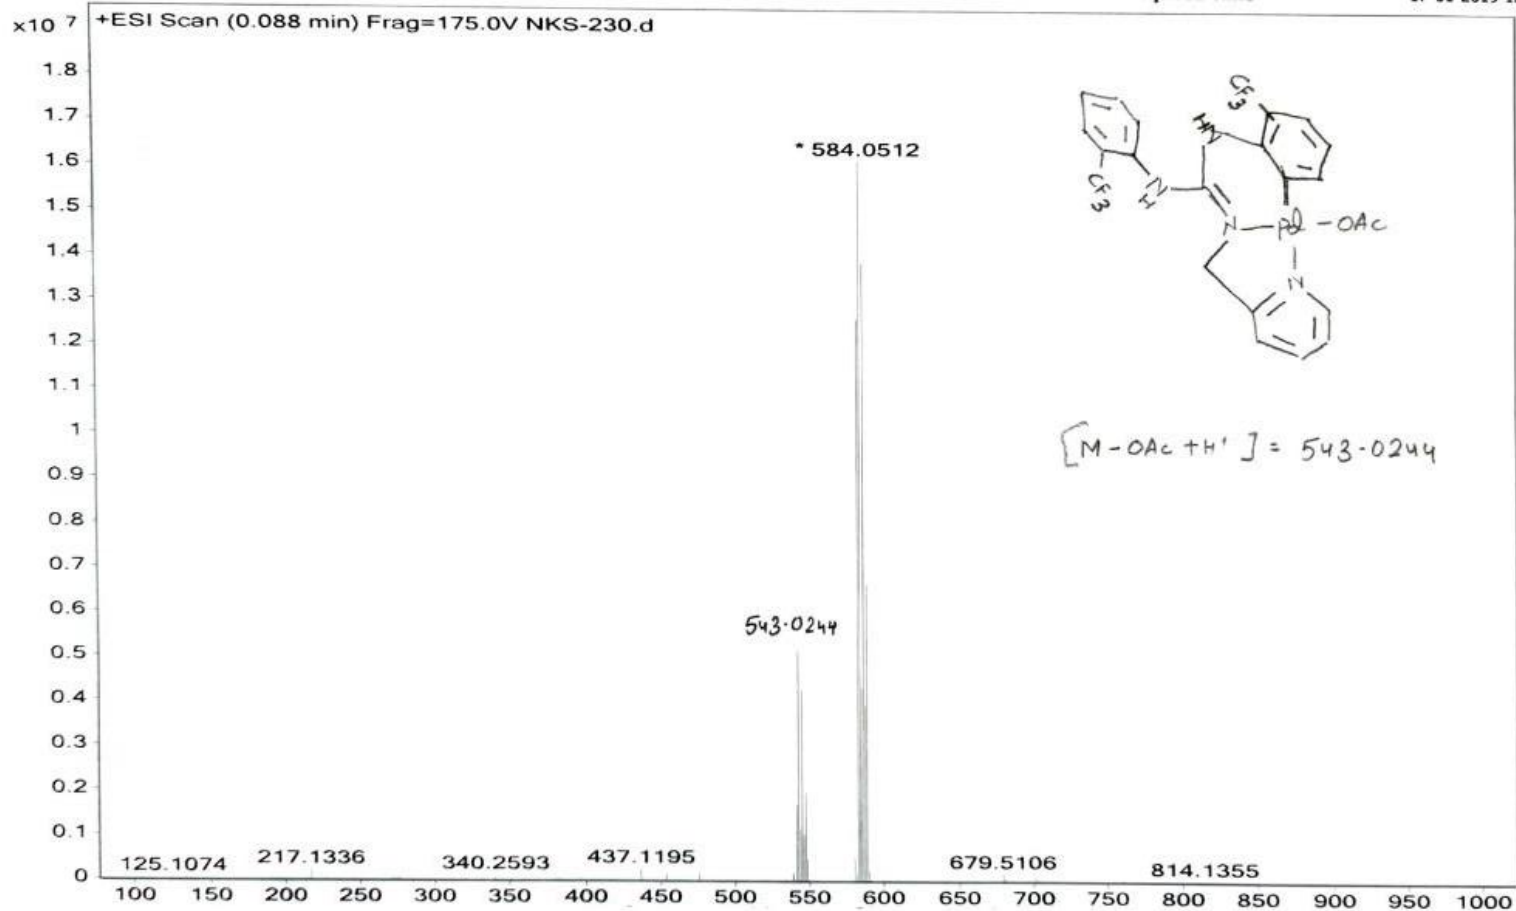

ESI-MS data of 7 + 9.

| Sample Name   | Position    | Instrument Name | User Name              |
|---------------|-------------|-----------------|------------------------|
| NKS-288       | P1-B8       | Instrument 1    |                        |
| Inj Vol       | InjPosition | SampleType      | IRM Calibration Status |
| 1             |             | Sample          | Success                |
| Data Filename | ACQ Method  | Comment         | Acquired Time          |
| NKS-288.d     | Damo JK.m   |                 | 22-07-2019 13:31:00    |

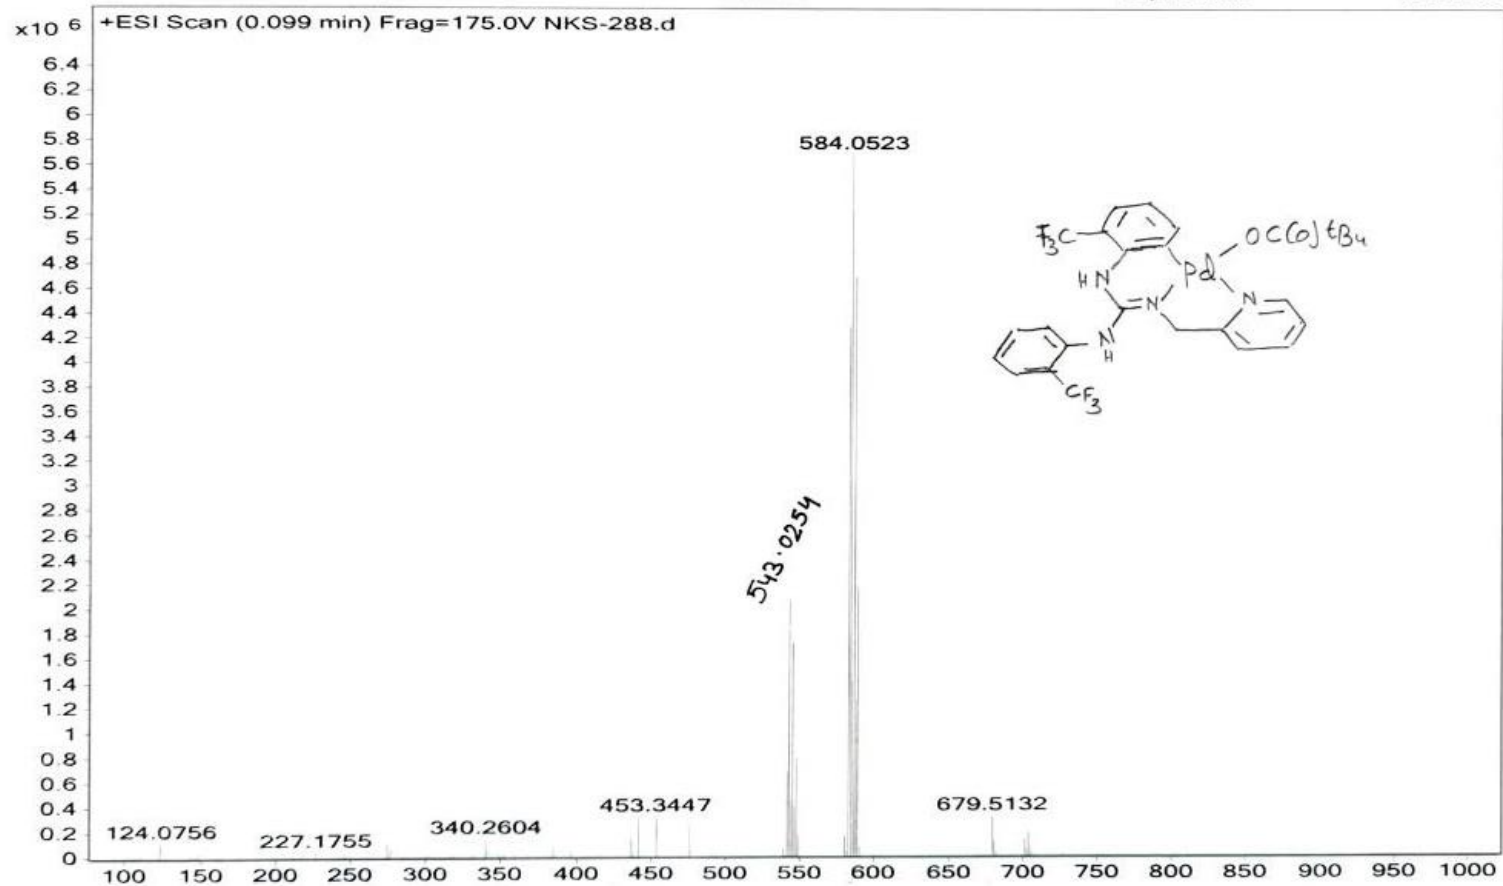

ESI-MS data of **8**.

20-05-2019  
 varioELcube  
 serial number: 19171021

Text report

| No. | Weight [mg] | Name         | Method | N [g] | C [g] | H [g] | S [g]  | N Area | C Area  | H Area | S Area  | C/N ratio | C/H ratio | N Factor | C Factor | H Factor | S Factor | N Blank | C Blank | H Blank | S Blank | Moisture [g] | Prot. factor | Prot. [g] | Memo | Date       | Time  |
|-----|-------------|--------------|--------|-------|-------|-------|--------|--------|---------|--------|---------|-----------|-----------|----------|----------|----------|----------|---------|---------|---------|---------|--------------|--------------|-----------|------|------------|-------|
| 13  | 5.0960      | sulfarbamide | Smg90s | 16.26 | 41.85 | 4.680 | 18.620 | 21.586 | 55.838  | 19.915 | 401.469 | 2.5738    | 8.9423    | 1.0760   | 1.0826   | 1.1455   | 1.0560   | 0       | 0       | 0       | 0       | 0.00         | 0.0000       | 0.000     |      | 20.05.2019 | 18.04 |
| 14  | 5.8540      | sulfarbamide | Smg90s | 16.26 | 41.85 | 4.680 | 18.620 | 36.241 | 64.087  | 22.858 | 694.479 | 2.5738    | 8.9423    | 1.0770   | 1.0820   | 1.1561   | 1.0555   | 0       | 0       | 0       | 0       | 0.00         | 0.0000       | 0.000     |      | 20.05.2019 | 18.17 |
| 22  | 5.2300      | NKS-35       | Smg90s | 5.83  | 37.88 | 2.630 | 4.609  | 11.638 | 51.982  | 10.816 | 145.781 | 6.5024    | 14.4004   | 1.0754   | 1.0811   | 1.2018   | 1.0583   | 0       | 0       | 0       | 0       | 0.00         | 0.0000       | 0.000     |      | 20.05.2019 | 19.49 |
| 23  | 3.5880      | NKS-36       | Smg90s | 12.29 | 66.27 | 4.024 | 0.142  | 16.844 | 62.261  | 11.403 | 2.764   | 5.3919    | 16.4679   | 1.0754   | 1.0811   | 1.2018   | 1.0583   | 0       | 0       | 0       | 0       | 0.00         | 0.0000       | 0.000     |      | 20.05.2019 | 20.00 |
| 24  | 7.3880      | NKS-36A      | Smg90s | 12.17 | 66.31 | 3.979 | 0.143  | 34.278 | 127.158 | 23.625 | 5.736   | 5.4488    | 16.6662   | 1.0754   | 1.0811   | 1.2018   | 1.0583   | 0       | 0       | 0       | 0       | 0.00         | 0.0000       | 0.000     |      | 20.05.2019 | 20.12 |
| 25  | 3.9150      | NKS-216      | Smg90s | 10.19 | 50.18 | 3.705 | 0.091  | 15.241 | 51.550  | 11.461 | 1.933   | 4.9233    | 13.5419   | 1.0754   | 1.0811   | 1.2018   | 1.0583   | 0       | 0       | 0       | 0       | 0.00         | 0.0000       | 0.000     |      | 20.05.2019 | 20.23 |
| 26  | 4.8580      | NKS-216A     | Smg90s | 10.14 | 50.19 | 3.690 | 0.071  | 18.813 | 63.791  | 13.886 | 1.869   | 4.9476    | 13.6021   | 1.0754   | 1.0811   | 1.2018   | 1.0583   | 0       | 0       | 0       | 0       | 0.00         | 0.0000       | 0.000     |      | 20.05.2019 | 20.34 |
| 27  | 5.2990      | VT-491       | Smg90s | 6.21  | 42.45 | 2.981 | 0.219  | 12.565 | 59.314  | 12.087 | 6.289   | 6.8389    | 14.2412   | 1.0754   | 1.0742   | 1.2018   | 1.0583   | 0       | 0       | 0       | 0       | 0.00         | 0.0000       | 0.000     |      | 20.05.2019 | 20.45 |
| 28  | 3.4840      | NKS-179      | Smg90s | 16.35 | 73.20 | 5.631 | 0.171  | 21.744 | 66.715  | 15.329 | 3.229   | 4.4781    | 13.0005   | 1.0754   | 1.0811   | 1.2018   | 1.0583   | 0       | 0       | 0       | 0       | 0.00         | 0.0000       | 0.000     |      | 20.05.2019 | 20.56 |

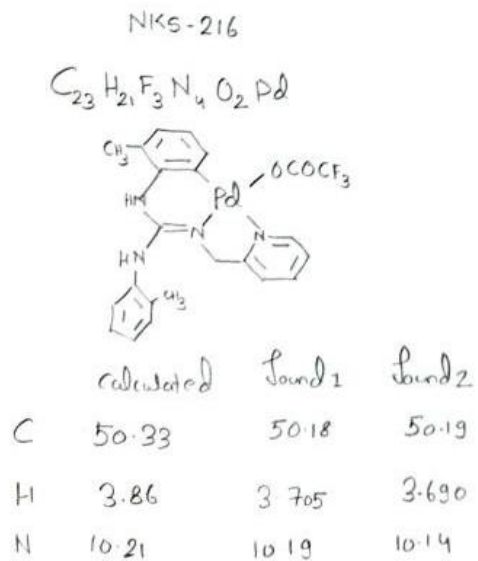

CHNS data of 3.

Document: 30-04-2019 (VarioELcube) from: []

28-06-2019  
varioELcube  
serial number: 19171021

Text report

| No. | Weight [mg] | Name          | Method | N [%] | C [%] | H [%] | S [%]  | N Area | C Area | H Area | S Area  | C/N ratio | C/H ratio | Date       | Time  |
|-----|-------------|---------------|--------|-------|-------|-------|--------|--------|--------|--------|---------|-----------|-----------|------------|-------|
| 11  | 5.3800      | sulfanilamide | 5mg90s | 16.26 | 41.85 | 4.680 | 18.620 | 33.363 | 58.417 | 18.516 | 628.889 | 2.5738    | 8.9423    | 29/04/2019 | 18:27 |
| 16  | 6.4080      | NKS215        | 5mg90s | 11.09 | 57.06 | 5.012 | 0.158  | 29.695 | 89.984 | 22.387 | 5.426   | 5.1435    | 11.3850   | 29/04/2019 | 19:25 |

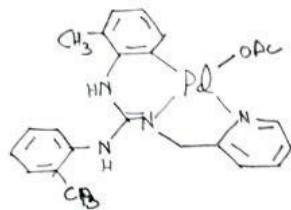

|   | calculated | calculated, % ed. | observed |
|---|------------|-------------------|----------|
| C | 55.82      | 57.4              | 57.06    |
| H | 4.89       | 5.06              | 5.01     |
| N | 11.32      | 10.82             | 11.09    |

CHNS data of 4.

Document: nks-17/9/19 (VarioELcube) from: []

28-06-2019

varioELcube

serial number: 19171021

Text report

| No | Weight [mg] | Name          | Method | N [%] | C [%] | H [%] | S [%]  | N Area | C Area | H Area | S Area  | C/N ratio | C/H ratio | N Factor | C Factor | H Factor | S Factor | N Blank | C Bla. | H Blank | S Blank | Moisture [%] | Prot. Factor | Prot. [%] | Memo | Date             | Time |
|----|-------------|---------------|--------|-------|-------|-------|--------|--------|--------|--------|---------|-----------|-----------|----------|----------|----------|----------|---------|--------|---------|---------|--------------|--------------|-----------|------|------------------|------|
| 13 | 5.7570      | sulfanilamide | Smg90s | 16.26 | 41.85 | 4.680 | 18.620 | 35.020 | 61.467 | 20.764 | 655.780 | 2.5738    | 8.9423    | 1.0959   | 1.1097   | 1.2443   | 1.0970   | 0       | 0      | 0       | 0       | 0.00         | 0.0000       | 0.000     |      | 17/09/2019 13:33 |      |
| 14 | 8.0650      | sulfanilamide | Smg90s | 16.26 | 41.85 | 4.680 | 18.620 | 48.891 | 85.914 | 28.478 | 928.882 | 2.5738    | 8.9423    | 1.0978   | 1.1089   | 1.2919   | 1.0982   | 0       | 0      | 0       | 0       | 0.00         | 0.0000       | 0.000     |      | 17/09/2019 13:47 |      |
| 43 | 4.6030      | NKS 285A      | Smg90s | 9.77  | 61.23 | 5.557 | 0.043  | 16.835 | 71.681 | 19.449 | 1.025   | 6.2682    | 11.0190   | 1.0970   | 1.1108   | 1.2562   | 1.0933   | 0       | 0      | 0       | 0       | 0.00         | 0.0000       | 0.000     |      | 17/09/2019 19:08 |      |
| 44 | 4.7980      | NKS 285B      | Smg90s | 9.73  | 61.12 | 5.574 | 0.031  | 17.481 | 74.535 | 20.395 | 772     | 6.2805    | 10.9636   | 1.0970   | 1.1108   | 1.2562   | 1.0933   | 0       | 0      | 0       | 0       | 0.00         | 0.0000       | 0.000     |      | 17/09/2019 19:19 |      |

NKS-285

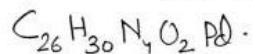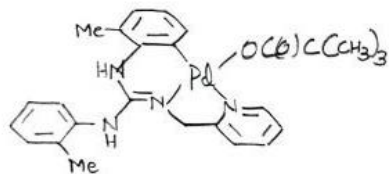

$^1H$  ✓

M.P. 260°C

IR ✓

CHNS ✓

ScXRD ✓

HRMS ✓

Yield 1

|   | calculated | calculated. 1/2 ad. | NKS-285A | NKS-285B |
|---|------------|---------------------|----------|----------|
| C | 58.16      | 60.77               | 61.23    | 61.12    |
| H | 5.63       | 5.88                | 5.557    | 5.574    |
| N | 10.43      | 9.61                | 9.77     | 9.73     |

CHNS data of 5.

28-06-2019  
 varioELcube  
 serial number: 19171021

Text report

| No. | Weight (mg) | Name     | Method | N (%) | C (%) | H (%) | S (%) | N Area | C Area | H Area | S Area | C/N ratio | C/H ratio | N Factor | C Factor | H Factor | S Factor | N Blank | C Bla. | H Blank | S Blank | Moisture (%) | Prot. Factor | Prot. (%) | Memo  | Date | Time             |
|-----|-------------|----------|--------|-------|-------|-------|-------|--------|--------|--------|--------|-----------|-----------|----------|----------|----------|----------|---------|--------|---------|---------|--------------|--------------|-----------|-------|------|------------------|
| 27  | 4.5610      | NKS-293B | SmrPd  | 9.46  | 44.04 | 2.485 | 0.060 | 16.149 | 51.302 | 8.490  |        | 1.432     | 4.6550    | 17.7231  | 1.0976   | 1.1108   | 1.2390   | 1.0906  | 0      | 0       | 0       | 0            | 0.00         | 0.0000    | 0.000 |      | 26/08/2019 19:10 |
| 28  | 4.5270      | NKS-220A | SmrPd  | 8.76  | 42.33 | 2.007 | 0.090 | 14.843 | 49.411 | 6.707  |        | 2.139     | 4.8321    | 21.0923  | 1.0976   | 1.1008   | 1.2390   | 1.0906  | 0      | 0       | 0       | 0            | 0.00         | 0.0000    | 0.000 |      | 26/08/2019 19:21 |

Nks-293

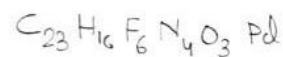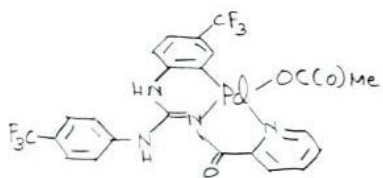

|   | Calculated | observed |
|---|------------|----------|
| C | 44.79      | 44.04    |
| H | 2.61       | 2.485    |
| N | 9.08       | 9.46     |

NKS-220

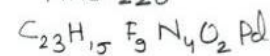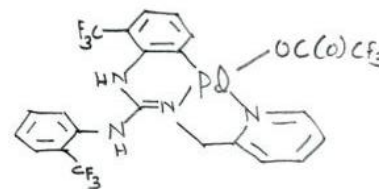

|   | Calculated | observed |
|---|------------|----------|
| C | 42.06      | 42.33    |
| H | 2.30       | 2.007    |
| N | 8.53       | 8.76     |

CHNS data of 6.

28-06-2019  
 varioELcube  
 serial number: 19171021

Text report

| No | Weght [mg] | Name        | Method | N [%] | C [%] | H [%] | S [%]  | N Area | C Area  | H Area | S Area    | C/N ratio | C/H ratio | N Factor | C Factor | H Factor | S Factor | N Blank | C Bla | H Blank | S Blank | Moisture [%] | Prot. Factor | Prot. [%] | Memo | Date             | Time |
|----|------------|-------------|--------|-------|-------|-------|--------|--------|---------|--------|-----------|-----------|-----------|----------|----------|----------|----------|---------|-------|---------|---------|--------------|--------------|-----------|------|------------------|------|
| 7  | 9.9546     | isulanamide | Smg90s | 16.26 | 41.85 | 4.680 | 18.620 | 62.740 | 107.196 | 34.664 | 1.179.221 | 2.5738    | 8.9423    | 1.0540   | 1.0992   | 1.3206   | 1.0812   | 0       | 0     | 0       | 0       | 0.00         | 0.0000       | 0.000     |      | 23/10/2020 11:10 |      |
| 41 | 4.8830     | NKS-230A    | Smg90s | 9.64  | 45.88 | 2.627 | 0.056  | 18.350 | 58.064  | 9.057  | 1.453     | 4.7576    | 17.4648   | 1.0540   | 1.0992   | 1.3206   | 1.0812   | 0       | 0     | 0       | 0       | 0.00         | 0.0000       | 0.000     |      | 23/10/2020 13:22 |      |
| 42 | 3.2670     | NKS-230B    | Smg90s | 9.94  | 45.84 | 2.387 | 0.068  | 12.662 | 38.970  | 5.333  | 1.171     | 4.6097    | 19.2045   | 1.0540   | 1.0992   | 1.3206   | 1.0812   | 0       | 0     | 0       | 0       | 0.00         | 0.0000       | 0.000     |      | 23/10/2020 13:33 |      |
| 60 | 3.8460     | CH3CN       | Smg90s | 11.90 | 45.79 | 2.294 | 0.050  | 17.829 | 45.758  | 6.076  | 1.023     | 3.8490    | 19.9621   | 1.0540   | 1.0992   | 1.3206   | 1.0812   | 0       | 0     | 0       | 0       | 0.00         | 0.0000       | 0.000     |      | 24/10/2020 02:50 |      |

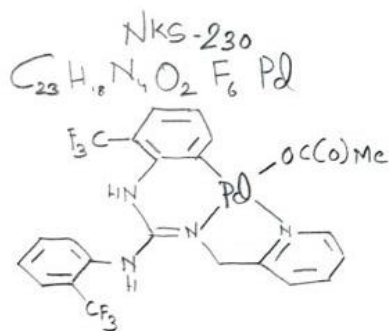

|   | Calculated | Observed | Observed |
|---|------------|----------|----------|
| C | 45.83      | 45.88    | 45.84    |
| H | 3.01       | 2.63     | 2.39     |
| N | 9.29       | 9.64     | 9.94     |

CHNS data of 7.

28-06-2019  
 varioELcube  
 serial number: 19171021

Text report

| No | Weight [mg] | Name          | Method | N [N] | C [N] | H [N] | S [N]  | N Area | C Area | H Area | S Area  | C/N ratio | C/H ratio | N Factor | C Factor | H Factor | S Factor | N Blank | C Bl. | H Blank | S Blank | Moisture [N] | Prot. Factor | Prot. [N] | Memo | Date       | Time  |
|----|-------------|---------------|--------|-------|-------|-------|--------|--------|--------|--------|---------|-----------|-----------|----------|----------|----------|----------|---------|-------|---------|---------|--------------|--------------|-----------|------|------------|-------|
| 13 | 4.0880      | sulfenilamide | 5mg90s | 16.26 | 41.85 | 4.680 | 18.620 | 25.026 | 43.743 | 14.501 | 472.291 | 2.5738    | 8.9423    | 1.0902   | 1.1114   | 1.2334   | 1.0715   | 0       | 0     | 0       | 0       | 0.00         | 0.0000       | 0.000     |      | 26/08/2019 | 14:37 |
| 14 | 6.8540      | sulfenilamide | 5mg90s | 16.26 | 41.85 | 4.680 | 18.620 | 41.496 | 72.970 | 24.500 | 788.107 | 2.5738    | 8.9423    | 1.1002   | 1.1102   | 1.2571   | 1.0931   | 0       | 0     | 0       | 0       | 0.00         | 0.0000       | 0.000     |      | 26/08/2019 | 14:51 |
| 22 | 6.5530      | NKS 288A      | 5mg90s | 8.67  | 48.90 | 3.873 | 0.127  | 21.287 | 81.223 | 19.543 | 4.397   | 5.6396    | 12.6254   | 1.0960   | 1.1125   | 1.2408   | 1.0865   | 0       | 0     | 0       | 0       | 0.00         | 0.0000       | 0.000     |      | 26/08/2019 | 16:20 |
| 23 | 5.5940      | NKS 288B      | 5mg90s | 8.73  | 48.72 | 3.603 | 0.168  | 18.306 | 69.248 | 15.249 | 4.951   | 5.5790    | 13.5211   | 1.0960   | 1.1125   | 1.2408   | 1.0865   | 0       | 0     | 0       | 0       | 0.00         | 0.0000       | 0.000     |      | 26/08/2019 | 16:32 |

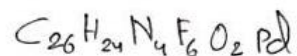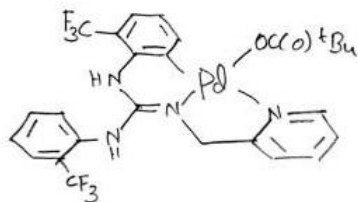

|   | Calculated | NKS-288A | NKS-288B |
|---|------------|----------|----------|
| C | 48.42      | 48.90    | 48.72    |
| H | 3.75       | 3.873    | 3.603    |
| N | 8.69       | 8.67     | 8.73     |

CHNS data of 8.



Text report

| No. | Weight [mg] | Name          | Method | N [%] | C [%] | H [%] | S [%]  | N Area | C Area | H Area | S Area  | C/N ratio | C/H ratio | Info | Date       | Time  |
|-----|-------------|---------------|--------|-------|-------|-------|--------|--------|--------|--------|---------|-----------|-----------|------|------------|-------|
| 8   | 8.0050      | sulfanilamide | 5mg90s | 16.26 | 41.85 | 4.680 | 18.620 | 53.279 | 87.133 | 28.870 | 915.112 | 2.5738    | 8.9423    |      | 08/04/2021 | 13:49 |
| 9   | 7.2900      | sulfanilamide | 5mg90s | 16.26 | 41.85 | 4.680 | 18.620 | 48.041 | 79.464 | 26.465 | 838.469 | 2.5738    | 8.9423    |      | 08/04/2021 | 14:04 |
| 10  | 7.8600      | sulfanilamide | 5mg90s | 16.26 | 41.85 | 4.680 | 18.620 | 51.313 | 85.593 | 28.666 | 918.979 | 2.5738    | 8.9423    |      | 08/04/2021 | 14:18 |
| 11  | 6.4260      | sulfanilamide | 5mg90s | 16.26 | 41.85 | 4.680 | 18.620 | 42.149 | 70.281 | 23.103 | 752.814 | 2.5738    | 8.9423    |      | 08/04/2021 | 14:32 |
| 14  | 5.3520      | NKS-216P      | 5mg90s | 6.88  | 60.72 | 4.392 | 0.225  | 14.963 | 84.679 | 17.763 | 6.328   | 8.8252    | 13.8257   | Su   | 08/04/2021 | 15:06 |

NKS-216P

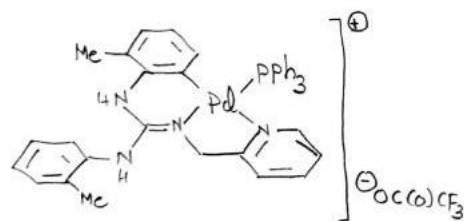

|   | <u>calculated</u>         | <u>observed</u> |
|---|---------------------------|-----------------|
|   | $C_{41}H_{36}N_4F_3O_2Pd$ |                 |
| C | 60.71                     | 60.72           |
| H | 4.47                      | 4.39            |
| N | 6.91                      | 6.88            |

CHNS data of 10.

Text report

| No. | Weight [mg] | Name          | Method | N [%] | C [%] | H [%] | S [%]  | N Area | C Area | H Area | S Area  | C/N ratio | C/H ratio | Info | Date       | Time  |
|-----|-------------|---------------|--------|-------|-------|-------|--------|--------|--------|--------|---------|-----------|-----------|------|------------|-------|
| 11  | 5.4490      | sulfanilamide | 5mg90s | 16.26 | 41.85 | 4.680 | 18.620 | 37.088 | 58.602 | 19.456 | 569.388 | 2.5738    | 8.9423    |      | 21/08/2021 | 17:55 |
| 14  | 5.0130      | NKS-220P      | 5mg90s | 6.19  | 53.81 | 3.047 | 0.285  | 16.764 | 66.733 | 12.244 | 6.824   | 8.6983    | 17.6622   | Su   | 21/08/2021 | 18:28 |

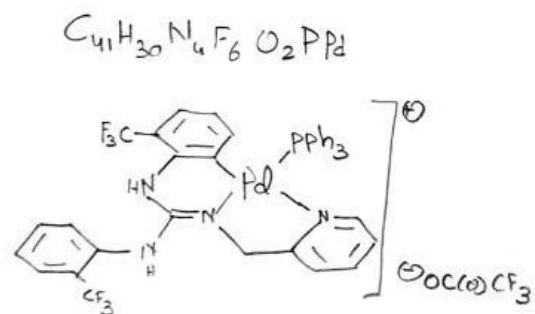

|   | calculated | observed |
|---|------------|----------|
| C | 53.58      | 53.81    |
| H | 3.29       | 3.05     |
| N | 6.10       | 6.19     |

CHNS data of 11.

Text report

| No. | Weight (mg) | Name          | Method | N [%] | C [%] | H [%] | S [%]  | N Area | C Area | H Area | S Area  | C/N ratio | C/H ratio | Info | Date       | Time  |
|-----|-------------|---------------|--------|-------|-------|-------|--------|--------|--------|--------|---------|-----------|-----------|------|------------|-------|
| 11  | 5.4490      | sulfanilamide | 5mg90s | 16.26 | 41.85 | 4.680 | 18.620 | 37 088 | 58 602 | 19 456 | 569 388 | 2.5738    | 8.9423    |      | 21/08/2021 | 17:55 |
| 12  | 4.9640      | NKS-216(2,6   | 5mg90s | 10.37 | 56.76 | 4.510 | 0.443  | 23 226 | 74 142 | 18 563 | 10 485  | 5.4740    | 12.5848   | Su   | 21/08/2021 | 18:06 |

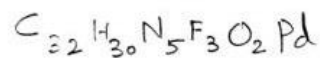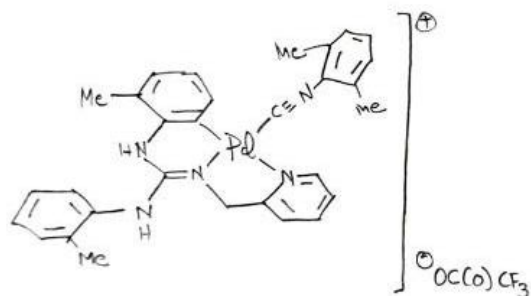

|   | calculated | observed |
|---|------------|----------|
| C | 56.52      | 56.76    |
| H | 4.45       | 4.51     |
| N | 10.30      | 10.37    |

CHNS data of 13.

Text report

| No. | Weight [mg] | Name          | Method | N [%] | C [%] | H [%] | S [%]  | N Area | C Area | H Area | S Area  | C/N ratio | C/H ratio | Info | Date       | Time  |
|-----|-------------|---------------|--------|-------|-------|-------|--------|--------|--------|--------|---------|-----------|-----------|------|------------|-------|
| 11  | 5.4490      | sulfanilamide | 5mg90s | 16.26 | 41.85 | 4.680 | 18.620 | 37.088 | 58.602 | 19.456 | 569.388 | 2.5738    | 8.9423    |      | 21/08/2021 | 17:55 |
| 13  | 5.0890      | nks-220(2.6)  | 5mg90s | 9.20  | 48.84 | 3.052 | 0.285  | 21.137 | 66.121 | 12.472 | 6.924   | 5.3066    | 16.0039   | Su   | 21/08/2021 | 18:17 |

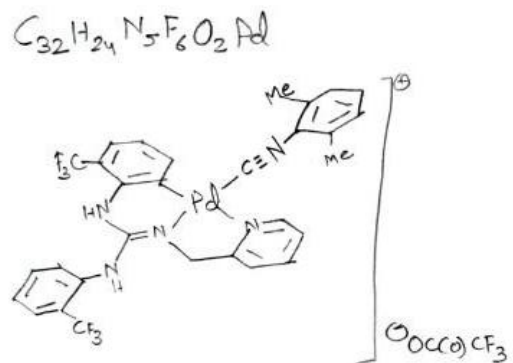

|   | calculated | observed |
|---|------------|----------|
| C | 48.78      | 48.84    |
| H | 3.07       | 3.05     |
| N | 8.89       | 9.20     |

CHNS data of 14.

Text report

| No. | Weight [mg] | Name          | Method | N [%] | C [%] | H [%] | S [%]  | N Area | C Area | H Area | S Area  | C/N ratio | C/H ratio | Info | Date       | Time  |
|-----|-------------|---------------|--------|-------|-------|-------|--------|--------|--------|--------|---------|-----------|-----------|------|------------|-------|
| 10  | 7.8600      | sulfanilamide | 5mg90s | 16.26 | 41.85 | 4.680 | 18.620 | 51 313 | 85 593 | 28 666 | 918 979 | 2.5738    | 8.9423    |      | 08/04/2021 | 14:18 |
| 11  | 6.4260      | sulfanilamide | 5mg90s | 16.26 | 41.85 | 4.680 | 18.620 | 42 149 | 70 281 | 23 103 | 752 814 | 2.5738    | 8.9423    |      | 08/04/2021 | 14:32 |
| 12  | 5.3990      | NKS-209(2,6)  | 5mg90s | 12.17 | 61.70 | 4.725 | 0.432  | 26 665 | 86 769 | 19 389 | 12 261  | 5.0715    | 13.0599   | Su   | 08/04/2021 | 14:44 |

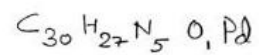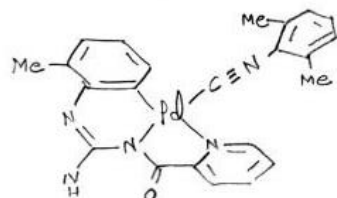

|   | Calculated | Observed | Calculated $2H_2O$ |
|---|------------|----------|--------------------|
| C | 62.13      | 61.70    | 61.65              |
| H | 4.69       | 4.72     | 4.74               |
| N | 12.08      | 12.17    | 11.98              |

CHNS data of 15.

Text report

| No. | Weight [mg] | Name          | Method | N [%] | C [%] | H [%] | S [%]  | N Area | C Area | H Area | S Area  | C/N ratio | C/H ratio | Info | Date       | Time  |
|-----|-------------|---------------|--------|-------|-------|-------|--------|--------|--------|--------|---------|-----------|-----------|------|------------|-------|
| 11  | 7.3980      | sulfanilamide | 5mg90s | 16.26 | 41.85 | 4.680 | 18.620 | 47 619 | 80 378 | 27 352 | 850 139 | 2.5738    | 8.9423    |      | 28/06/2021 | 18:58 |
| 12  | 7.3600      | sulfanilamide | 5mg90s | 16.26 | 41.85 | 4.680 | 18.620 | 47 370 | 79 780 | 27 092 | 849 730 | 2.5738    | 8.9423    |      | 28/06/2021 | 19:12 |
| 18  | 6.2610      | NKS-279 (2,6) | 5mg90s | 10.47 | 52.55 | 3.232 | 0.081  | 25 958 | 85 284 | 15 226 | 2 631   | 5.0170    | 16.2589   | Su   | 28/06/2021 | 20:18 |

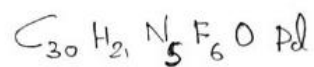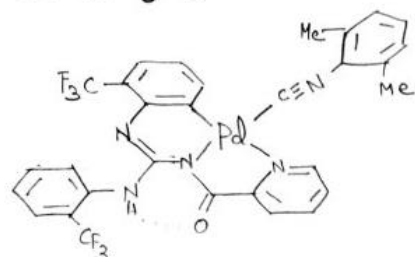

Calculated      observed

|   |       |       |
|---|-------|-------|
| C | 52.38 | 52.55 |
| H | 3.08  | 3.23  |
| N | 10.18 | 10.47 |

CHNS data of 16.

Document: 21-08-2021 nks (VarioELcube) from: I

28-06-2019  
varioELcube  
serial number: 19171021

Text report

| No. | Weight (mg) | Name          | Method | N [%] | C [%] | H [%] | S [%]  | N Area | C Area | H Area | S Area  | C/N ratio | C/H ratio | Info | Date       | Time  |
|-----|-------------|---------------|--------|-------|-------|-------|--------|--------|--------|--------|---------|-----------|-----------|------|------------|-------|
| 11  | 5.4490      | sulfanilamide | 5mg90s | 16.26 | 41.85 | 4.680 | 18.620 | 37 088 | 58 602 | 19 456 | 569 388 | 2.5738    | 8.9423    |      | 21/08/2021 | 17:55 |
| 18  | 1.6160      | NKS-288(2.6)  | 5mg90s | 10.63 | 53.19 | 3.163 | 0.726  | 9 943  | 19 614 | 3 241  | 5 591   | 5.0029    | 16.8160   | Su   | 21/08/2021 | 19:15 |

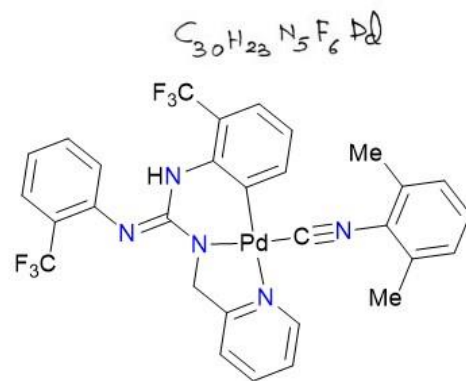

|   | Calculated | Observed |
|---|------------|----------|
| C | 53.46      | 53.19    |
| H | 3.44       | 3.16     |
| N | 10.39      | 10.63    |

CHNS data of 17.

## References

1. D. P. Bancroft, F. A. Cotton, L. R. Falvello and W. Schwotzer, *Polyhedron* 1988, **7**, 615–621.
2. H. Parihar and N. Thirupathi, *Org. Lett.*, 2022, **24**, 8098–8103.
3. ENHANCE, Oxford Xcalibur Single Crystal Diffractometer, version 1.171.34.49; Oxford Diffraction Ltd: Oxford, U.K., 2006.
4. CrysAlisPro, version 1.171.34.49; Oxford Diffraction Ltd: Oxford, U.K., 2011.
5. G. M. Sheldrick, University of Gottingen, Gottingen, Germany, 2017.
6. O. V. Dolomanov, L. J. Bourhis, R. J. Gildea, J. A. K. Howard and H. Puschmann, OLEX2: A Complete Structure Solution, Refinement and Analysis Program. *J. Appl. Crystallogr.* 2009, **42**, 339–341.
7. Diamond-Crystal and Molecular Structure Visualization Crystal Impact-Dr. H. Putz & Dr. K. Brandenburg GbR, Kreuzherrenstr. 102, 53227 Bonn, Germany.  
<http://www.crystalimpact.com/diamond>.
8. A. D. Becke, *Phys. Rev. A*, 1988, **38**, 3098–3100.
9. A. D. Becke, *J. Chem. Phys.*, 1993, **98**, 1372–1377.
10. A. D. Becke, *J. Chem. Phys.*, 1993, **98**, 5648–5652.
11. R. Krishnan, J. S. Binkley, R. Seeger and J. A. Pople, *J. Chem. Phys.* 1980, **72**, 650–654.
12. T. H. Dunning Jr., P. J. Hay, In: H.F. Schaefer III. (Ed.), *Modern Theoretical Chemistry*, Plenum, New York, 1976.
13. P. J. Hay and W.R. Wadt, *J. Chem. Phys.*, 1985, **82**, 270–283.
14. P. J. Hay and W.R. Wadt, *J. Chem. Phys.*, 1985, **82**, 284–298.
15. P. J. Hay and W.R. Wadt, *J. Chem. Phys.*, 1985, **82**, 299–310.



16. M. J. Frisch, G. W. Trucks, H. B. Schlegel, G. E. Scuseria, M. A. Robb, J.R. Cheeseman, J. A. Montgomery Jr., T.Vreven, K. N. Kudin, J. C. Burant, J. M. Millam, S. S. Iyengar, J. Tomasi, V. Barone, B. Mennucci, M. Cossi, G. Scalmani, N. Rega, G.A. Petersson, H. Nakatsuji, M. Hada, M. Ehara, K. Toyota, R. Fukuda, J. Hasegawa, M. Ishida, T. Nakajima, Y. Honda, O. Kitao, H. Nakai, M. Klene, X. Li, J. E. Knox, H. P. Hratchian, J. B. Cross, C. Adamo, J. Jaramillo, R. Gomperts, R. E Stratmann, O. Yazyev, A. J. Austin, R. Cammi, C. Pomelli, J. W. Ochterski, P. Y. Ayala, K. Morokuma, G. A. Voth, P. Salvador, J. J Dannenberg, V. G. Zakrzewski, S. Dapprich, A. D. Daniels, M. C. Strain, O. Farkas, D. K. Malick, A. D. Rabuck, K. Raghavachari, J. B. Foresman, J. V. Ortiz, Q. Cui, A. G. Baboul, S. Clifford, J. Cioslowski, B. B. Stefanov, G. Liu, A. Liashenko, P. Piskorz, I. Komaromi, R. L. Martin, D. J. Fox, T. Keith, M. A. Al-Laham, C. Y. Peng, A. Nanayakkara, M. Challacombe, P. M. W. Gill, B. Johnson, W. Chen, M. W. Wong, C. Gonzalez and J. A. Pople, Gaussian09, rev. A.02, Gaussian, Inc., Wallingford CT, 2009.
17. E. Cancès, B. Mennucci and J. Tomasi, *J. Chem. Phys.* 1997, **107**, 3032–3041.
18. M. Cossi, V. Barone, B. Mennucci and J. Tomasi, *Chem. Phys. Lett.* 1998, **286**, 253–260.
19. B. Mennucci and J. Tomasi, *Chem. Phys.* 1997, **106**, 5151–5158.
20. N. K. Sinha and N. Thirupathi, *Organometallics*, 2021, **40**, 3535–3549.
